# Supplementary material
Source: PubMed Central journal article supplement (PMC5584476)

Fig. S2

**SPO3155 (COG2983) (\*HTCC2255-Basal)**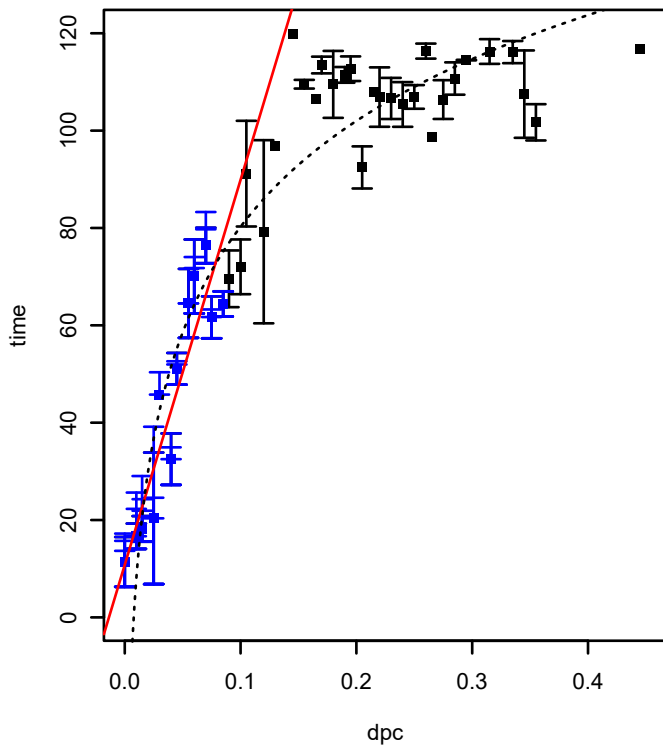**SPO0726 (COG0188)**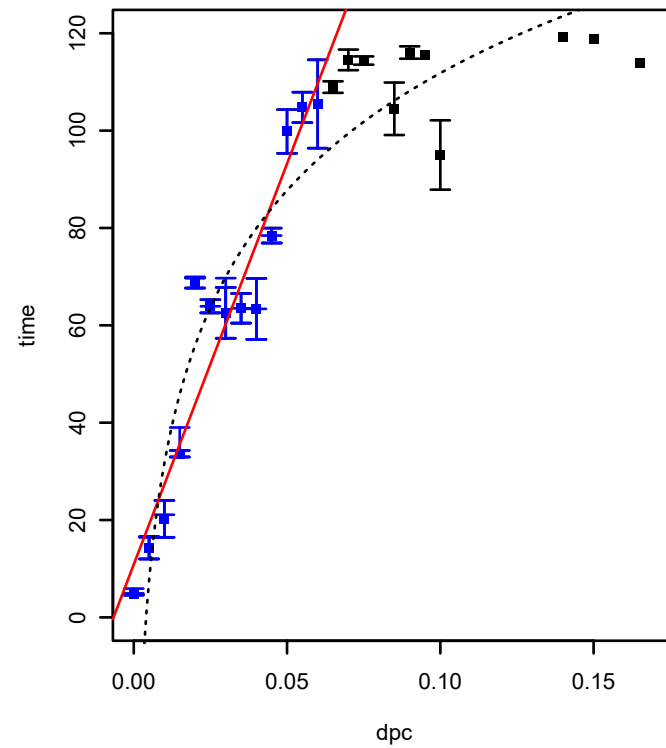**SPO1681 (COG1200) (\*HTCC2255-Basal)**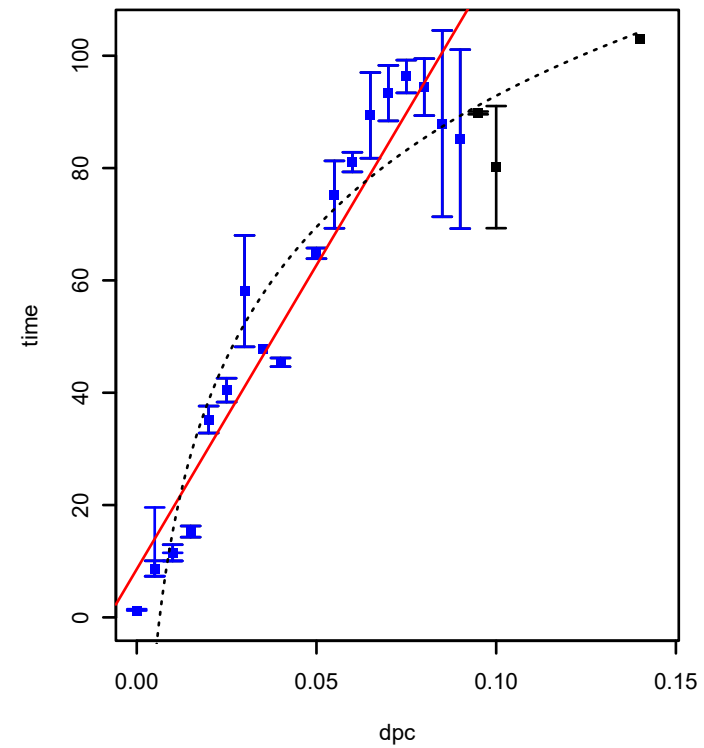**SPO3222 (COG0435) (\*HTCC2255-Basal)**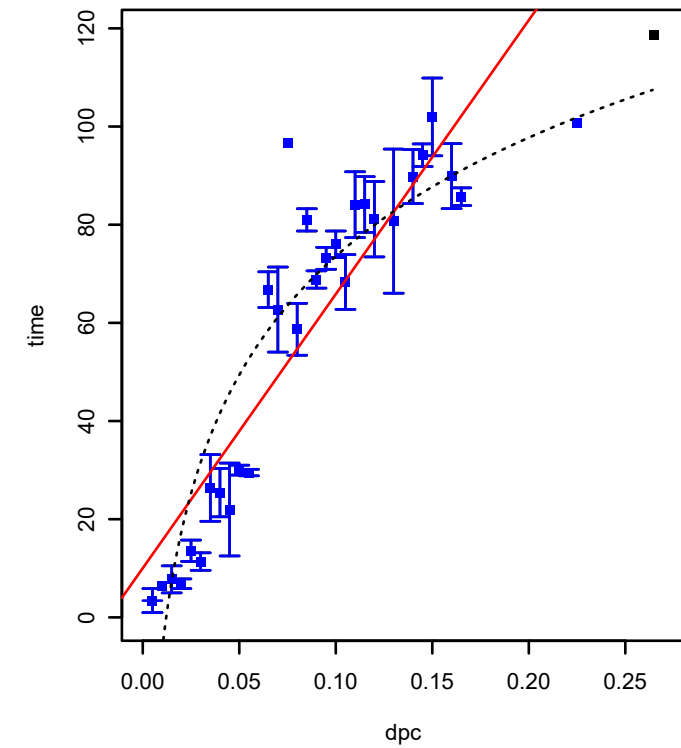**SPO2517 (COG4783) (\*HTCC2255-Basal)**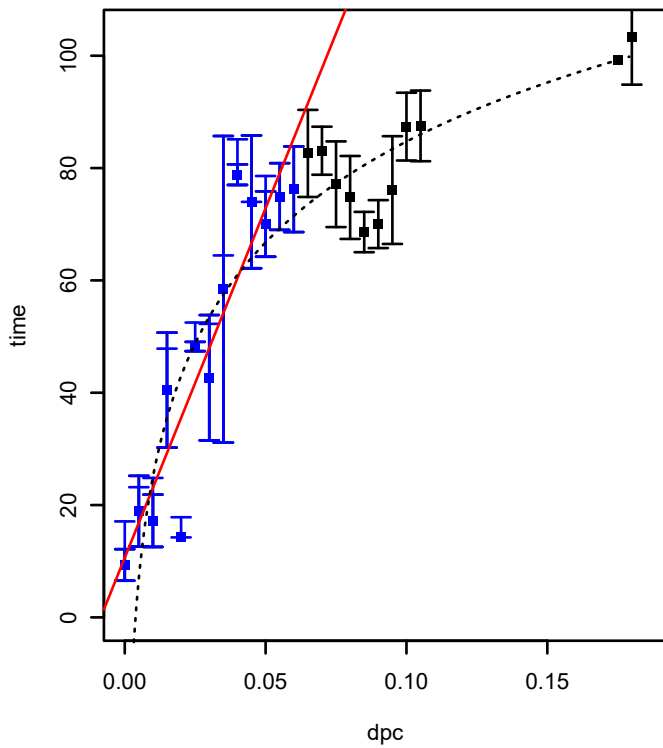**SPO0923 (COG0458) (\*HTCC2255-Basal)**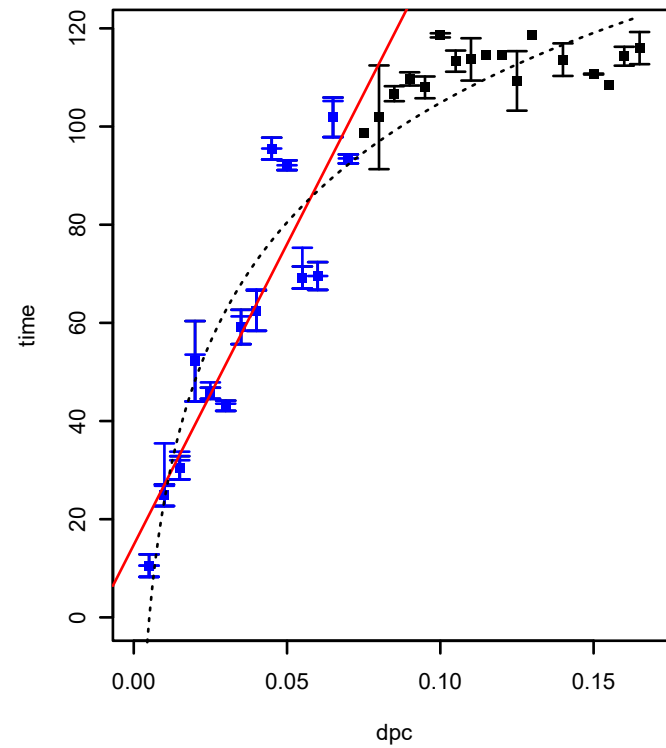**SPO3812 (COG0793) (\*HTCC2255-Basal)**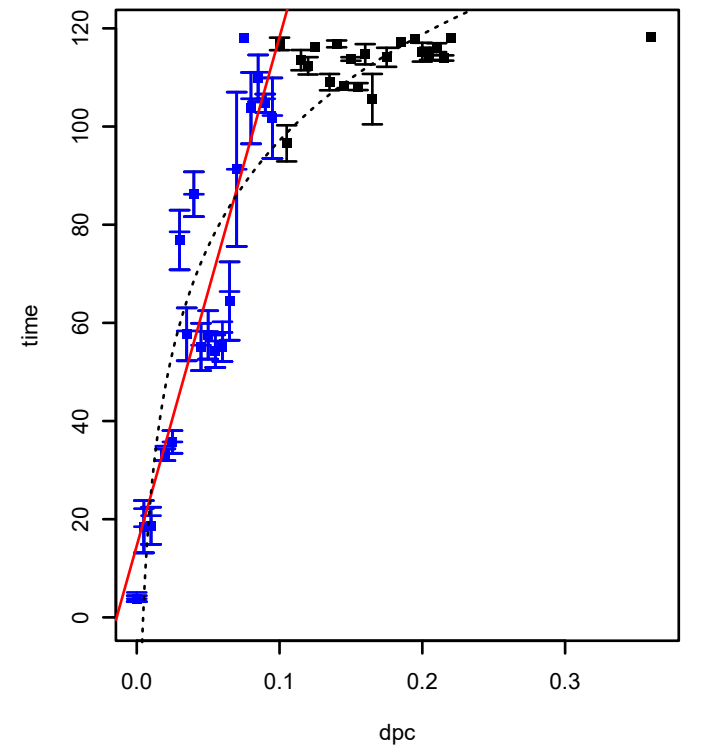**SPO2764 (COG1008) (\*HTCC2255-Basal)**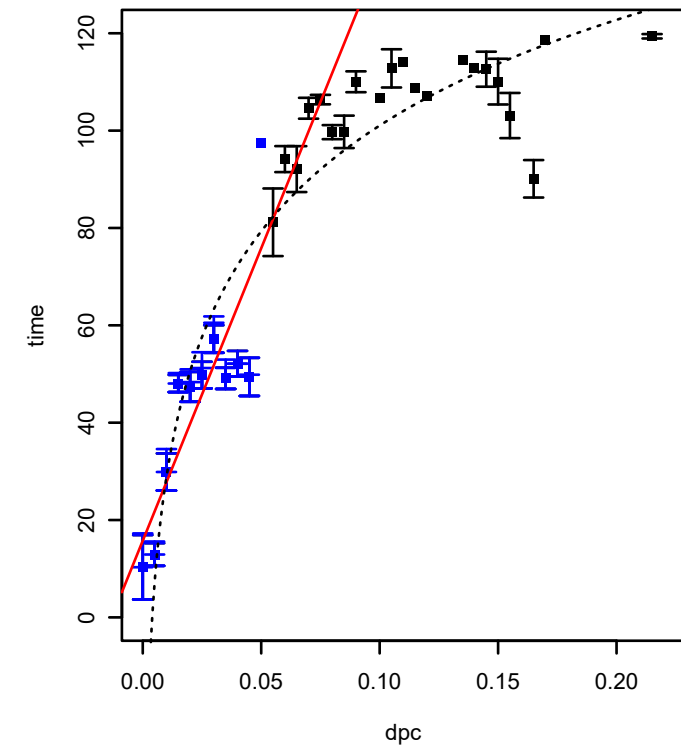

**SPO2165 (COG2166) (\*HTCC2255-Basal)**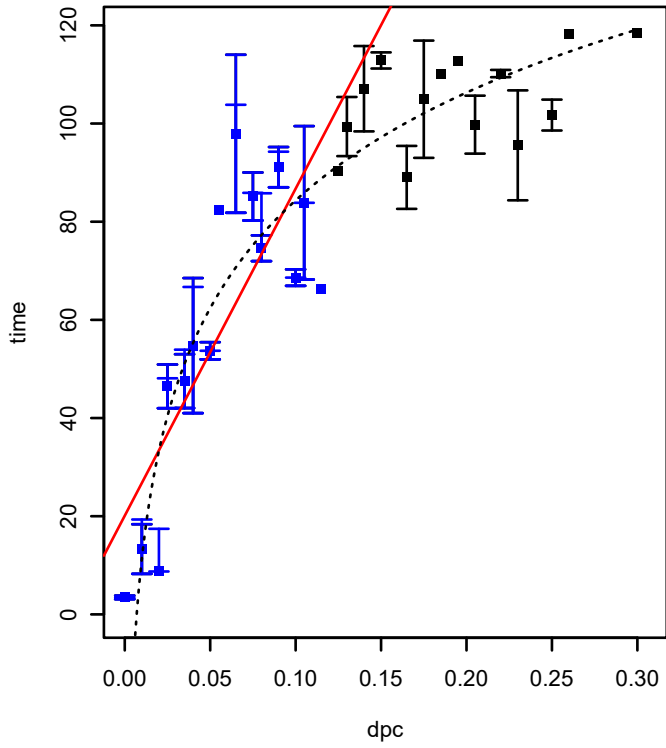**SPO0493 (COG0255)**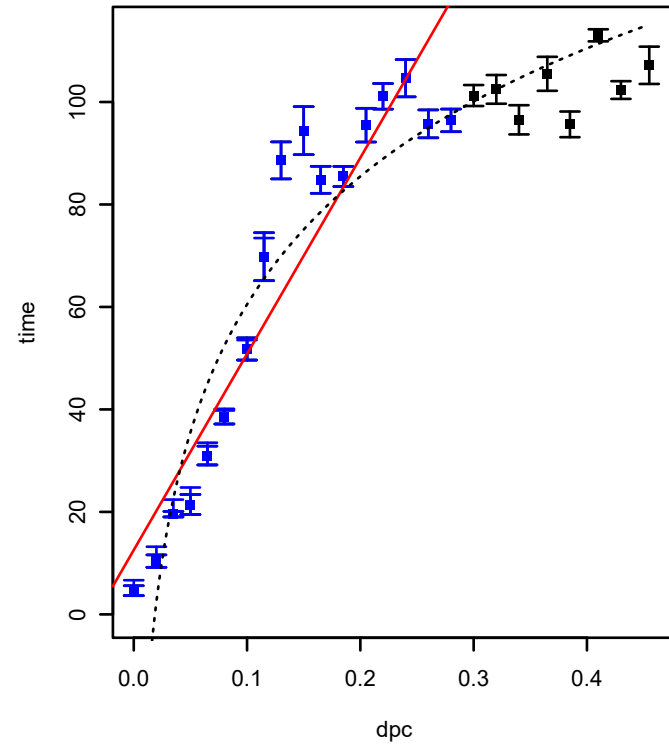**SPO2490 (COG2913) (\*HTCC2255-Basal)**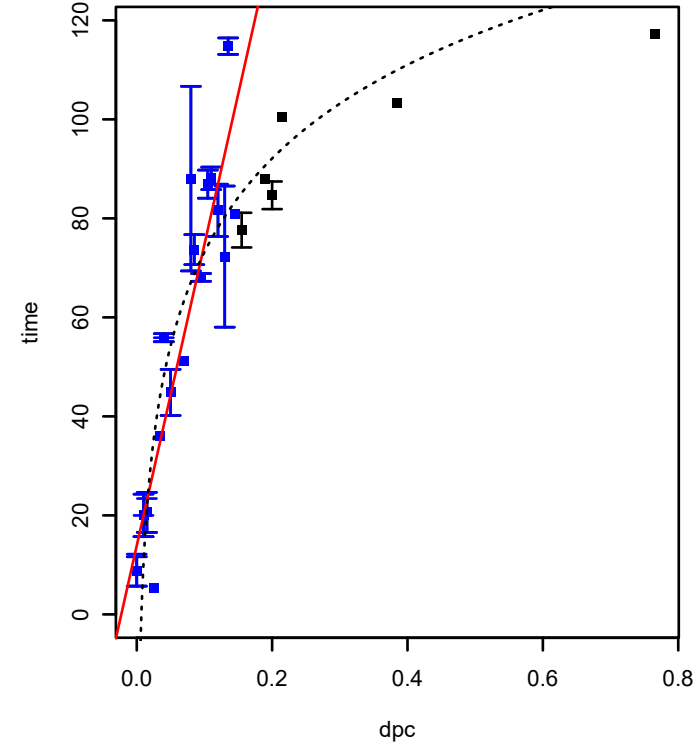**SPO3259 (COG0336)**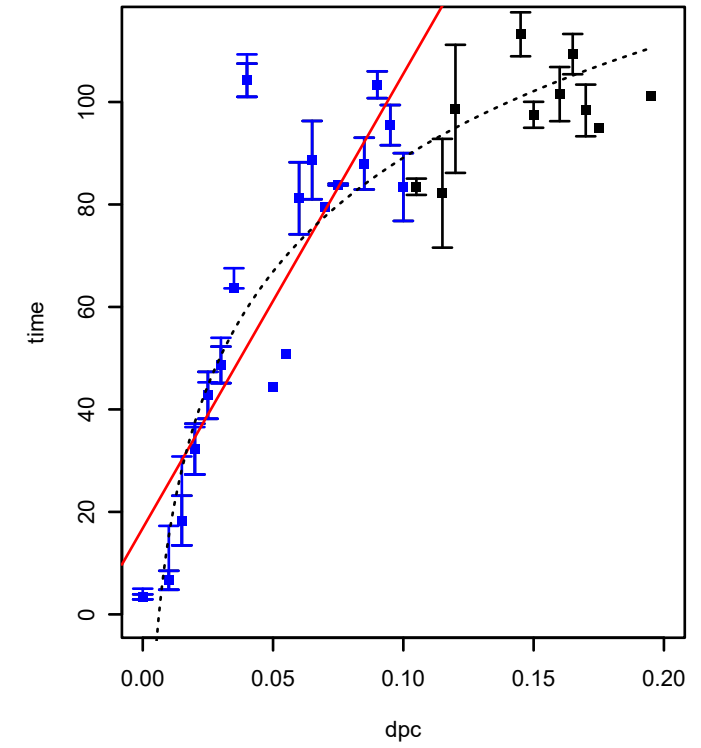**SPO3759 (COG1058) (\*HTCC2255-Basal)**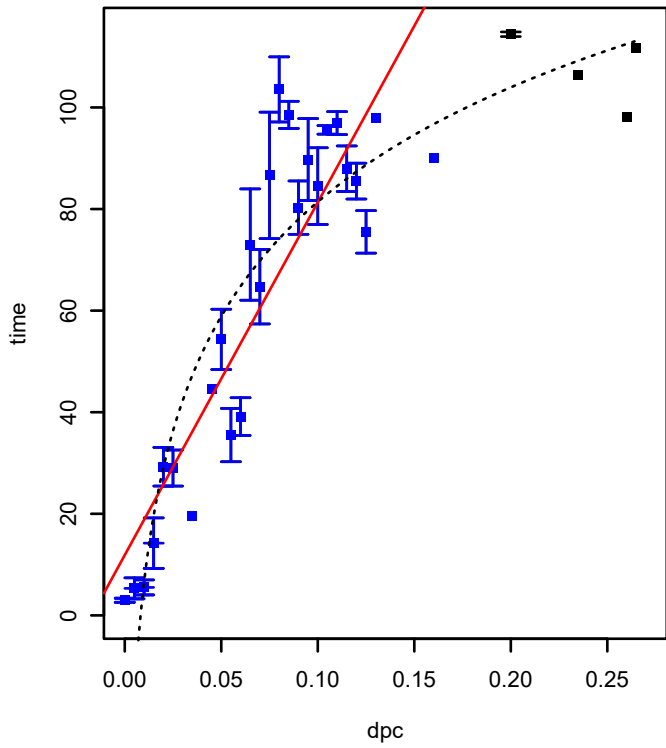**SPO2498 (COG0717)**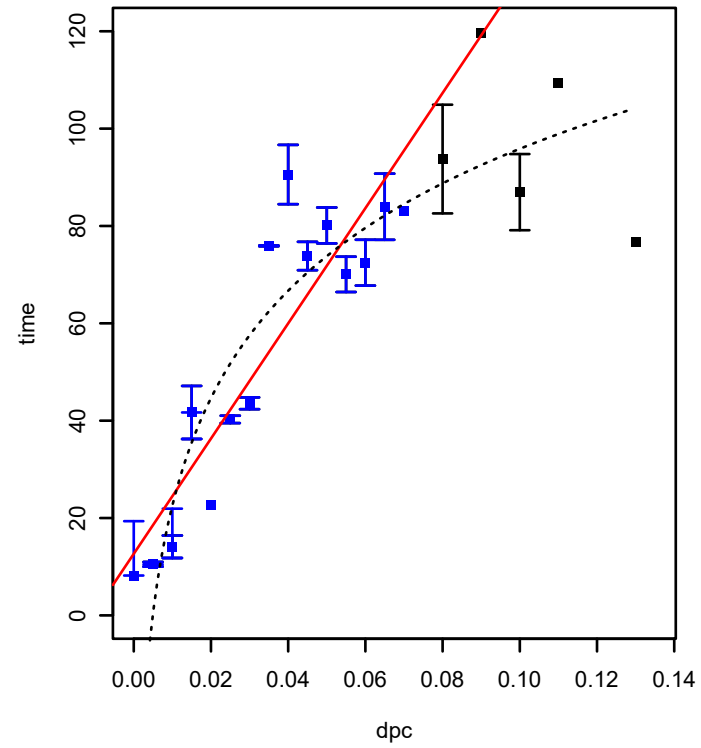**SPO1270 (COG0346)**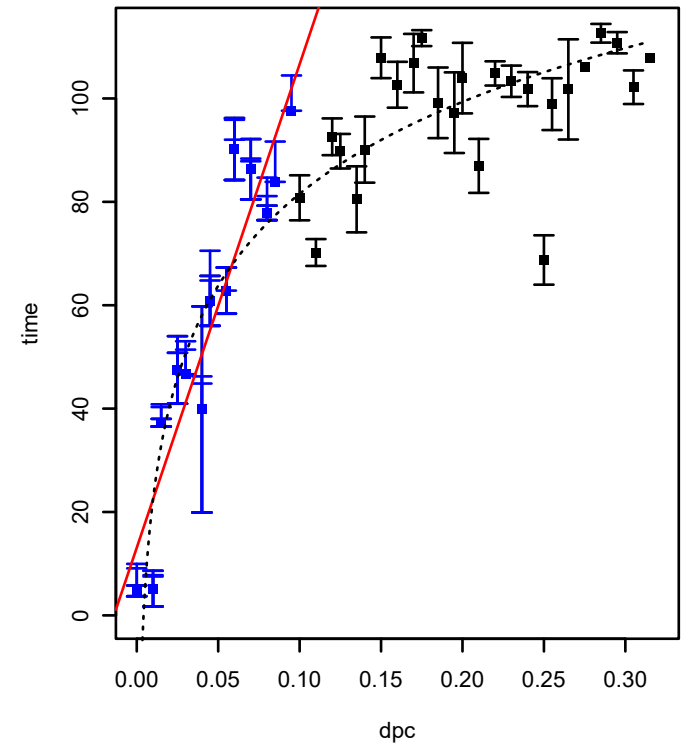**SPO0230 (COG5590)**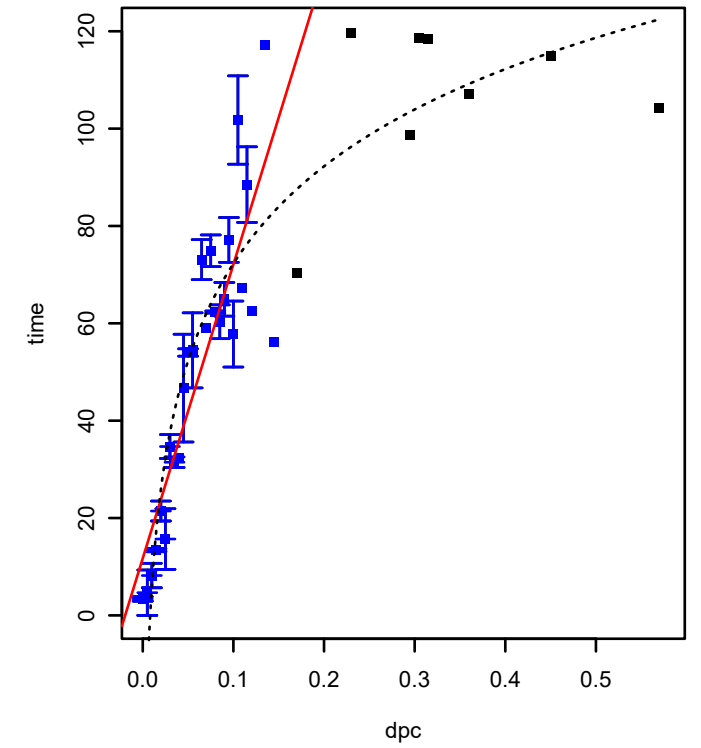

**SPO0497 (COG0094) (\*HTCC2255-Basal)**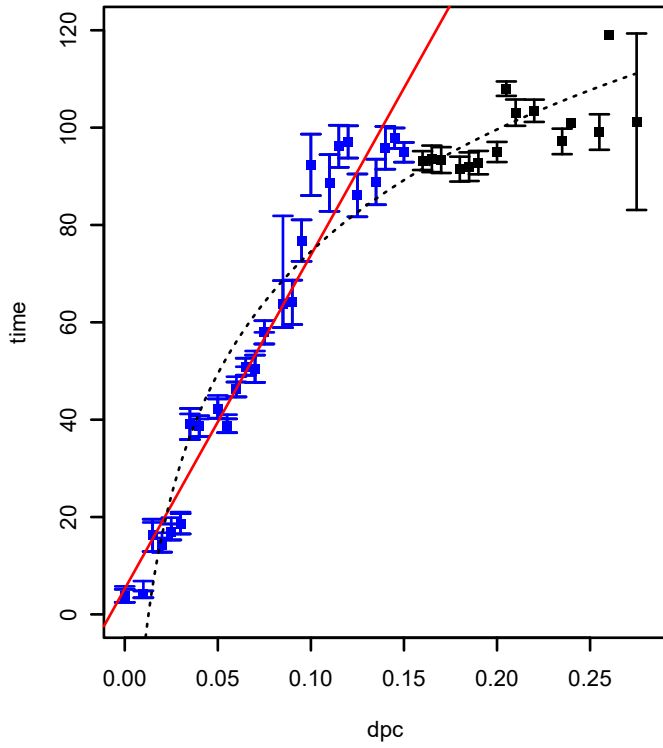**SPO3067 (COG0277) (\*HTCC2255-Basal)**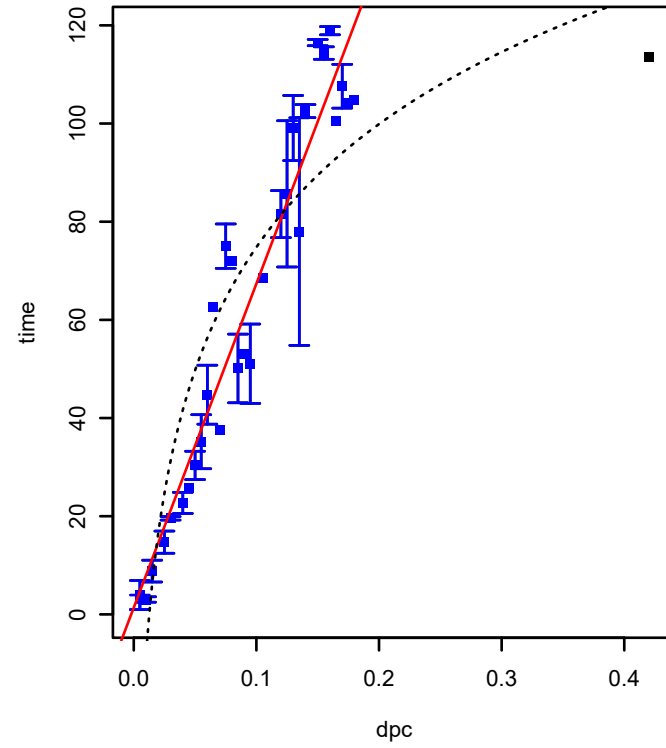**SPO2328 (COG1160) (\*HTCC2255-Basal)**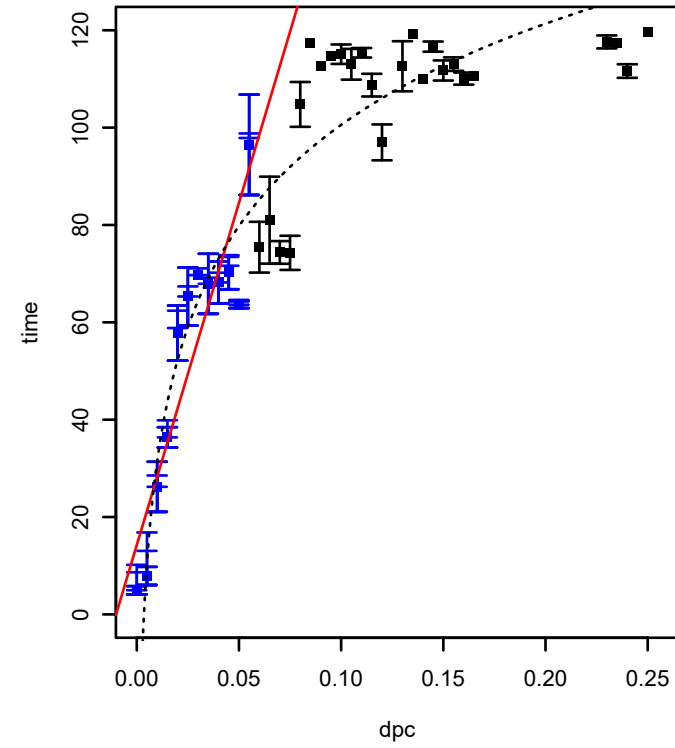**SPOA0002 (COG0621)**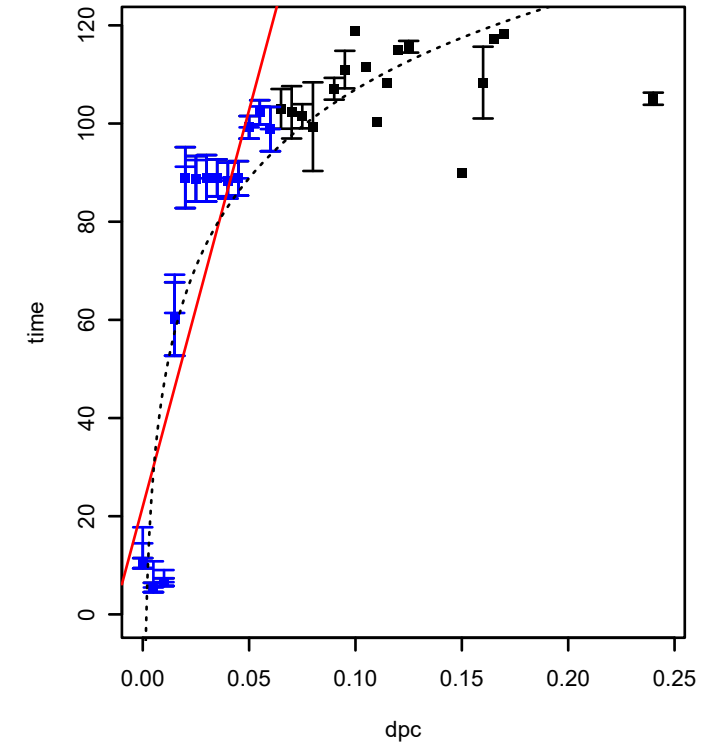**SPO3741 (COG0229)**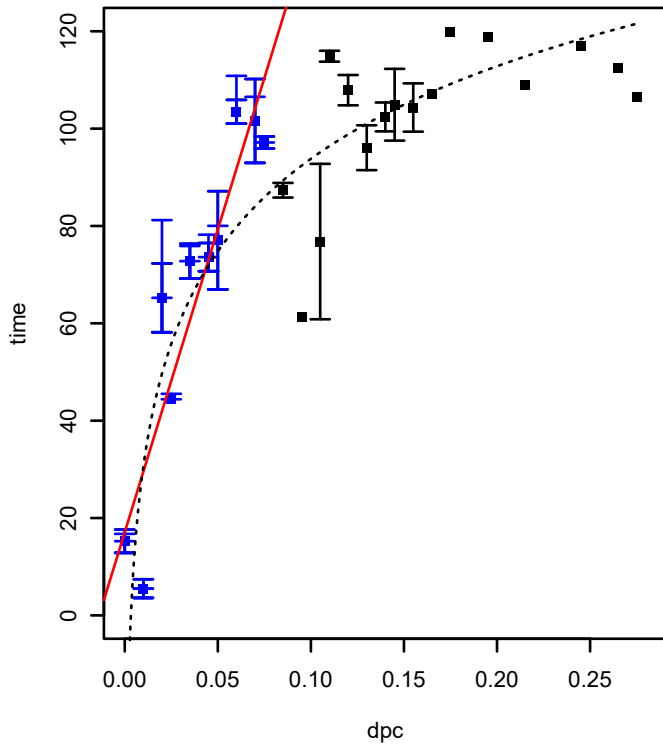**SPO2271 (COG0304) (\*HTCC2255-Basal)**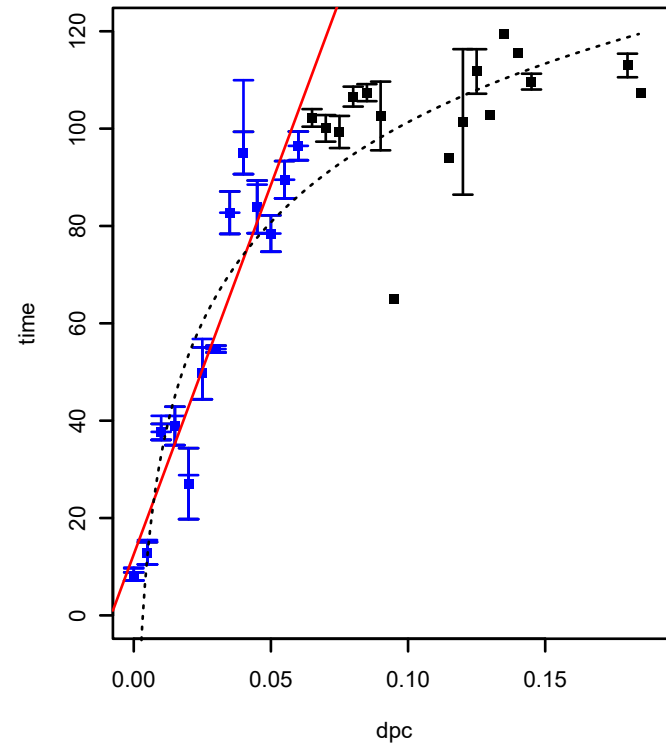**SPO2017 (COG0719) (\*HTCC2255-Basal)**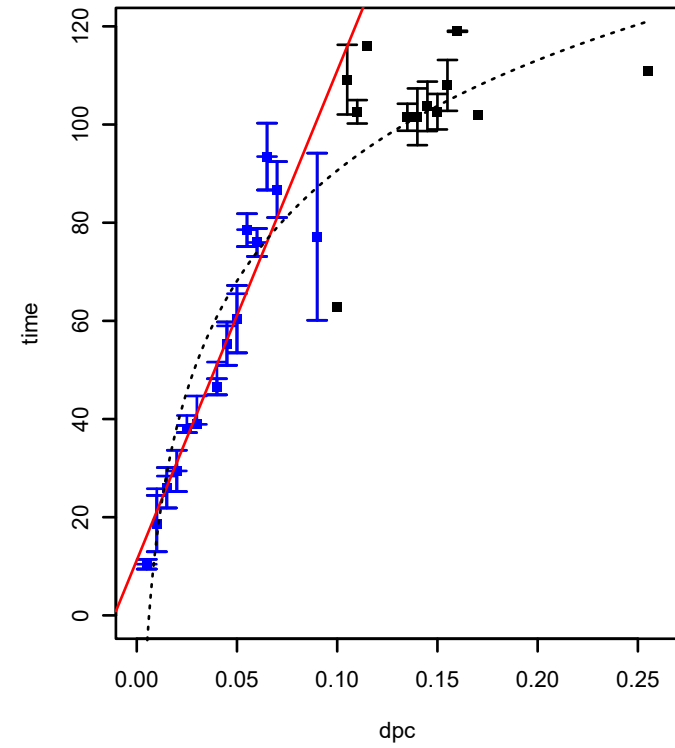**SPO0332 (COG0165) (\*HTCC2255-Basal)**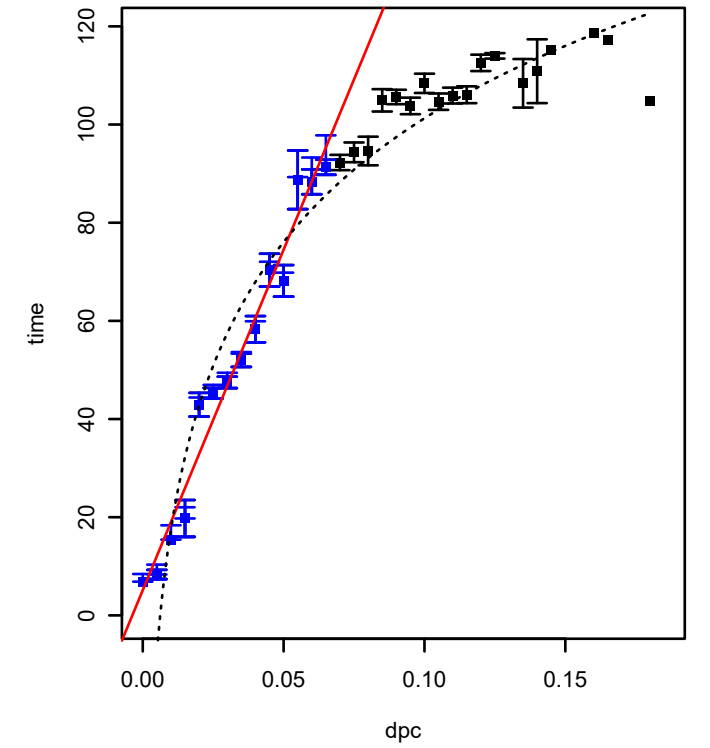

**SPO3225 (COG1270)**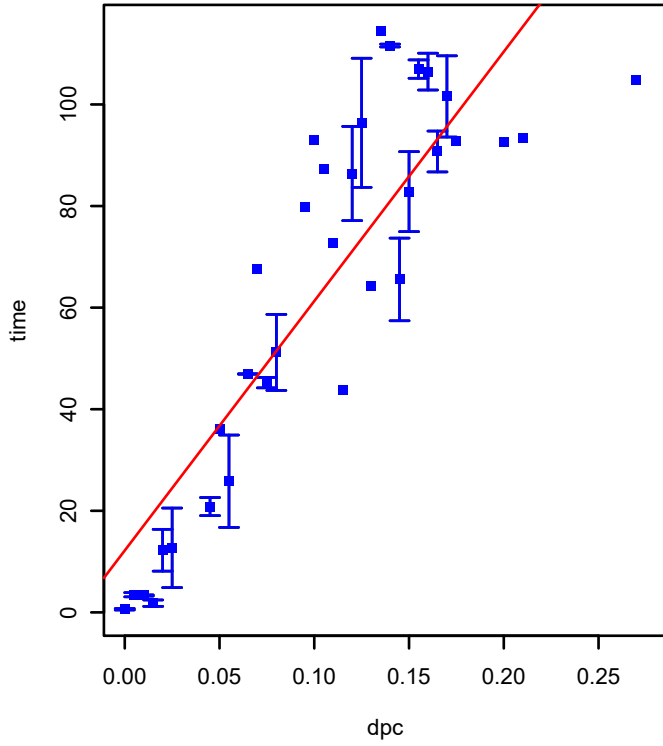**SPO0299 (COG0491) (\*HTCC2255-Basal)**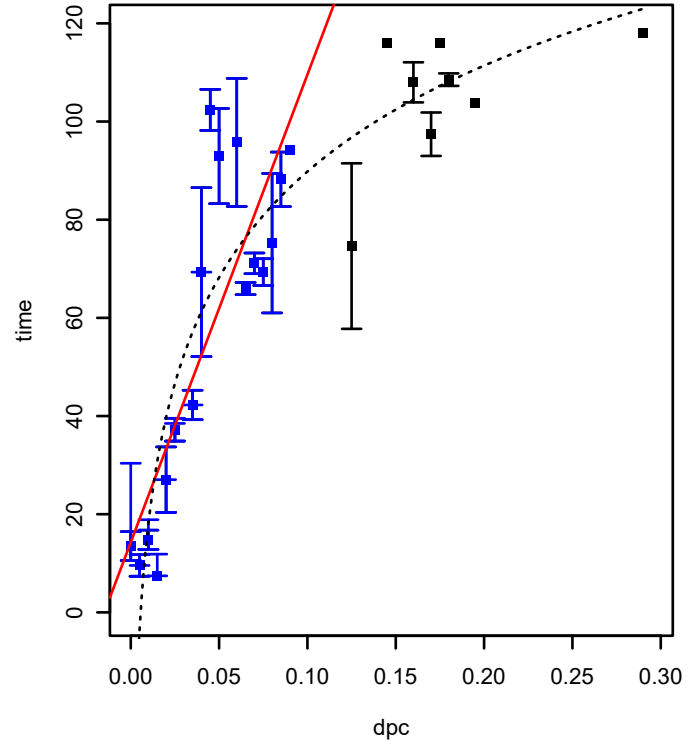**SPOA0014 (COG0220)**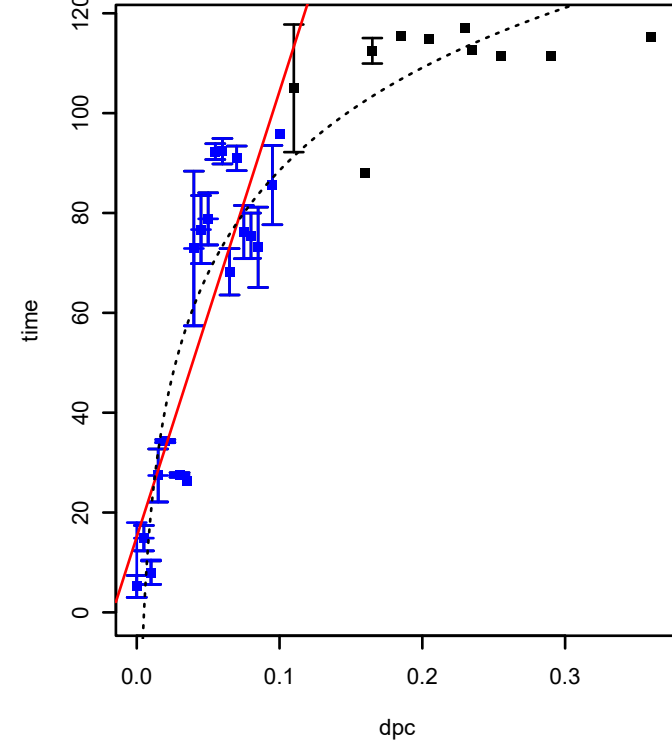**SPO1890 (COG0047) (\*HTCC2255-Basal)**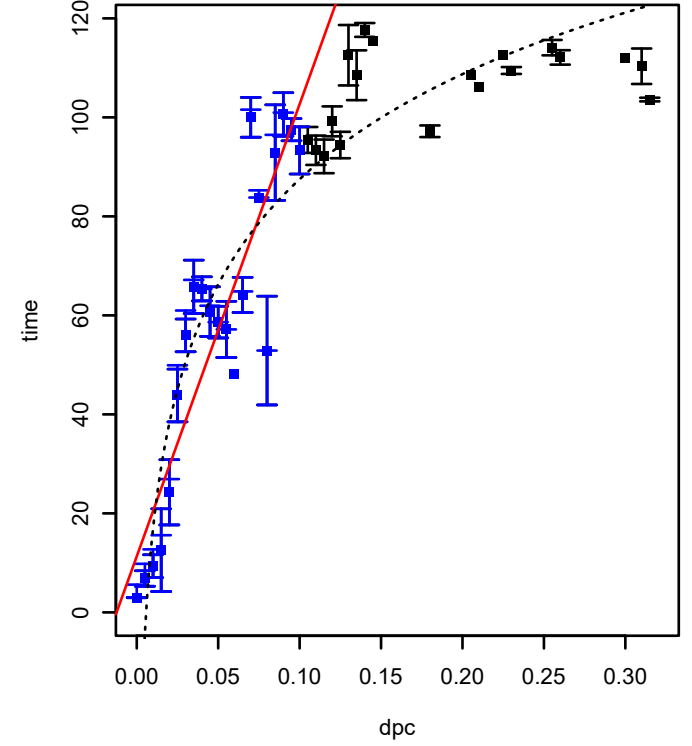**SPO0215 (COG0066) (\*HTCC2255-Basal)**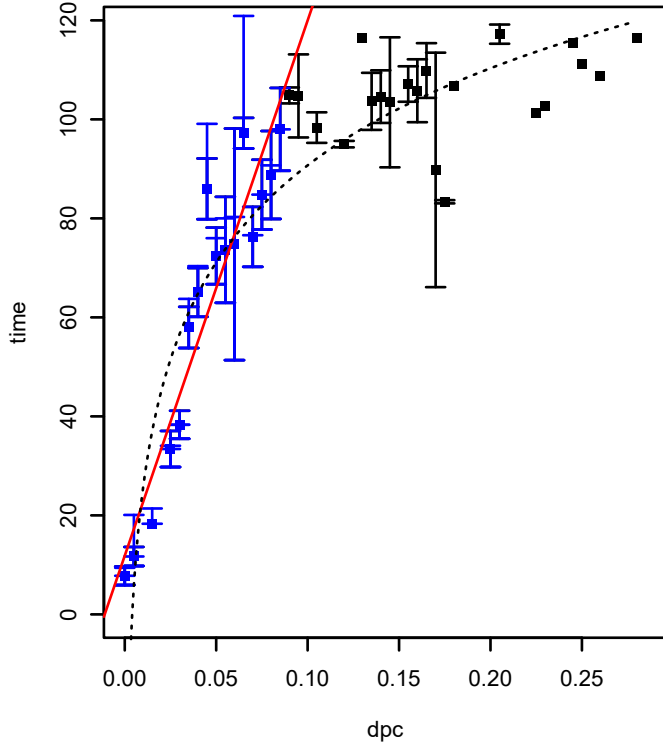**SPO0499 (COG0096)**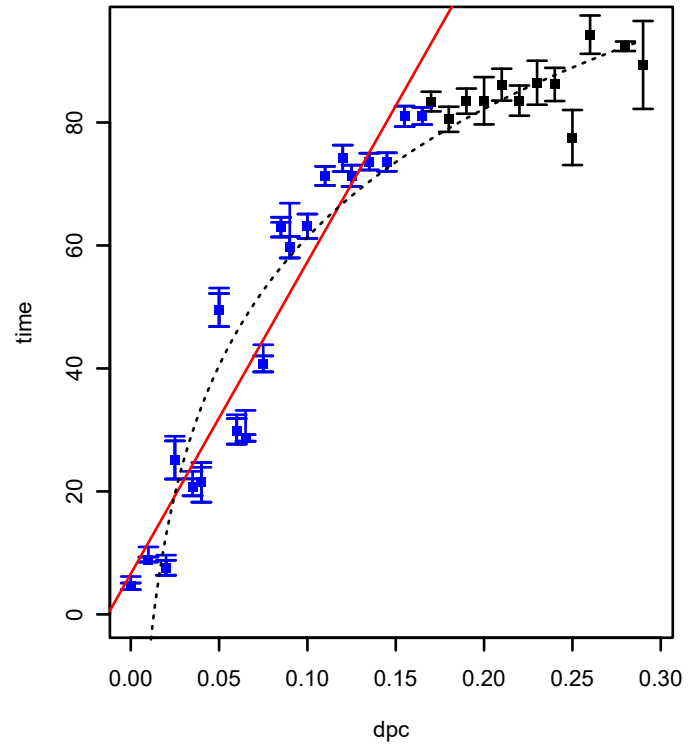**SPO0962 (COG4992) (\*HTCC2255-Basal)**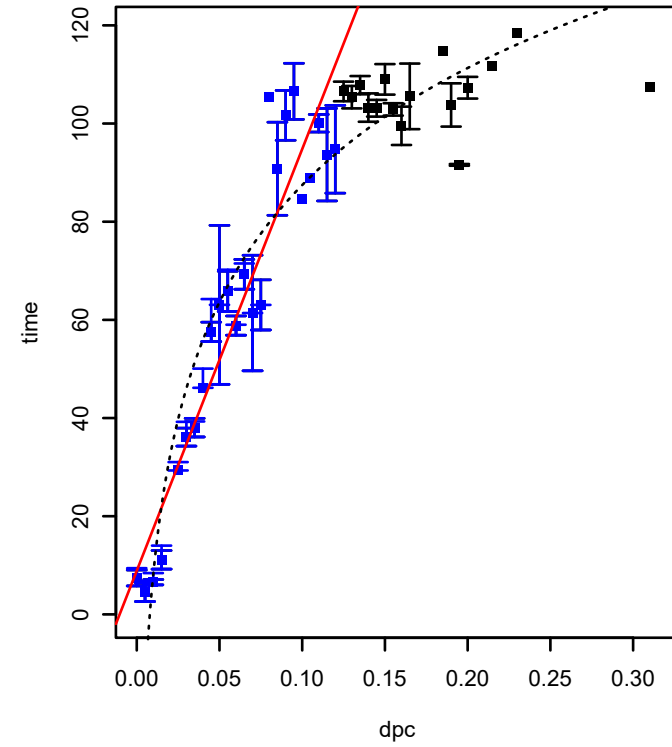**SPO3434 (COG1466) (\*HTCC2255-Basal)**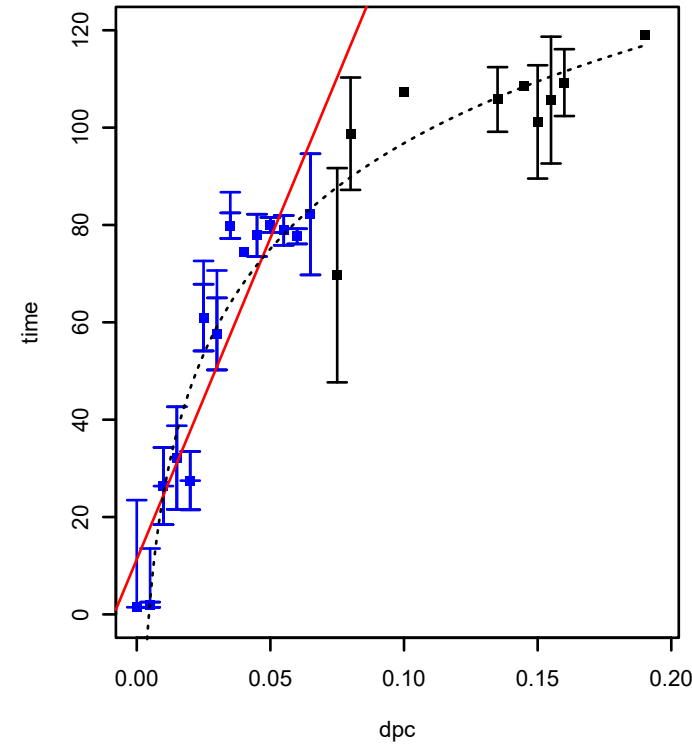

**SPO3761 (COG0024) (\*HTCC2255-Basal)**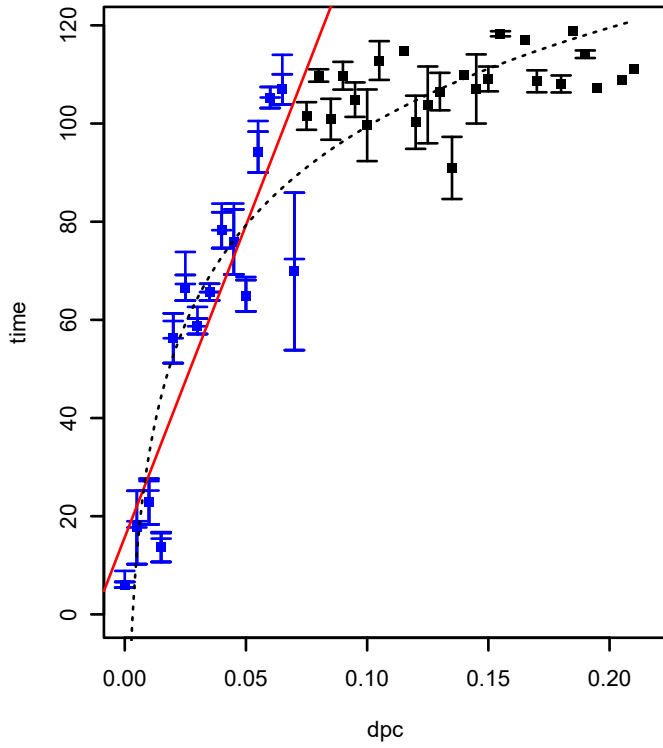**SPO2784 (COG0852) (\*HTCC2255-Basal)**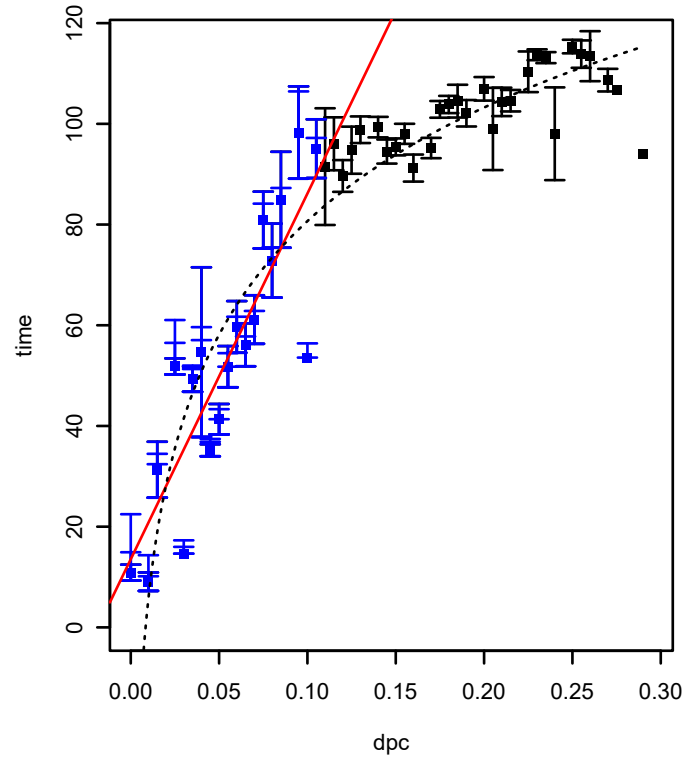**SPO0272 (COG1290)**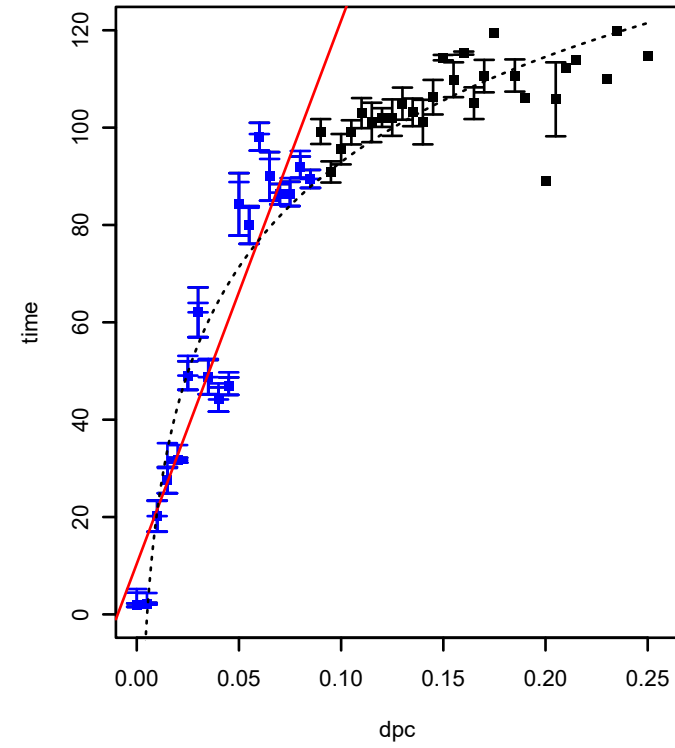**SPO2774 (COG1034) (\*HTCC2255-Basal)**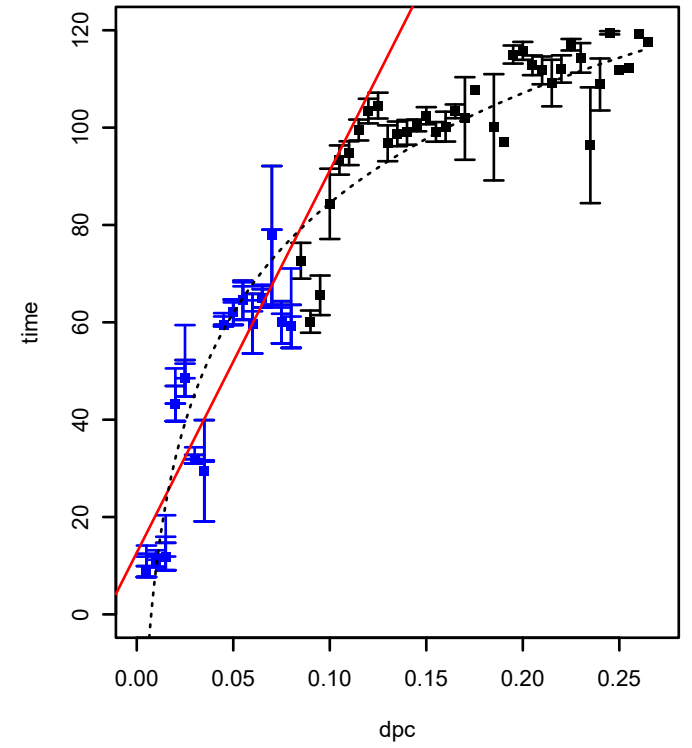**SPO3074 (COG3175)**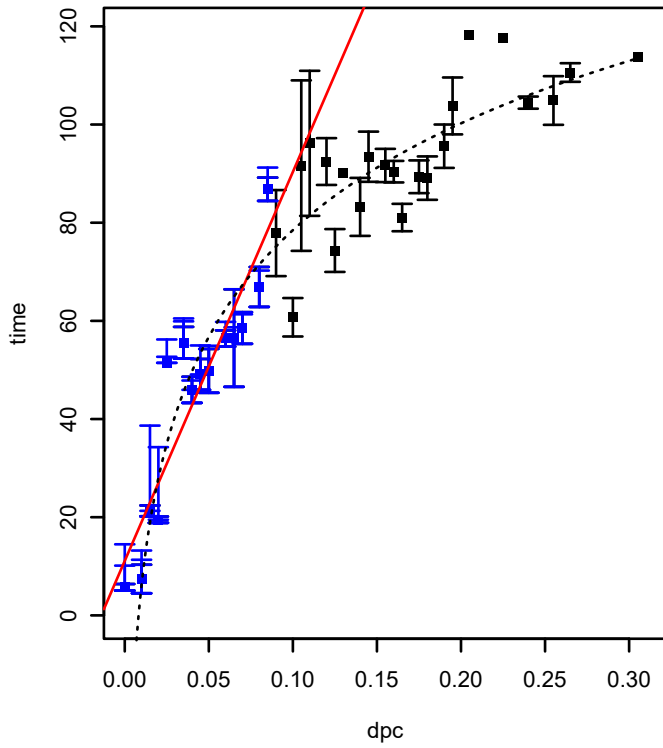**SPO1025 (COG0591)**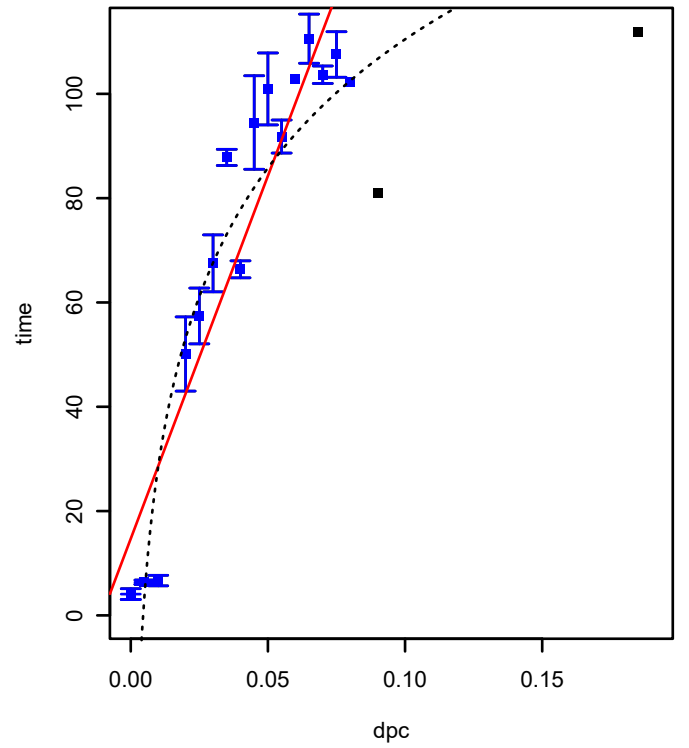**SPO1174 (COG0210)**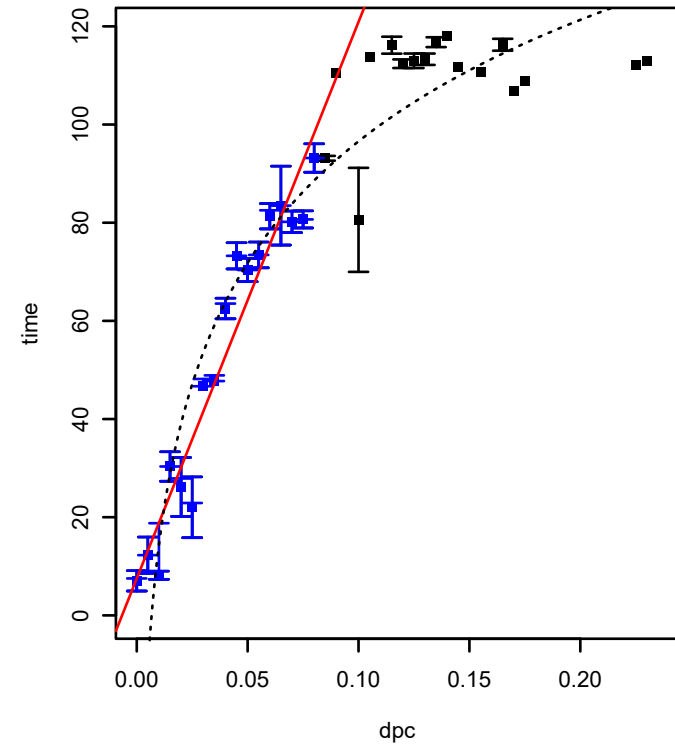**SPO2689 (COG3842) (\*HTCC2255-Basal)**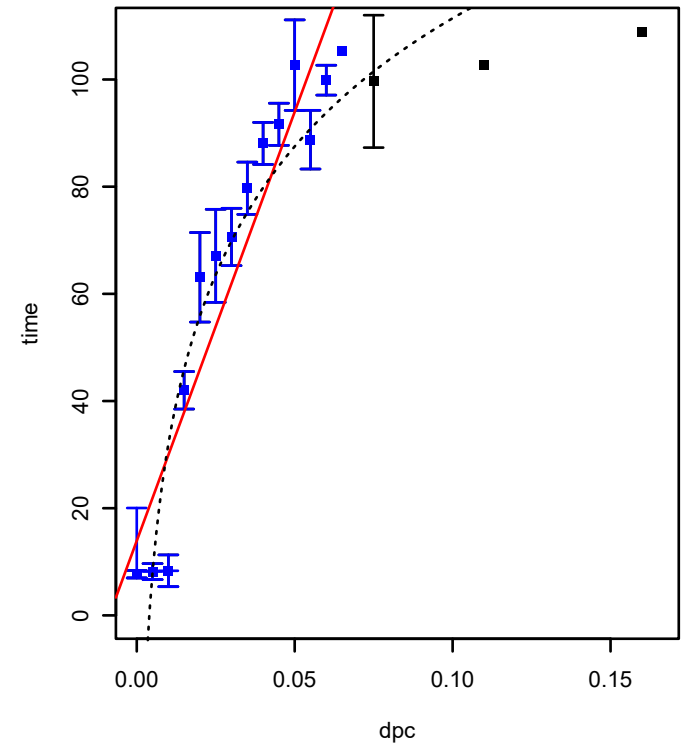

**SPO2374 (COG0042)**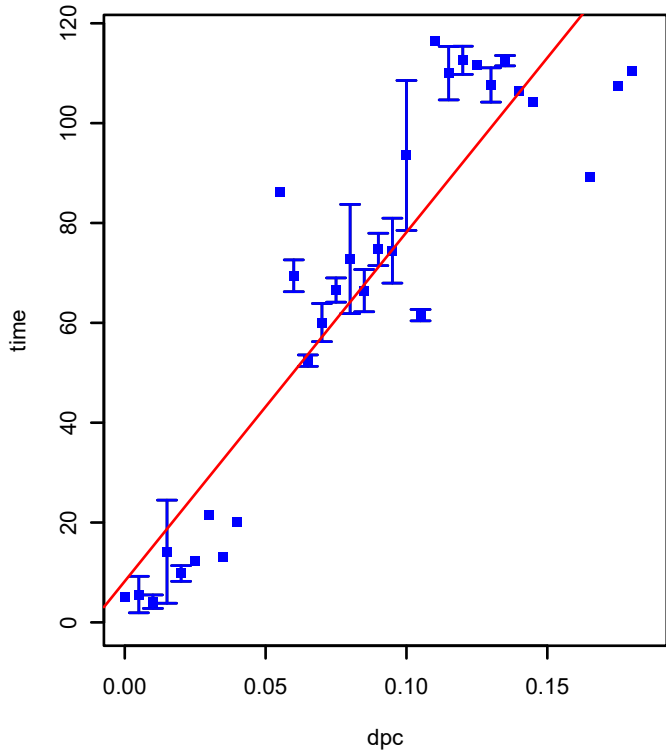**SPO1386 (COG0537)**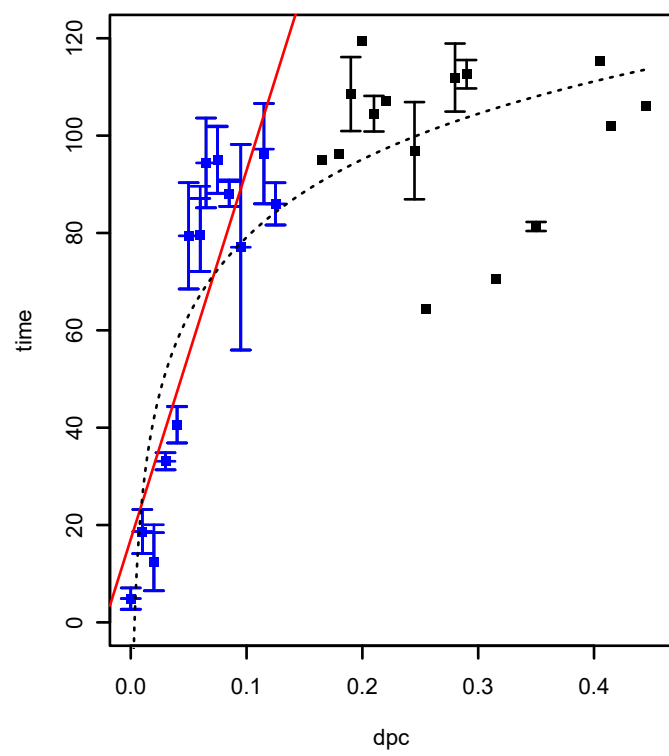**SPO3427 (COG0807) (\*HTCC2255-Basal)**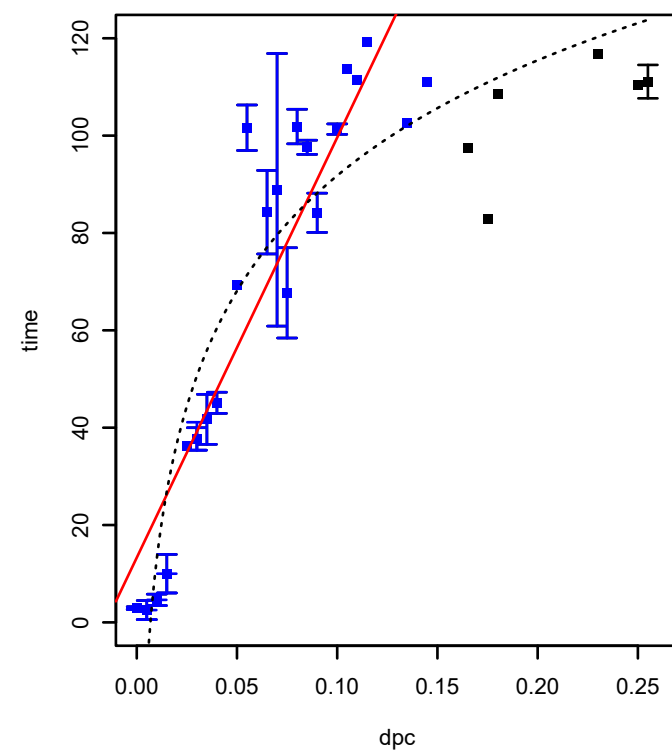**SPO3288 (COG1178)**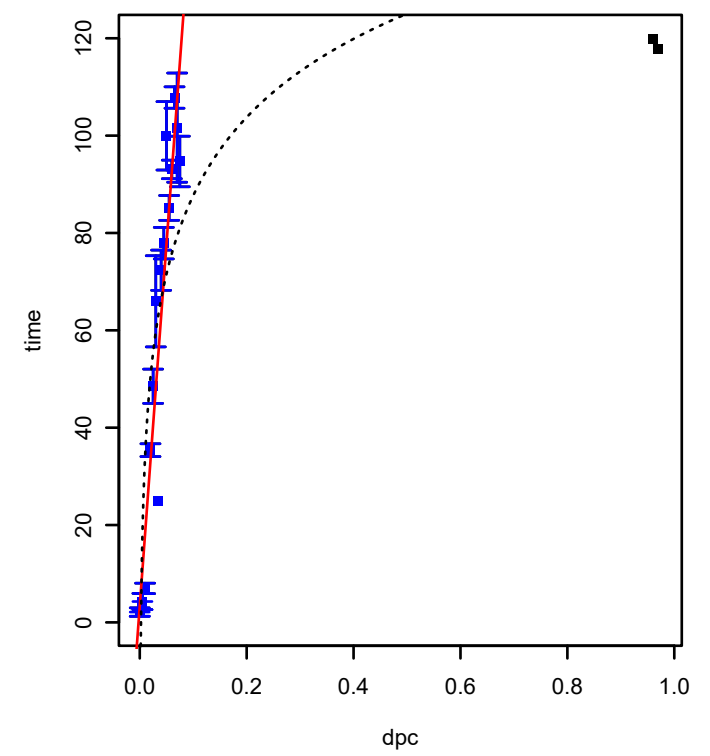**SPO3079 (COG0550)**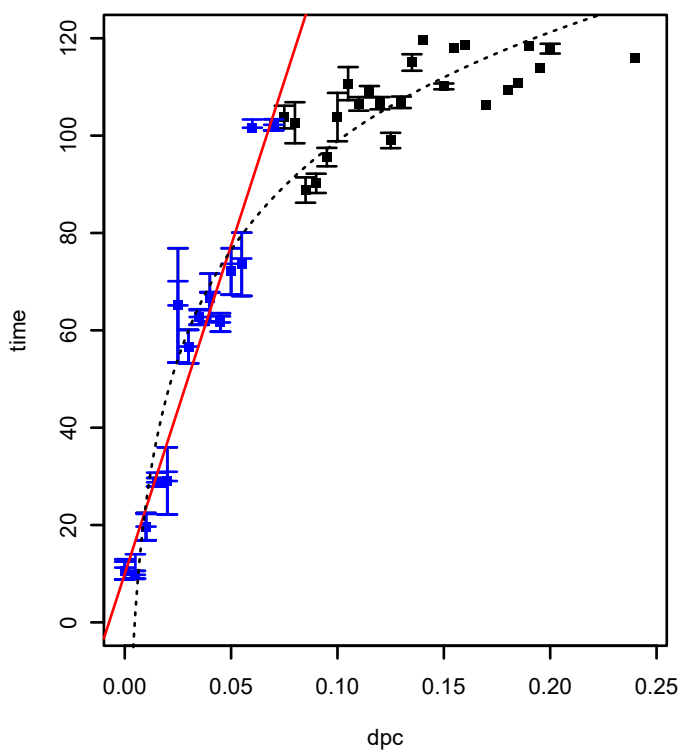**SPO0360 (COG1053)**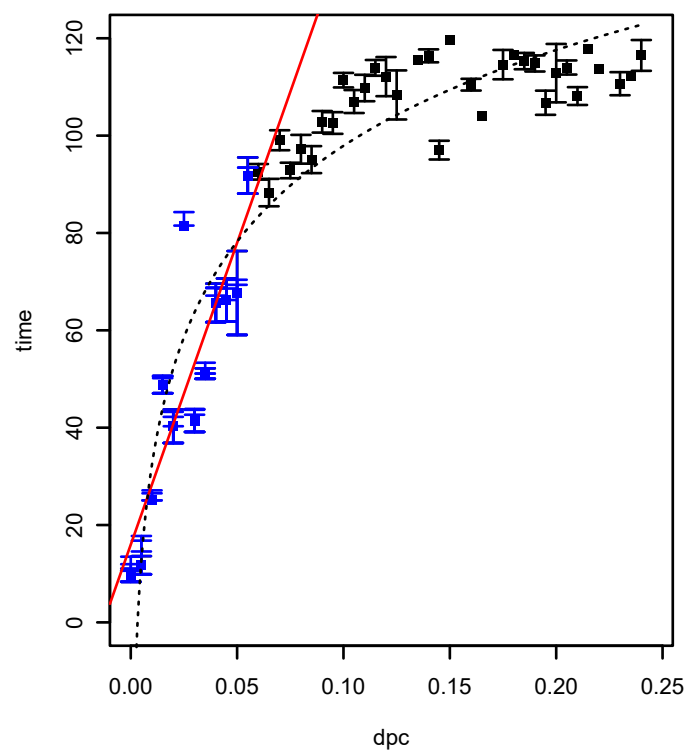**SPO0083 (COG0349) (\*HTCC2255-Basal)**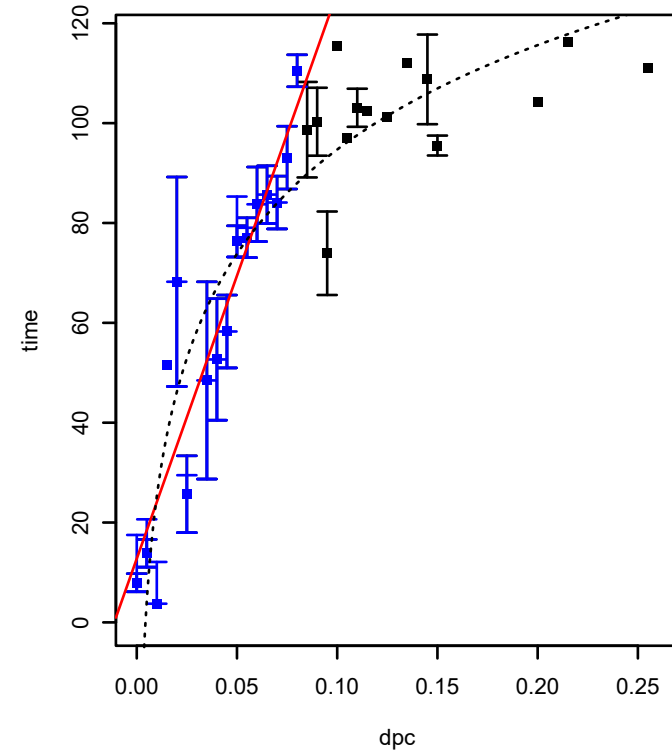**SPO3010 (COG4230)**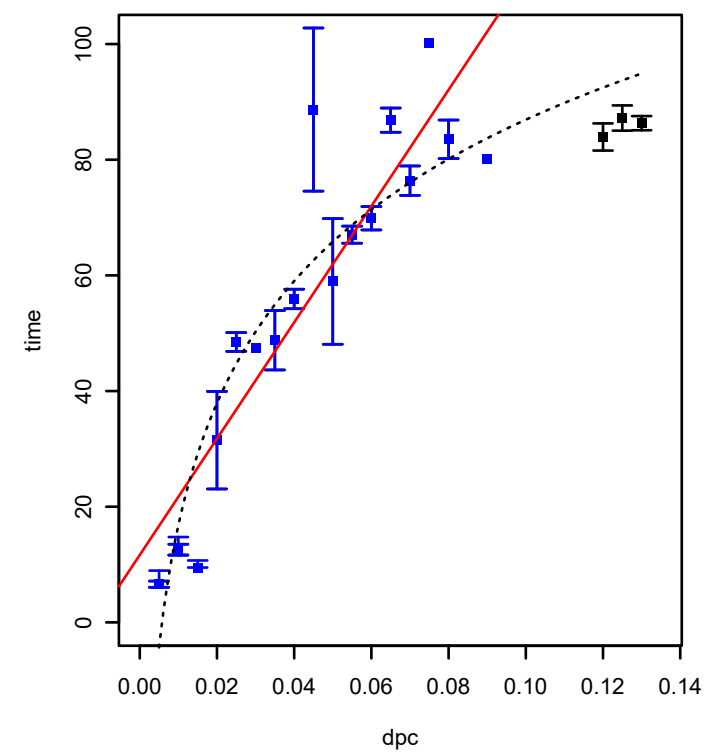

**SPO3022 (COG0525)**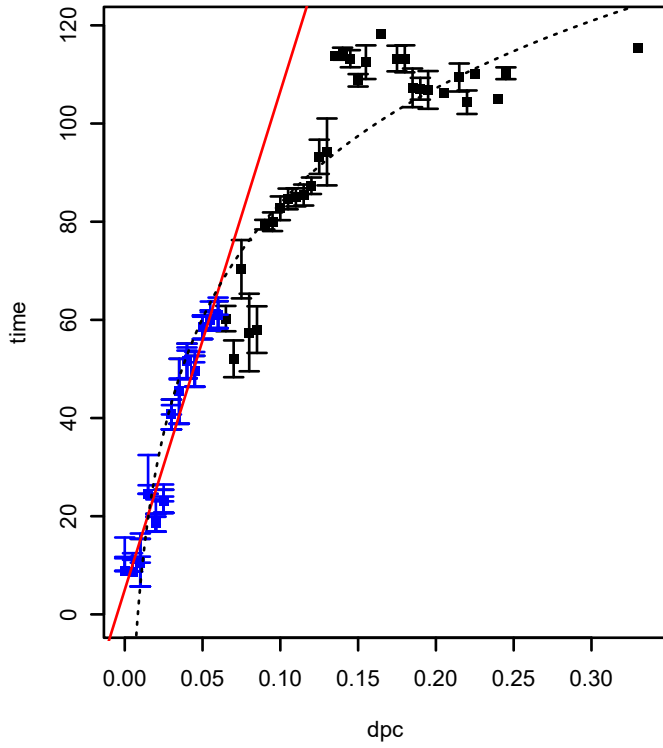**SPO3212 (COG0328)**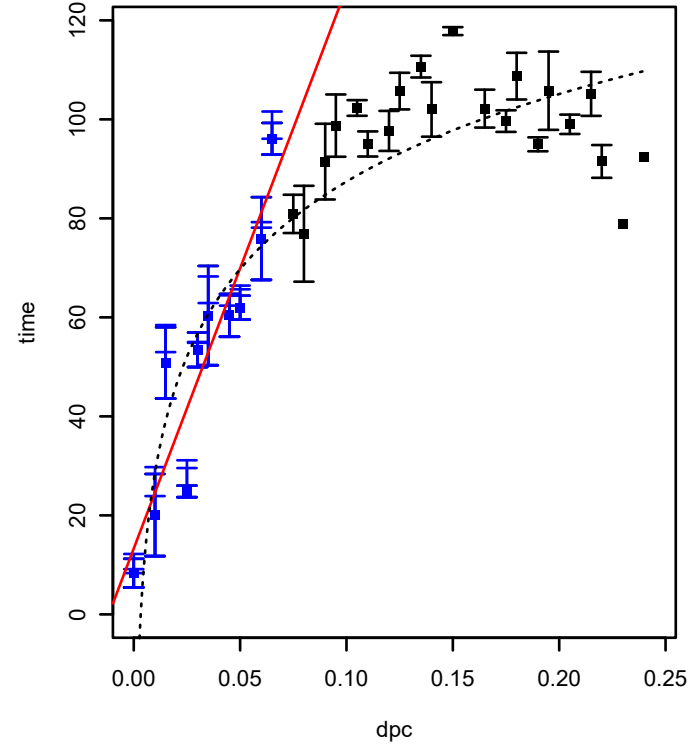**SPO3556 (COG0329) (\*HTCC2255-Basal)**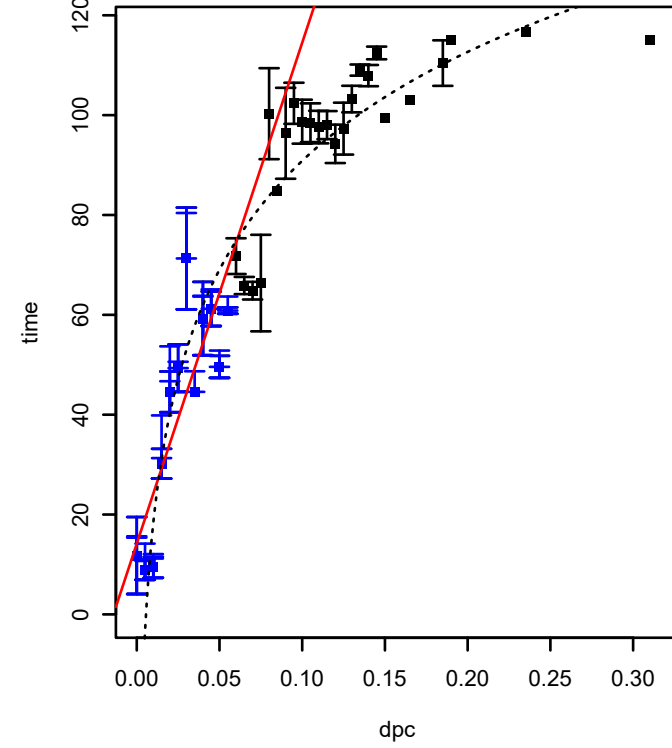**SPO3658 (COG1686) (\*HTCC2255-Basal)**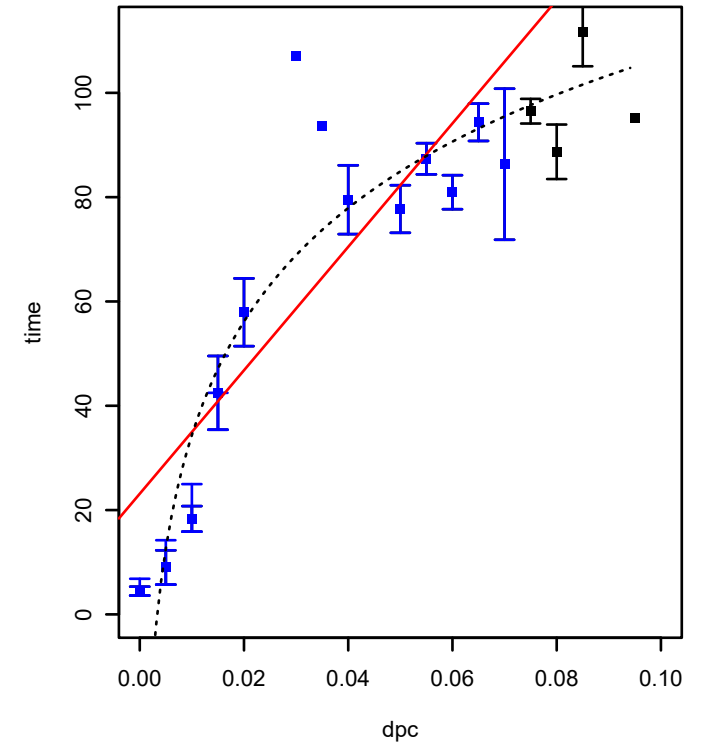**SPO0912 (COG0073) (\*HTCC2255-Basal)**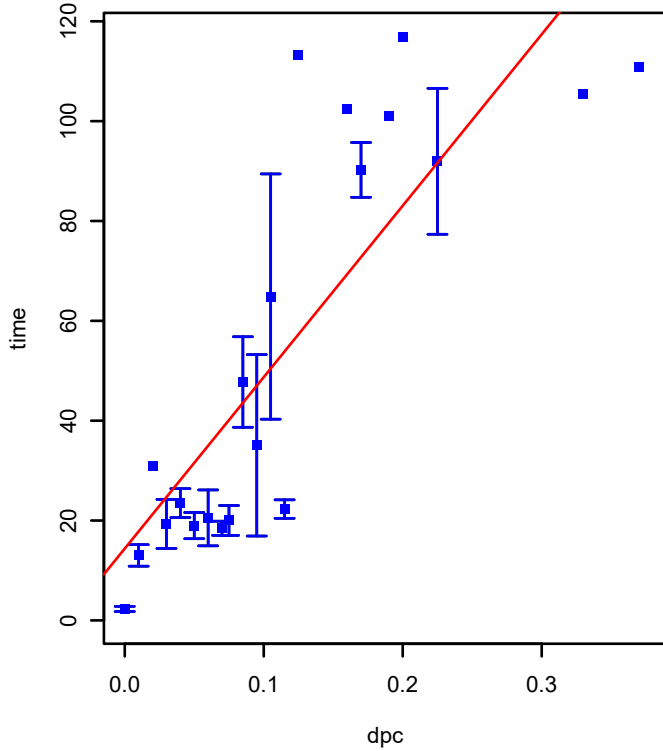**SPO0405 (COG2087)**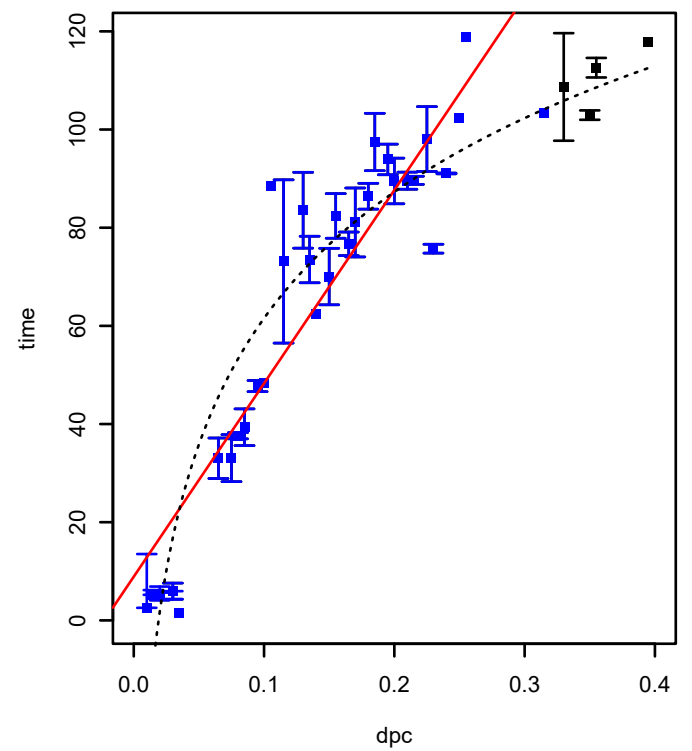**SPO0219 (COG0799)**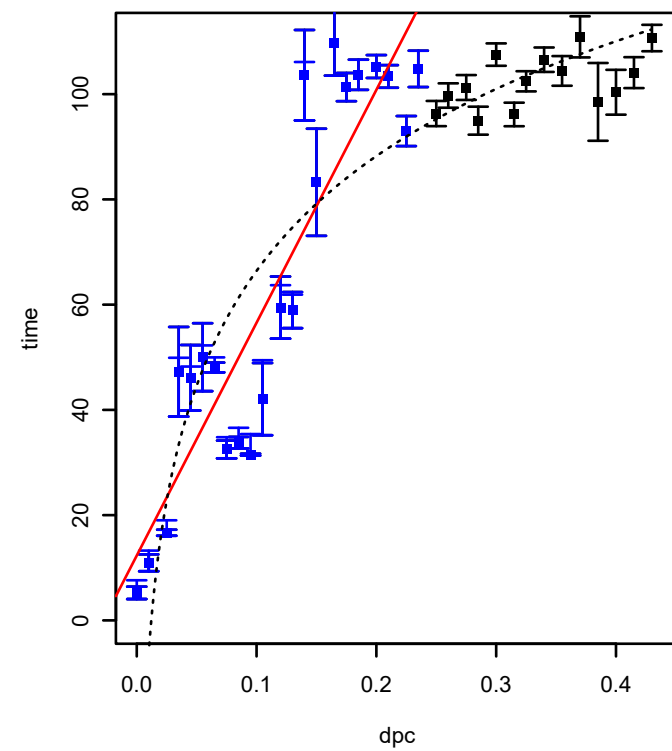**SPO1309 (COG4103) (\*HTCC2255-Basal)**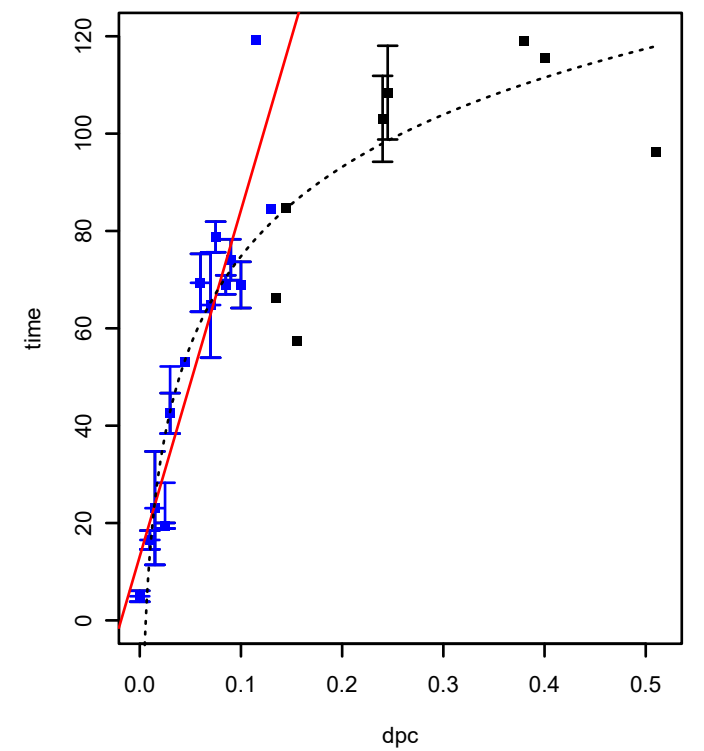

**SPO2688 (COG0496) (\*HTCC2255-Basal)**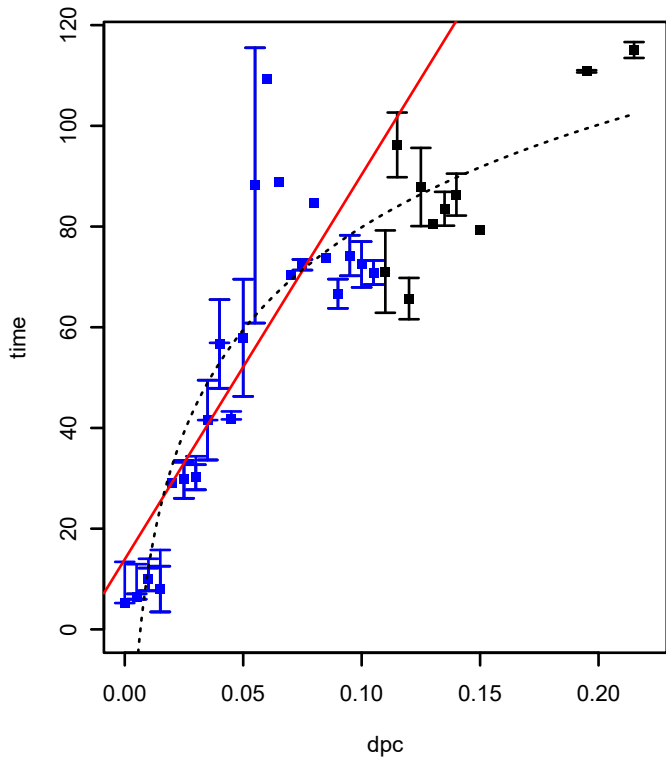**SPO3233 (COG0711) (\*HTCC2255-Basal)**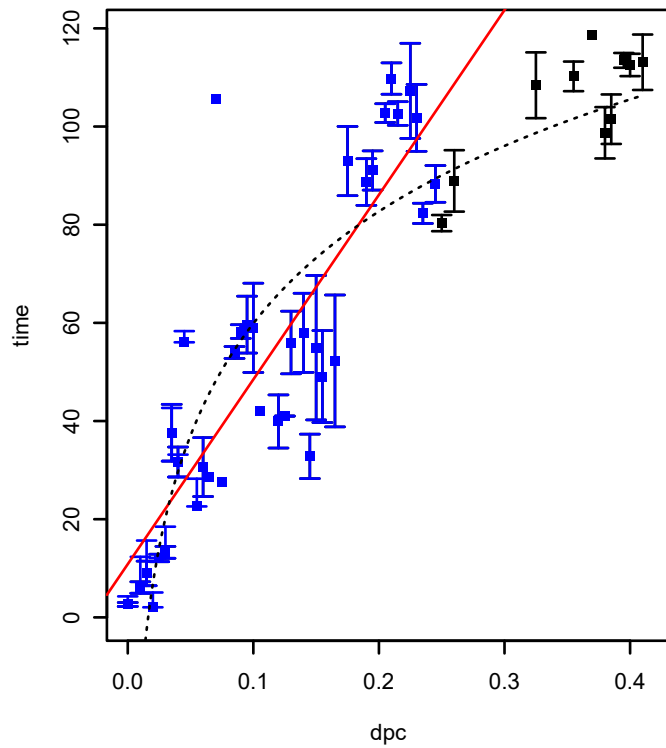**SPO3806 (COG0691) (\*HTCC2255-Basal)**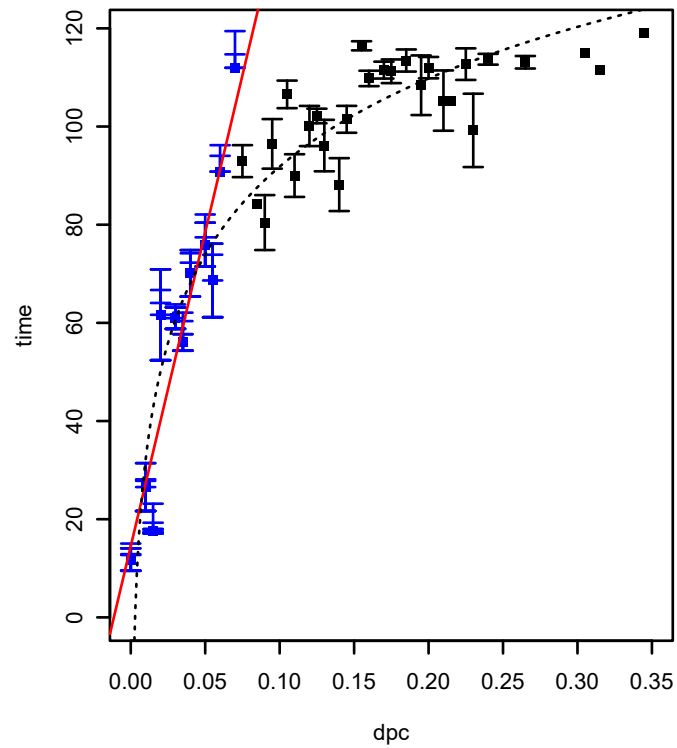**SPO2767 (COG0839) (\*HTCC2255-Basal)**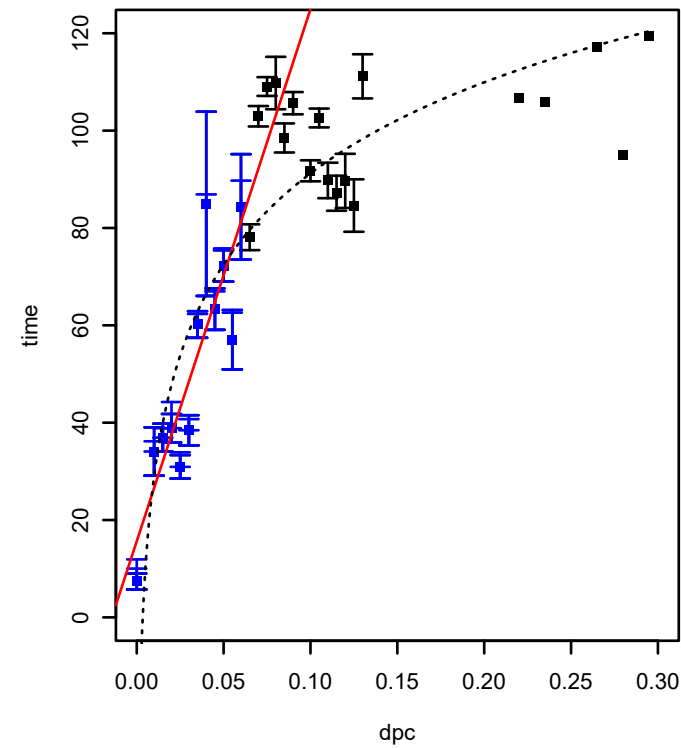**SPO3880 (COG5405) (\*HTCC2255-Basal)**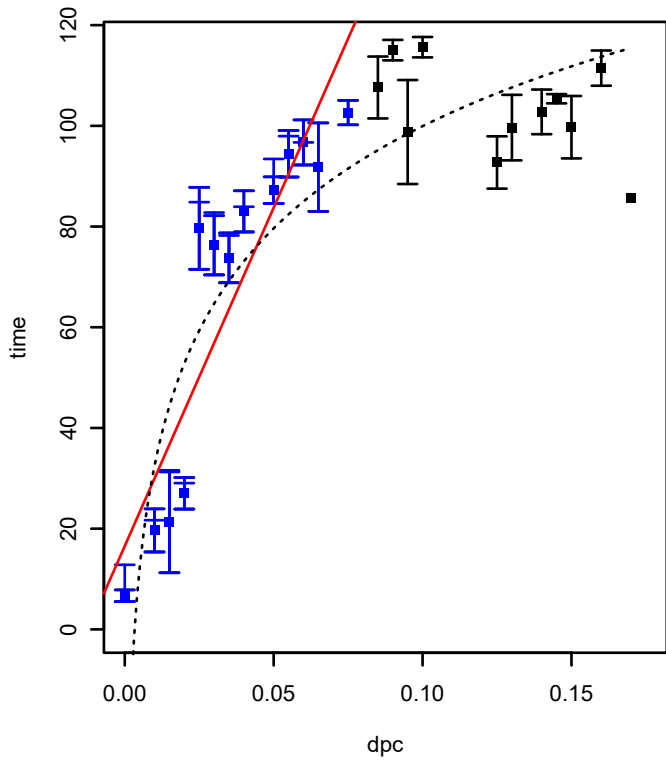**SPO0416 (COG0772) (\*HTCC2255-Basal)**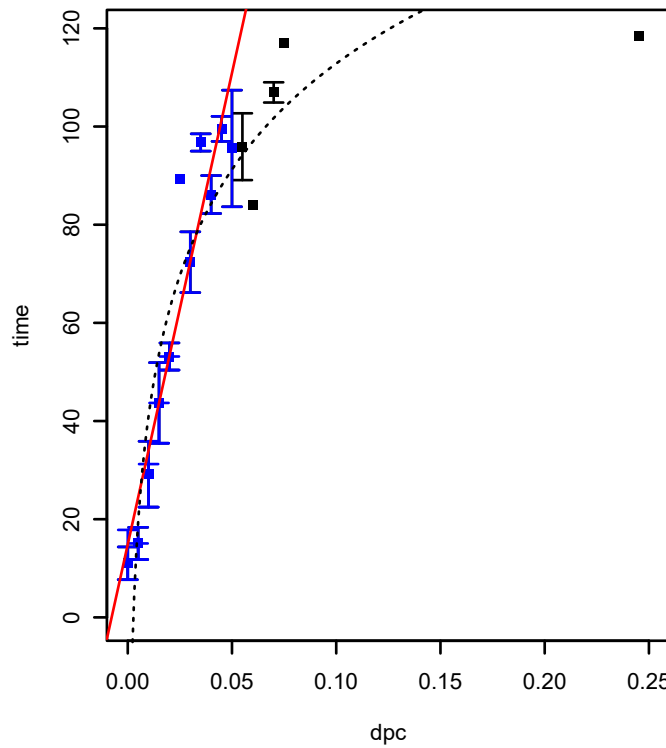**SPO1688 (COG2050) (\*HTCC2255-Basal)**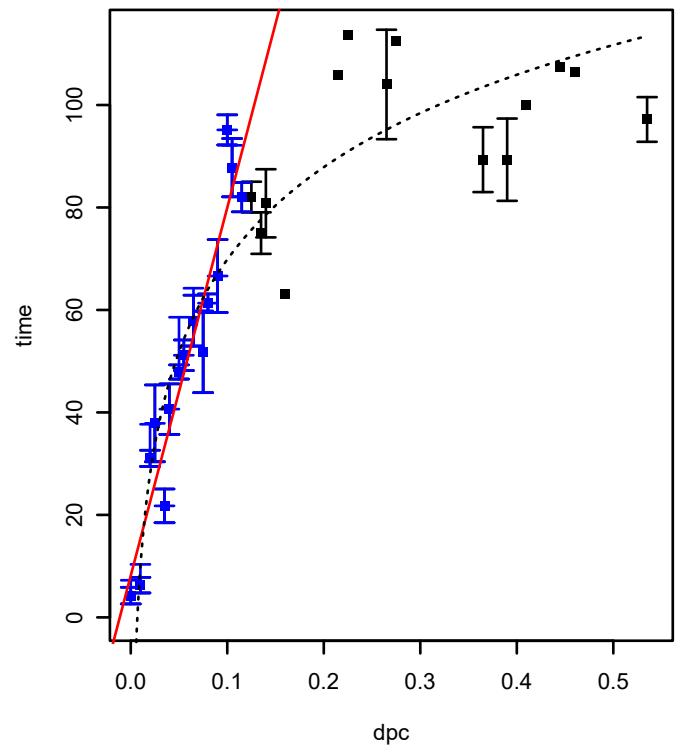**SPO2742 (COG0084) (\*HTCC2255-Basal)**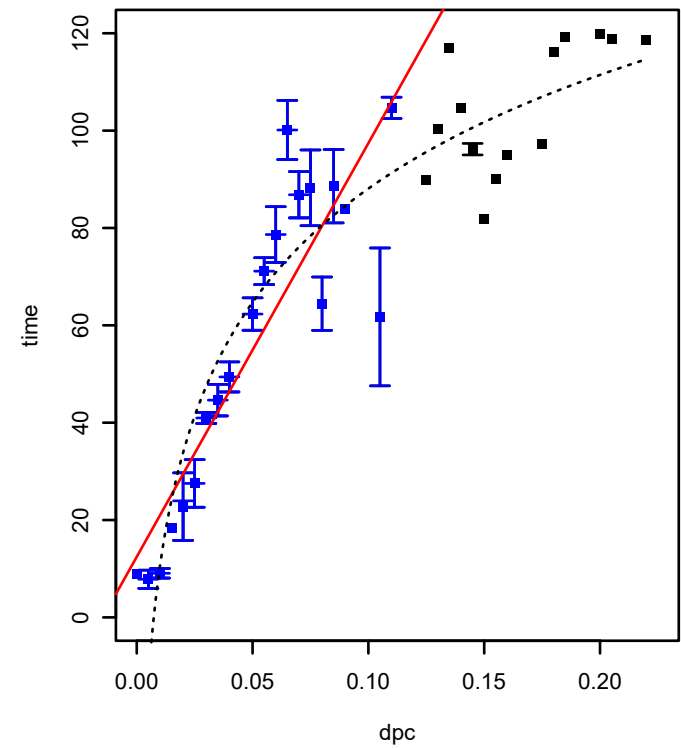



**SPO3888 (COG1952) (\*HTCC2255-Basal)**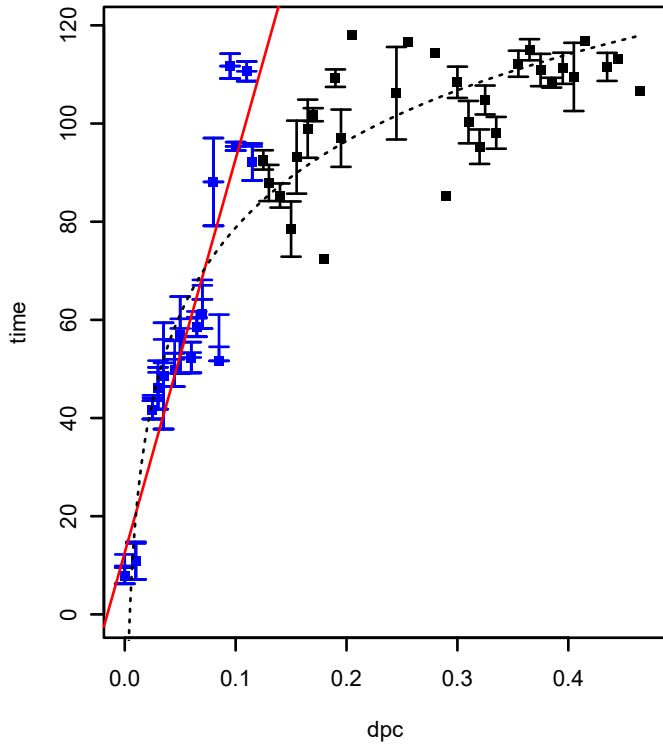**SPO0813 (COG1304) (\*HTCC2255-Basal)**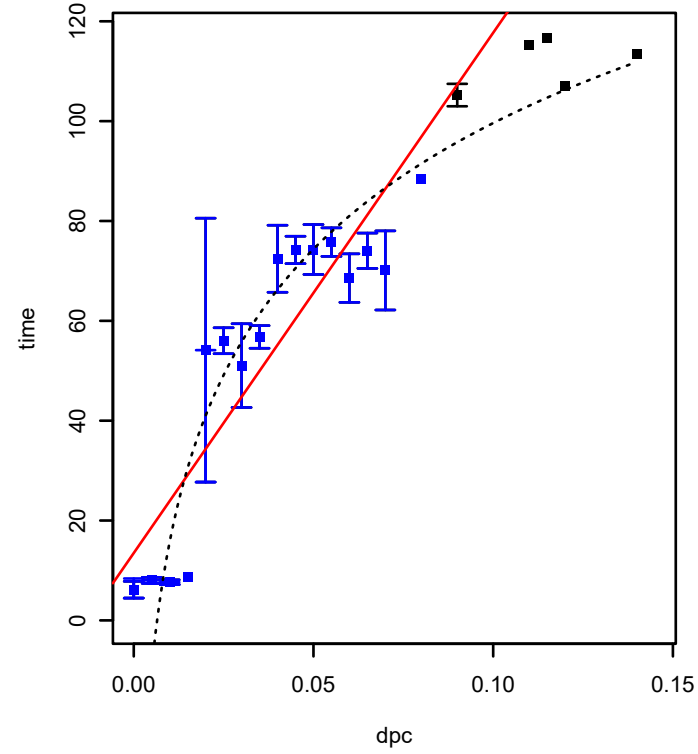**SPO0894 (COG5481) (\*HTCC2255-Basal)**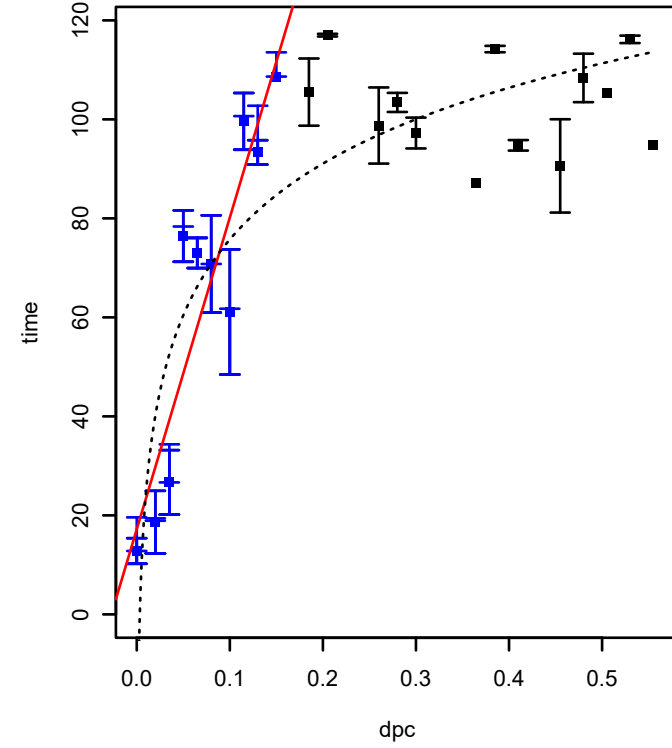**SPO3236 (COG0356)**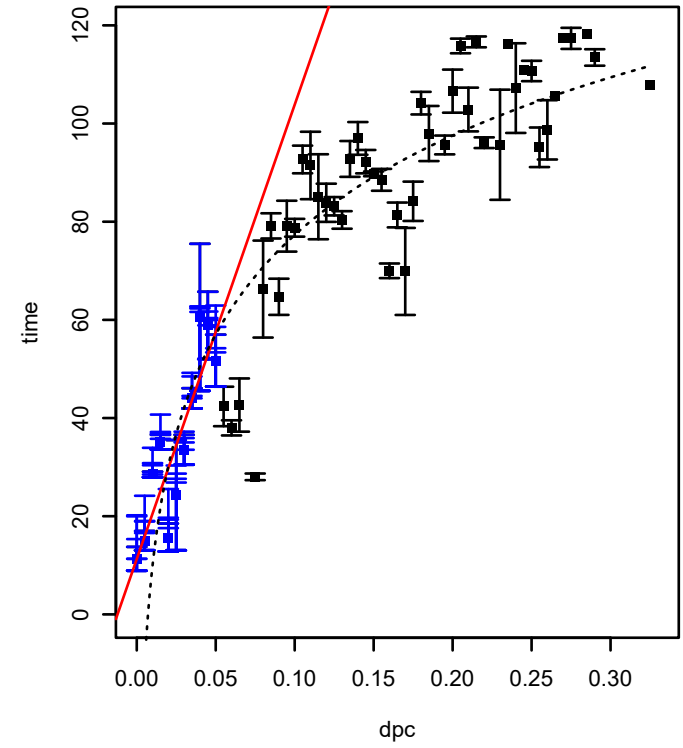**SPO2519 (NA) (\*HTCC2255-Basal)**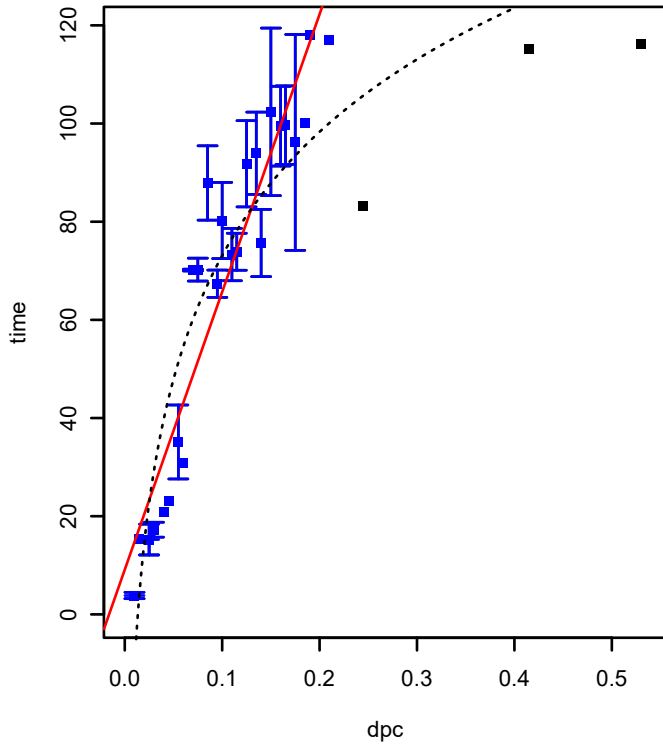**SPO2016 (NA)**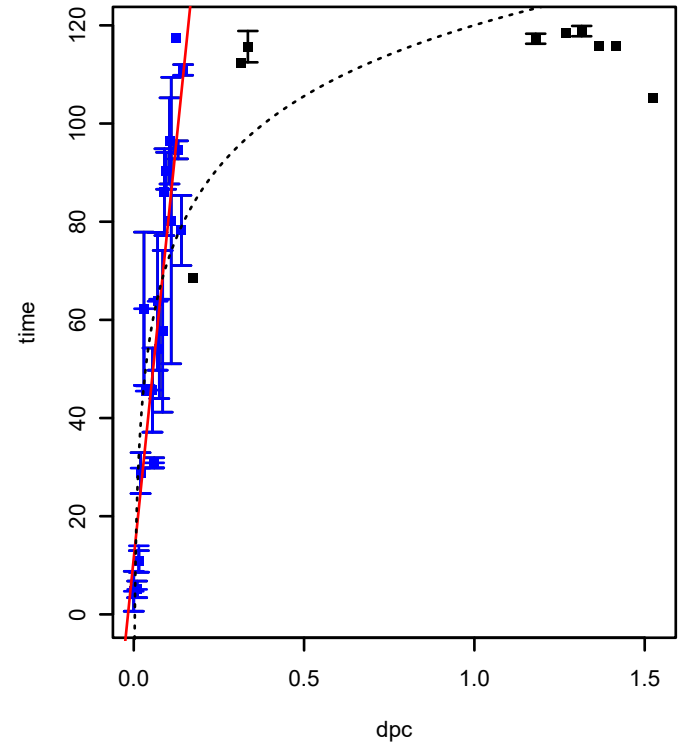**SPO3165 (COG0712) (\*HTCC2255-Basal)**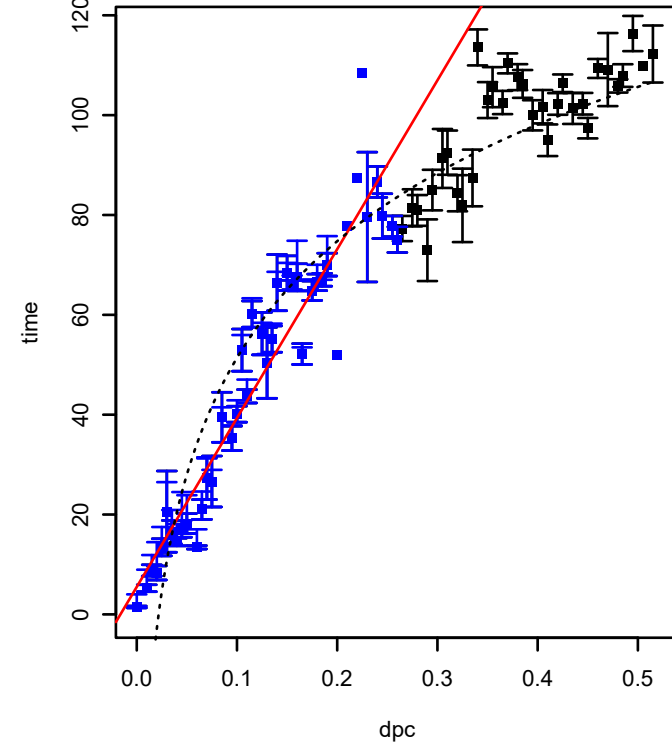**SPO0812 (COG1825)**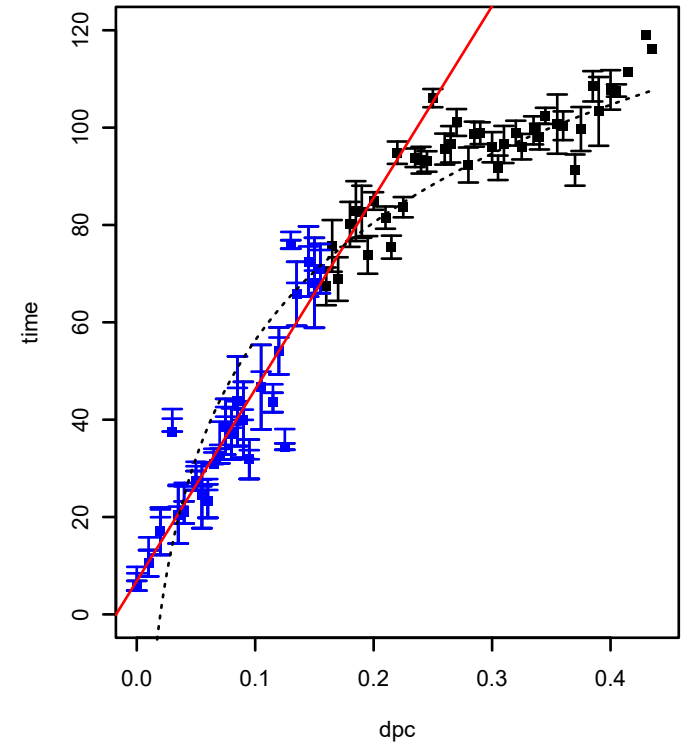

**SPO0072 (NA) (\*HTCC2255-Basal)**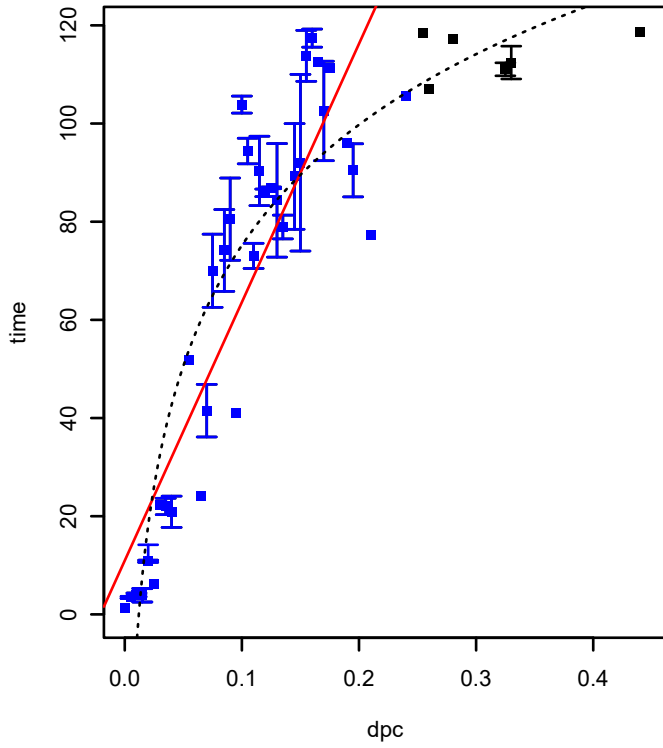**SPO0779 (COG0036)**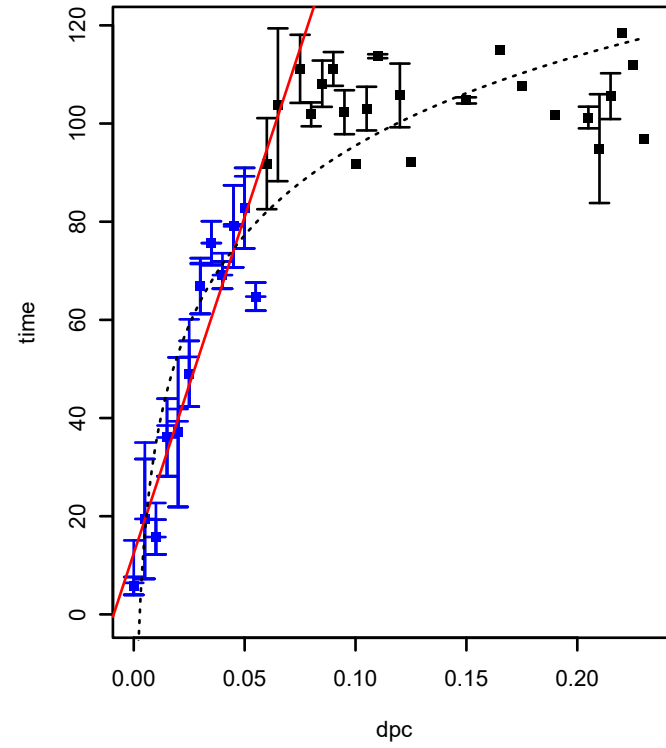**SPO3630 (COG0382) (\*HTCC2255-Basal)**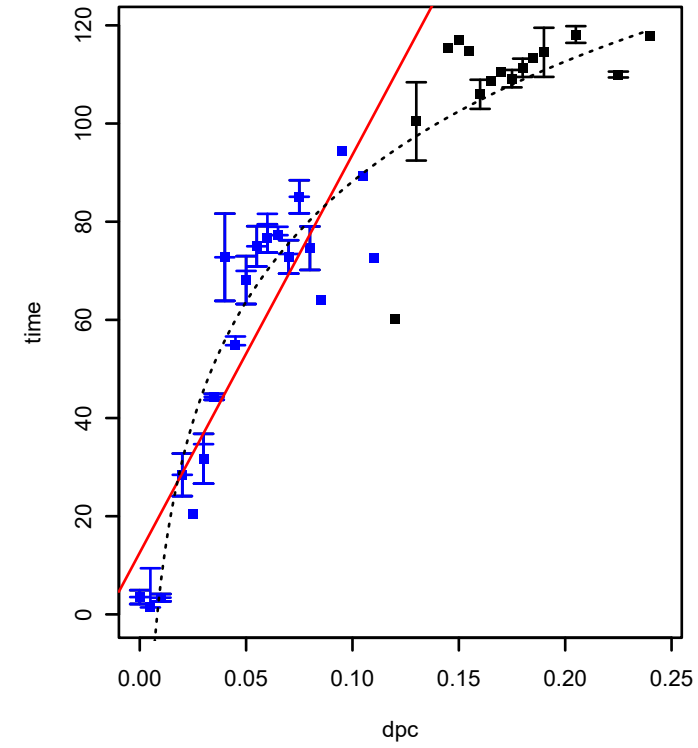**SPO0512 (COG0203)**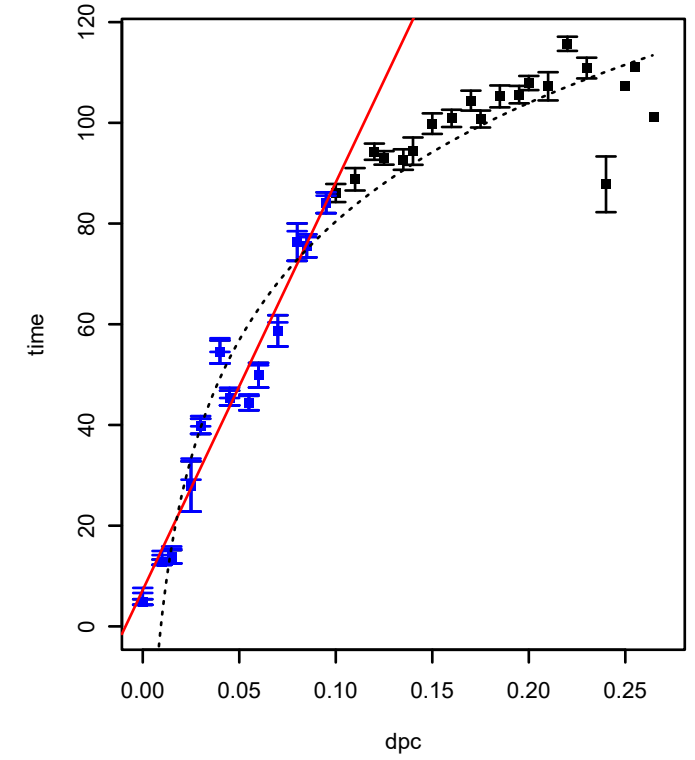**SPO1634 (COG0703) (\*HTCC2255-Basal)**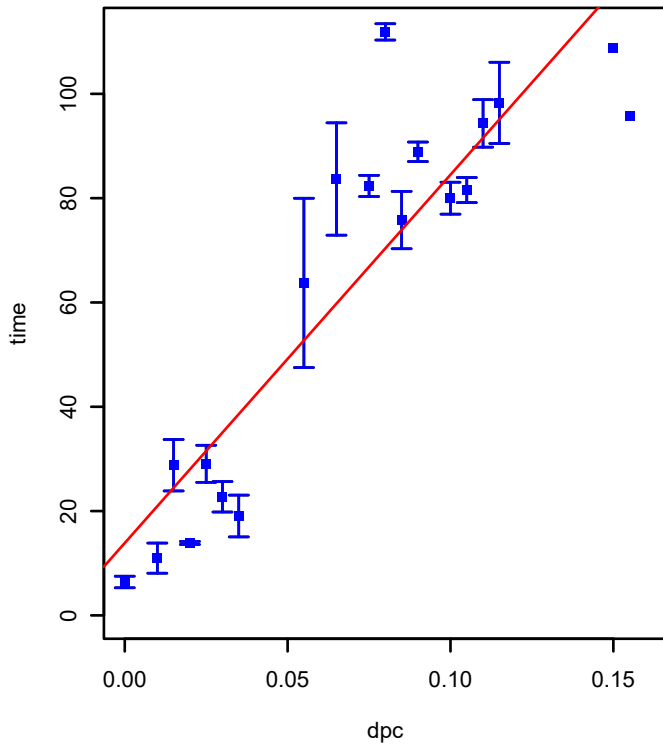**SPO0415 (COG0111) (\*HTCC2255-Basal)**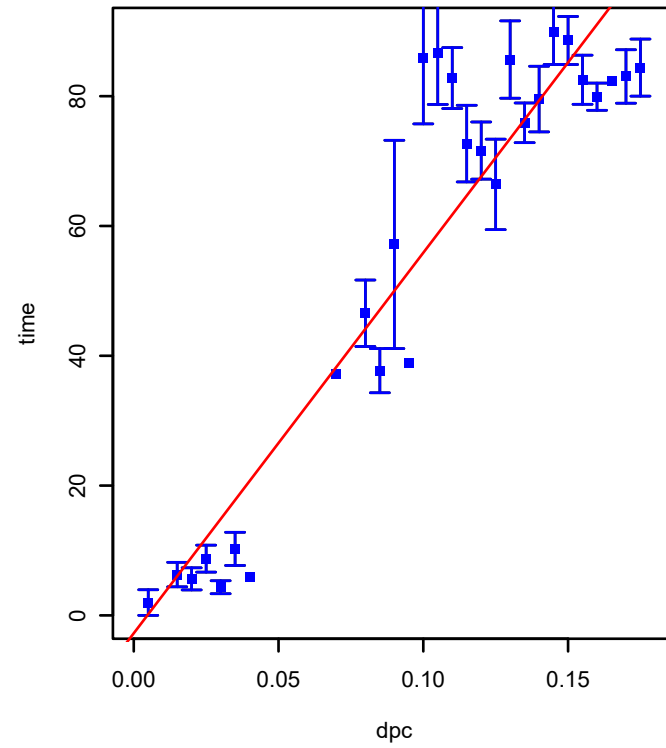**SPO1750 (COG0568) (\*HTCC2255-Basal)**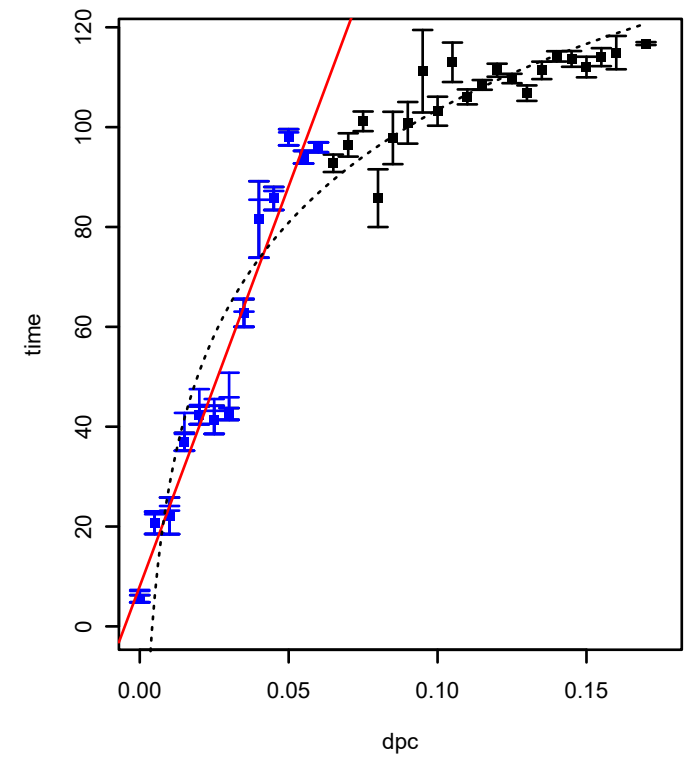**SPO3870 (COG3178)**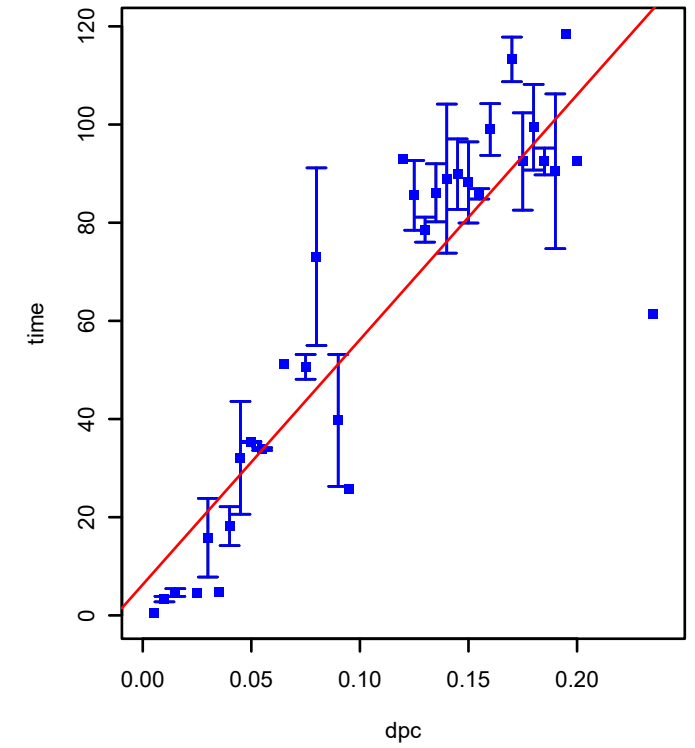

**SPO3817 (COG0777) (\*HTCC2255-Basal)**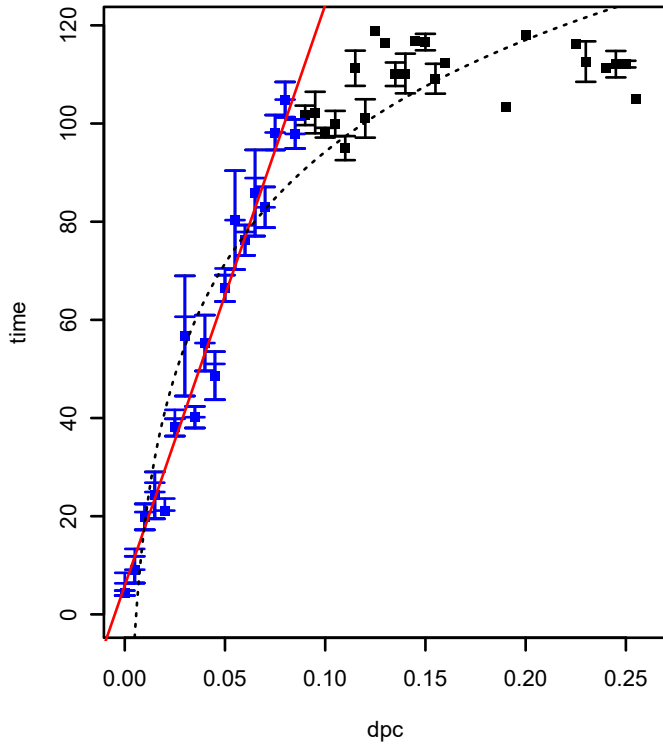**SPO3162 (COG0055)**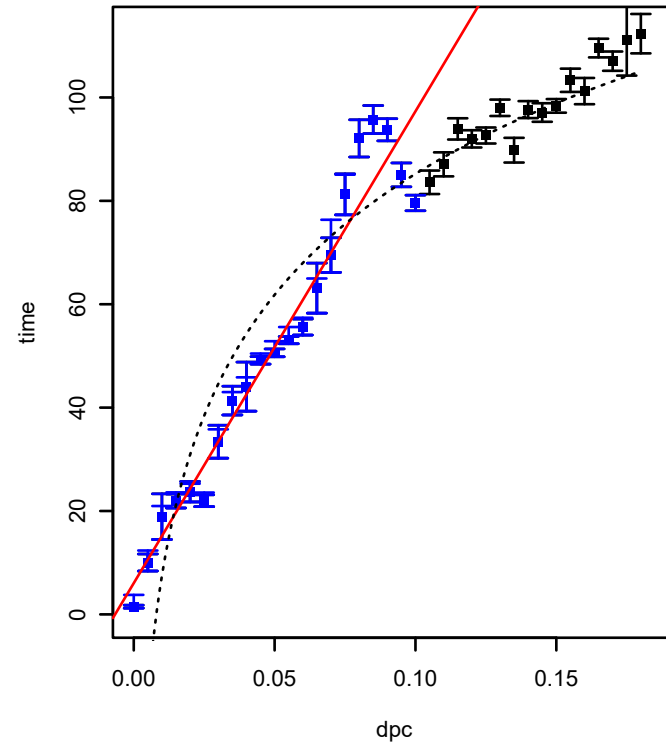**SPO3219 (COG0242) (\*HTCC2255-Basal)**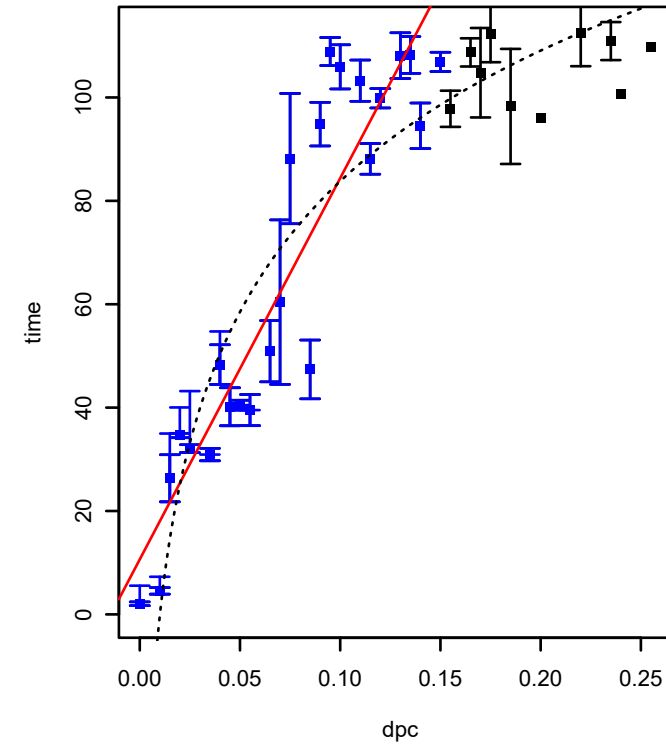**SPO2089 (COG0042) (\*HTCC2255-Basal)**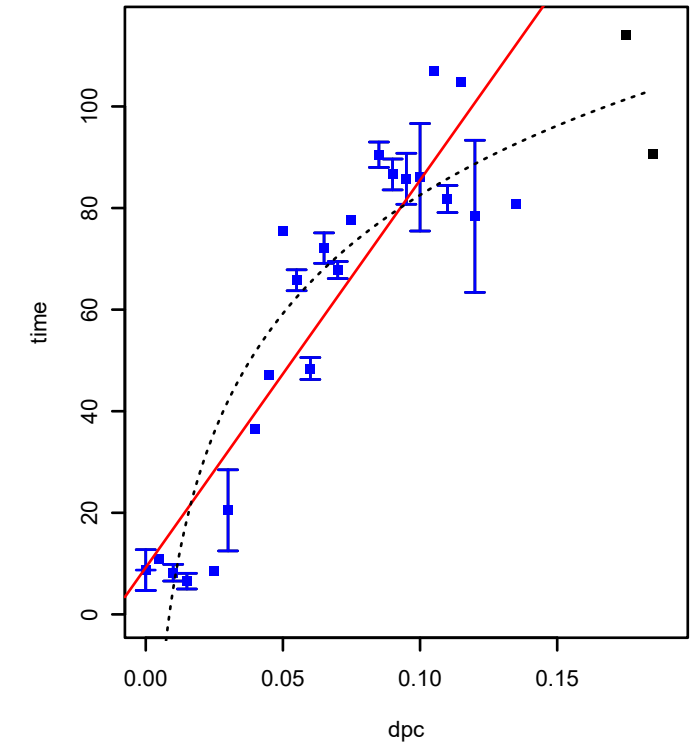**SPO2494 (COG0332) (\*HTCC2255-Basal)**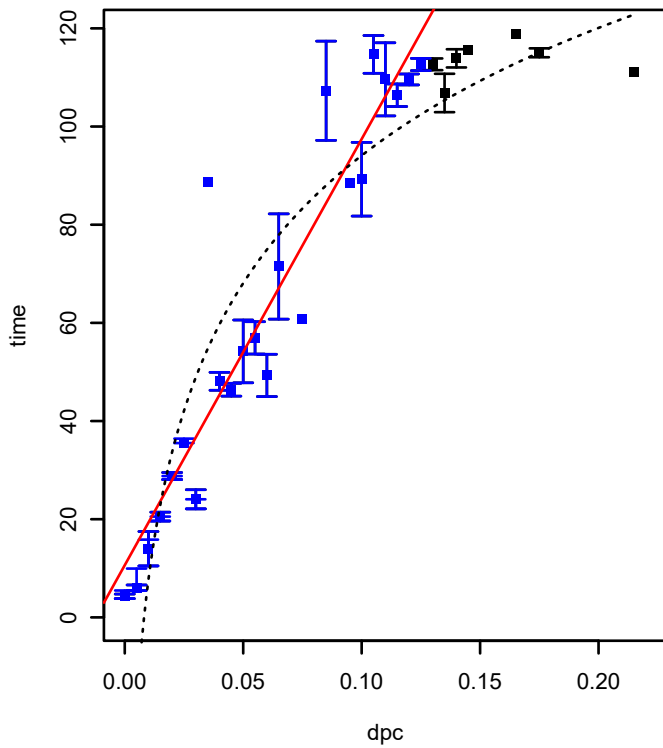**SPO2636 (COG3749) (\*HTCC2255-Basal)**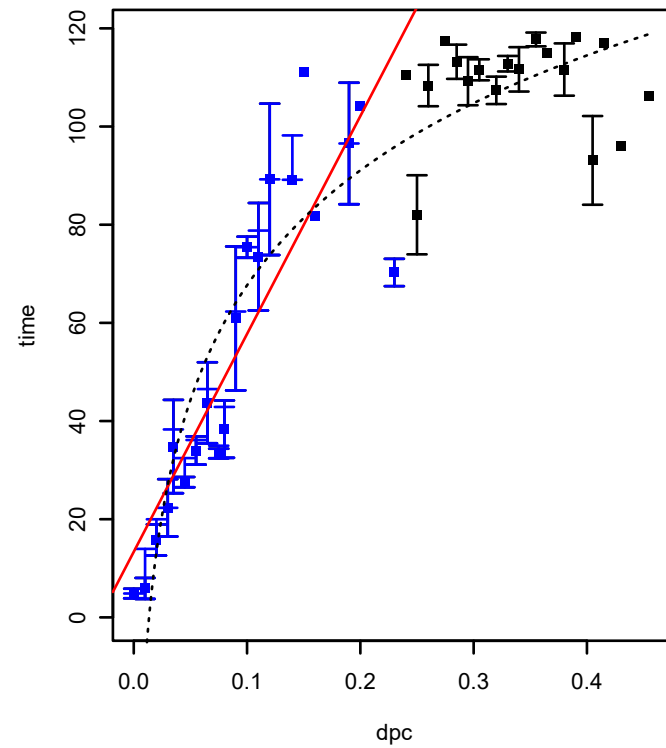**SPO3634 (COG1977)**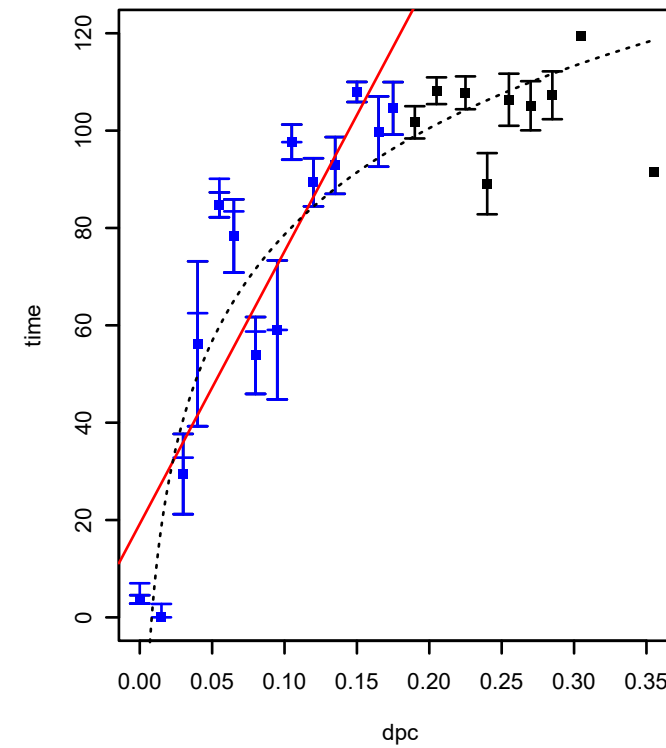**SPO3873 (COG1074)**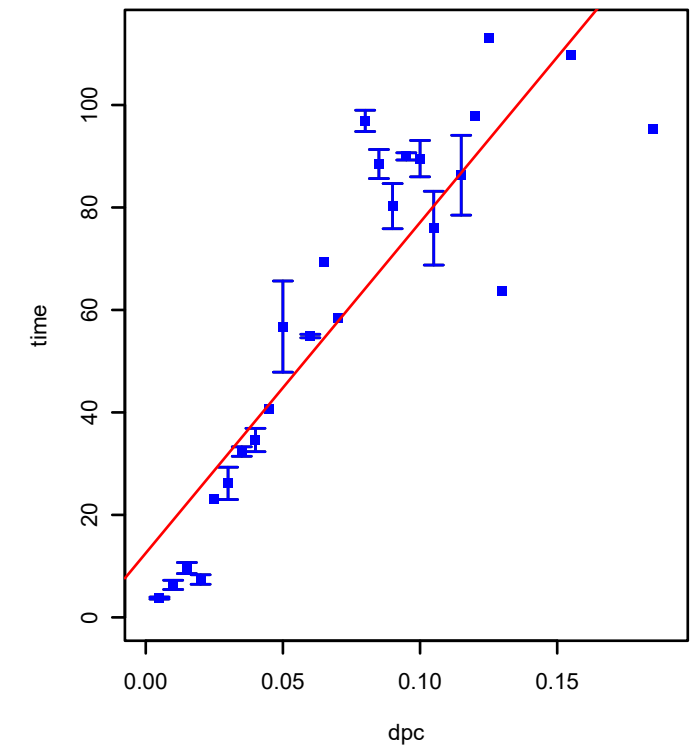

**SPO0060 (COG1051) (\*HTCC2255-Basal)**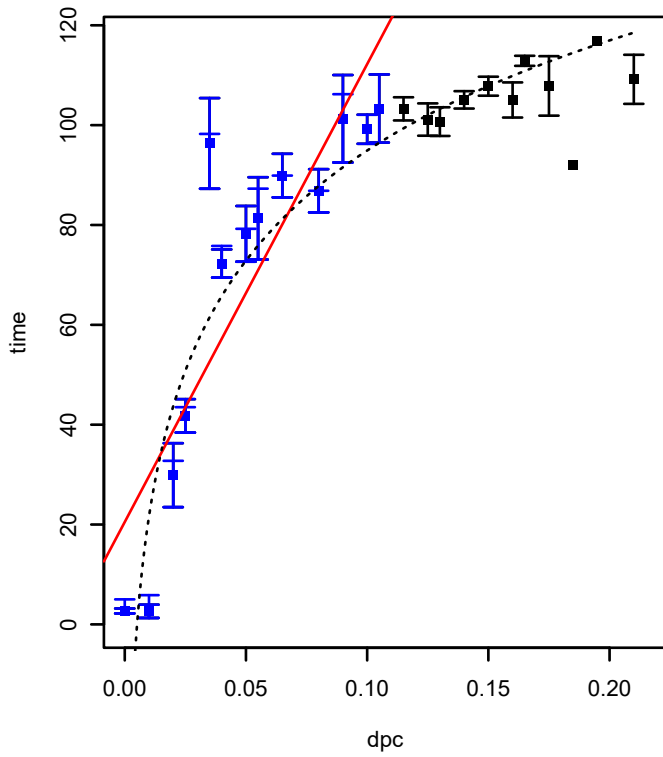**SPO3016 (COG0685) (\*HTCC2255-Basal)**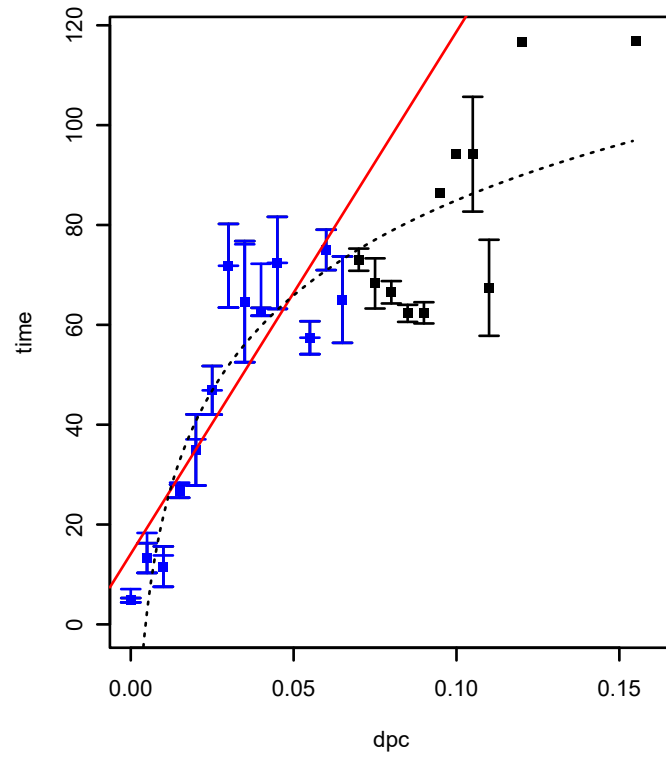**SPO2167 (COG0349) (\*HTCC2255-Basal)**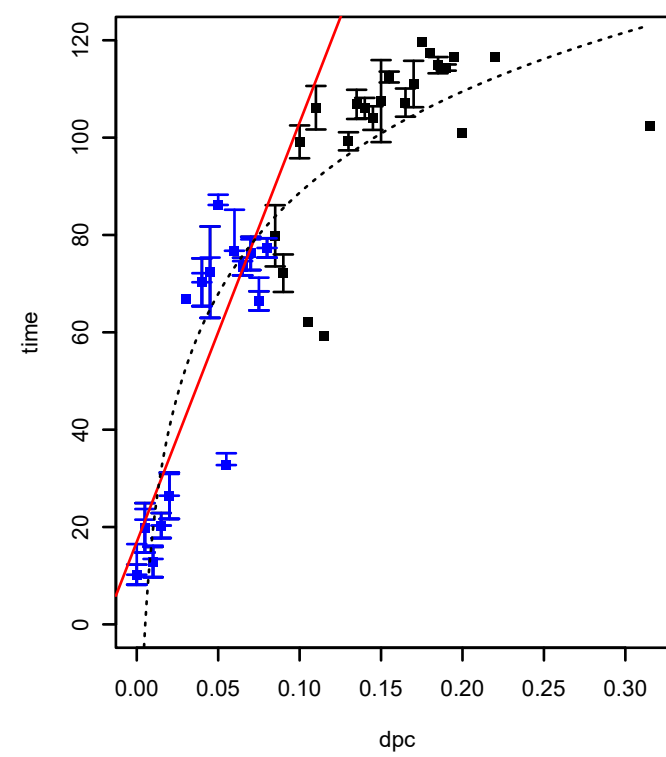**SPO2511 (COG1734) (\*HTCC2255-Basal)**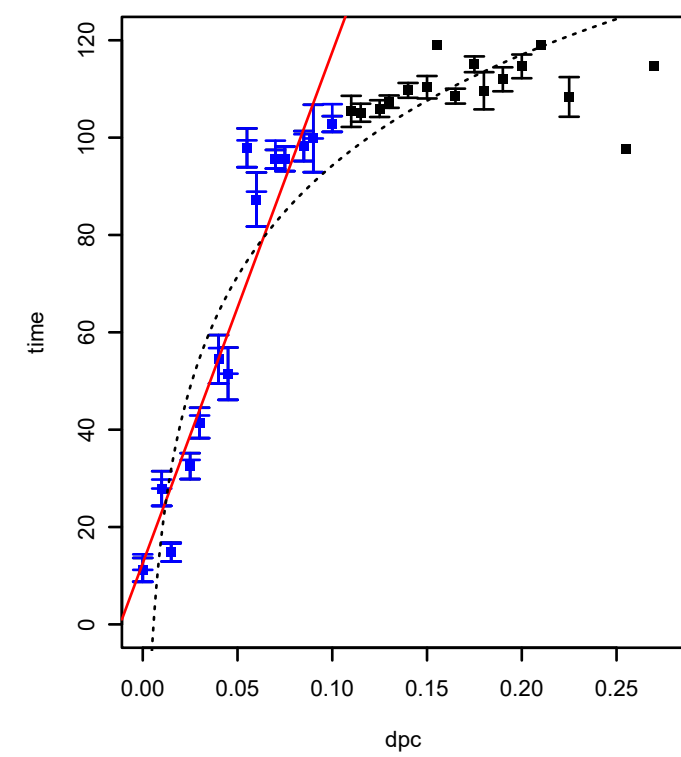**SPO2505 (COG0232) (\*HTCC2255-Basal)**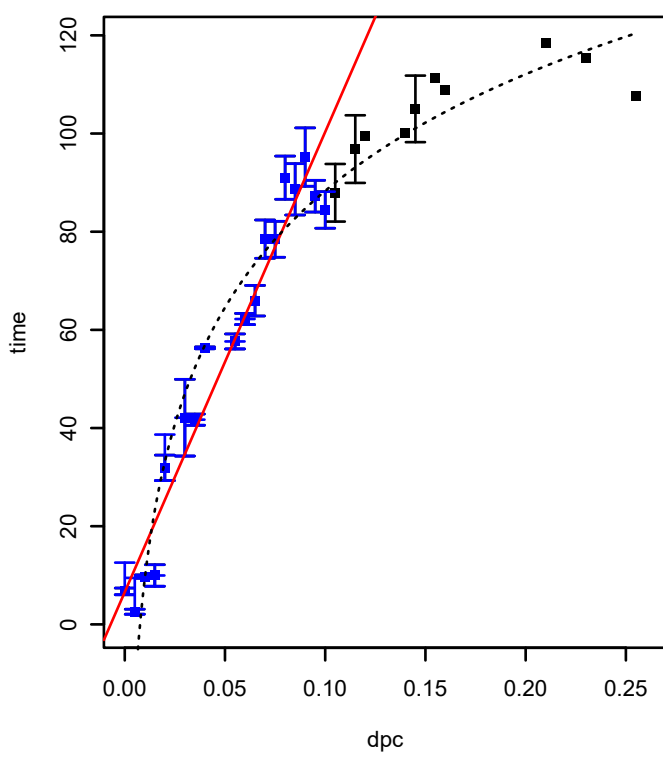**SPO3353 (COG0560) (\*HTCC2255-Basal)**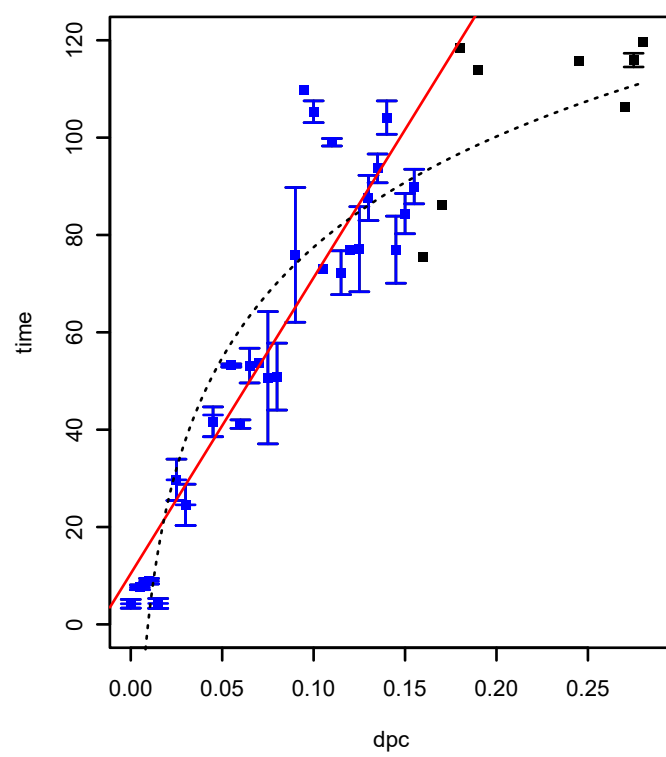**SPO2924 (NA) (\*HTCC2255-Basal)**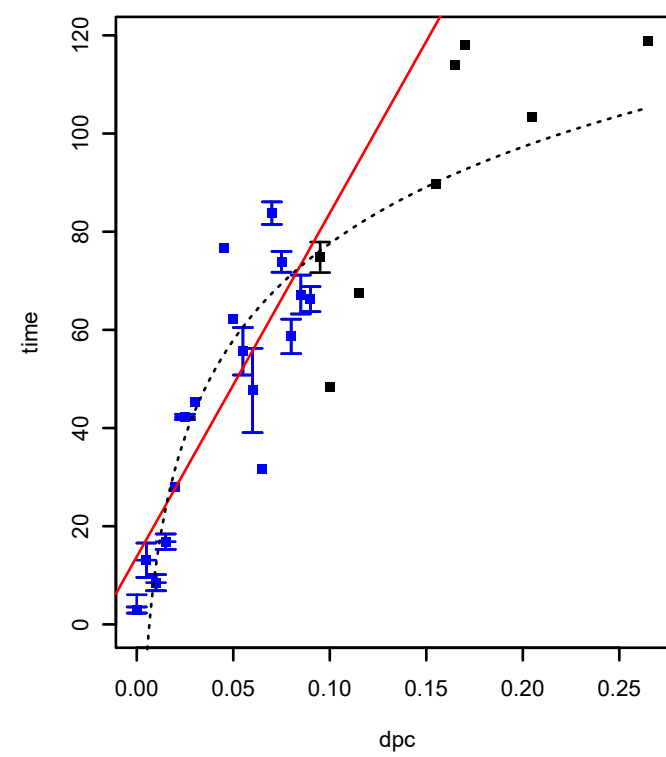**SPO2569 (COG2935)**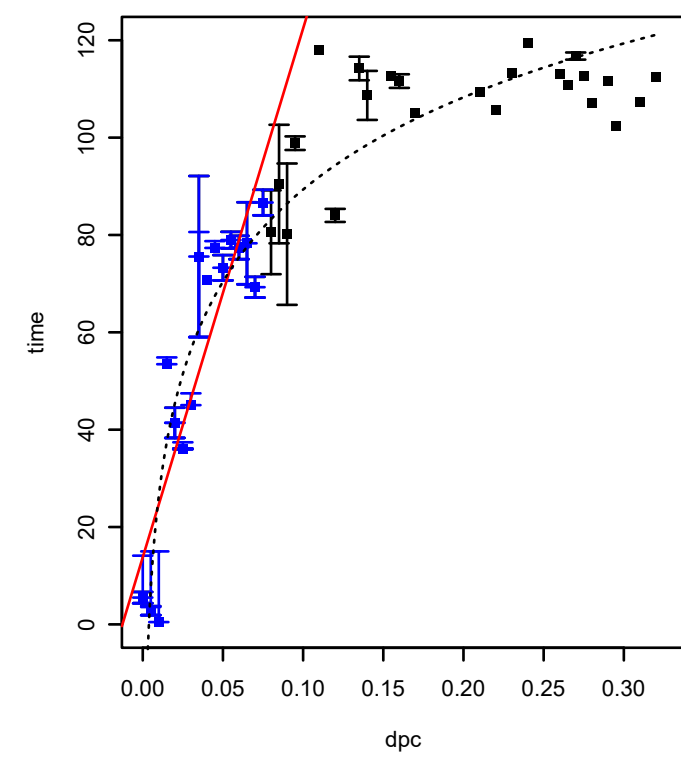

**SPO0502 (COG0098)**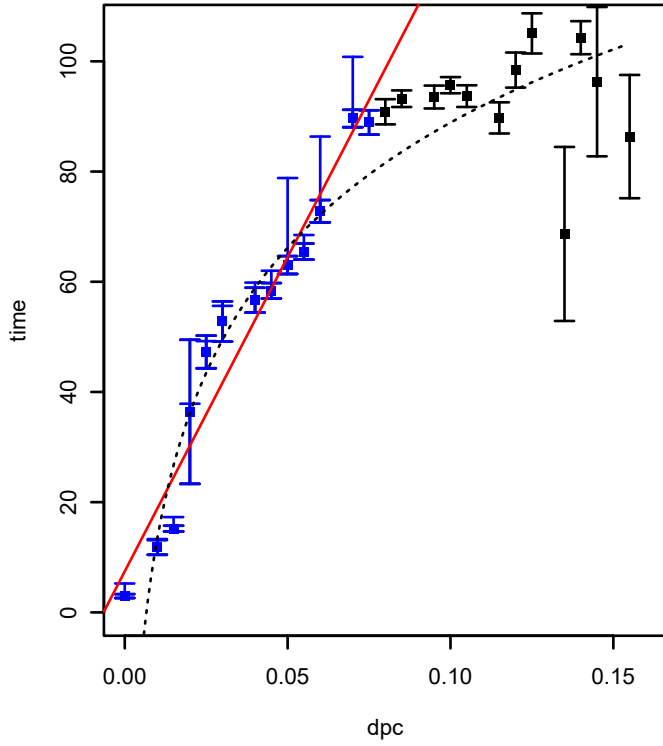**SPO0907 (COG1565) (\*HTCC2255-Basal)**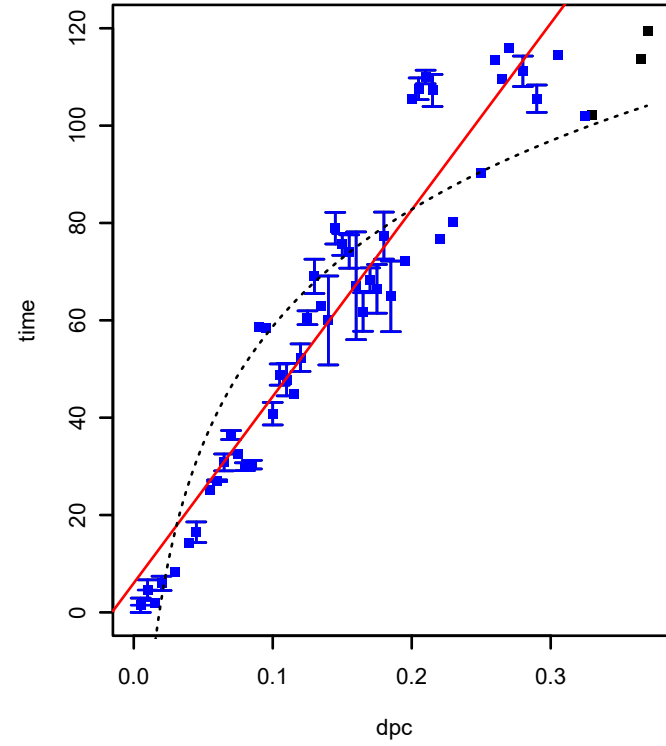**SPO1239 (COG2518) (\*HTCC2255-Basal)**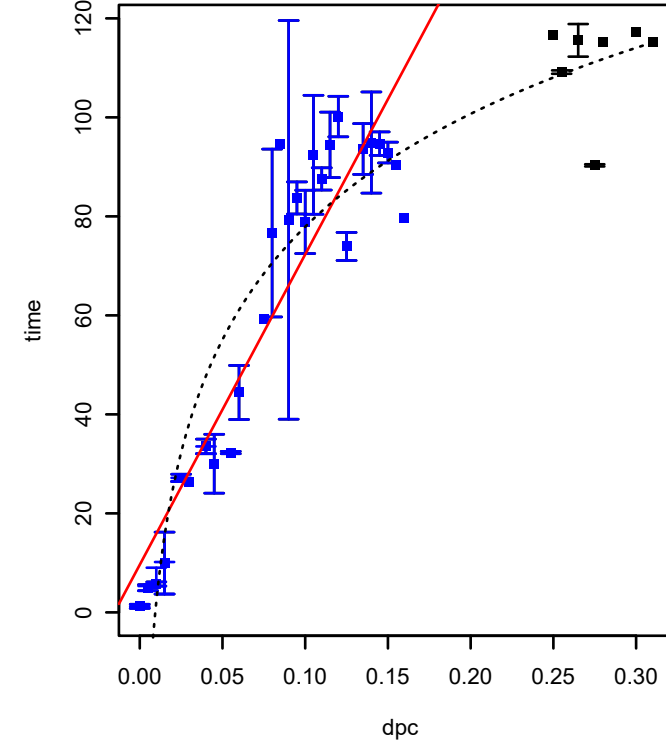**SPO2047 (COG0363)**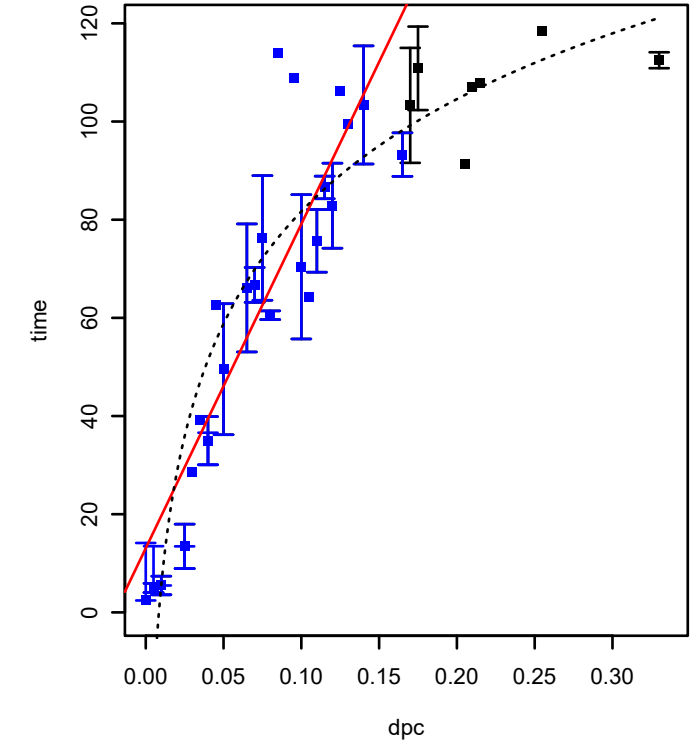**SPO2230 (COG0739) (\*HTCC2255-Basal)**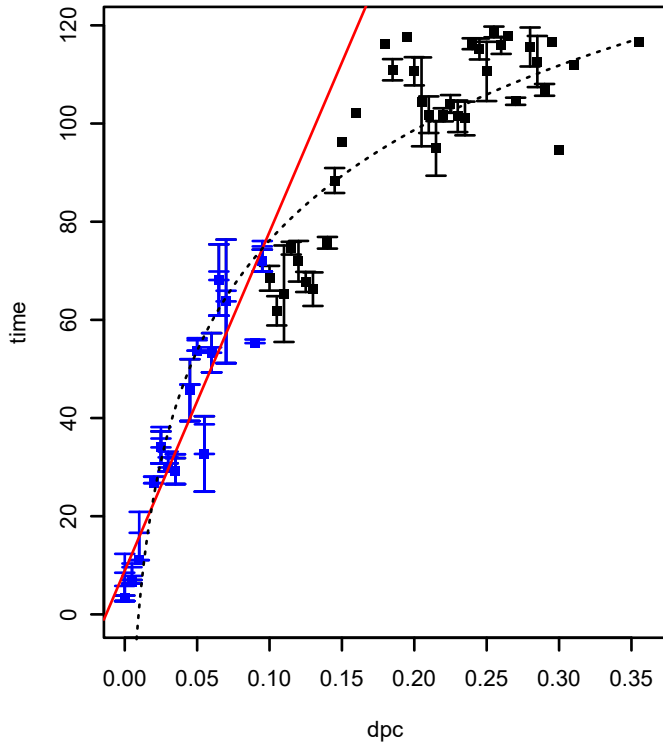**SPO3718 (COG0791) (\*HTCC2255-Basal)**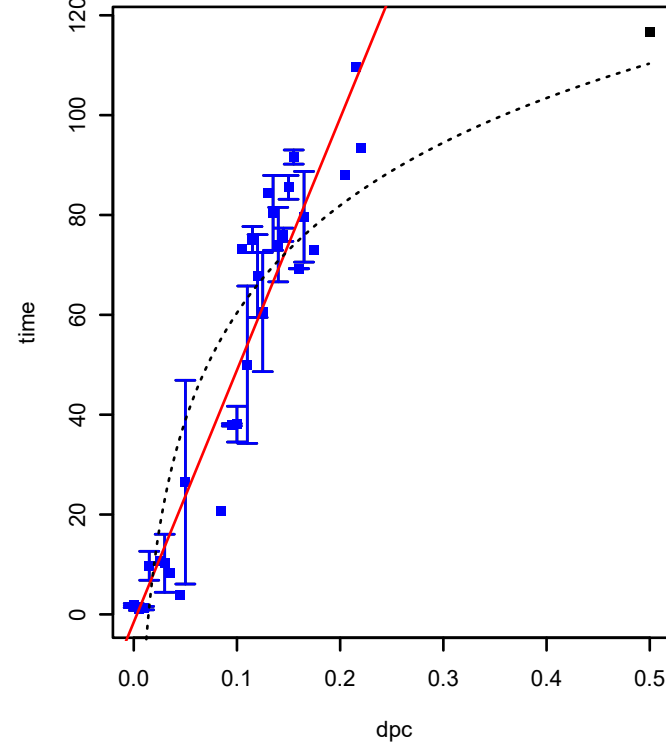**SPO3425 (COG0708) (\*HTCC2255-Basal)**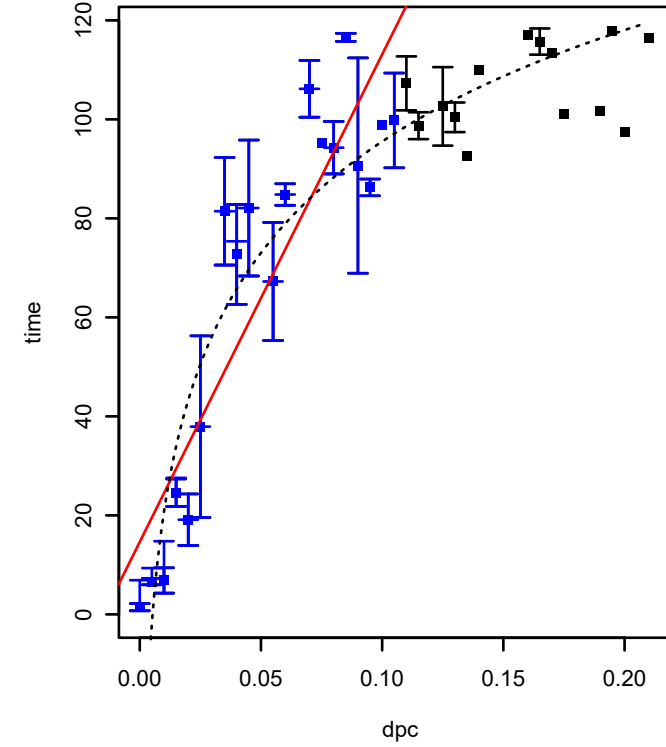**SPOA0040 (COG0239)**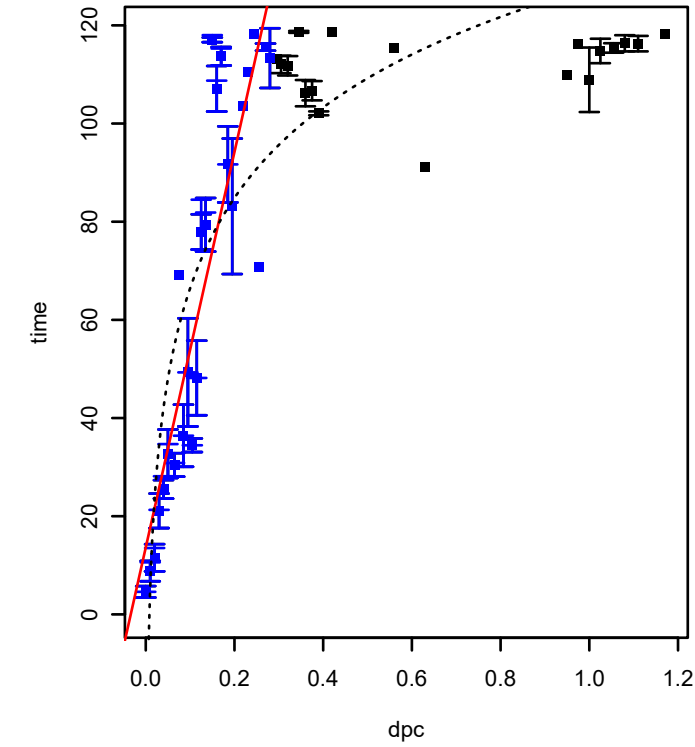

**SPO2130 (COG0119)**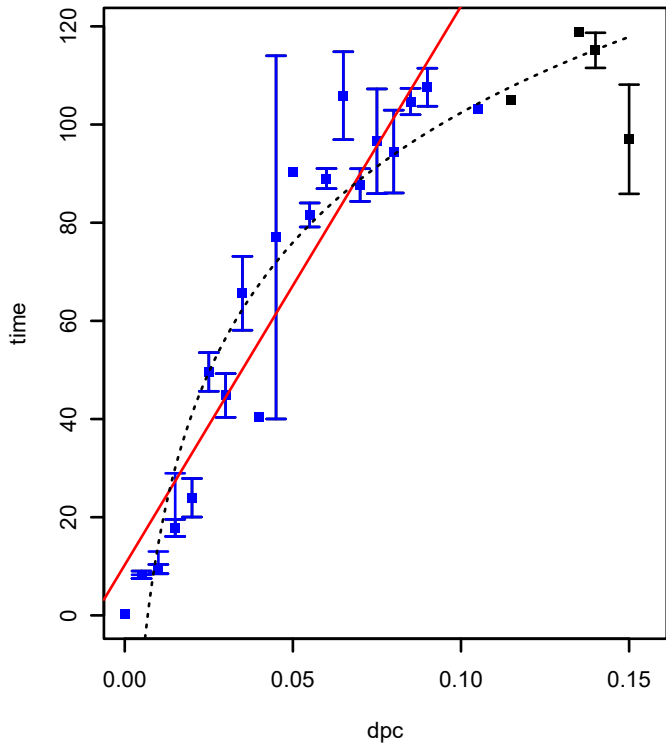**SPO3280 (COG0389) (\*HTCC2255-Basal)**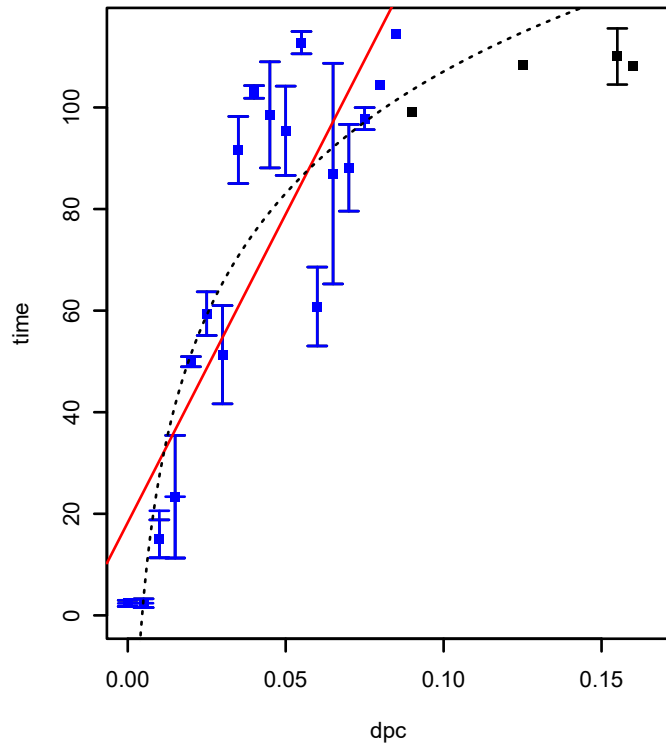**SPO3819 (COG1485) (\*HTCC2255-Basal)**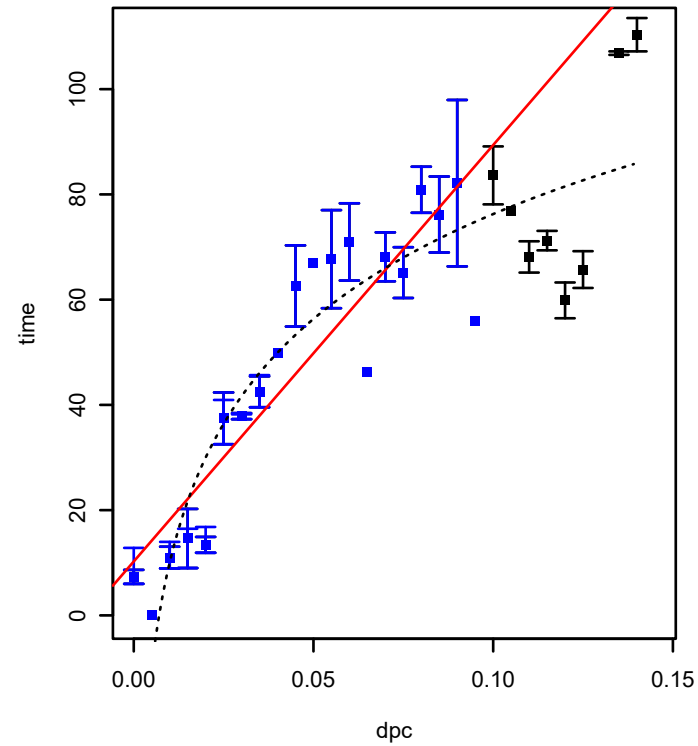**SPO2091 (COG1267) (\*HTCC2255-Basal)**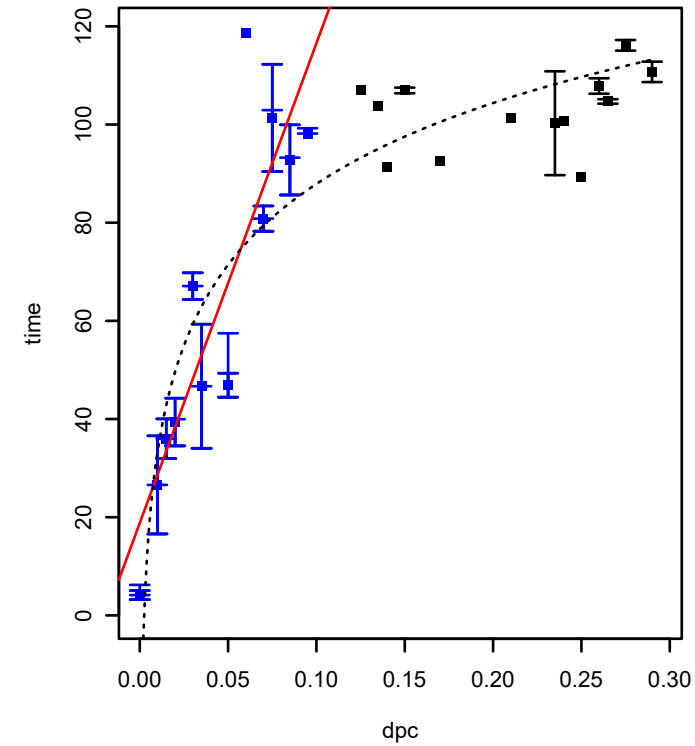**SPO0295 (COG4233) (\*HTCC2255-Basal)**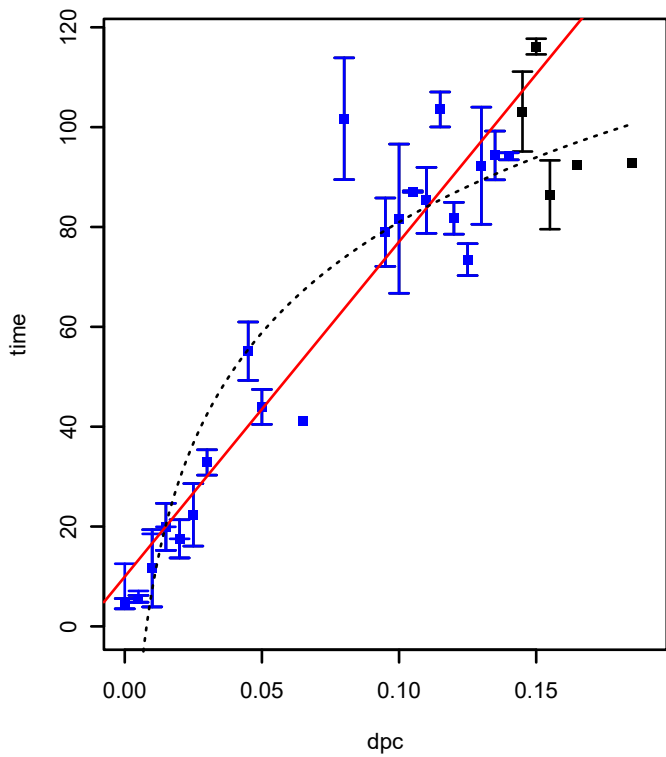**SPO0409 (COG0756)**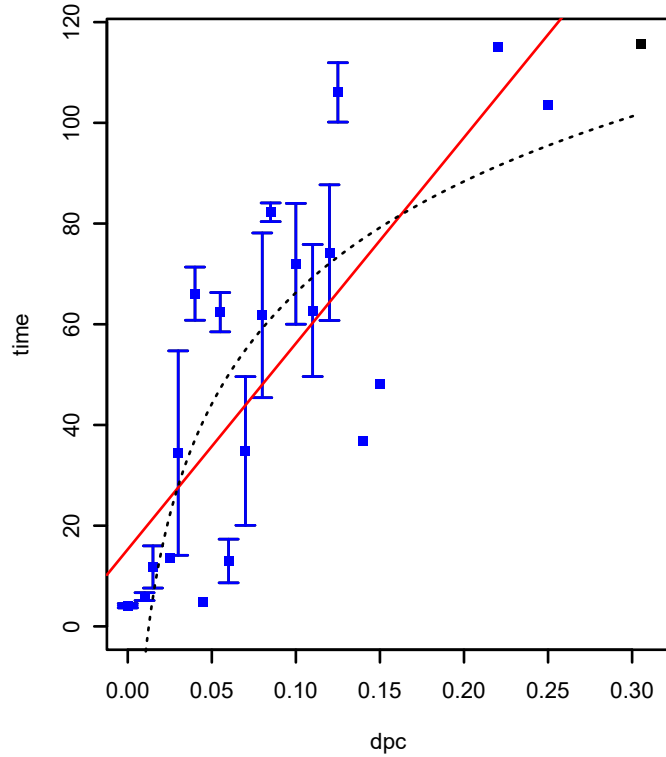**SPO1870 (COG0046)**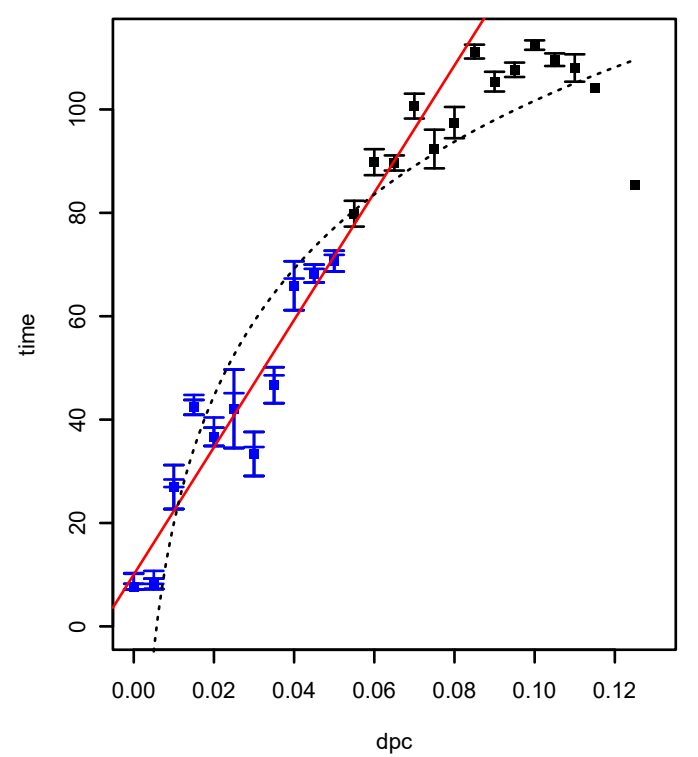**SPO3514 (COG0080)**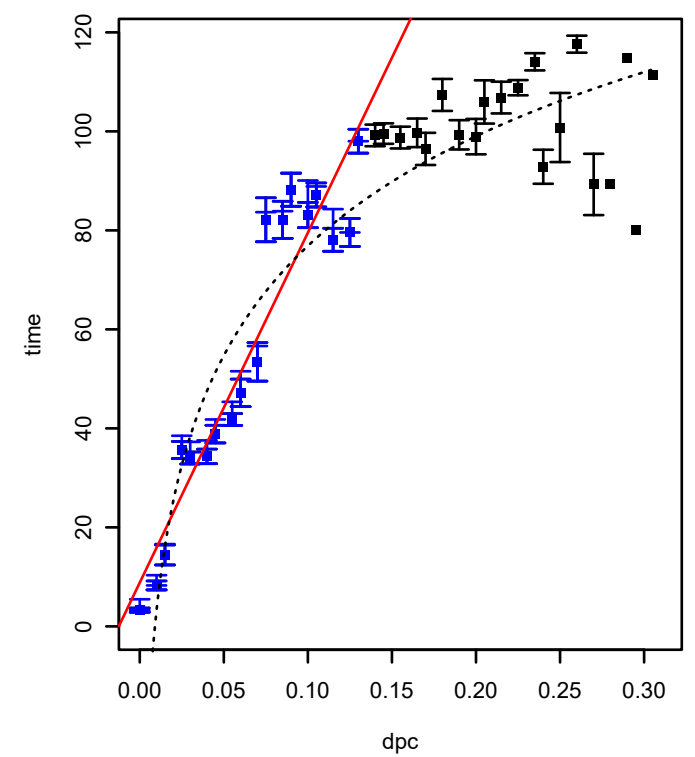

**SPO3513 (COG0081)**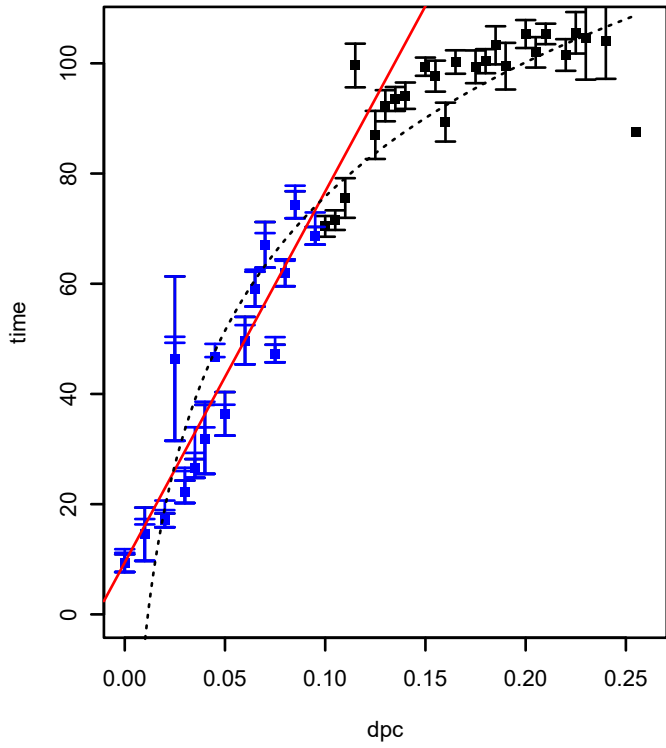**SPO1666 (COG0575)**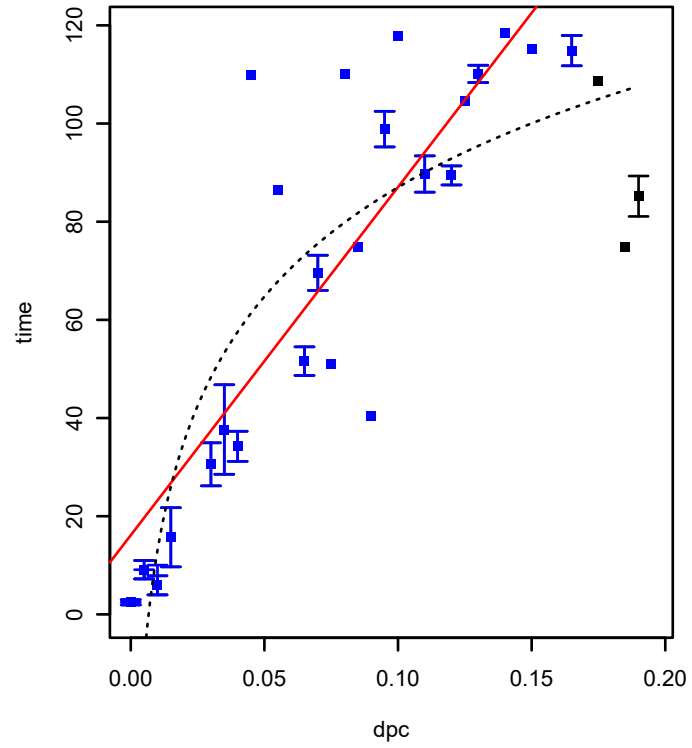**SPO2270 (COG1559) (\*HTCC2255-Basal)**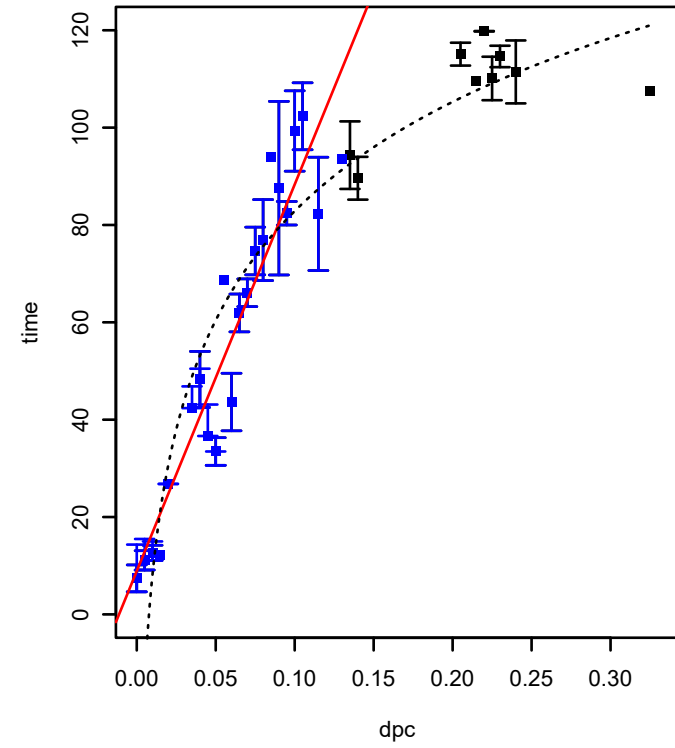**SPO0430 (COG0008) (\*HTCC2255-Basal)**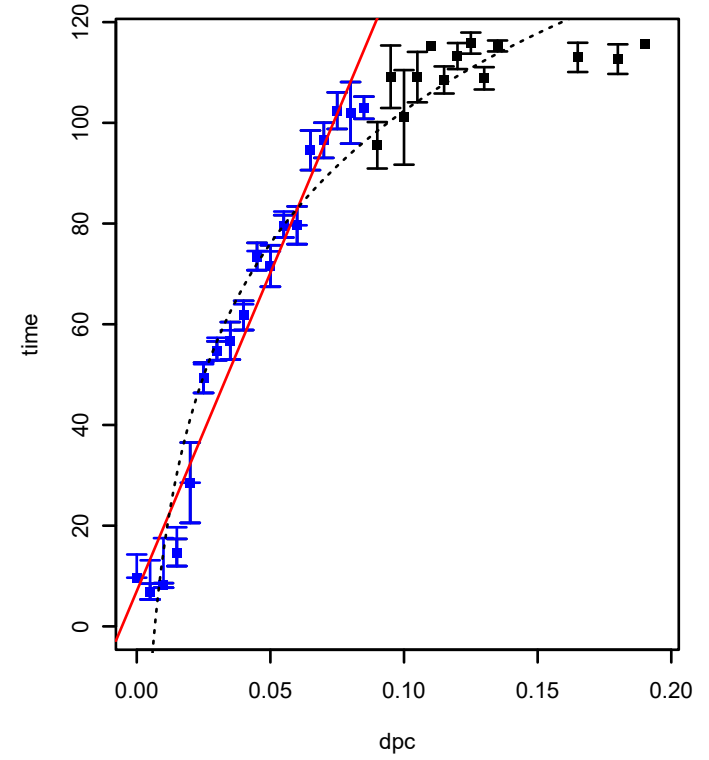**SPO1691 (COG0102)**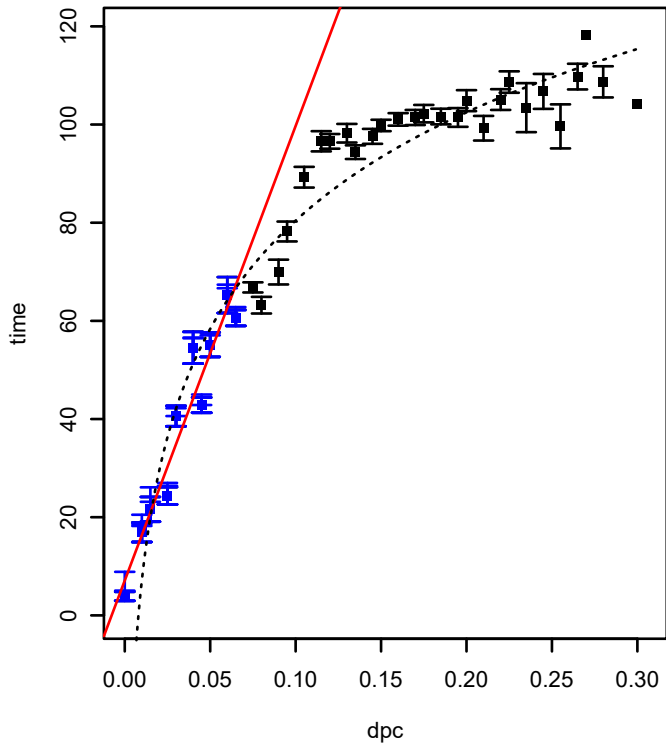**SPO0906 (COG1496) (\*HTCC2255-Basal)**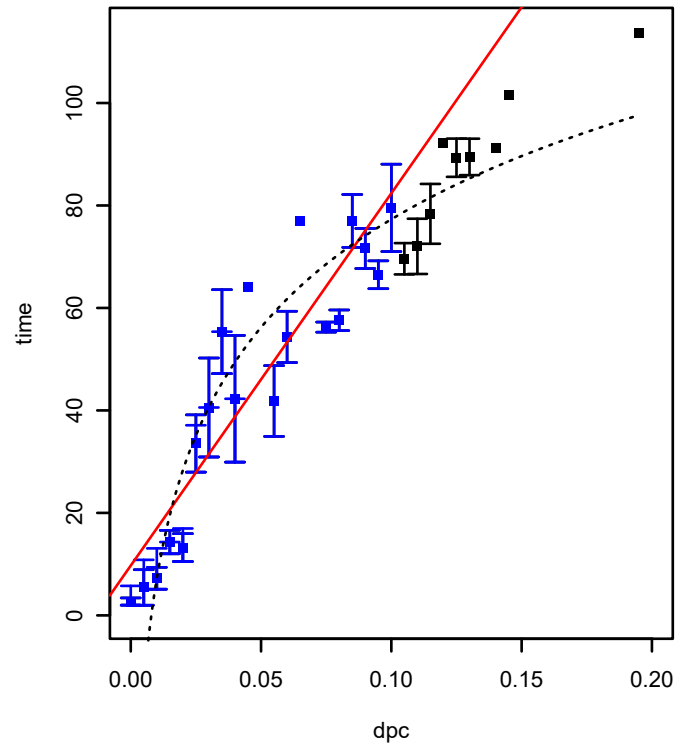**SPO0665 (COG2900) (\*HTCC2255-Basal)**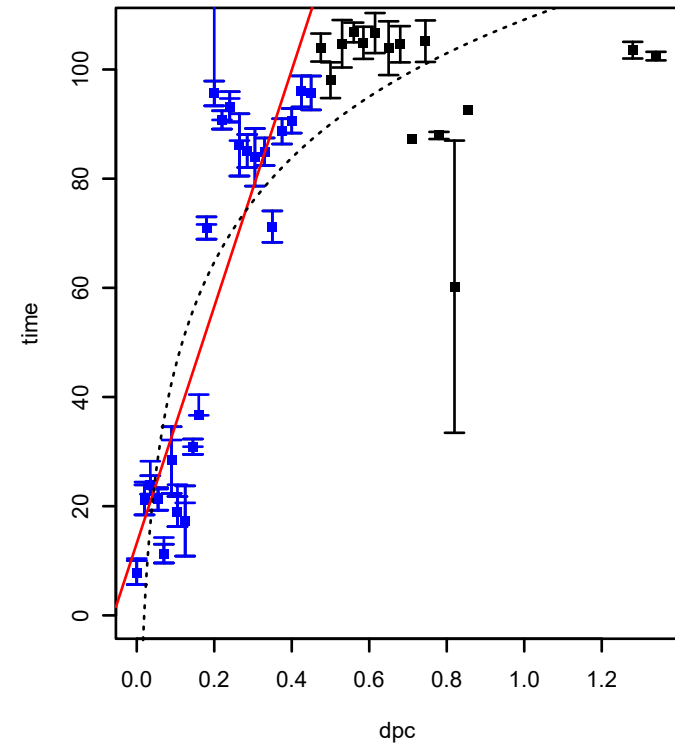**SPO0006 (COG0635) (\*HTCC2255-Basal)**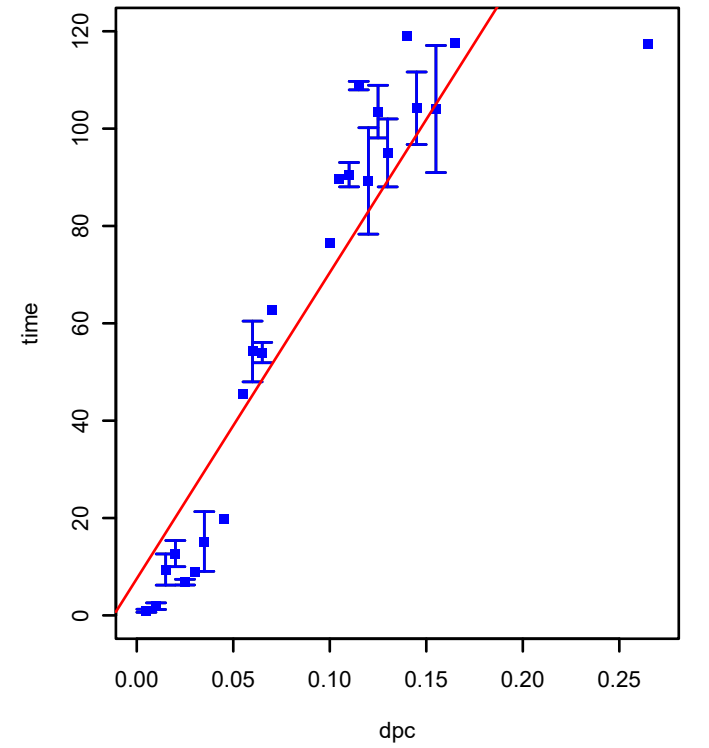

**SPO0398 (COG0683)**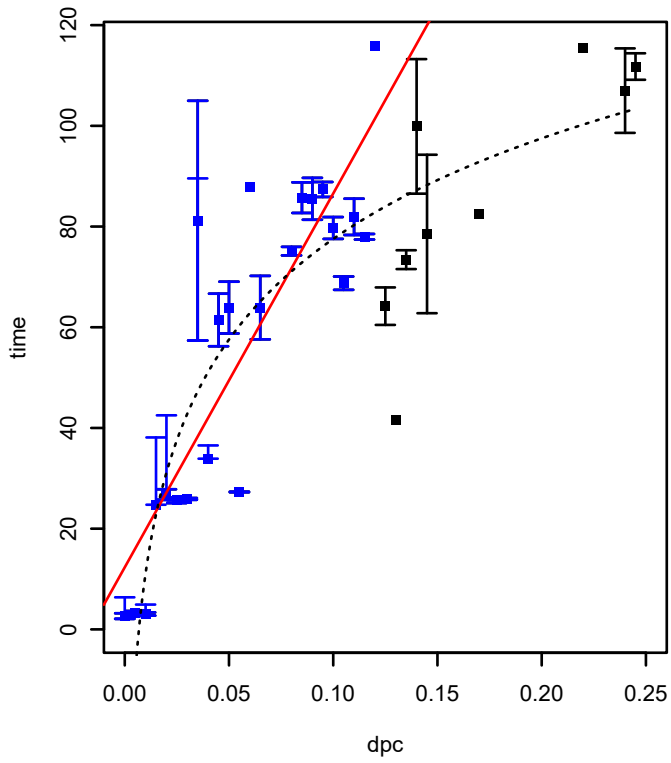**SPOA0209 (COG0665)**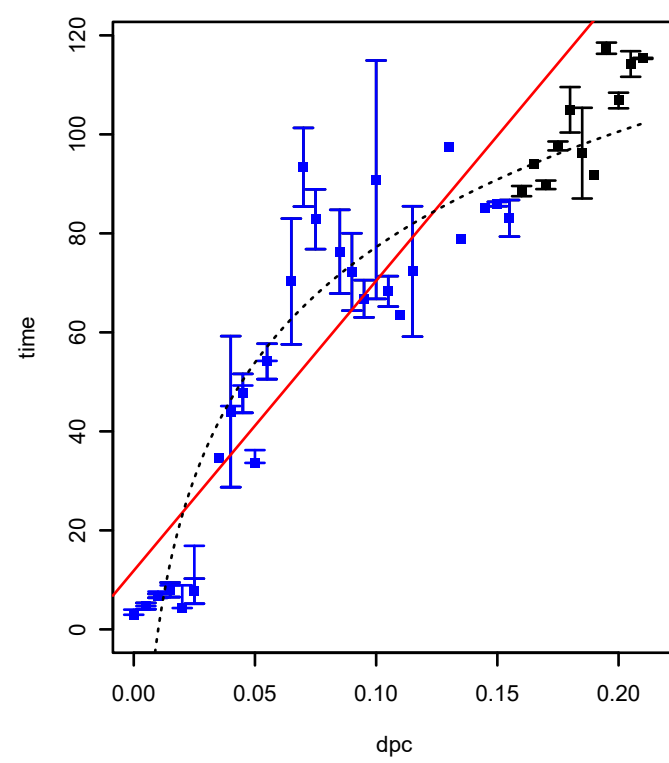**SPO0408 (COG0452) (\*HTCC2255-Basal)**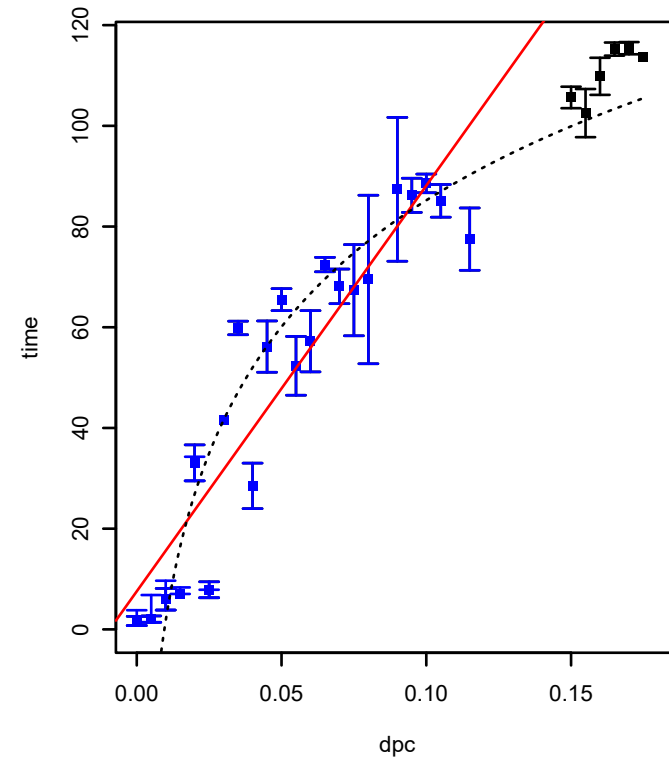**SPO2056 (COG0352) (\*HTCC2255-Basal)**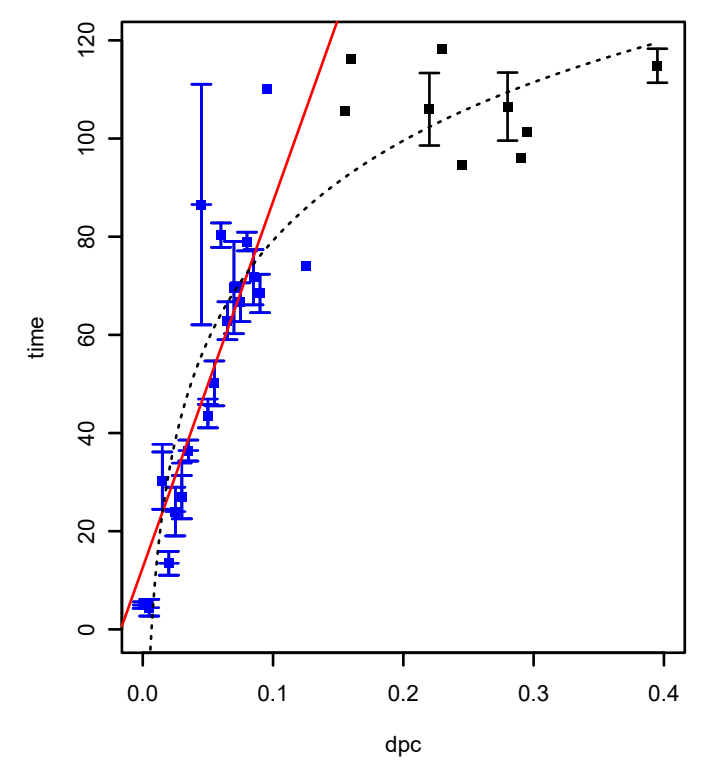**SPO2460 (COG2890) (\*HTCC2255-Basal)**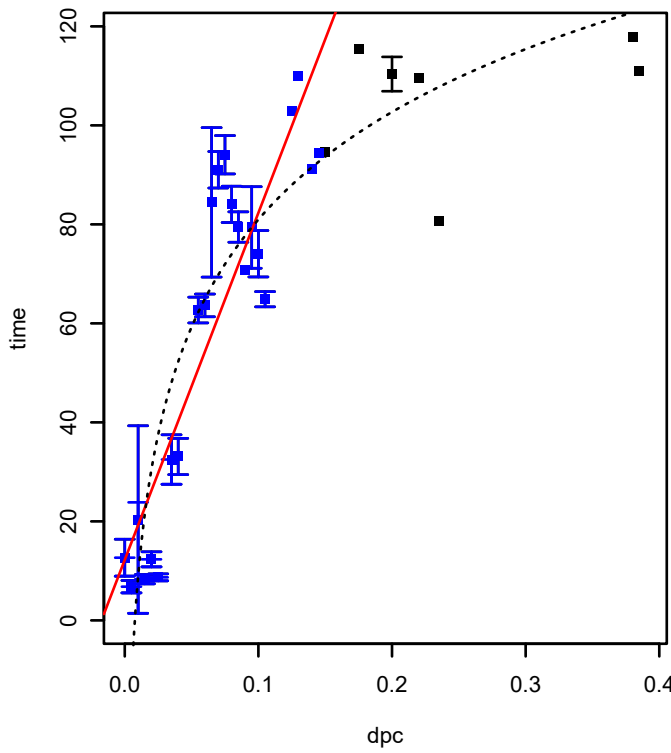**SPO1403 (COG0143) (\*HTCC2255-Basal)**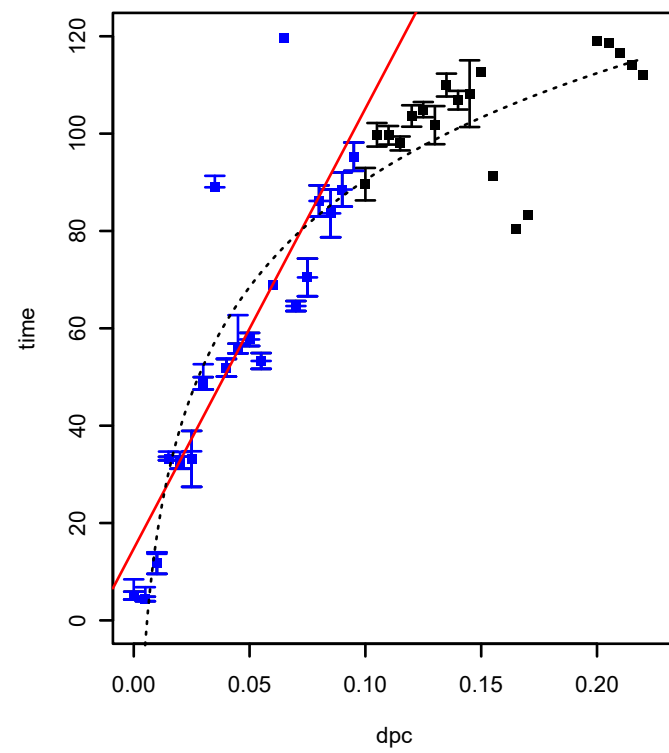**SPO2634 (COG0155)**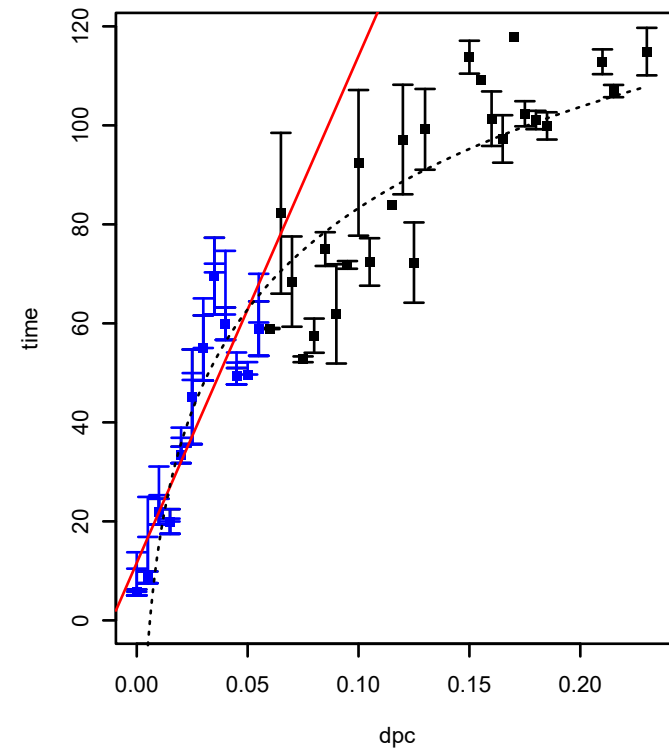**SPO0073 (COG0276) (\*HTCC2255-Basal)**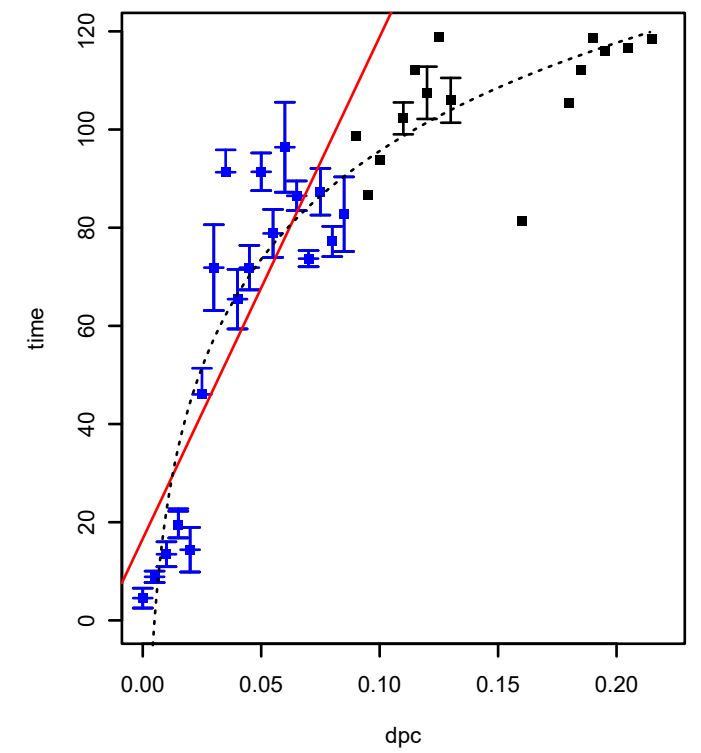



**SPO3887 (COG3030) (\*HTCC2255-Basal)**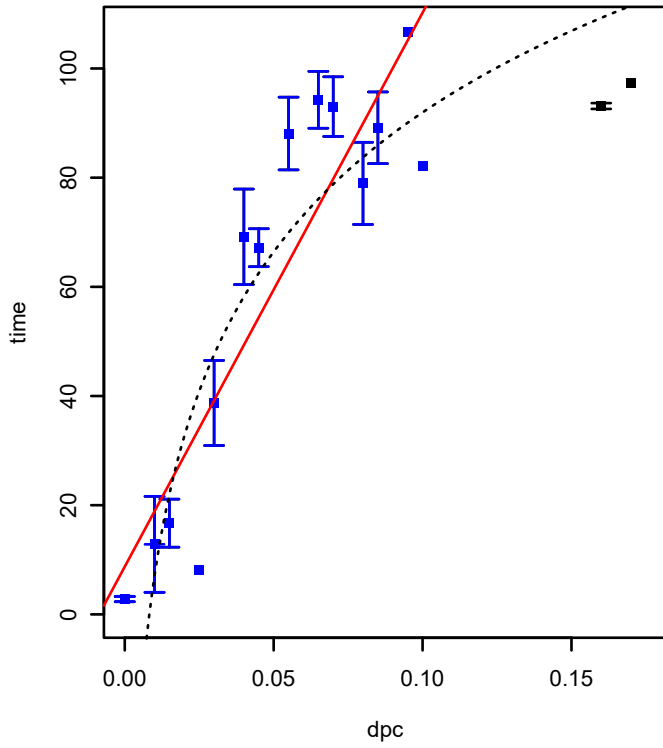**SPO3337 (COG2171)**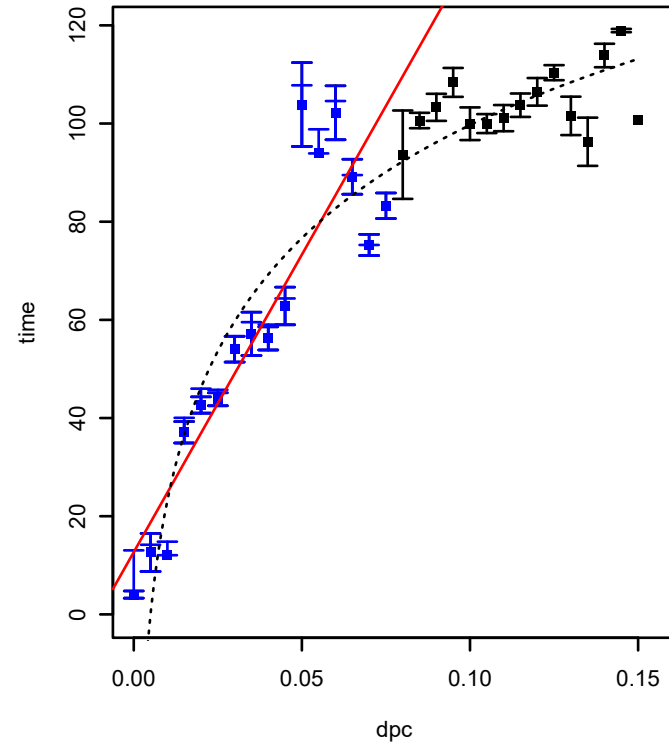**SPO2585 (COG1186)**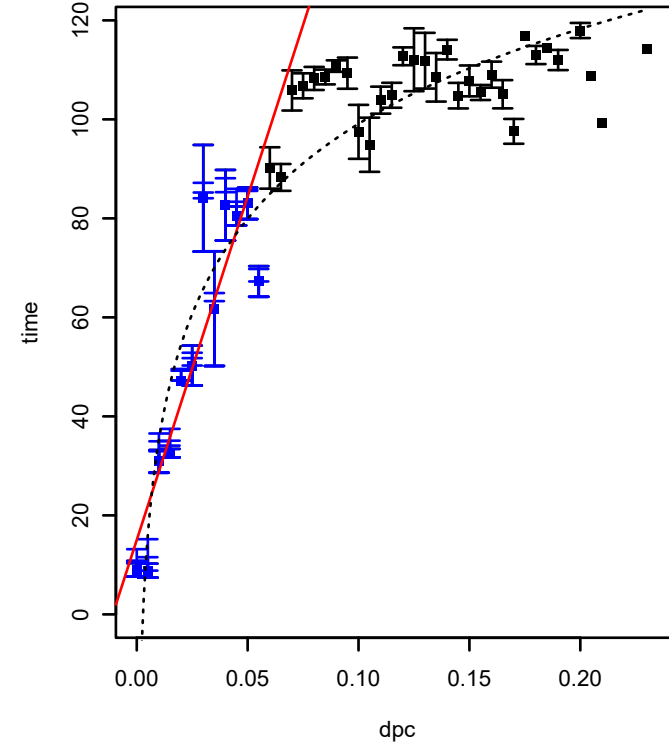**SPO0806 (COG0135) (\*HTCC2255-Basal)**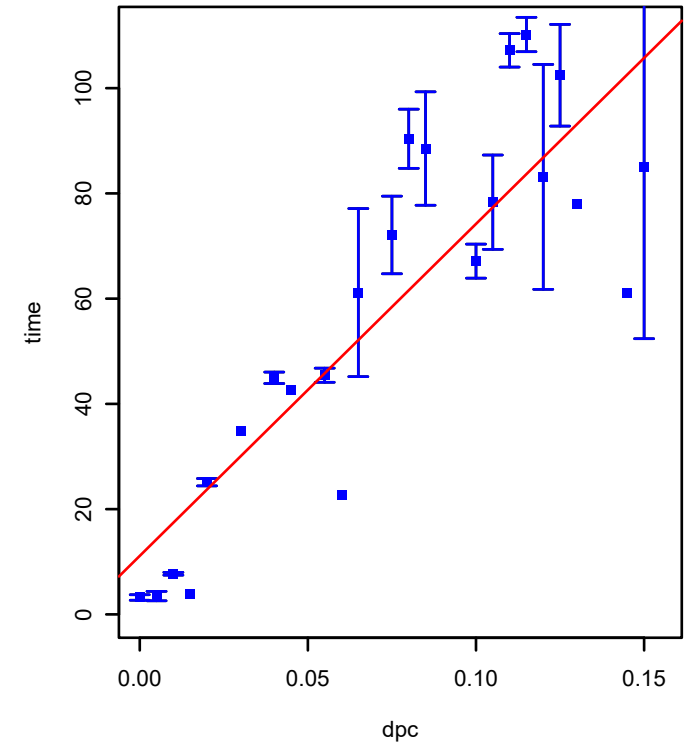**SPO0397 (COG2844) (\*HTCC2255-Basal)**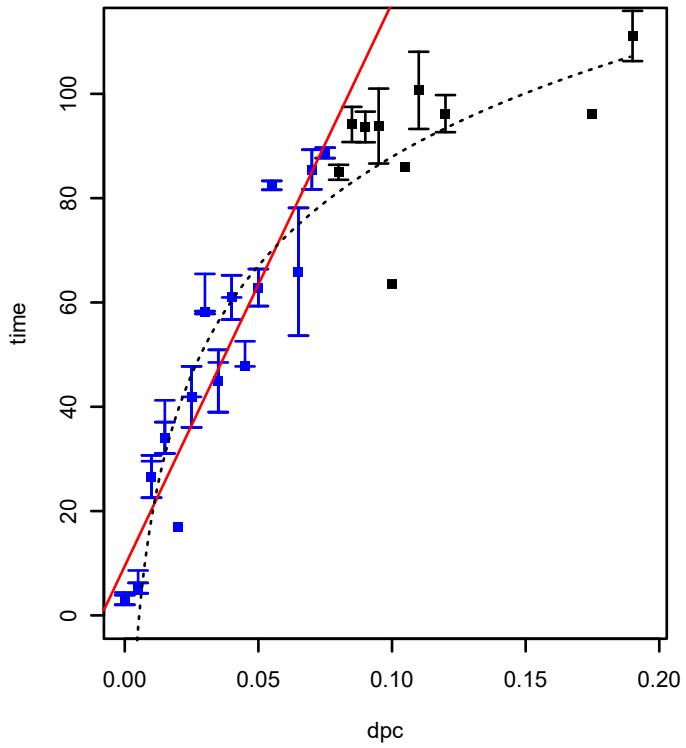**SPO2744 (COG0679) (\*HTCC2255-Basal)**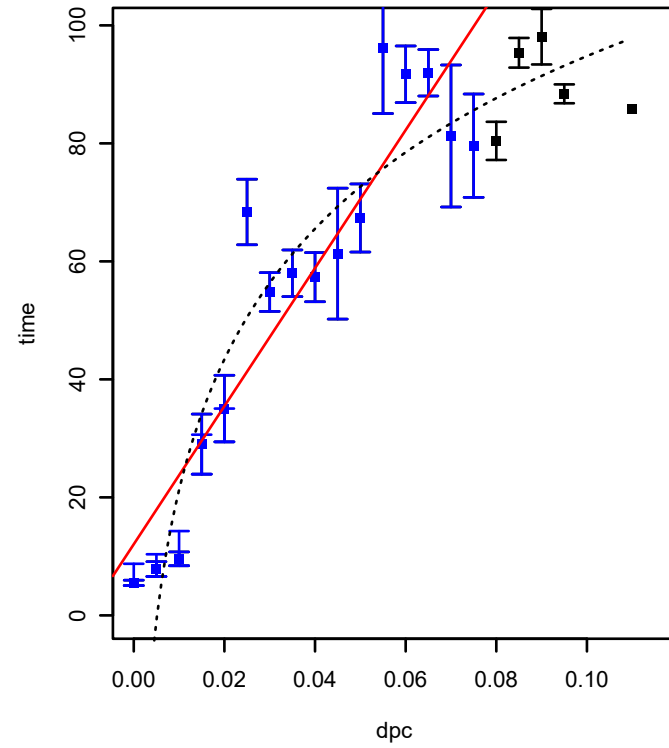**SPO2126 (COG0400) (\*HTCC2255-Basal)**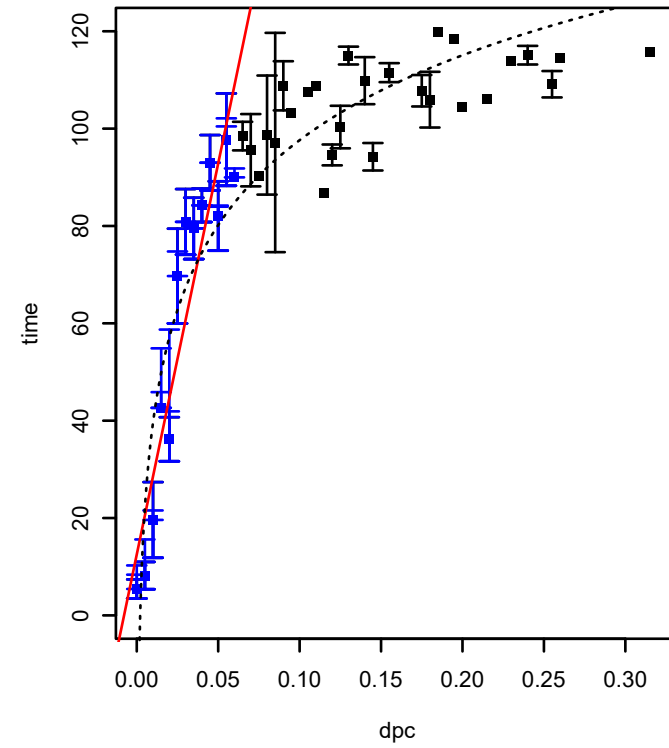**SPO3003 (COG0318) (\*HTCC2255-Basal)**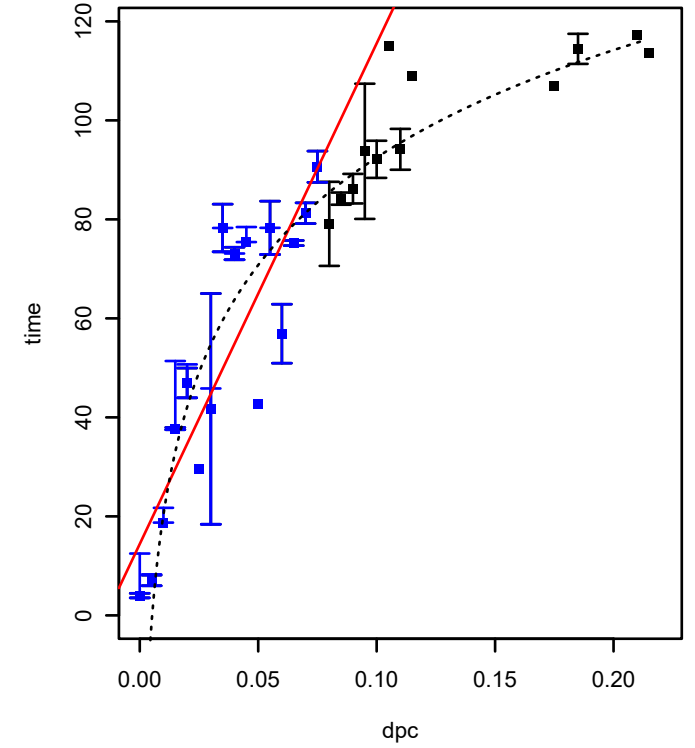

**SPO3654 (COG1028) (\*HTCC2255-Basal)**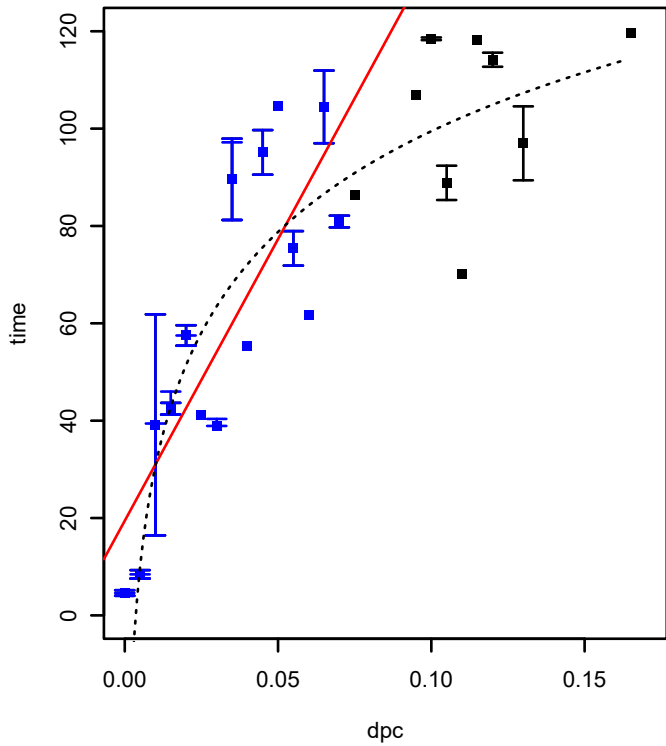**SPO2076 (COG0113) (\*HTCC2255-Basal)**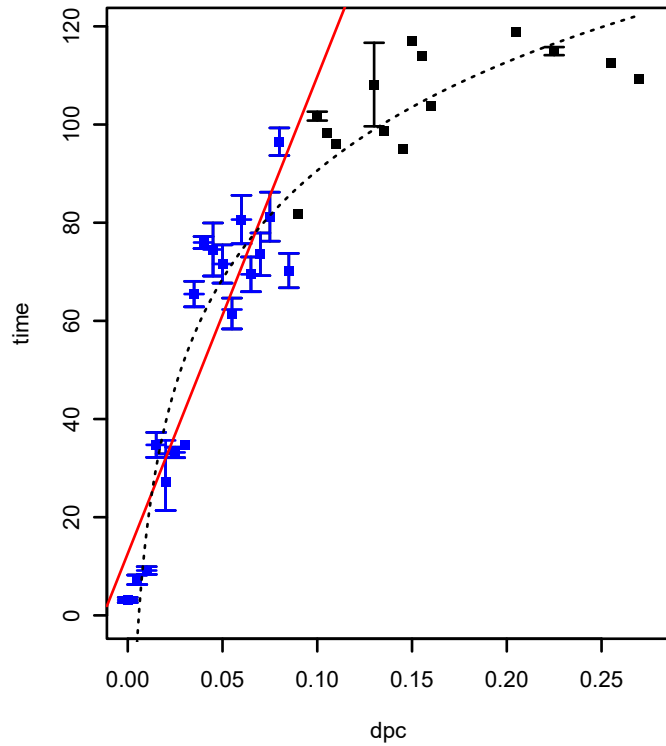**SPO3114 (NA)**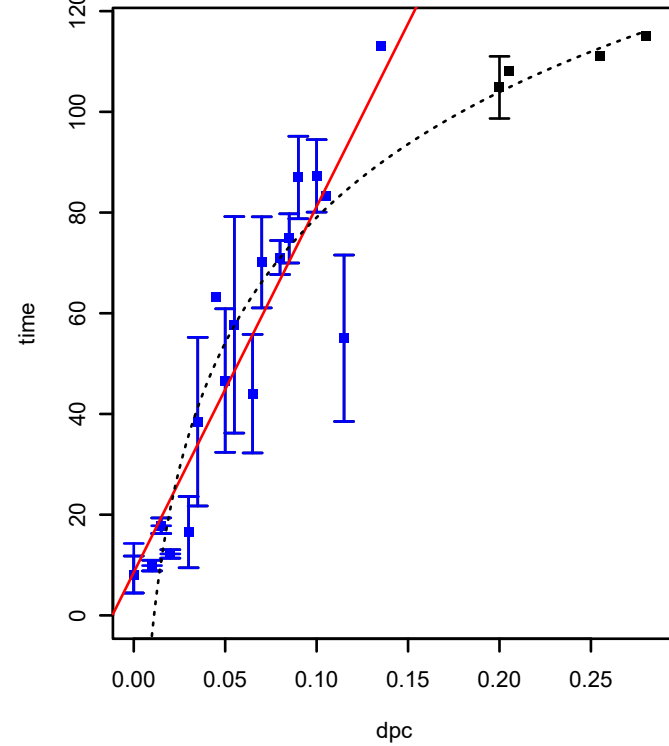**SPOA0010 (COG0815) (\*HTCC2255-Basal)**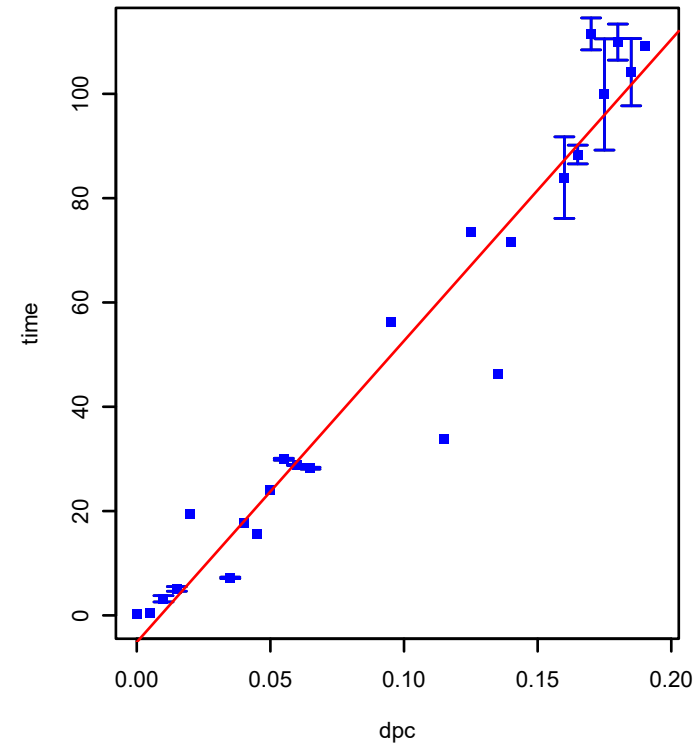**SPO0410 (COG0476) (\*HTCC2255-Basal)**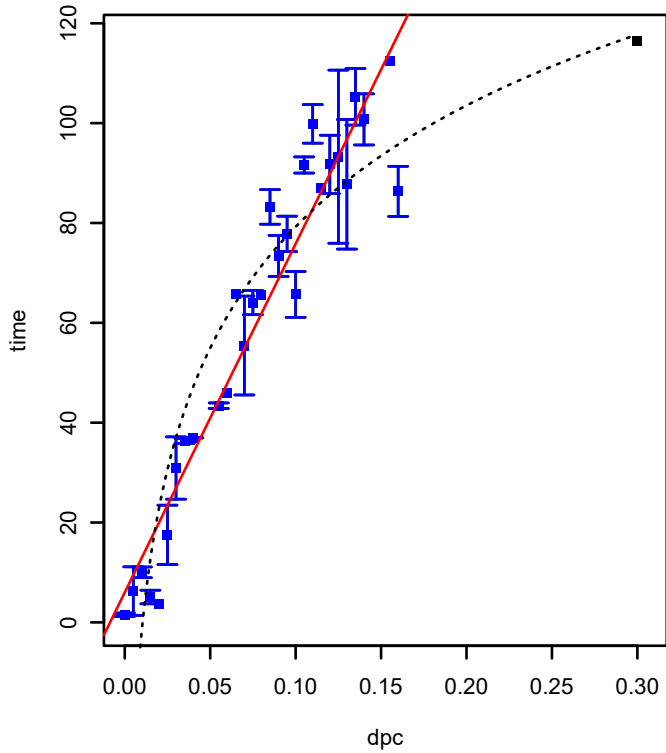**SPO3585 (COG0494)**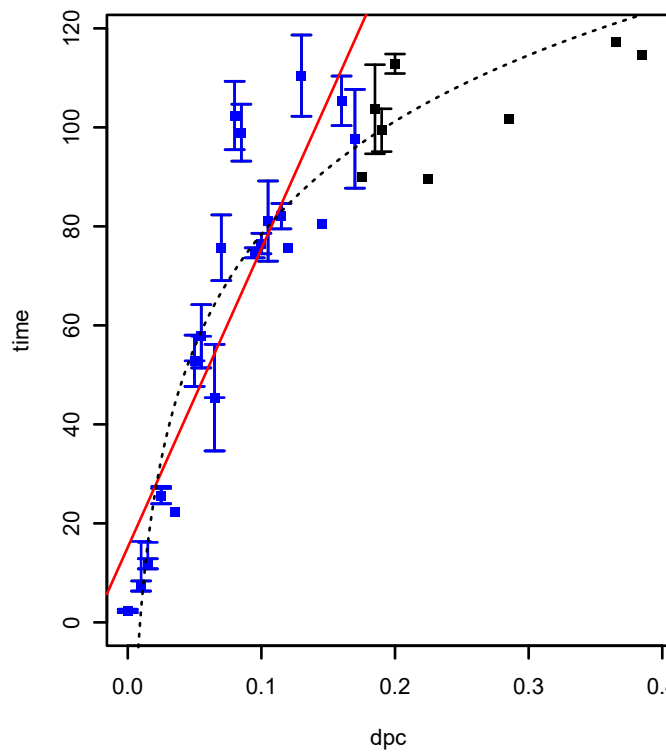**SPO0009 (COG1420) (\*HTCC2255-Basal)**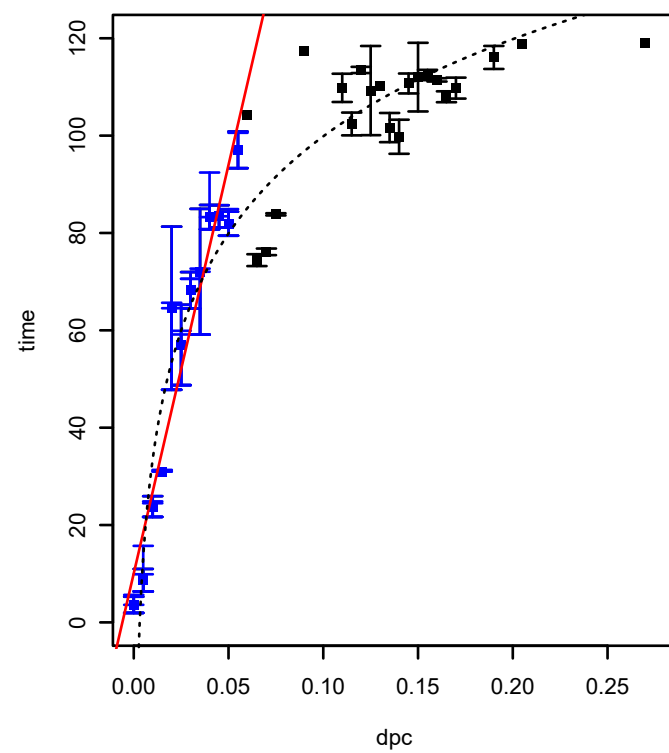**SPO1377 (COG0505) (\*HTCC2255-Basal)**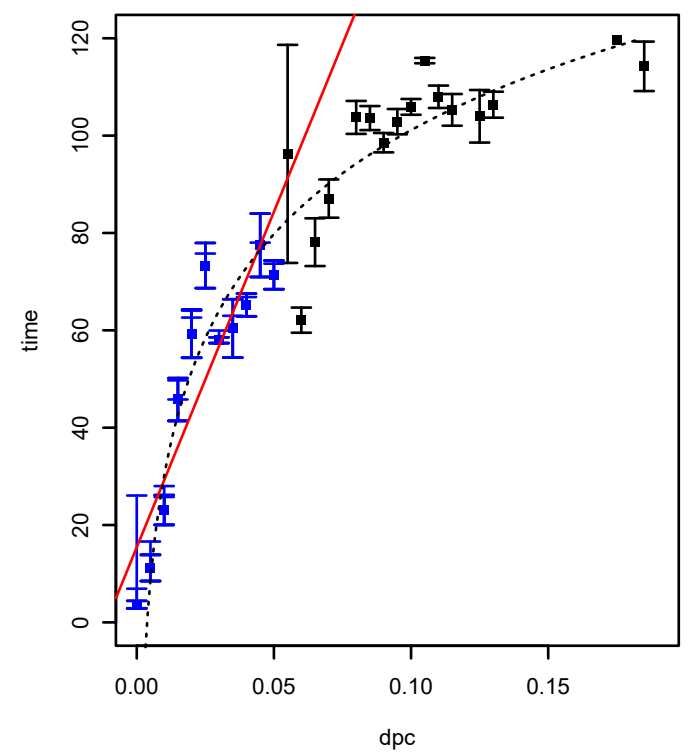

**SPO2153 (COG0303) (\*HTCC2255-Basal)**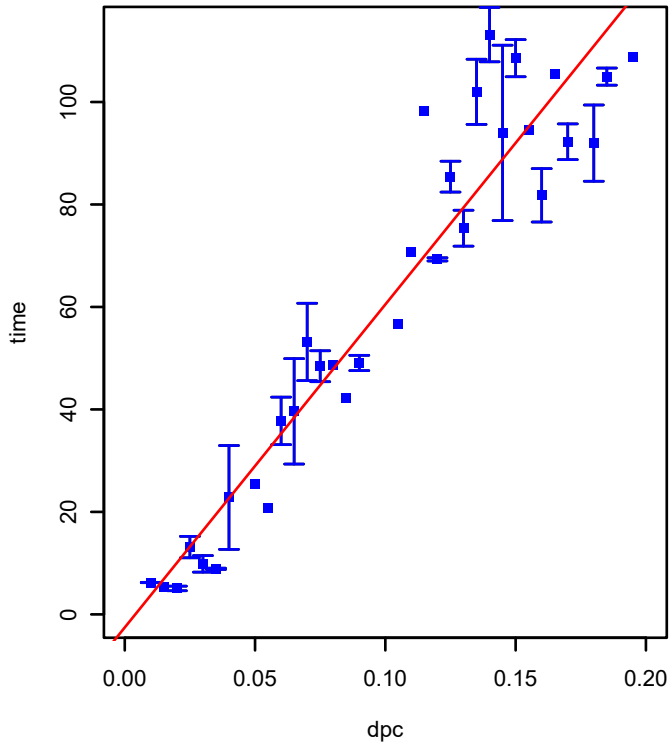**SPOA0017 (COG0283) (\*HTCC2255-Basal)**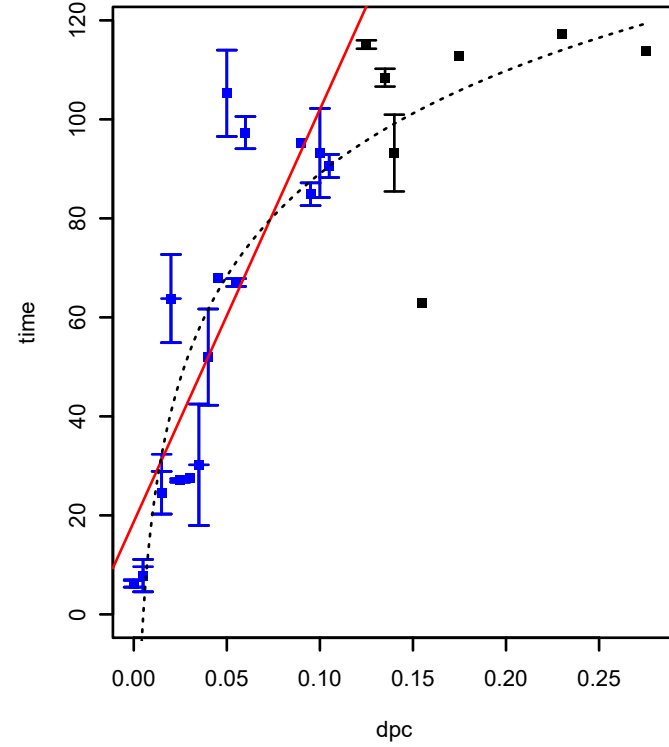**SPO3332 (COG0624) (\*HTCC2255-Basal)**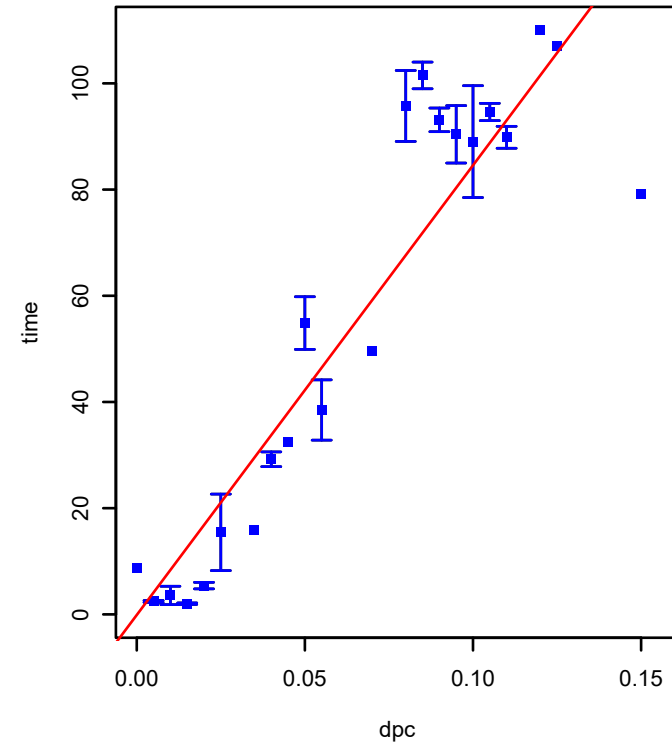**SPO3168 (COG0491) (\*HTCC2255-Basal)**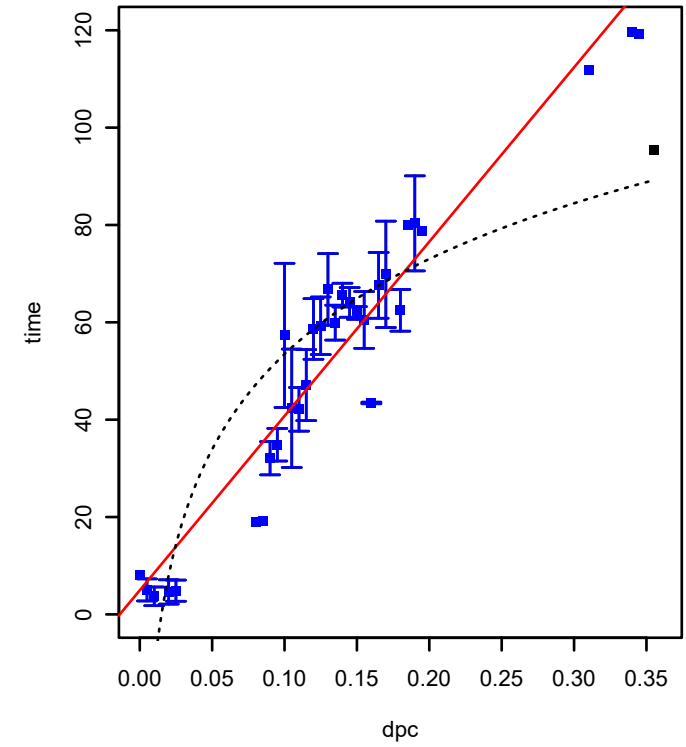**SPO3602 (COG3492)**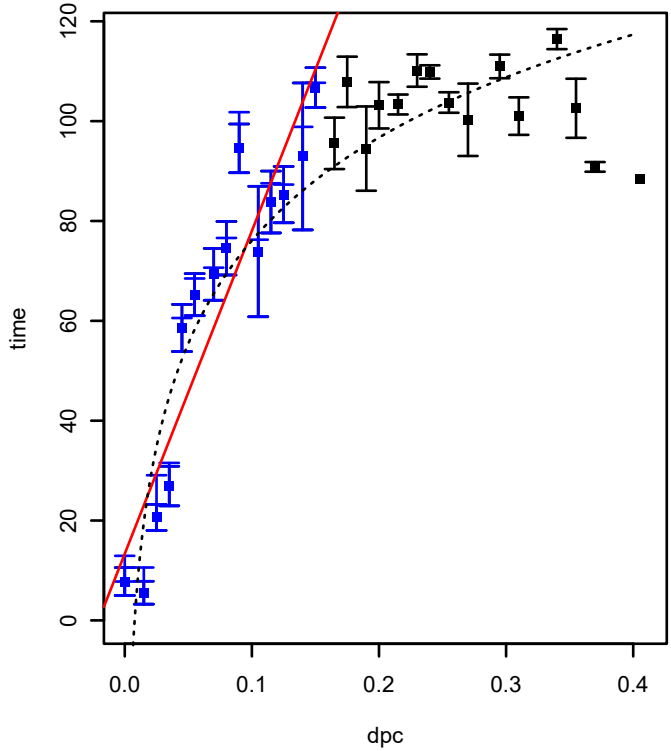**SPO0358 (COG2009)**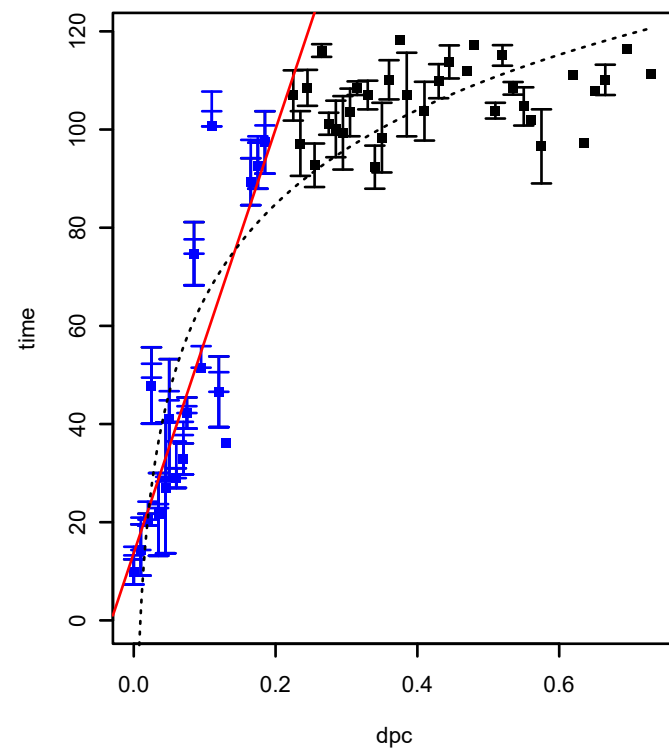**SPO0373 (COG0507) (\*HTCC2255-Basal)**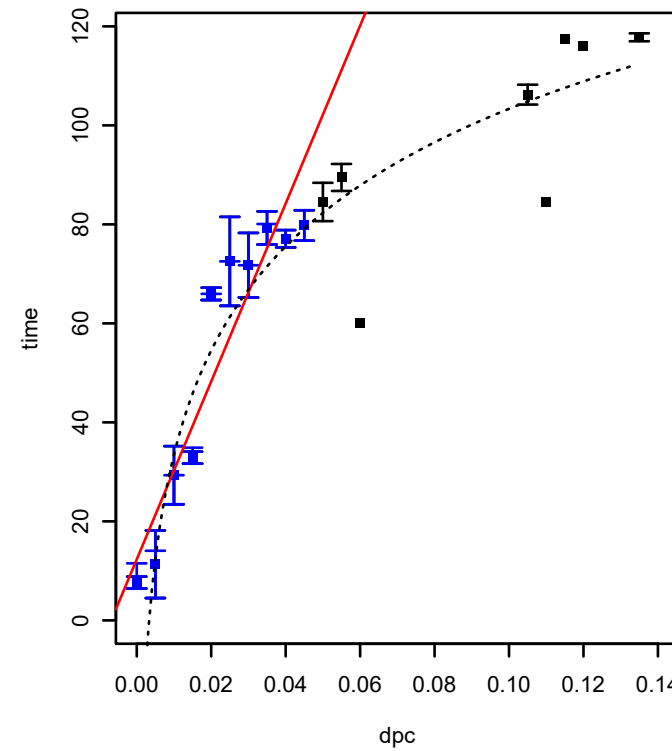**SPO3415 (COG2834) (\*HTCC2255-Basal)**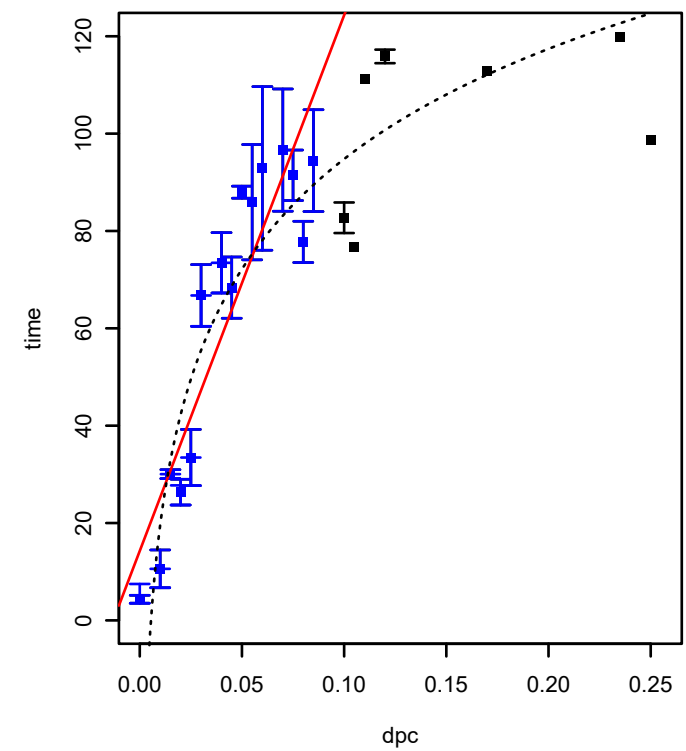

**SPO3257 (COG0335)**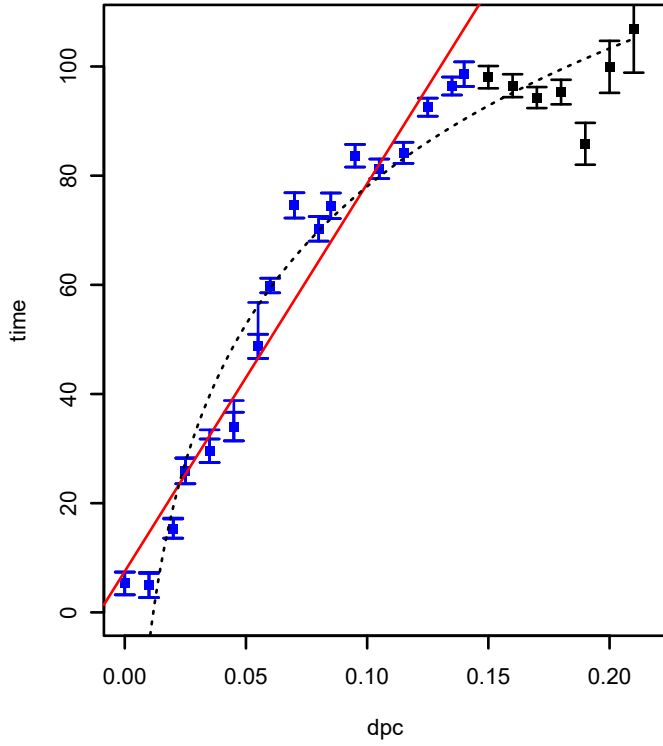**SPO2955 (COG2239) (\*HTCC2255-Basal)**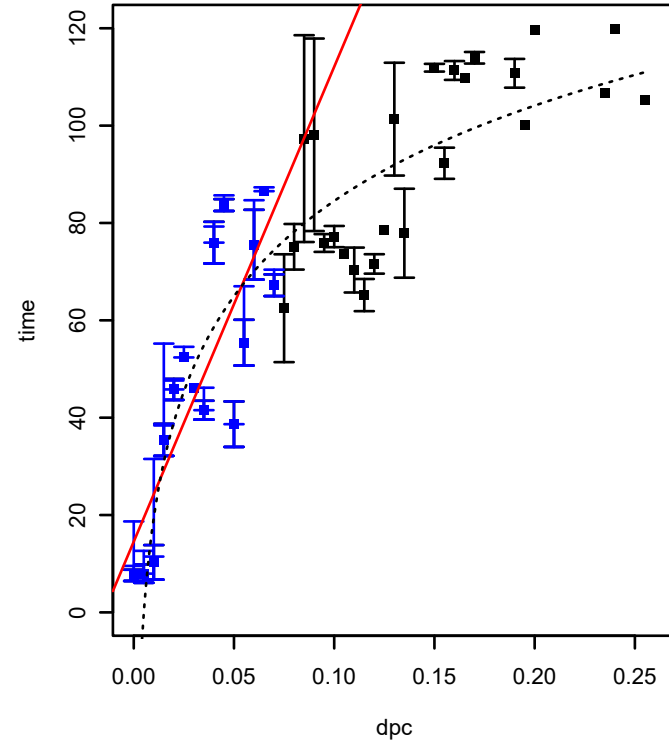**SPO2329 (COG1520) (\*HTCC2255-Basal)**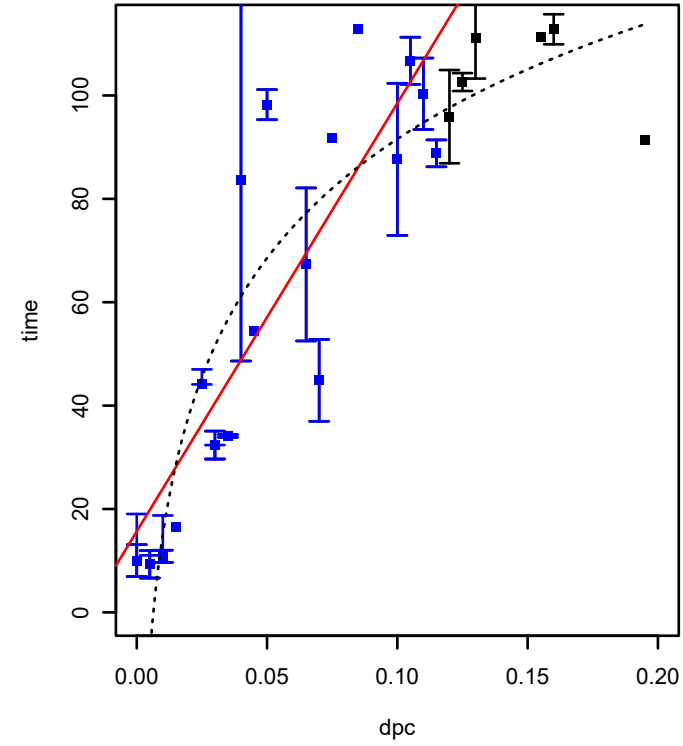**SPO2340 (COG0605) (\*HTCC2255-Basal)**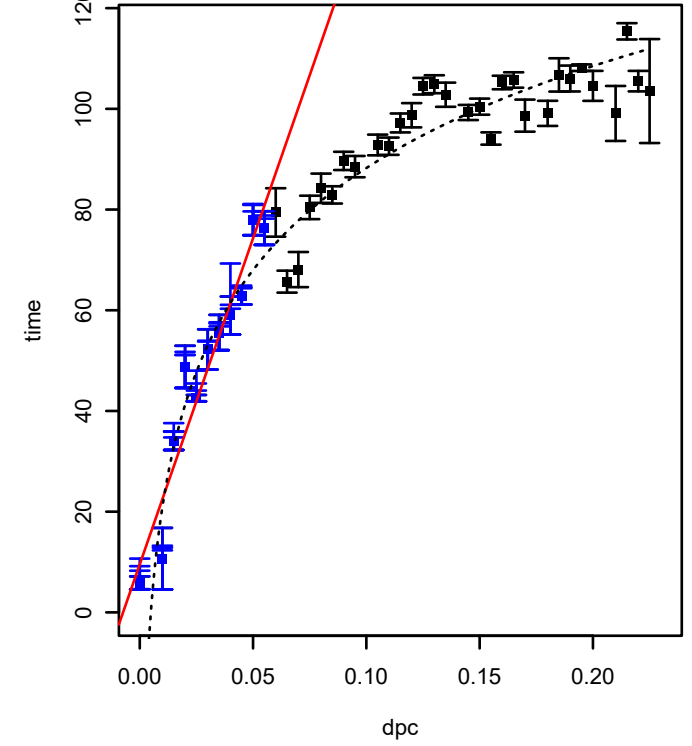**SPO1423 (COG2038)**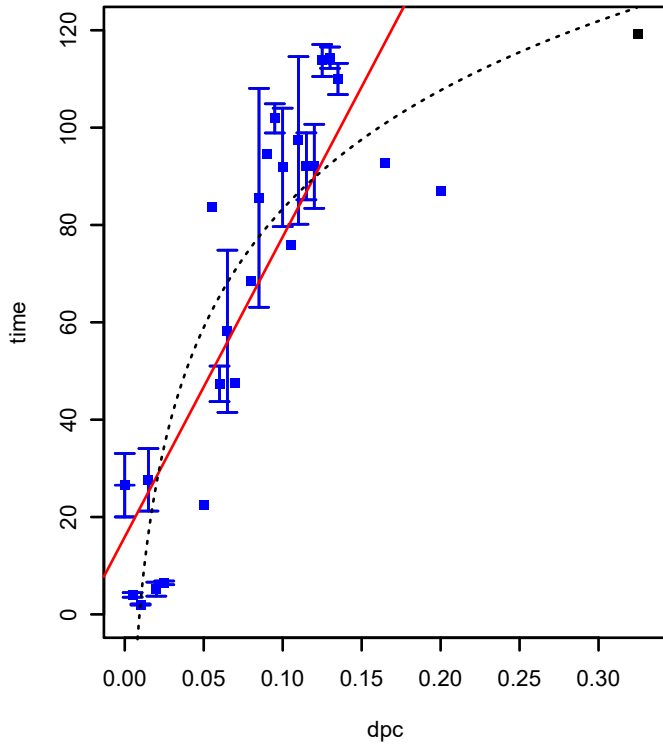**SPO1094 (COG4799)**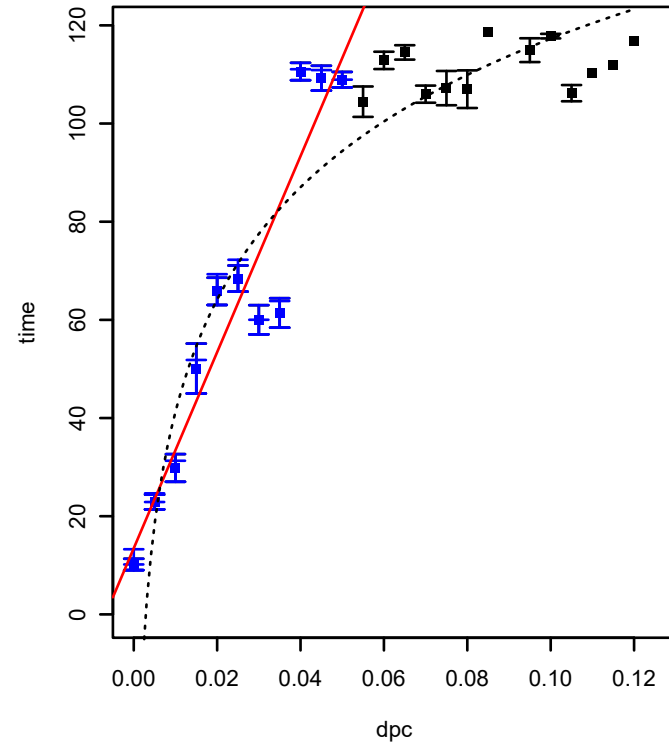**SPO0509 (COG0099) (\*HTCC2255-Basal)**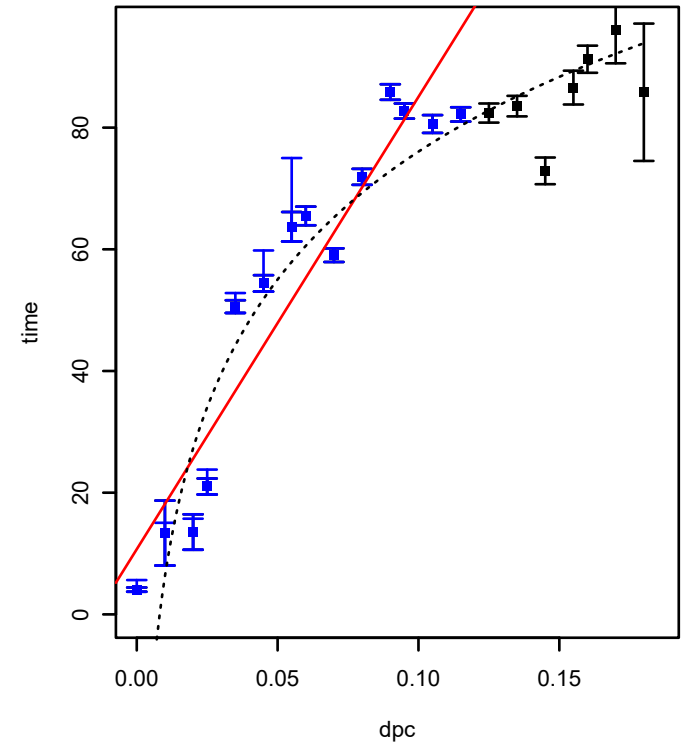**SPO1300 (COG0174)**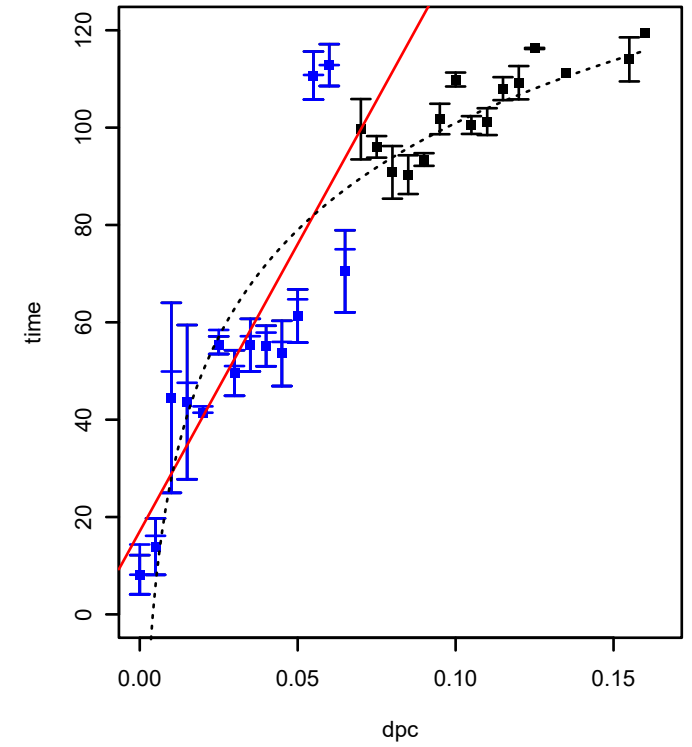

**SPO0029 (COG2265)**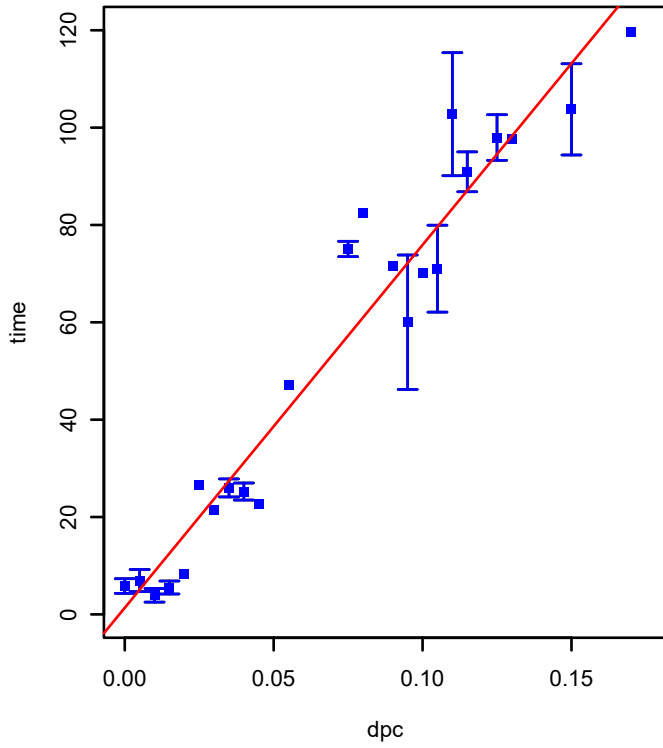**SPO3161 (COG0355)**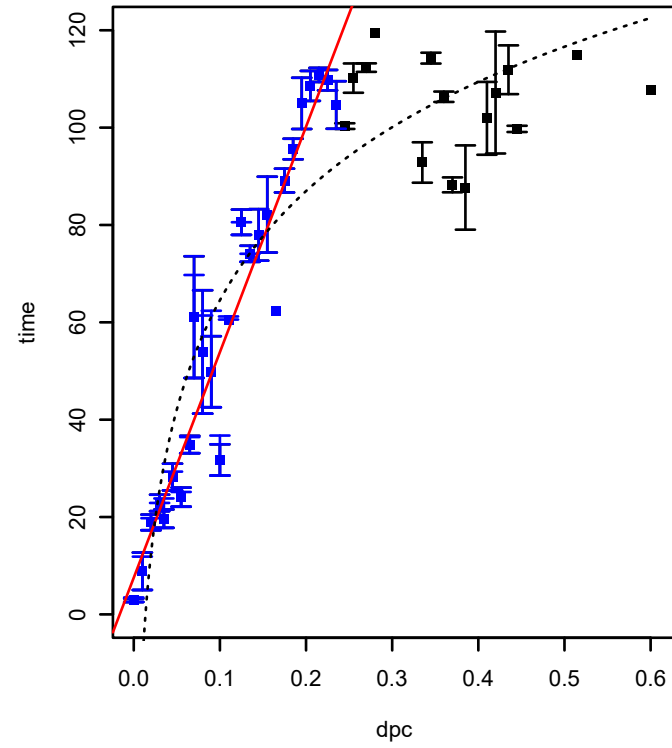**SPO1200 (COG0812) (\*HTCC2255-Basal)**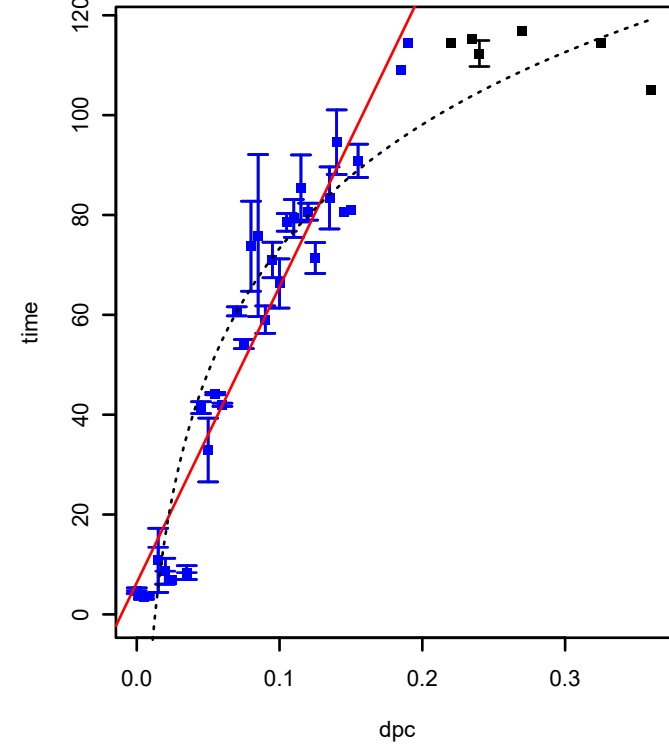**SPO1763 (COG0781) (\*HTCC2255-Basal)**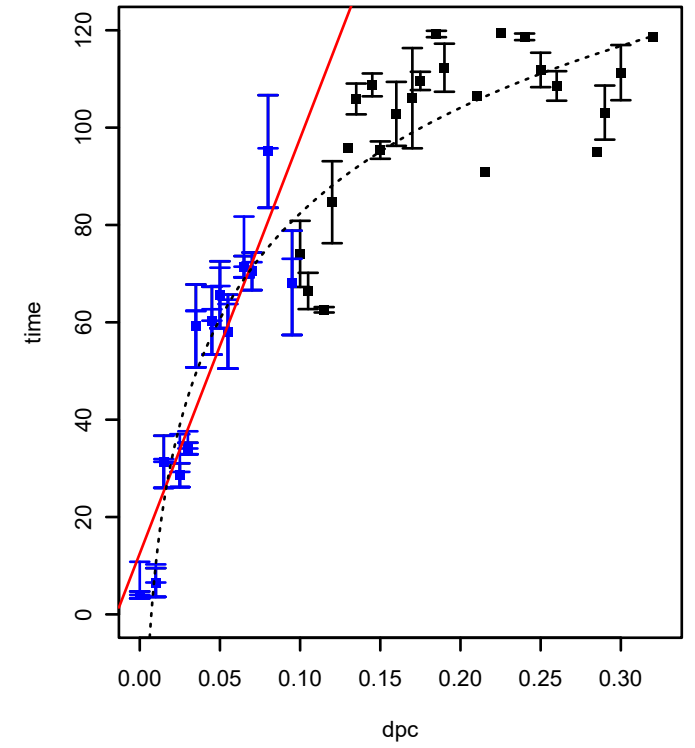**SPO3489 (COG0072)**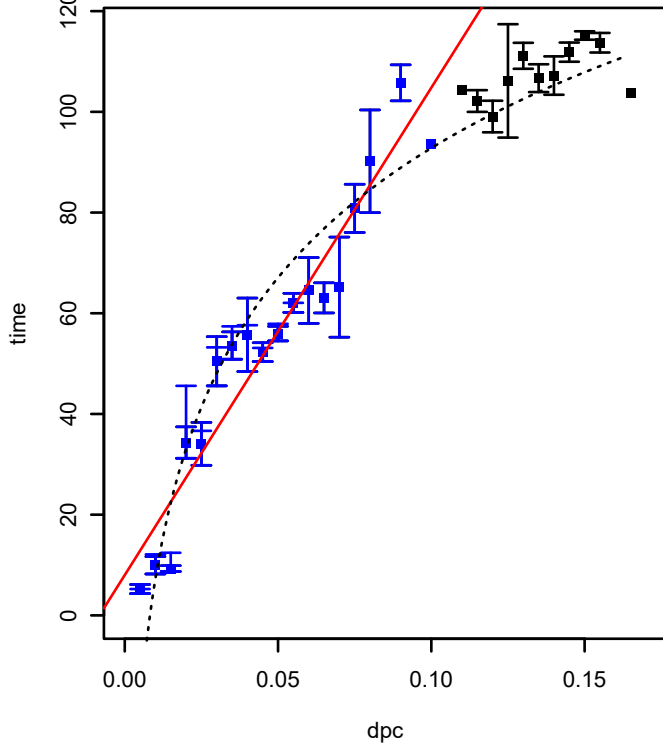**SPO0530 (COG0218) (\*HTCC2255-Basal)**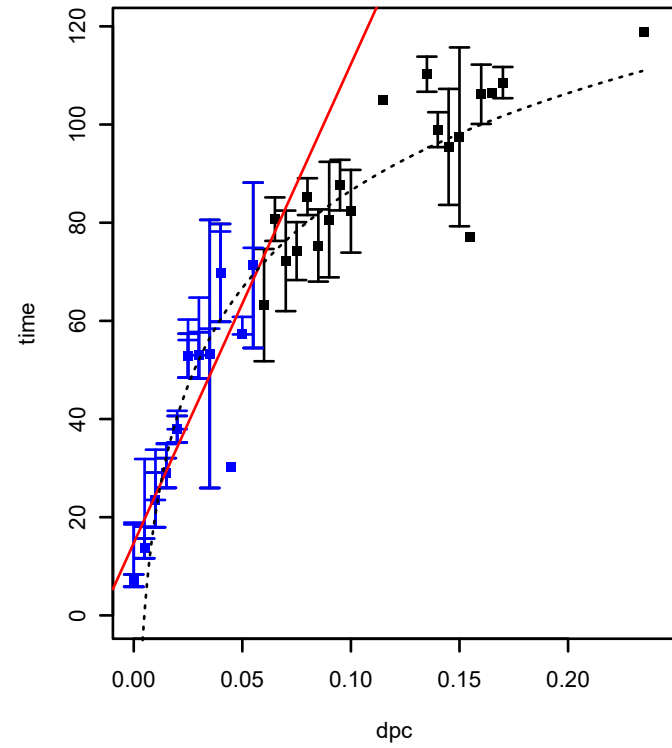**SPO3863 (COG1896) (\*HTCC2255-Basal)**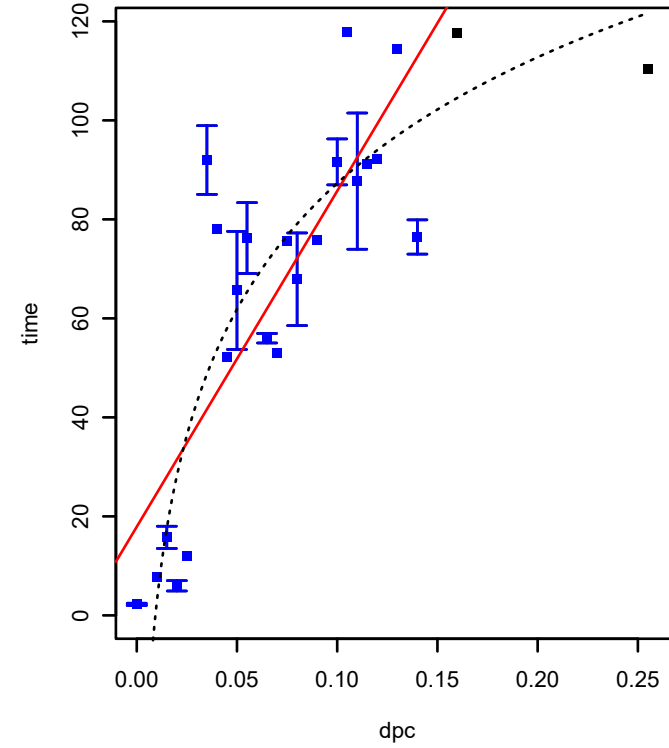**SPO3130 (COG4974) (\*HTCC2255-Basal)**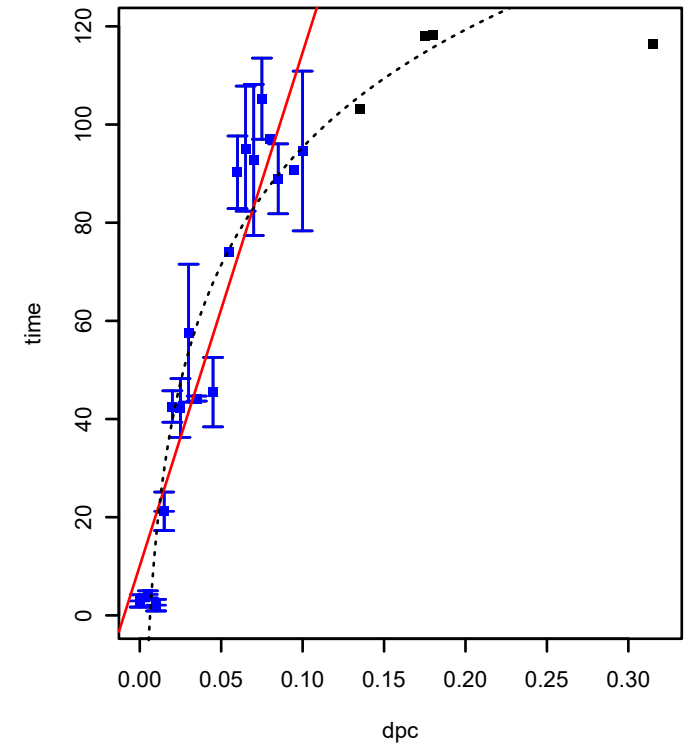

**SPO3447 (COG5389) (\*HTCC2255-Basal)**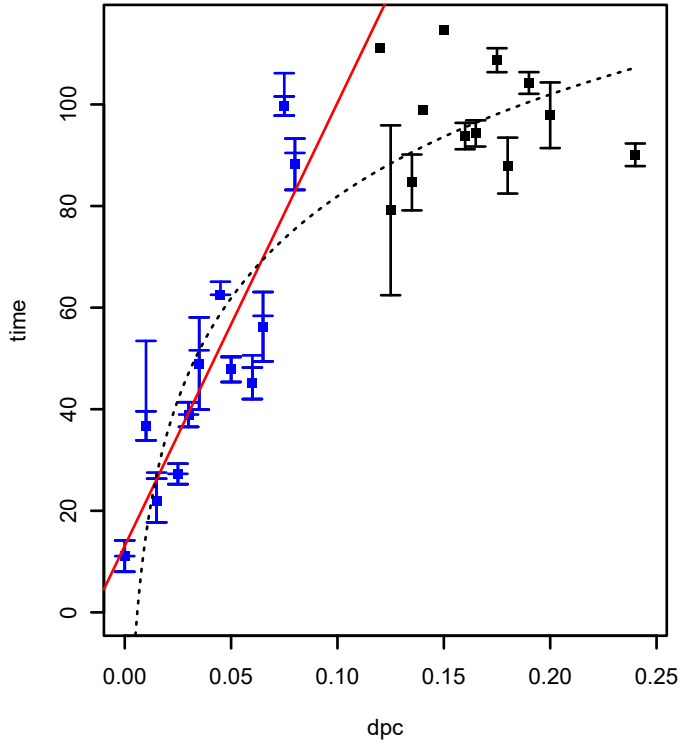**SPO3510 (COG0244)**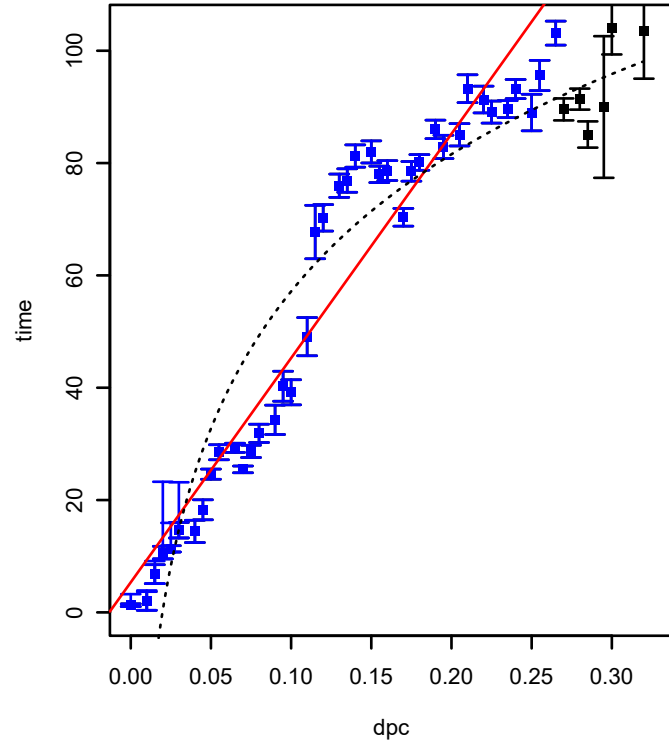**SPO2087 (COG2204) (\*HTCC2255-Basal)**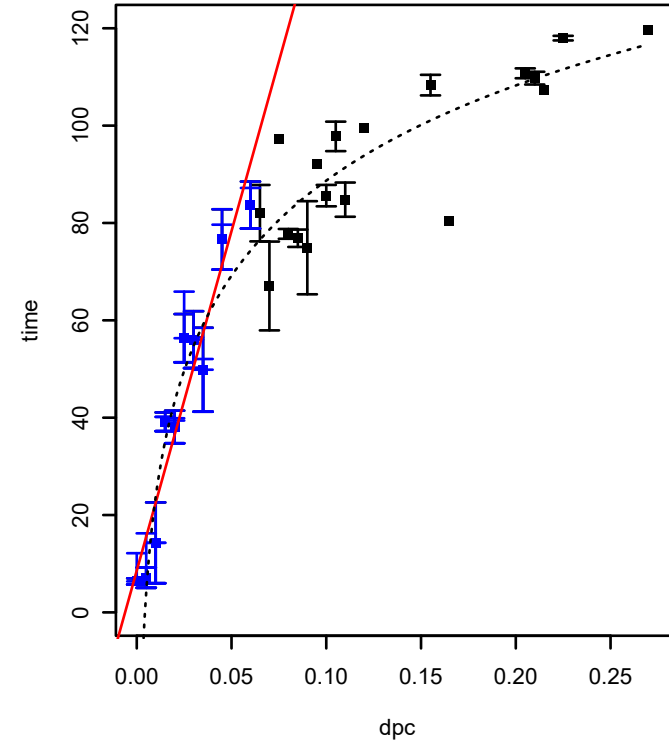**SPO0140 (COG3816)**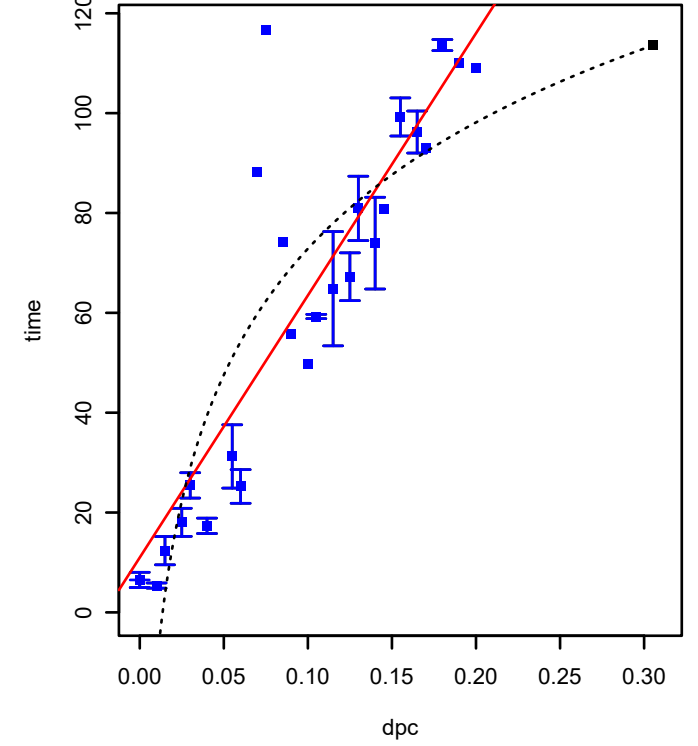**SPO2033 (COG0013)**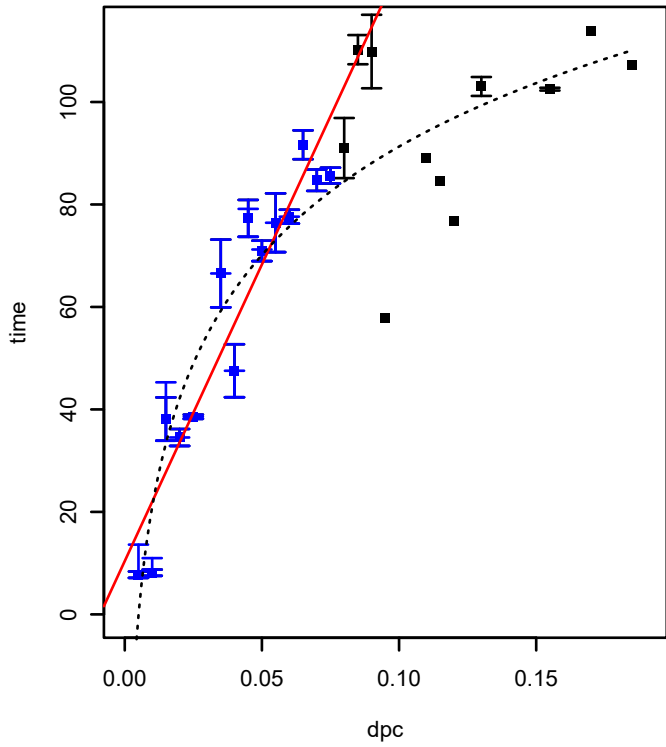**SPO3193 (COG5458) (\*HTCC2255-Basal)**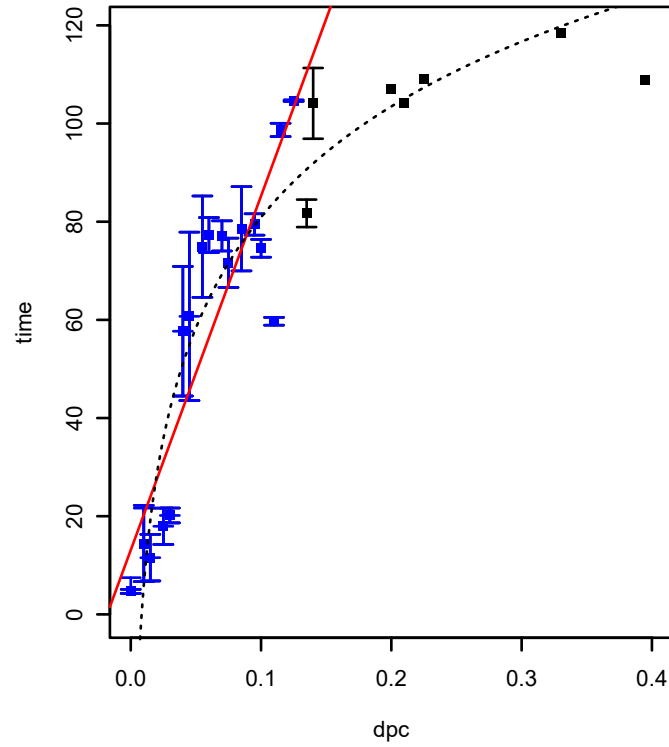**SPO1684 (COG0139)**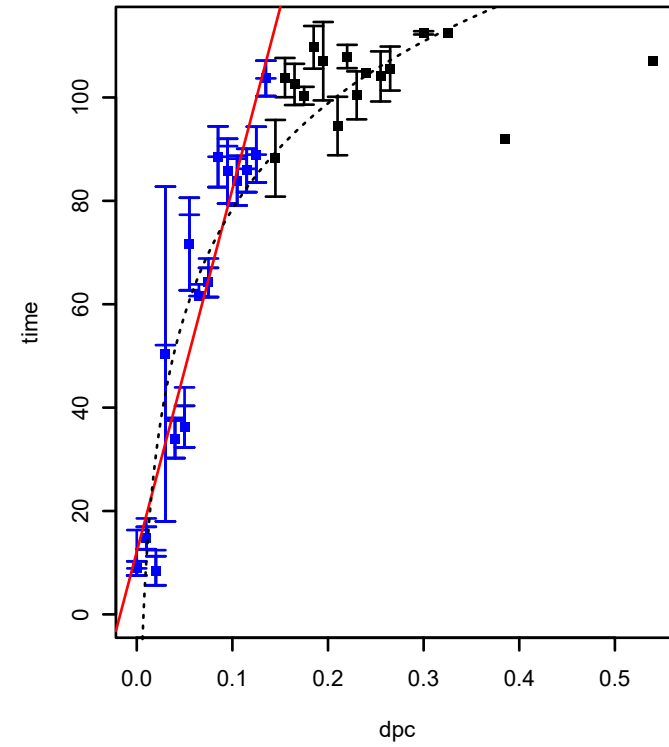**SPO3220 (COG1168)**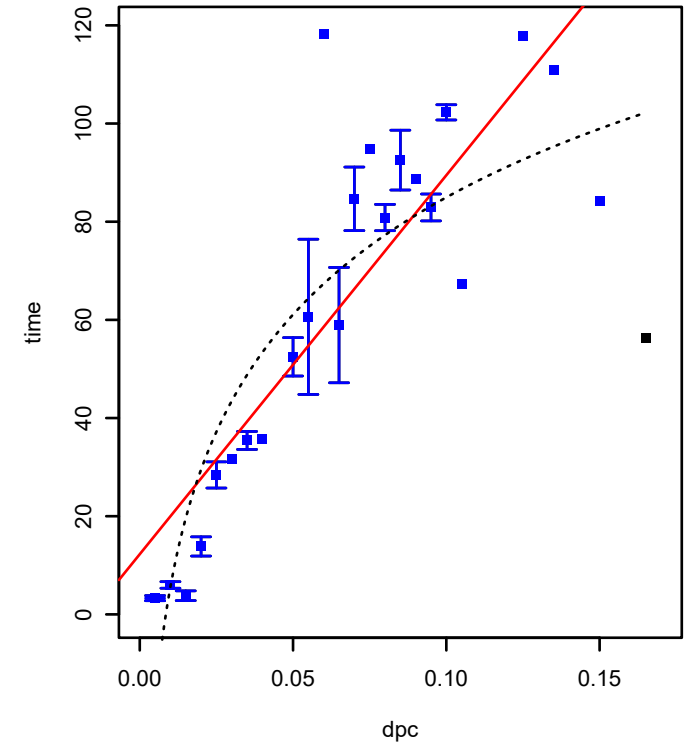

**SPO3882 (COG1220) (\*HTCC2255-Basal)**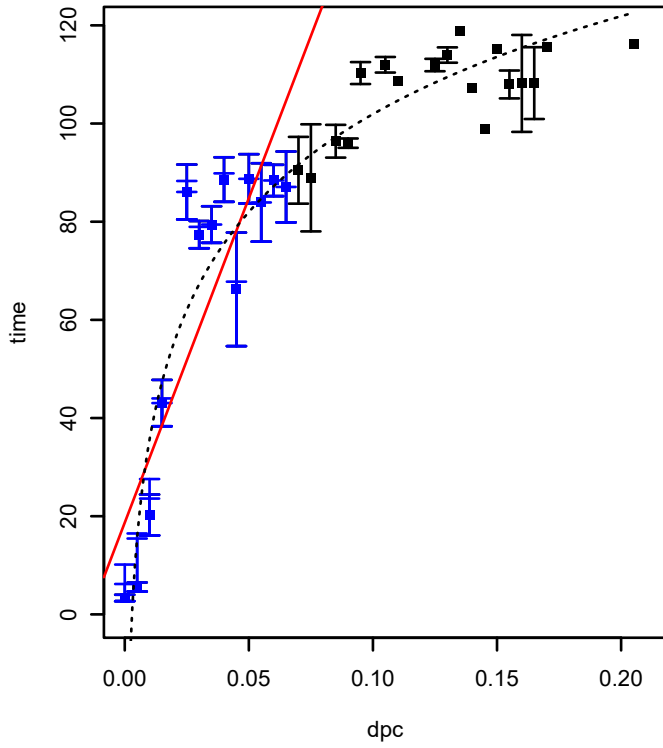**SPO3569 (COG0353) (\*HTCC2255-Basal)**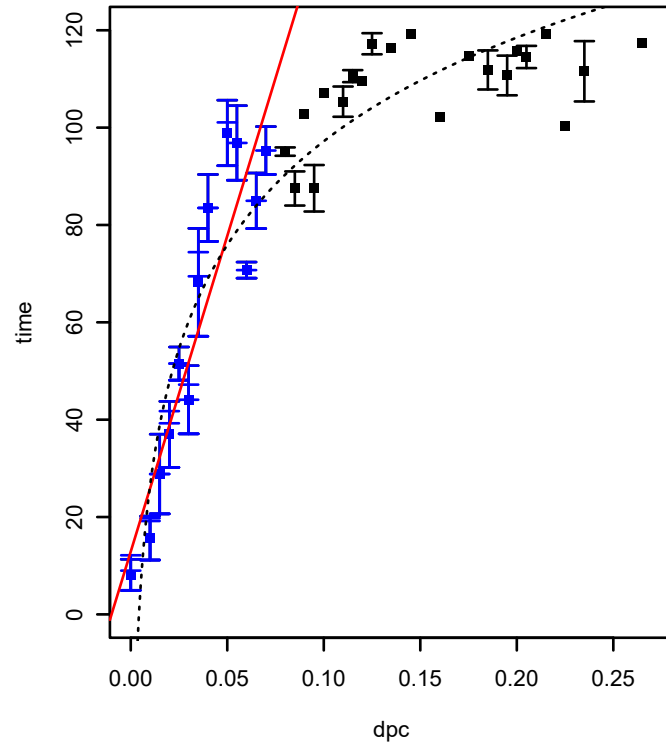**SPO1692 (COG0103)**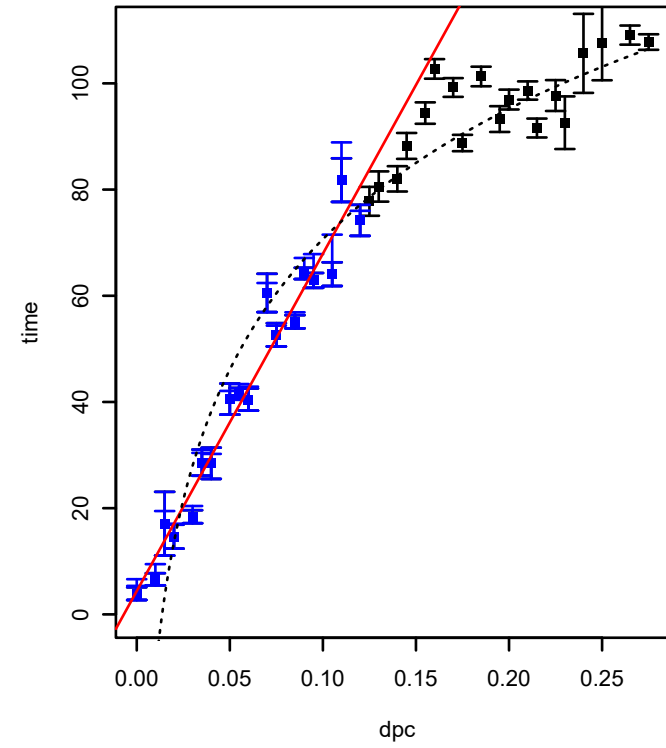**SPO0334 (COG0019)**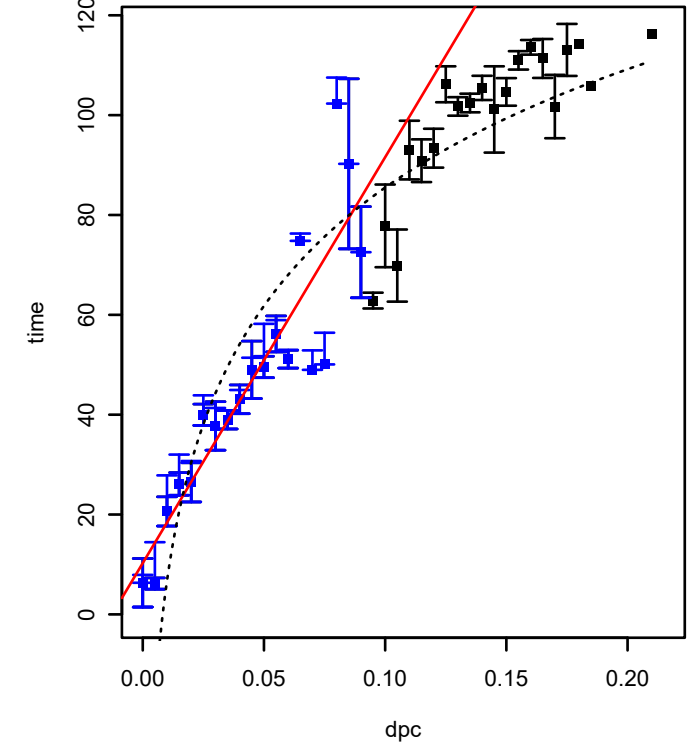**SPO0007 (COG0127) (\*HTCC2255-Basal)**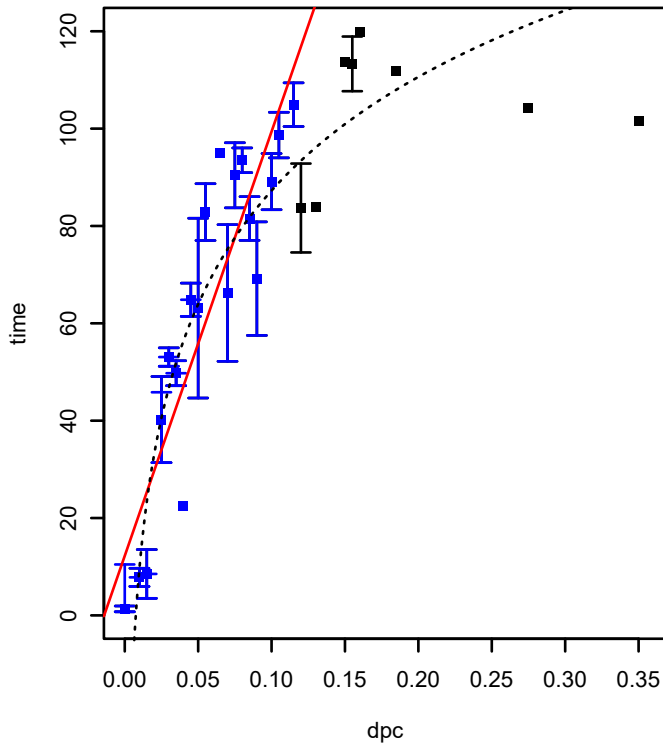**SPO3429 (COG0325) (\*HTCC2255-Basal)**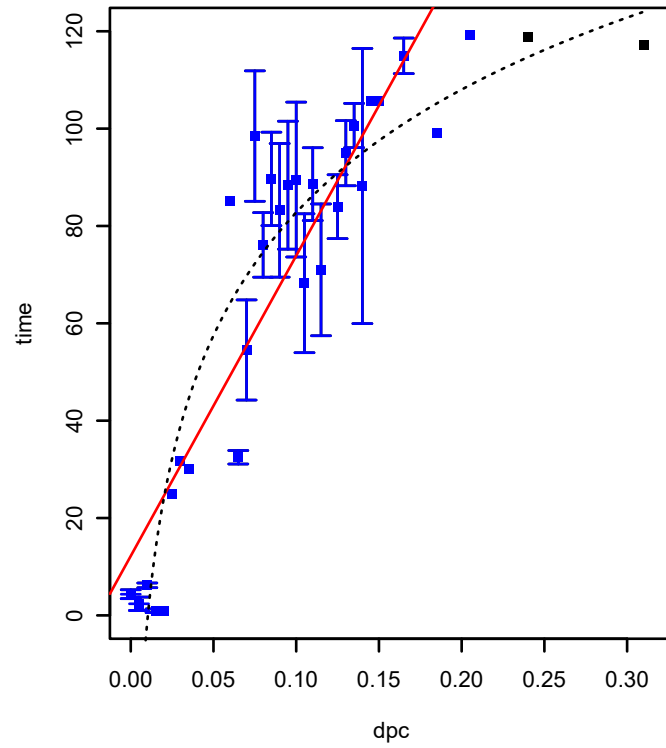**SPO3855 (COG0240) (\*HTCC2255-Basal)**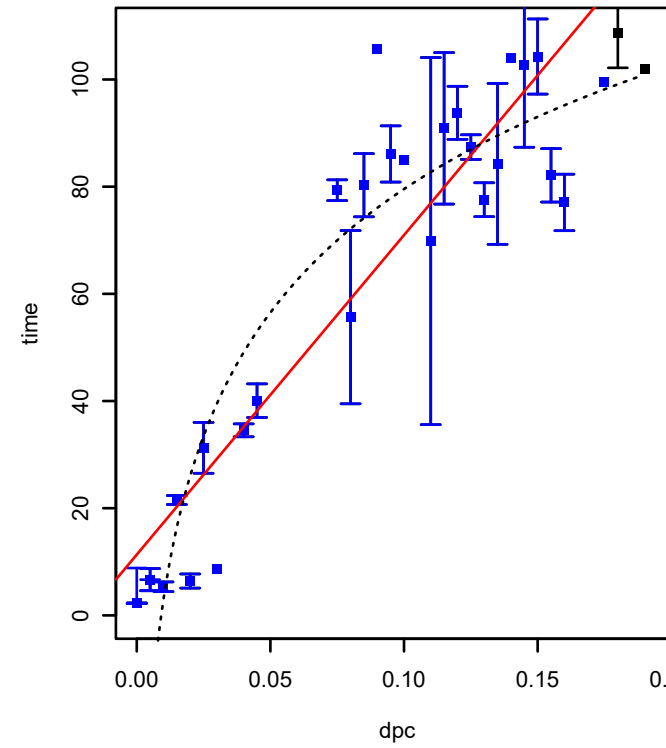**SPO3234 (COG0711)**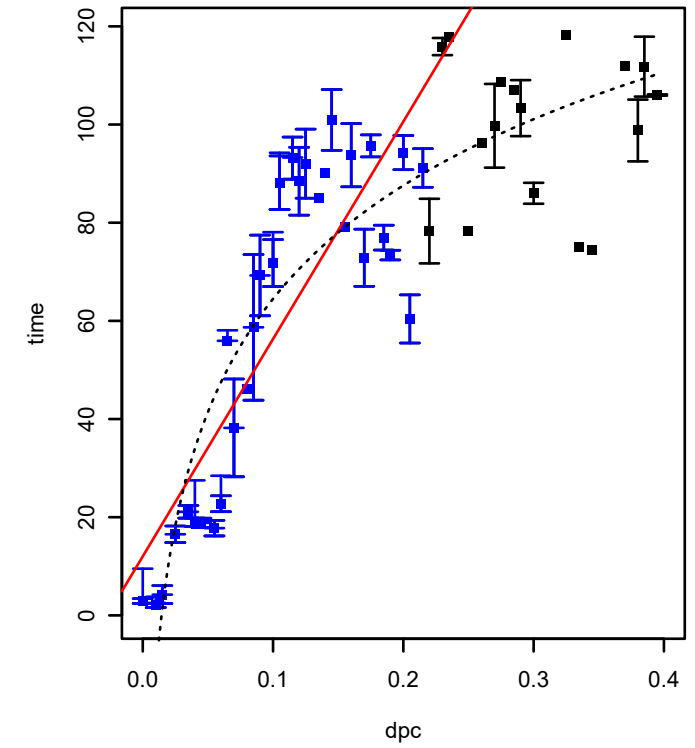

**SPO3452 (COG0164) (\*HTCC2255-Basal)**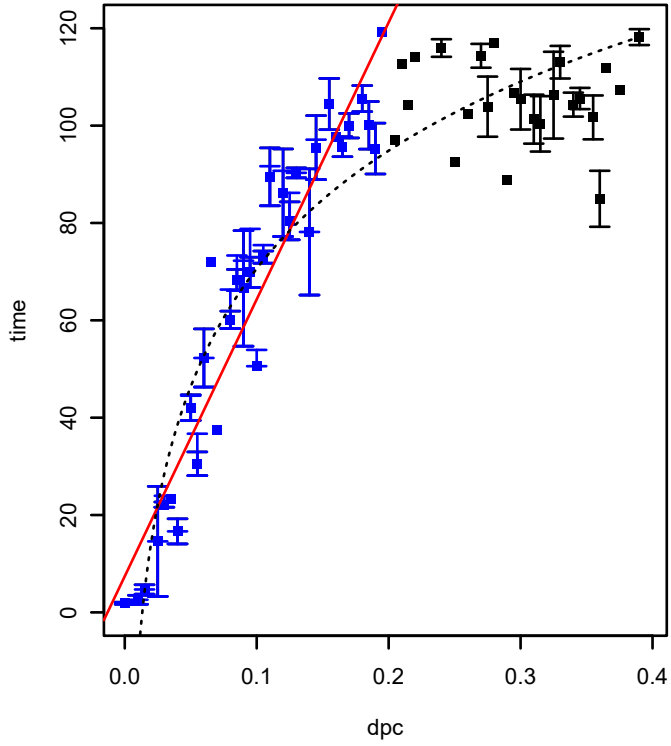**SPO0393 (COG0705) (\*HTCC2255-Basal)**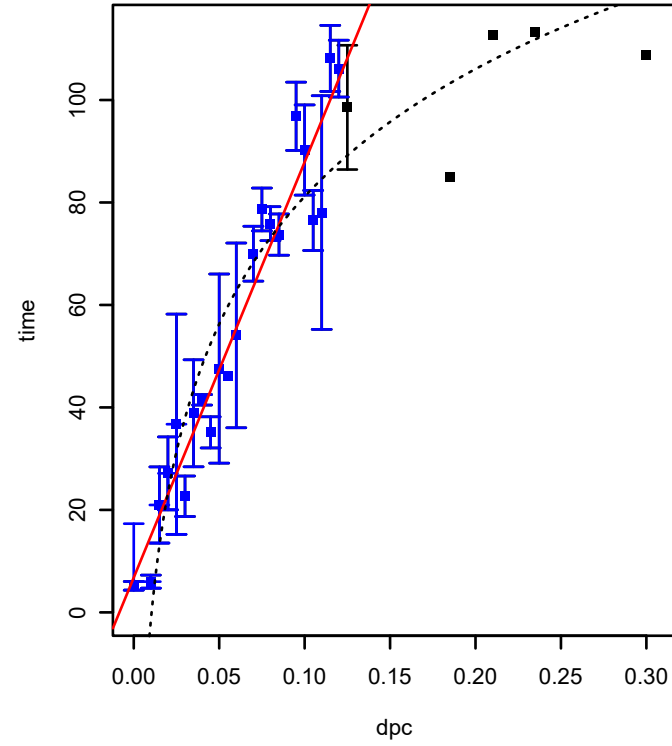**SPO1976 (COG0052) (\*HTCC2255-Basal)**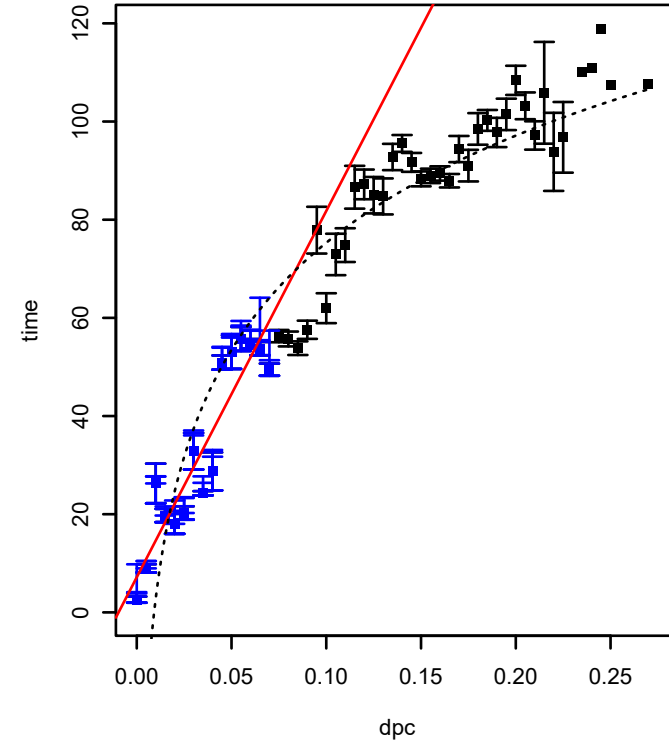**SPO3278 (COG0284) (\*HTCC2255-Basal)**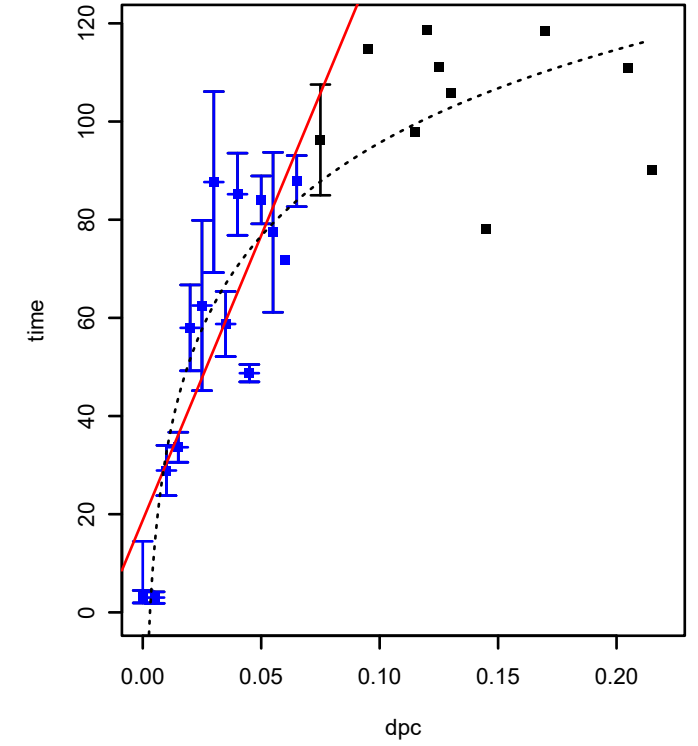**SPO2314 (COG0526)**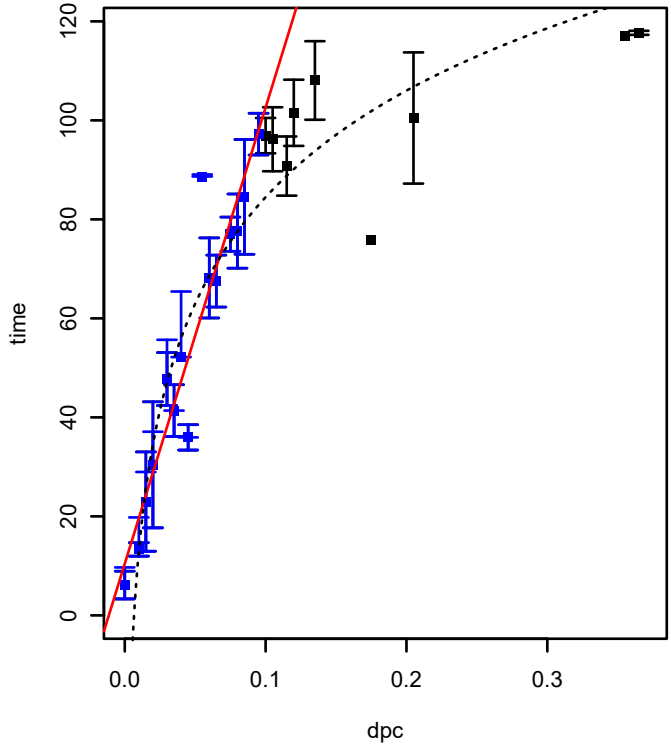**SPO1881 (COG3088)**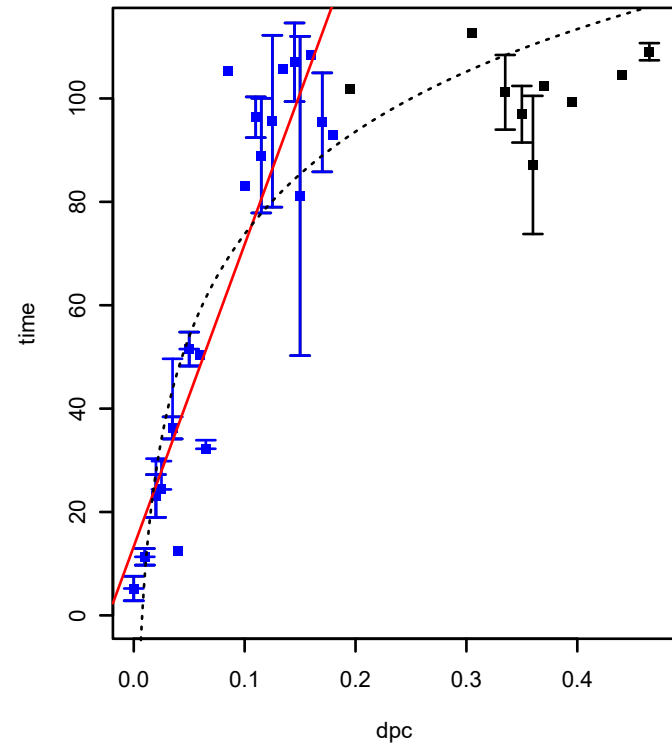**SPO3732 (COG3146) (\*HTCC2255-Basal)**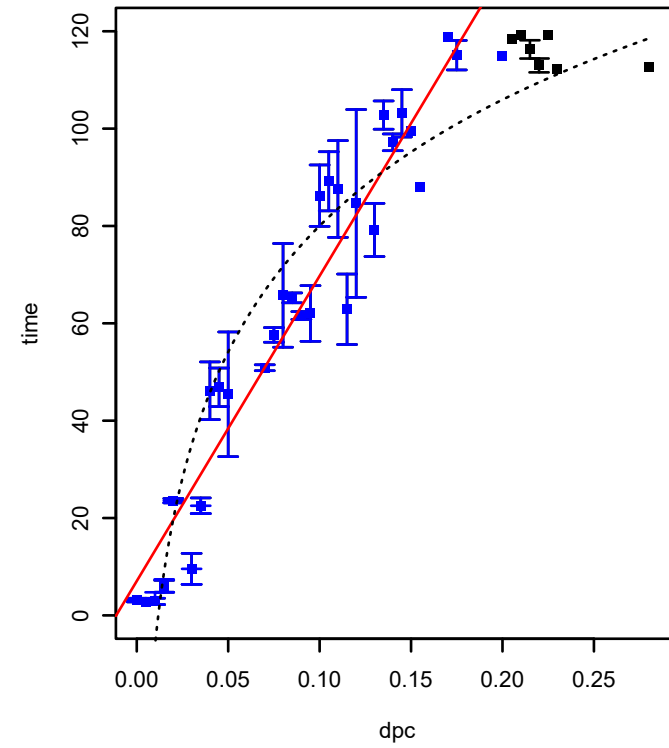**SPOA0437 (COG1011)**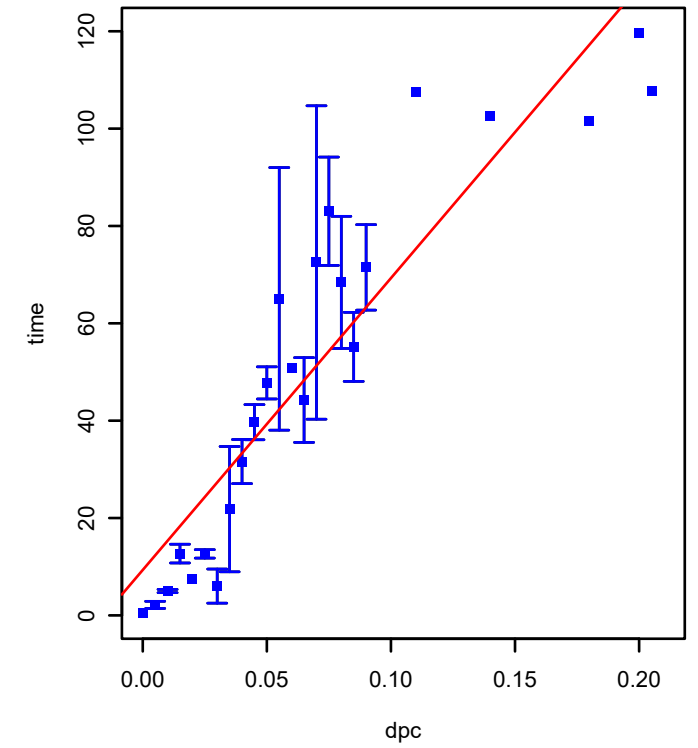



**SPO0312 (COG0782) (\*HTCC2255-Basal)**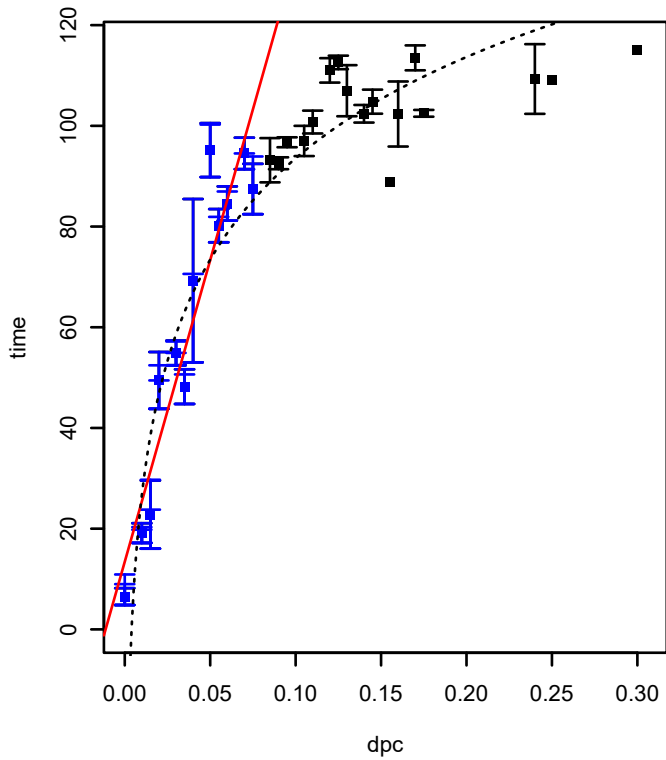**SPO2953 (COG1692) (\*HTCC2255-Basal)**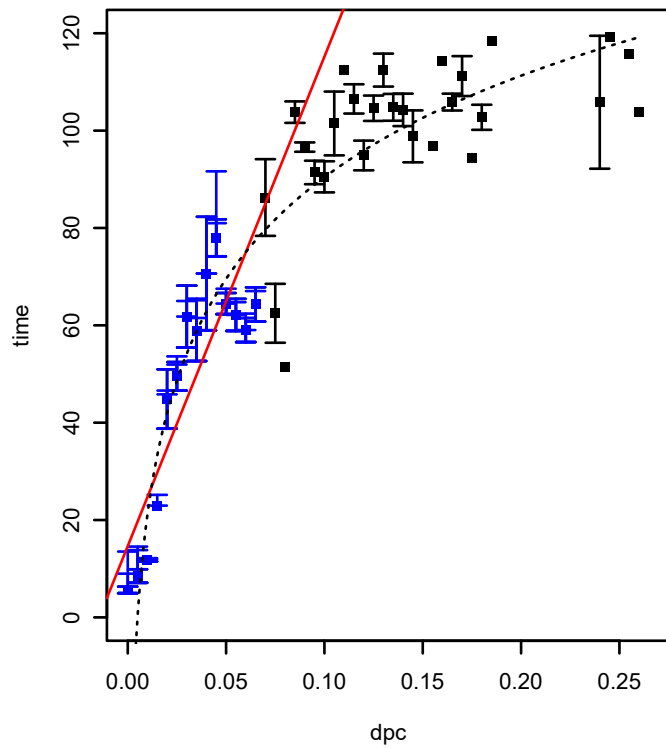**SPO0008 (COG0689) (\*HTCC2255-Basal)**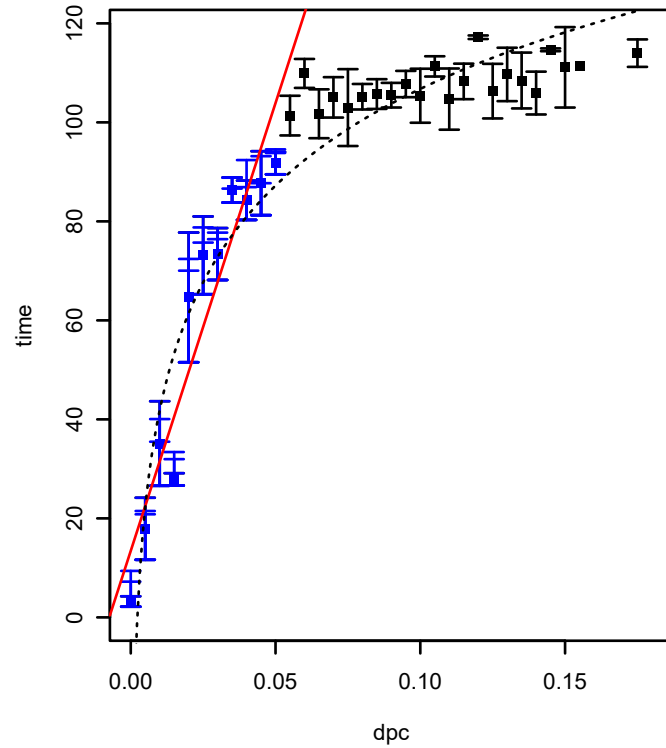**SPO1358 (COG0751)**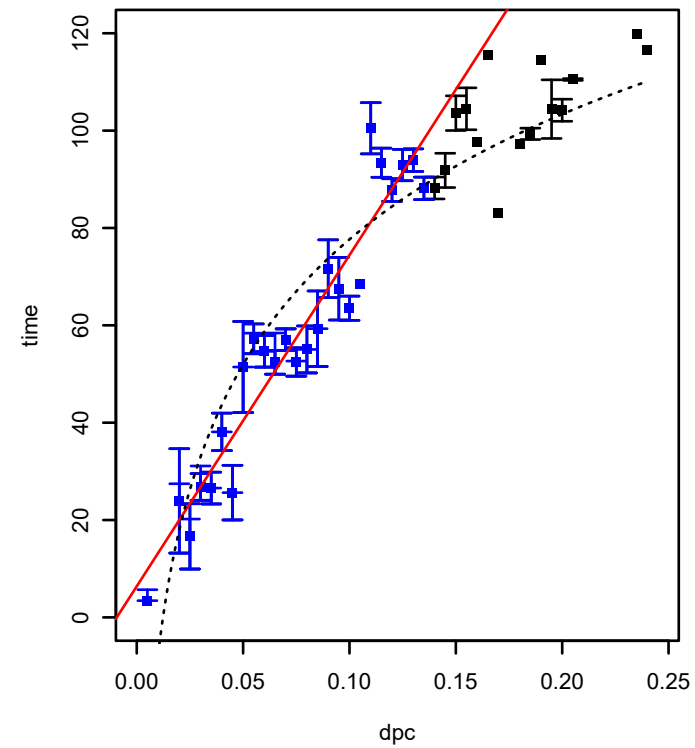**SPO1759 (COG0307) (\*HTCC2255-Basal)**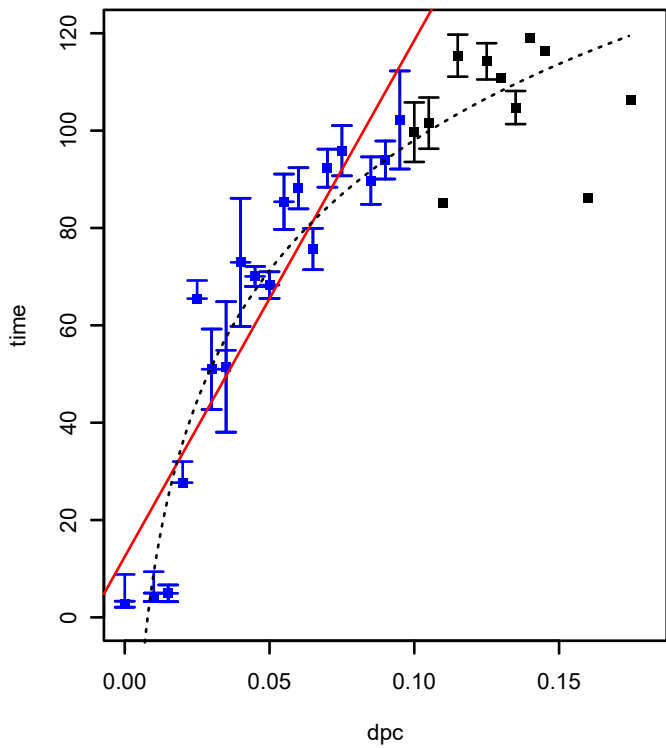**SPO\_RS11770 (COG1862)**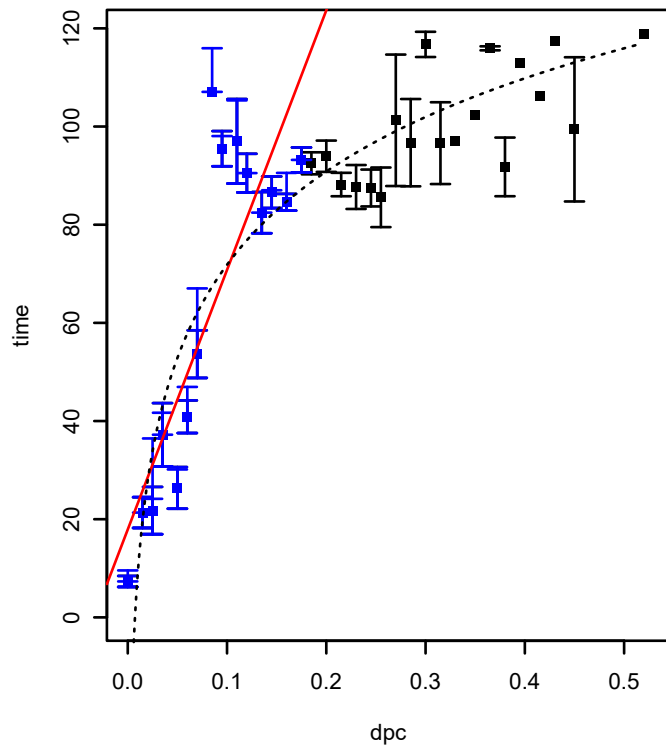**SPO0144 (COG0661) (\*HTCC2255-Basal)**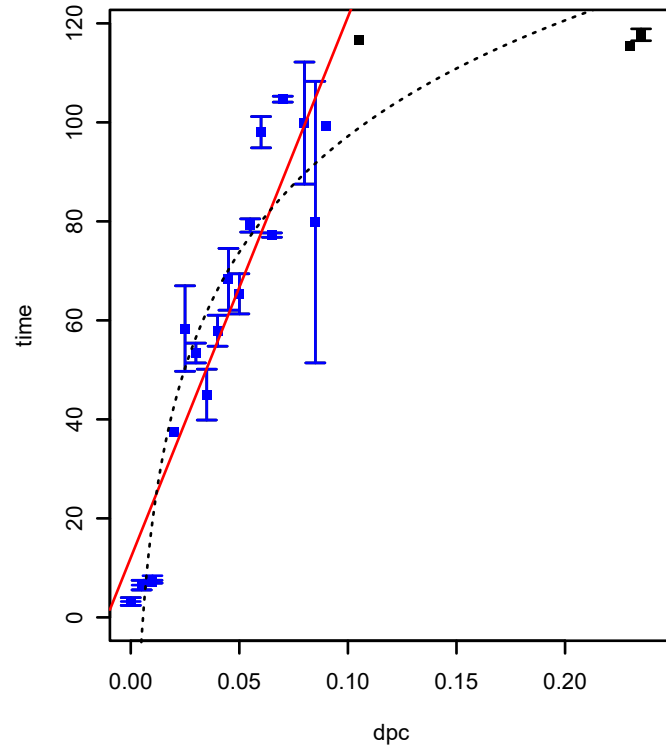**SPO0039 (COG1218) (\*HTCC2255-Basal)**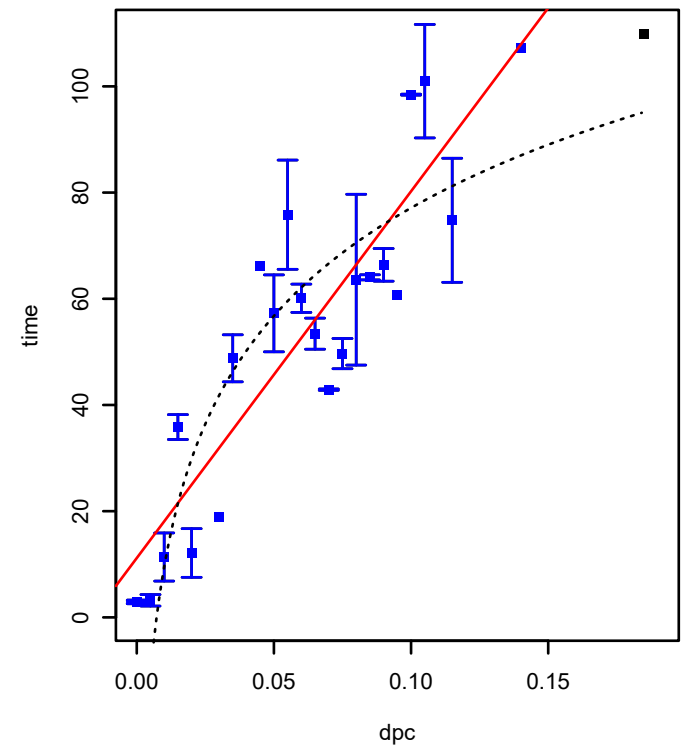

**SPO2469 (COG3956) (\*HTCC2255-Basal)**

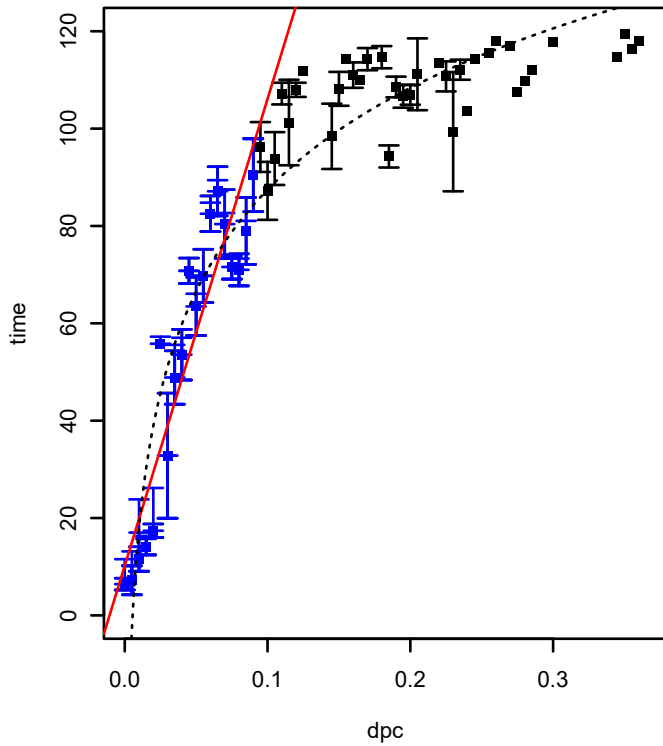

**SPO1313 (NA) (\*HTCC2255-Basal)**

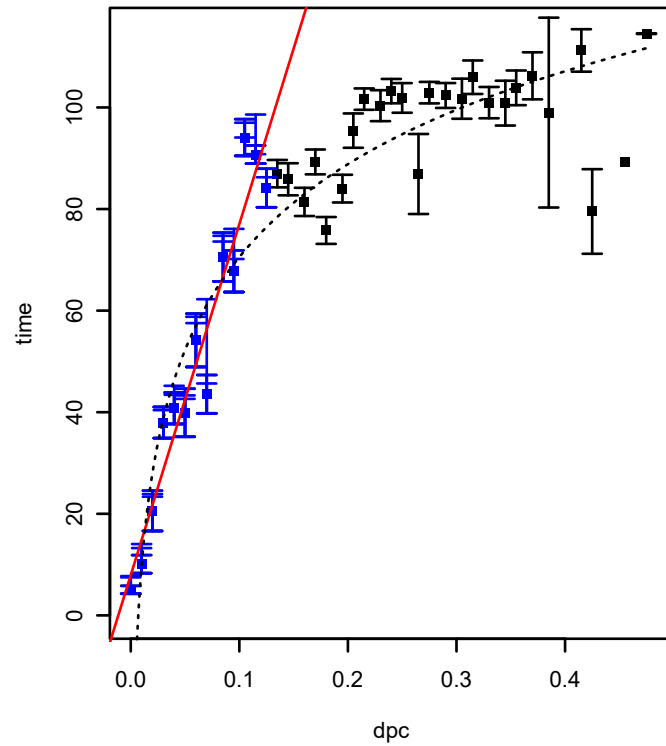

**SPO0500 (COG0097)**

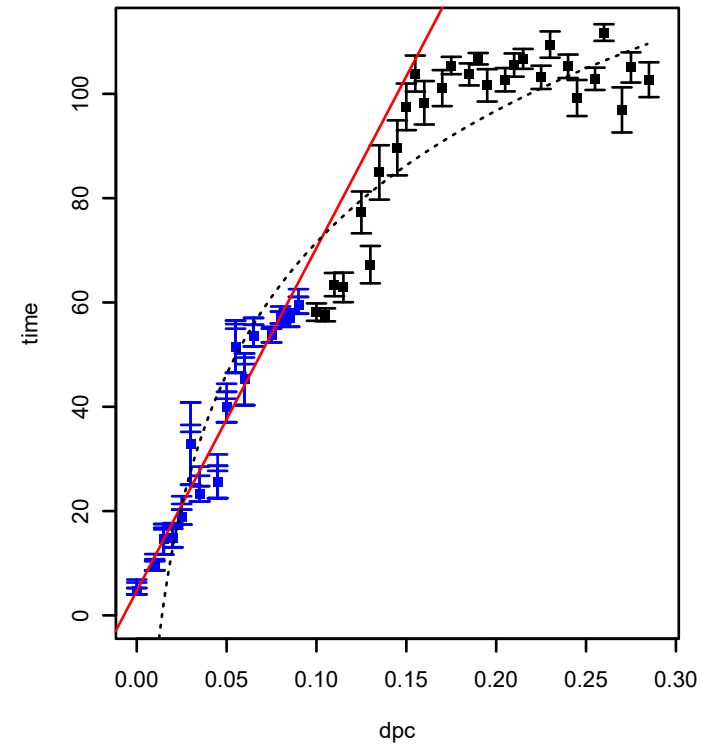

**SPOA0137 (COG0766)**

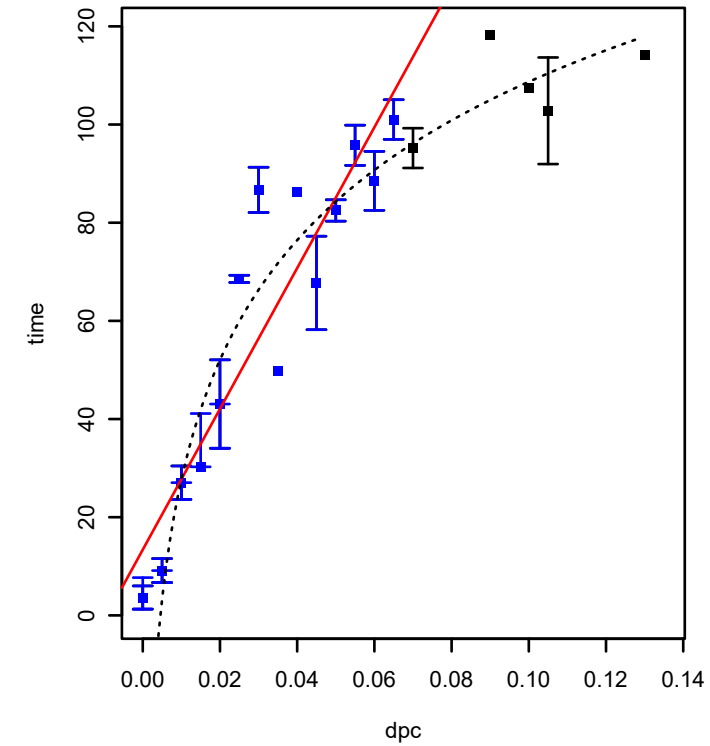

**SPO3422 (COG2802) (\*HTCC2255-Basal)**

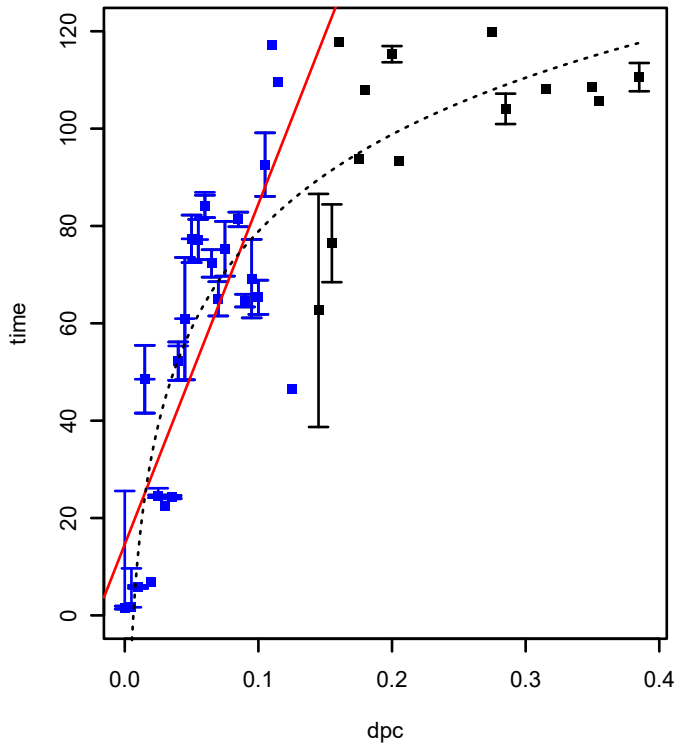

**SPO3884 (COG2840) (\*HTCC2255-Basal)**

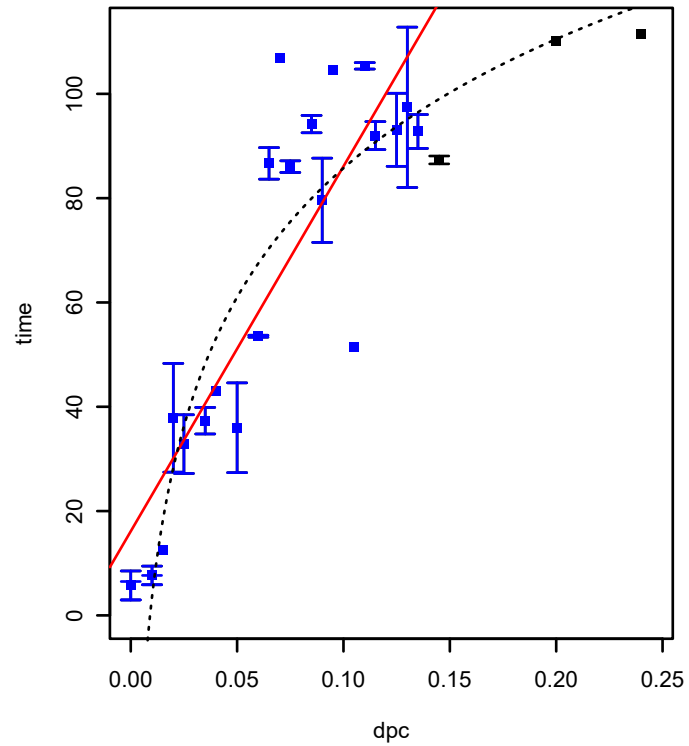

**SPO1389 (COG0321) (\*HTCC2255-Basal)**

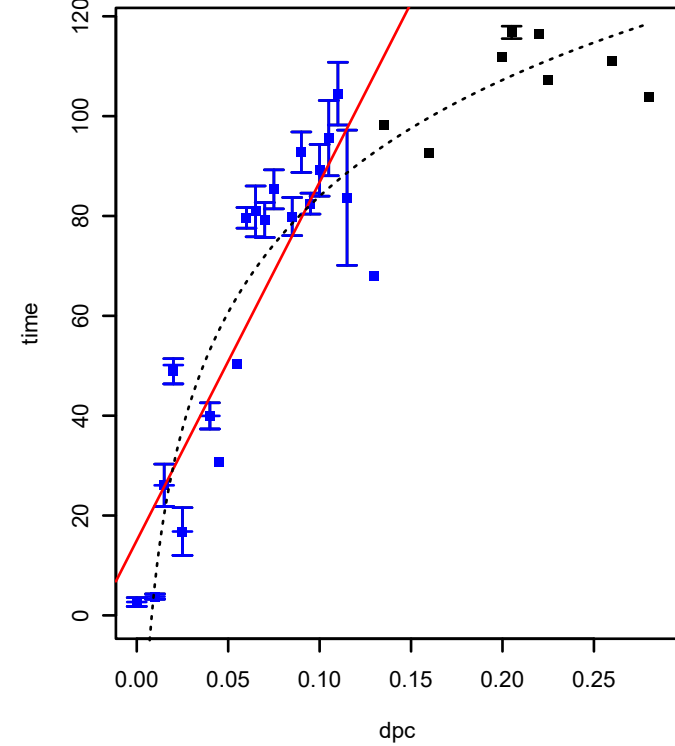

**SPO2796 (COG0546)**

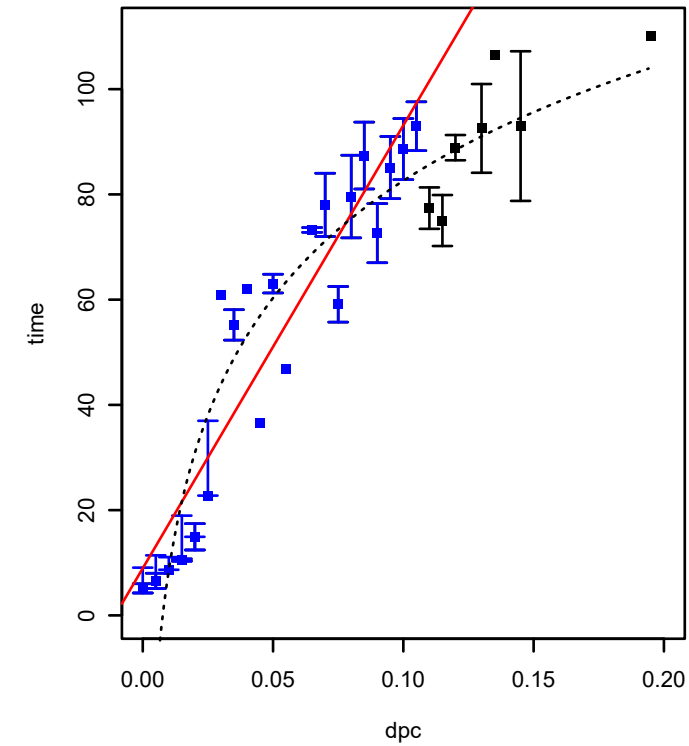

**SPO2751 (COG0546) (\*HTCC2255-Basal)**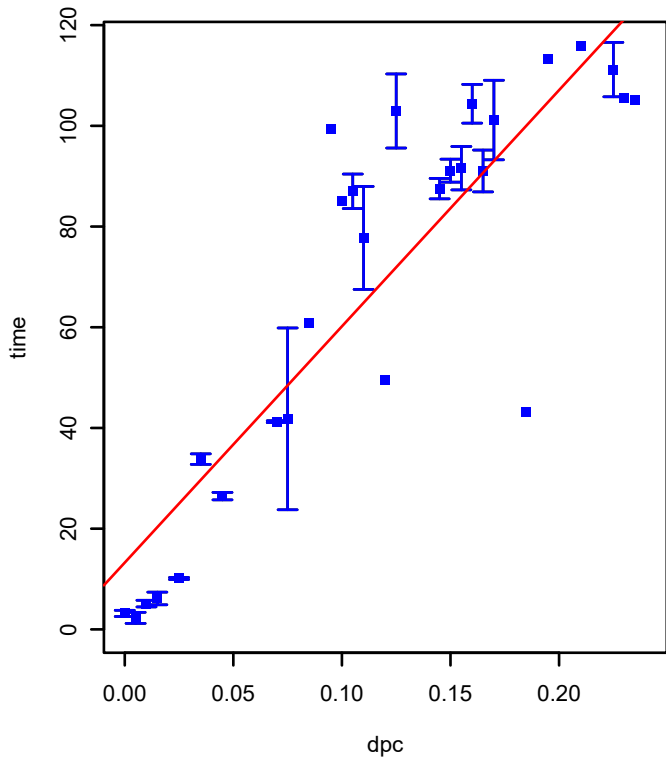**SPO3373 (COG0597) (\*HTCC2255-Basal)**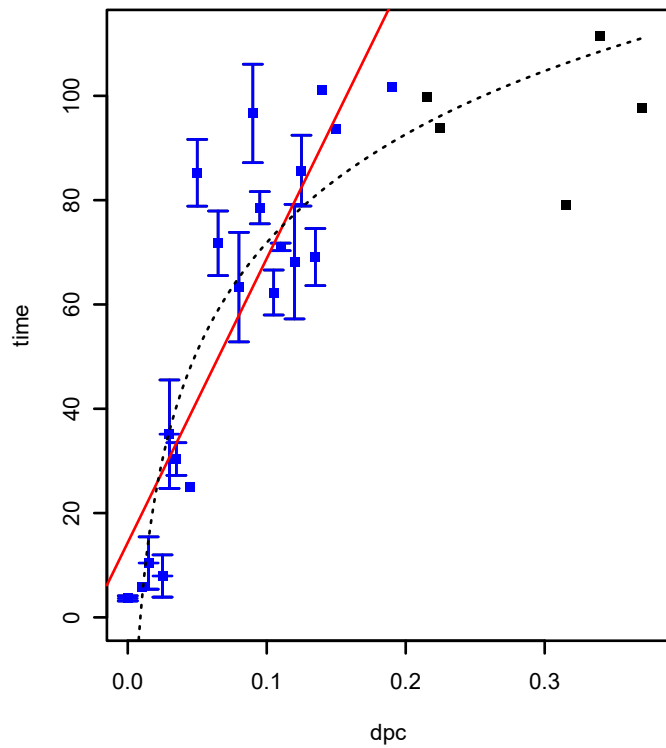**SPO0669 (COG0040) (\*HTCC2255-Basal)**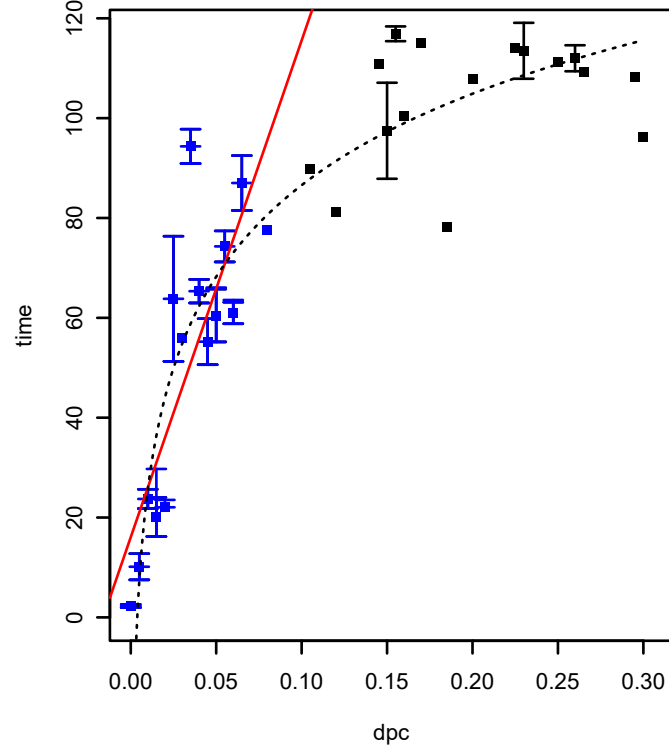**SPO0392 (COG0180)**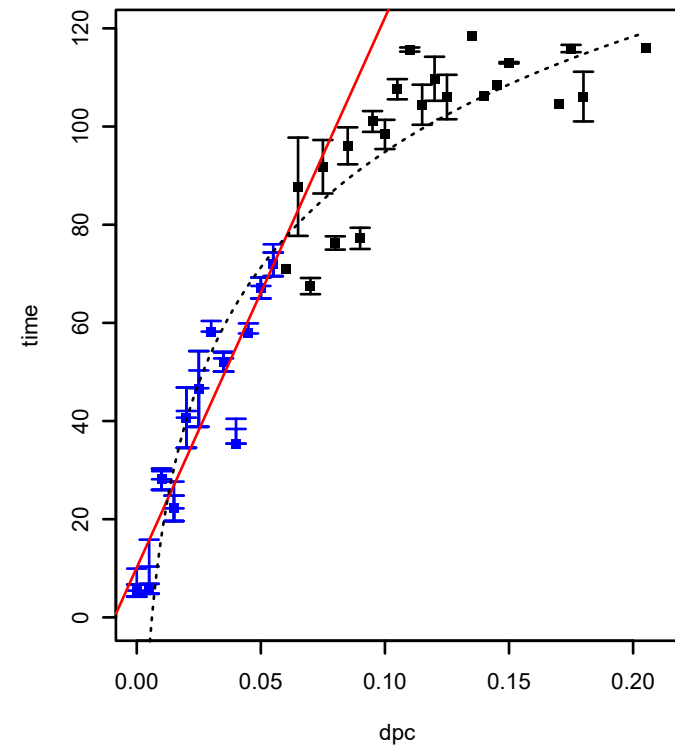**SPO3072 (COG3346) (\*HTCC2255-Basal)**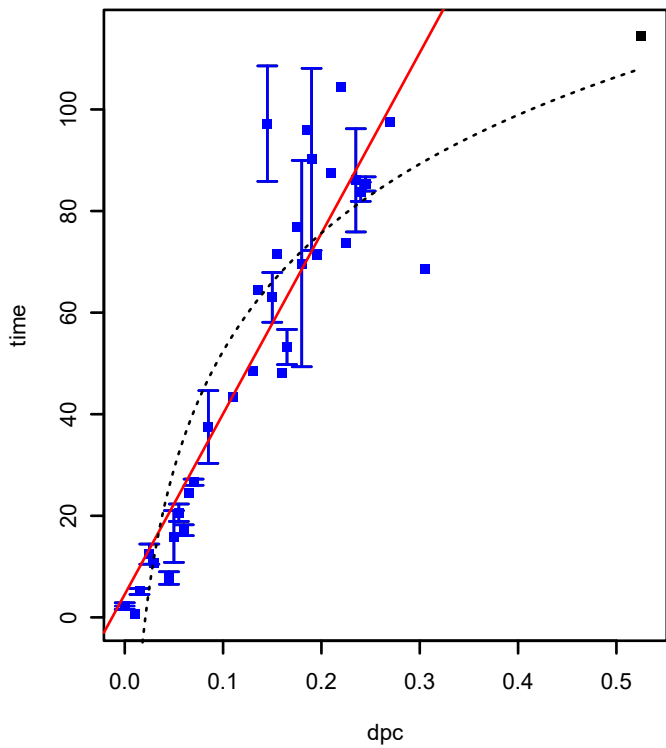**SPO1304 (COG4160)**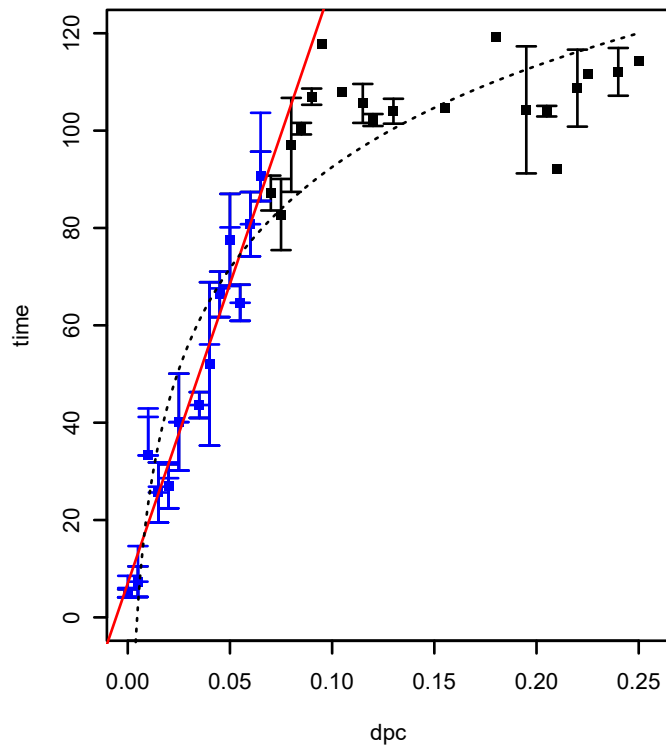**SPO3073 (COG1845)**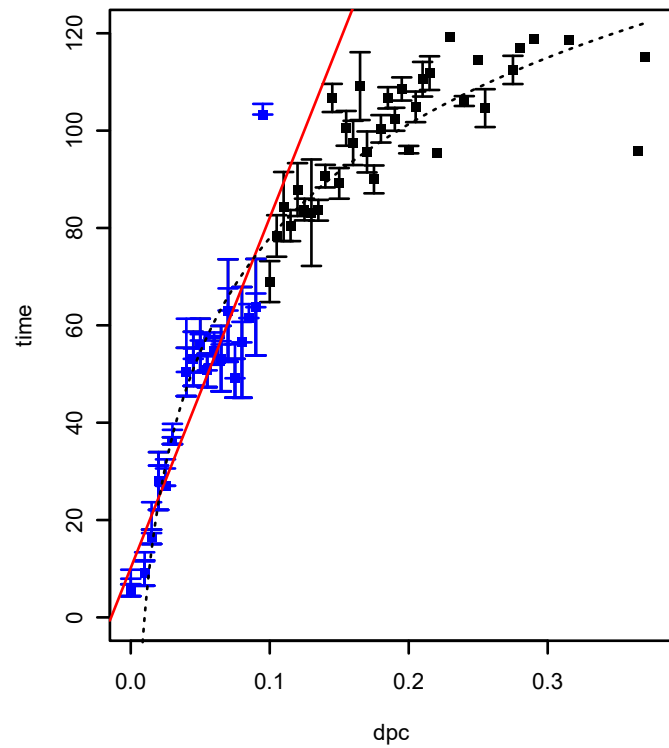**SPO1246 (COG0354) (\*HTCC2255-Basal)**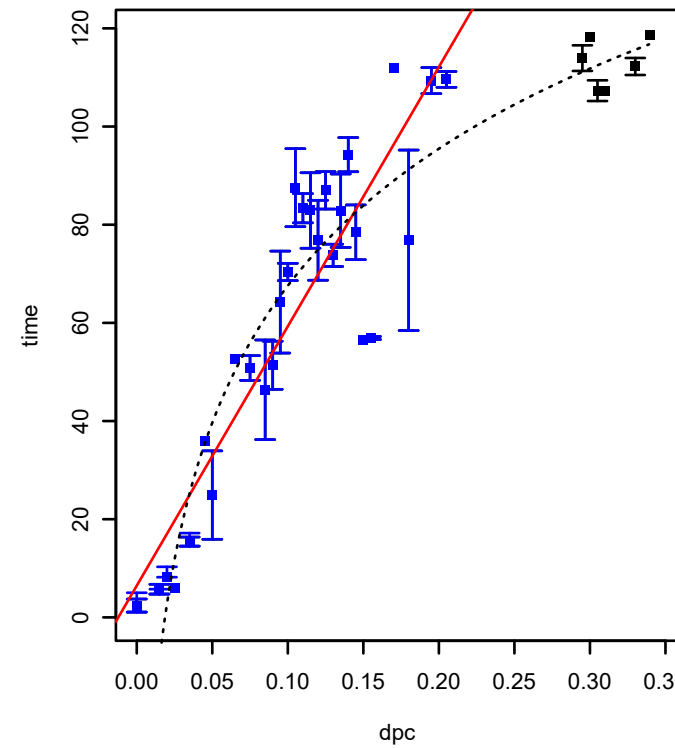

**SPO0715 (COG1925) (\*HTCC2255-Basal)**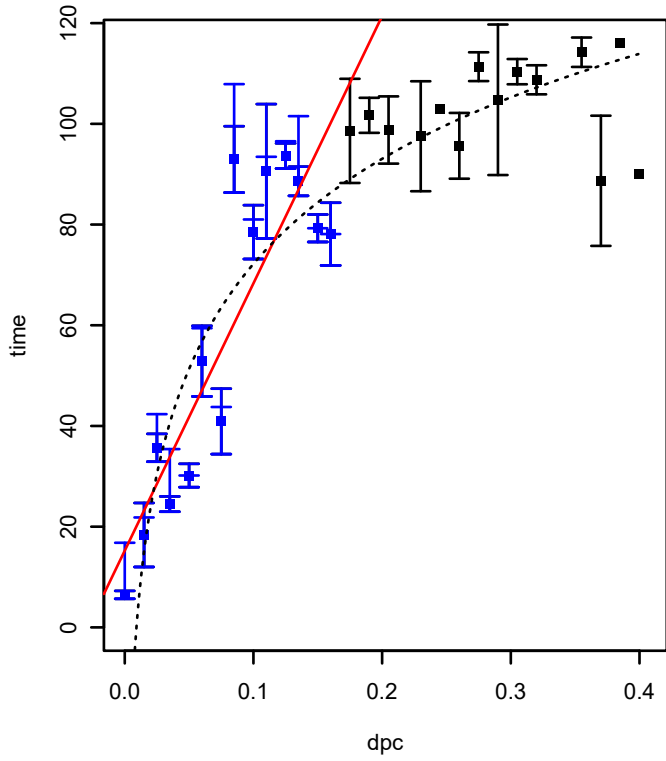**SPO3454 (NA) (\*HTCC2255-Basal)**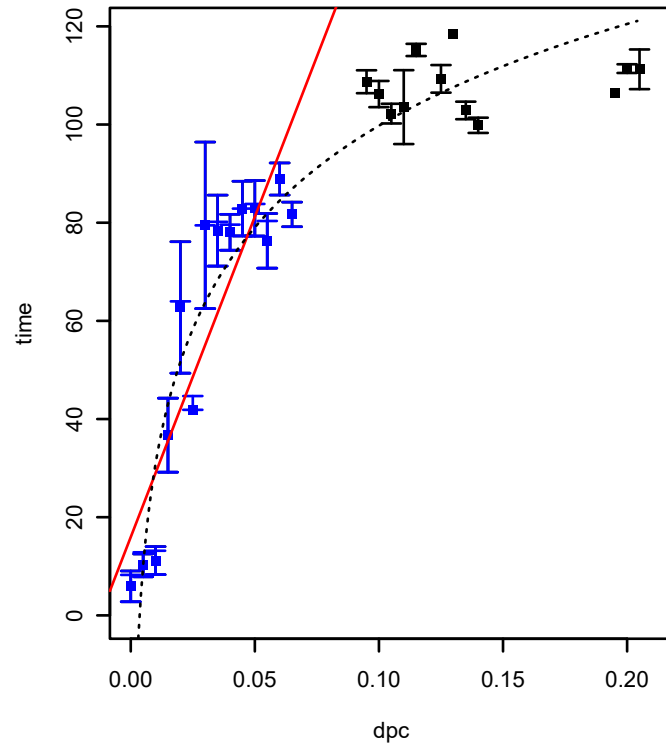**SPO3892 (COG0424) (\*HTCC2255-Basal)**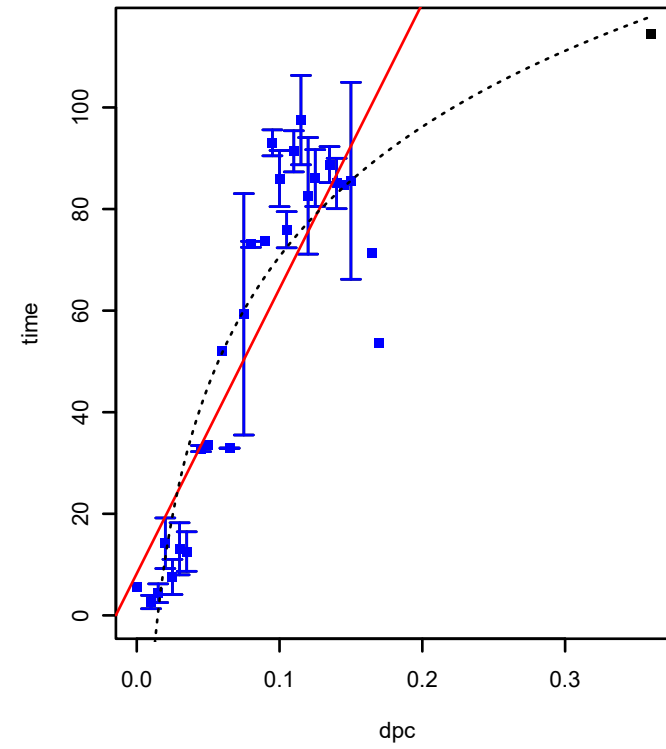**SPO0319 (COG0142)**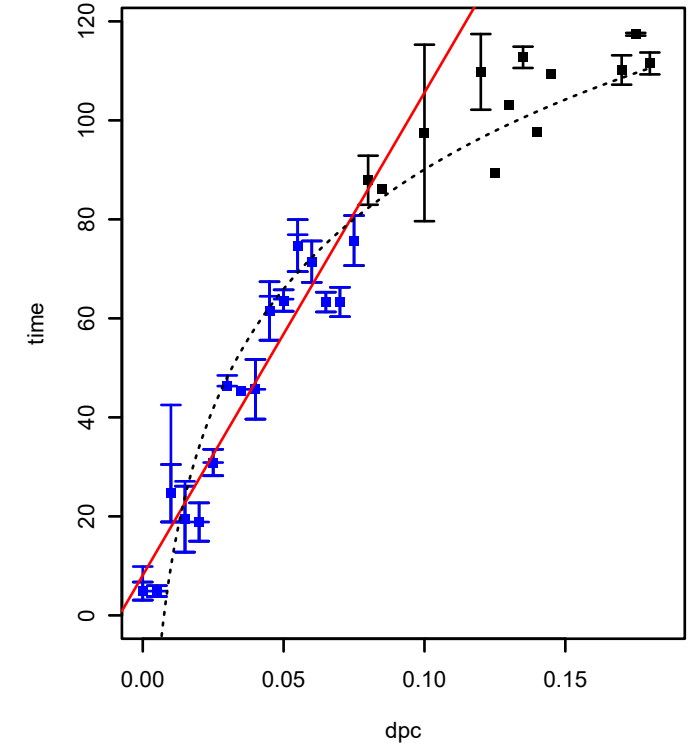**SPO0815 (COG0159)**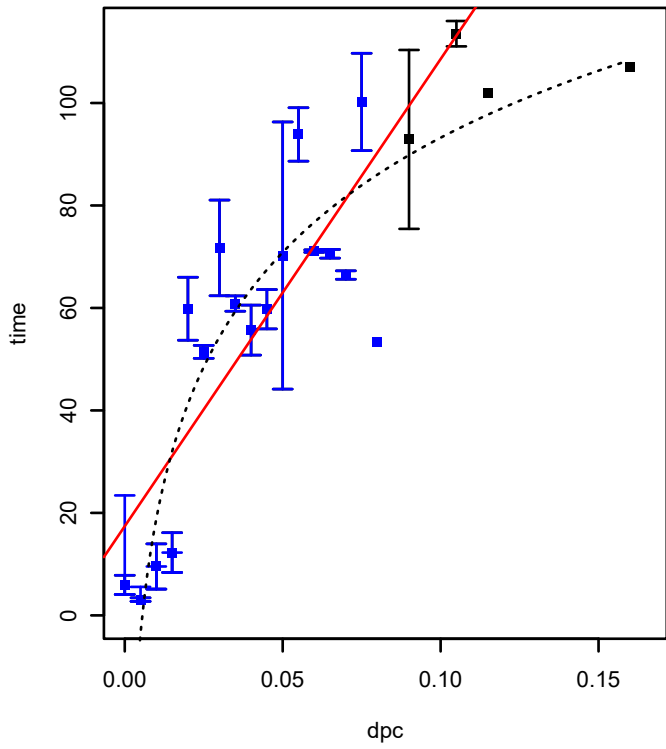**SPO1360 (COG3773) (\*HTCC2255-Basal)**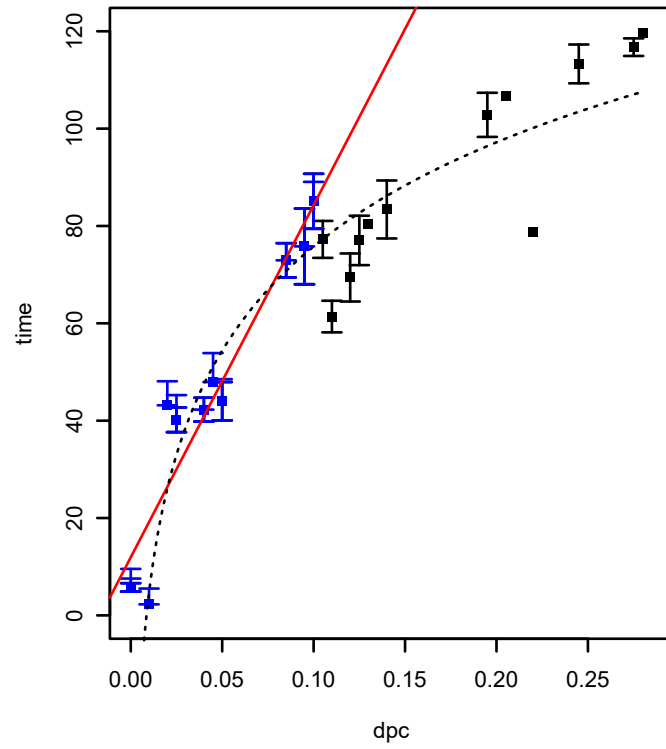**SPO2239 (NA) (\*HTCC2255-Basal)**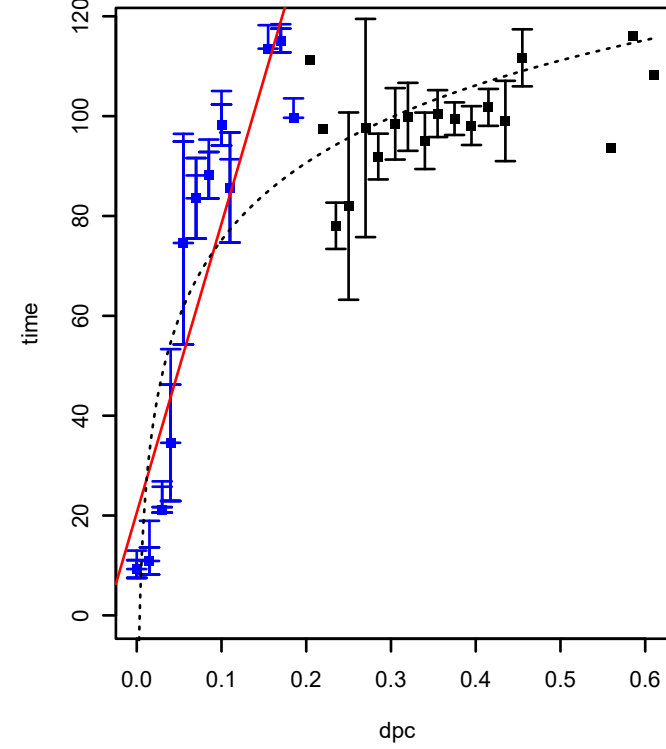**SPO3854 (COG0533) (\*HTCC2255-Basal)**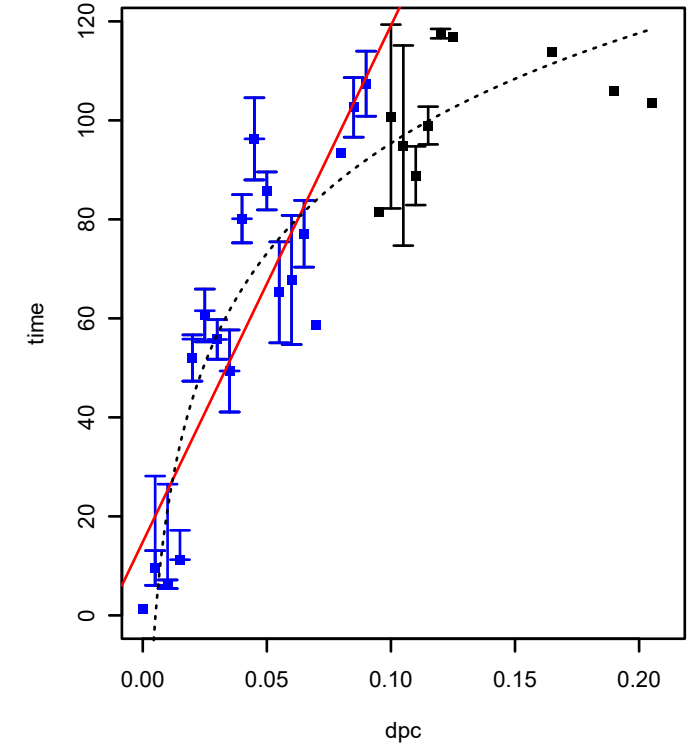

**SPO2752 (NA) (\*HTCC2255-Basal)**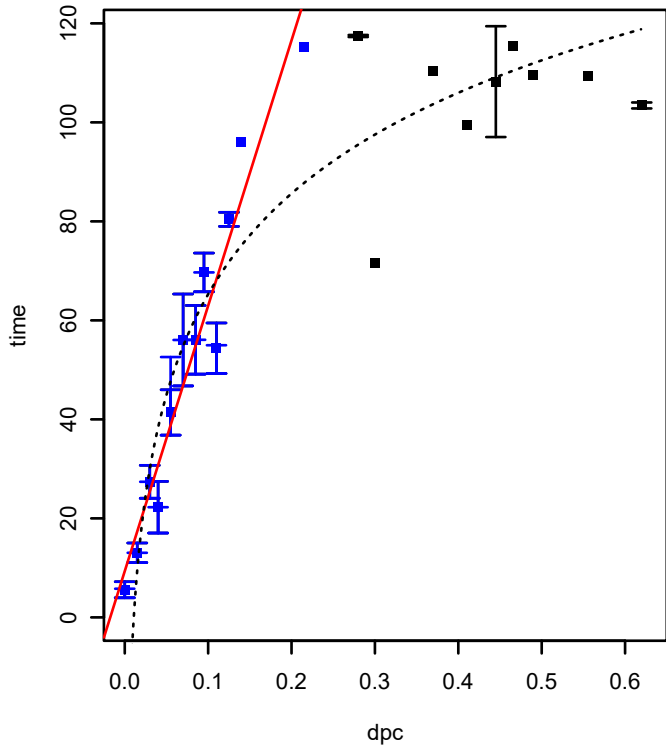**SPO2743 (COG1235) (\*HTCC2255-Basal)**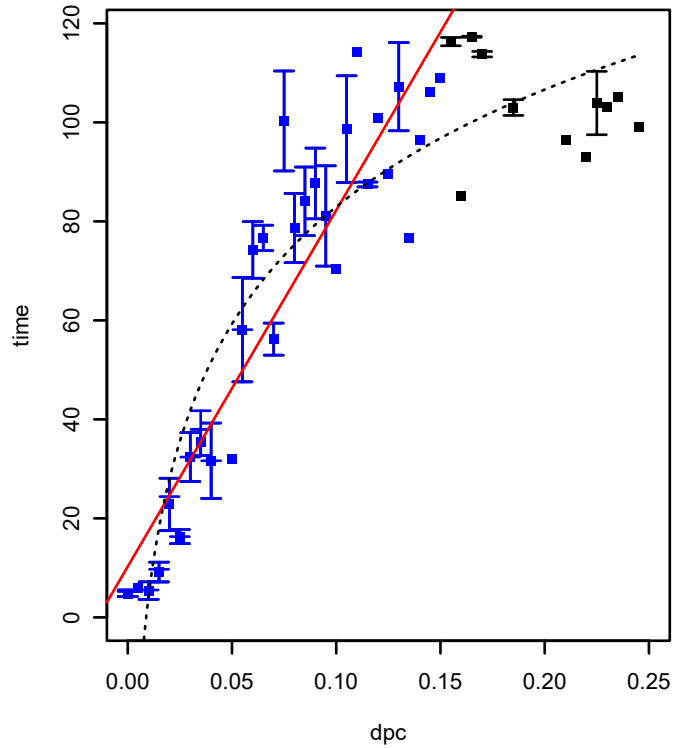**SPO1683 (COG0822) (\*HTCC2255-Basal)**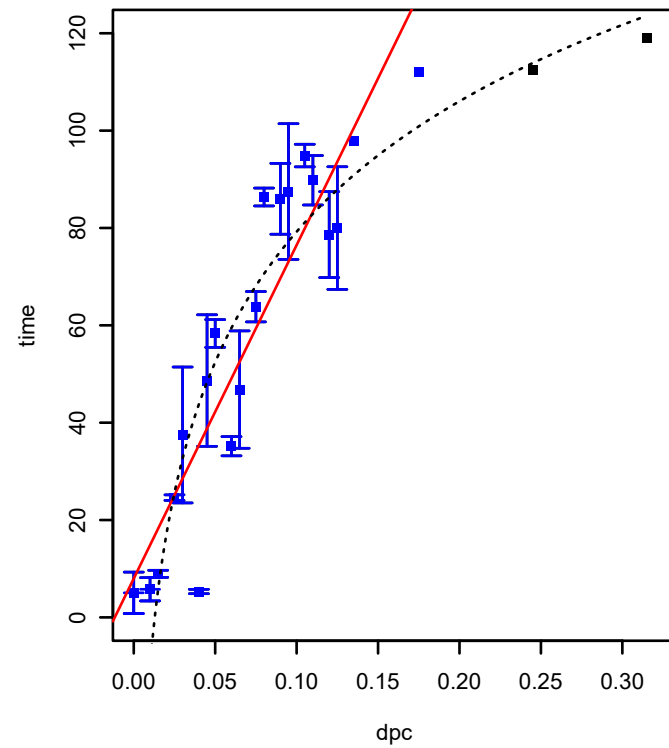**SPOA0008 (COG0319) (\*HTCC2255-Basal)**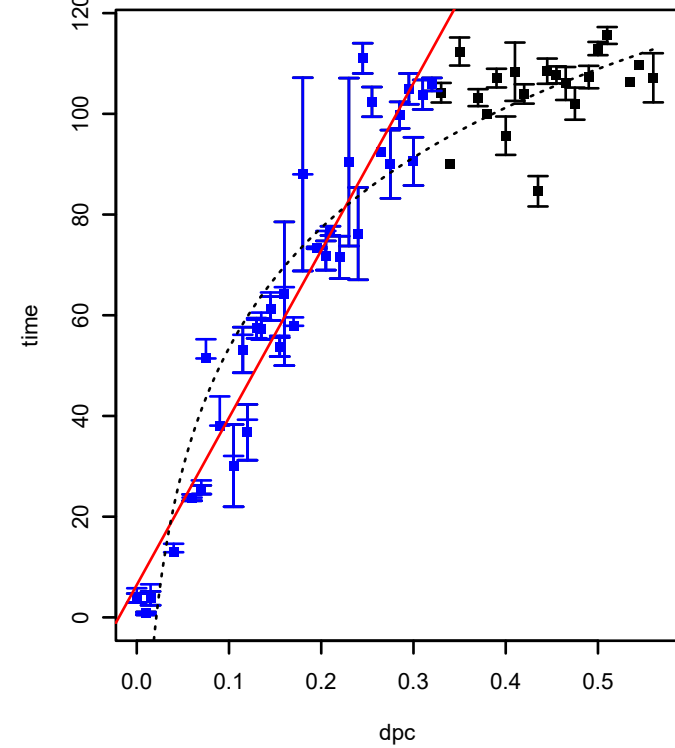**SPO0401 (COG0189) (\*HTCC2255-Basal)**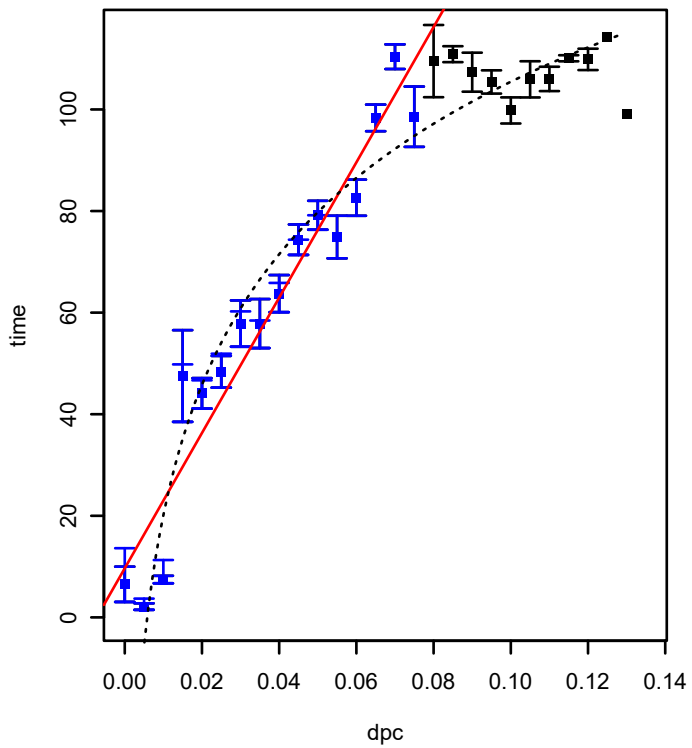**SPO2970 (COG0721) (\*HTCC2255-Basal)**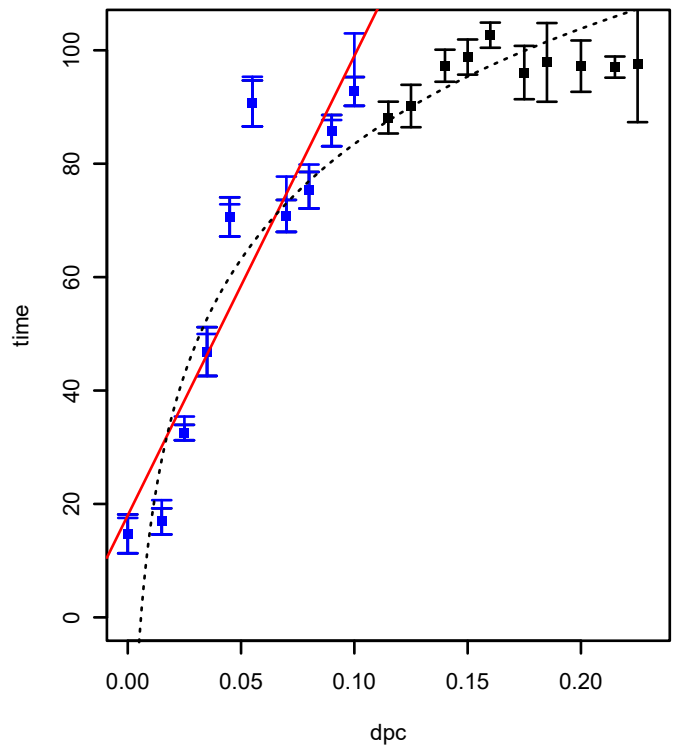**SPO3866 (COG1999)**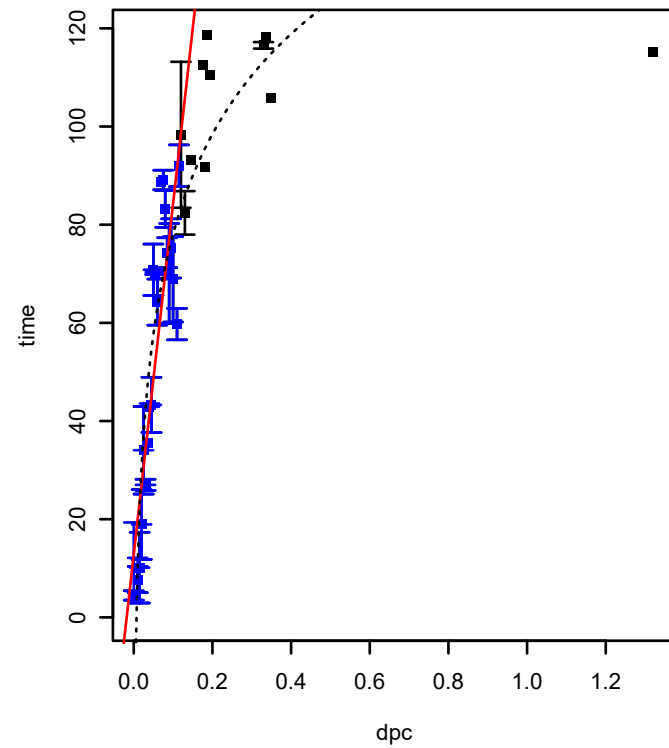**SPO2169 (COG0150) (\*HTCC2255-Basal)**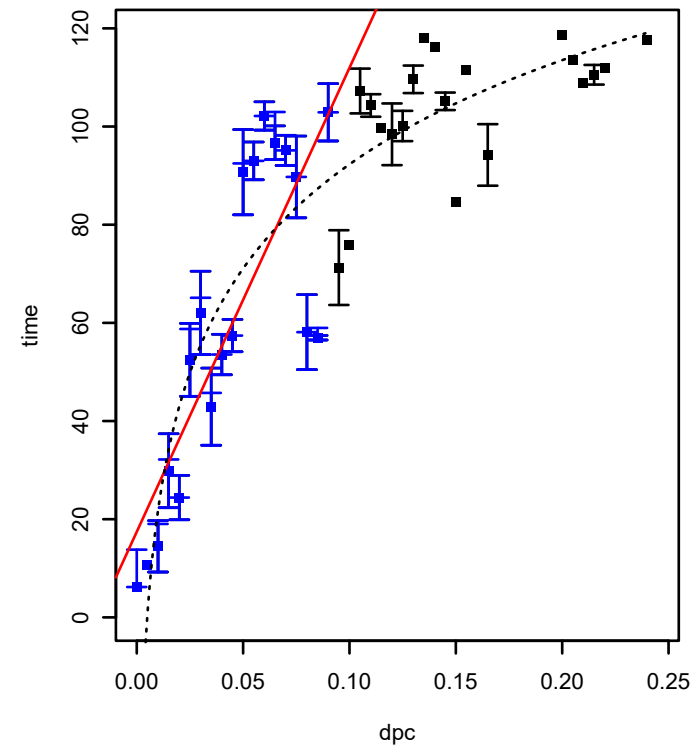

**SPO3890 (COG0237)**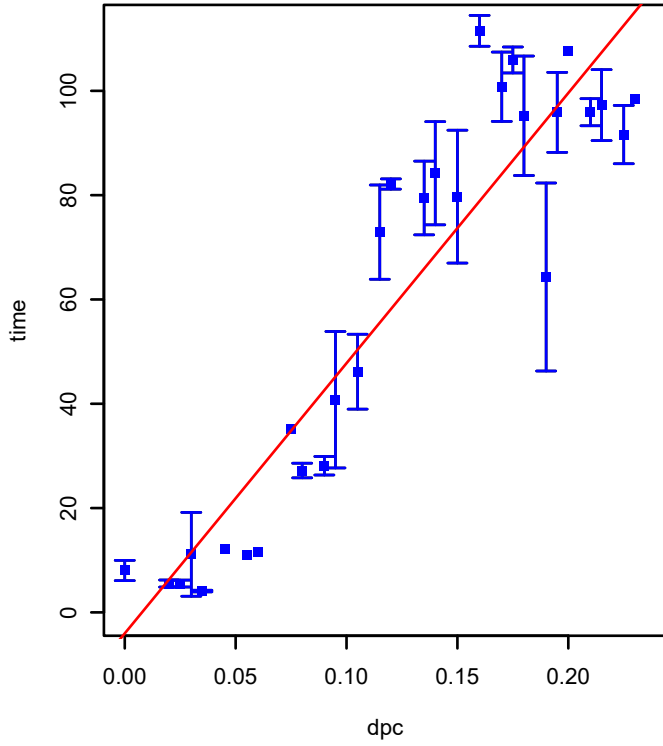**SPO3629 (COG1385) (\*HTCC2255-Basal)**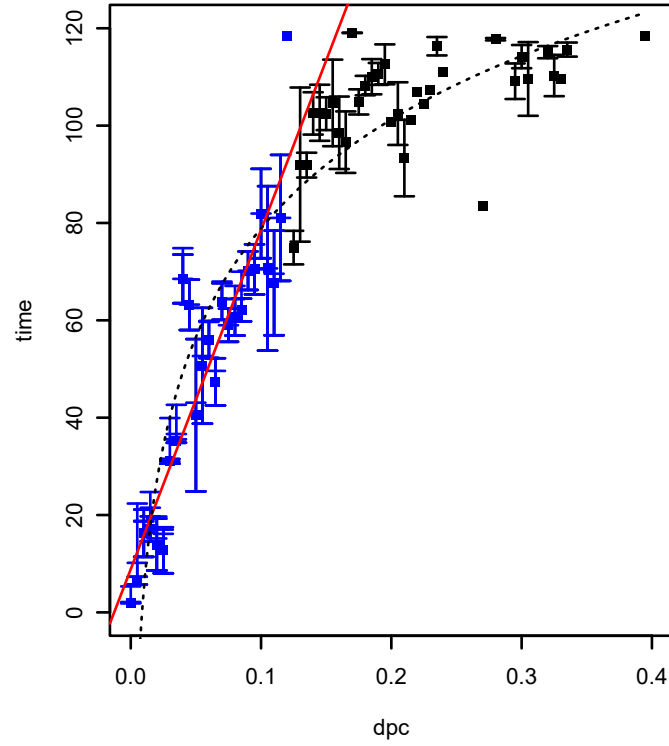**SPO3418 (COG0154)**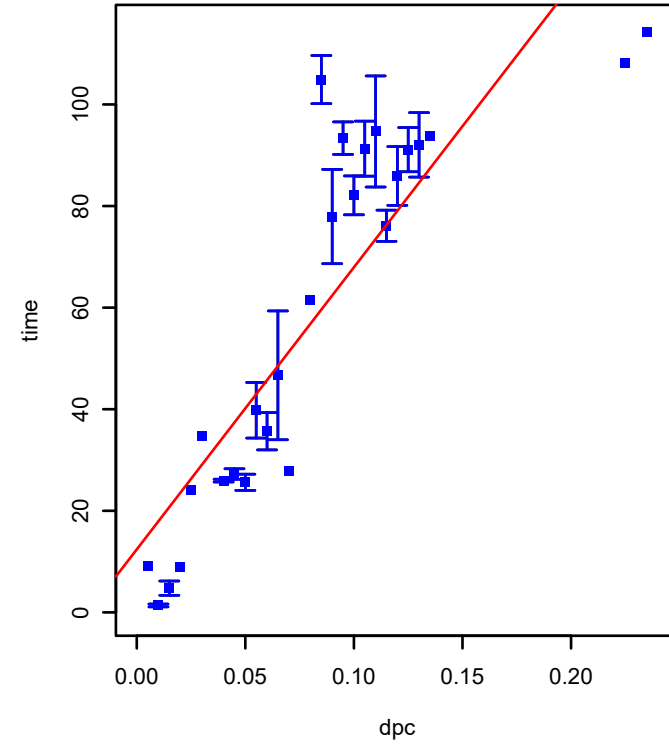**SPO2113 (NA) (\*HTCC2255-Basal)**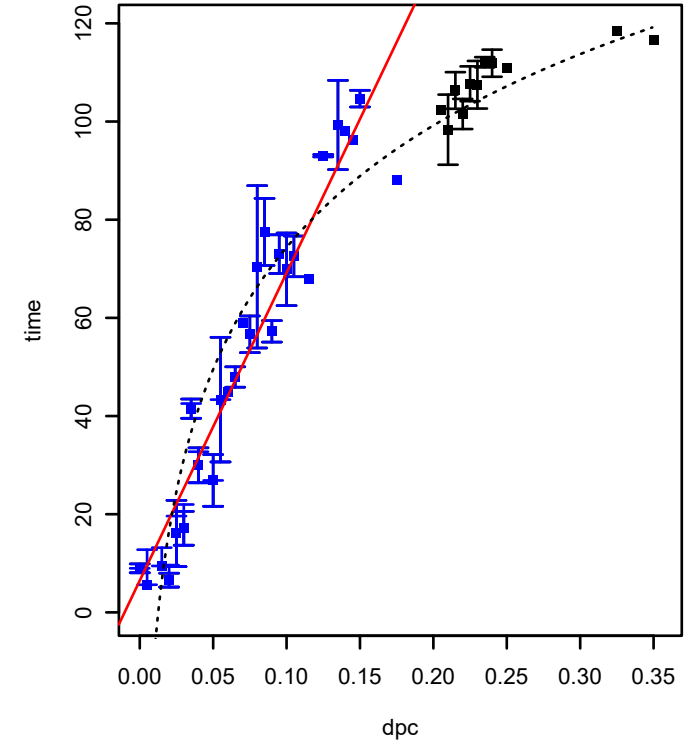**SPO1009 (COG2360) (\*HTCC2255-Basal)**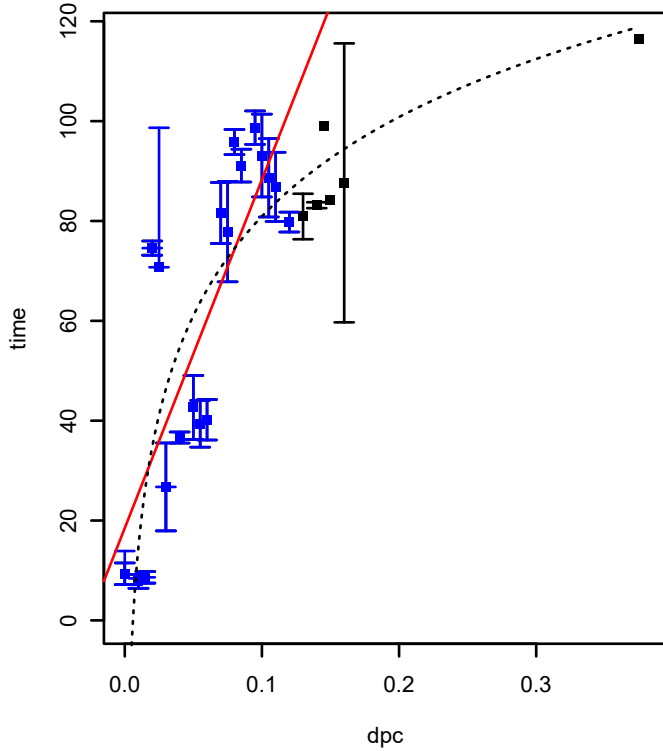**SPO3482 (COG3591) (\*HTCC2255-Basal)**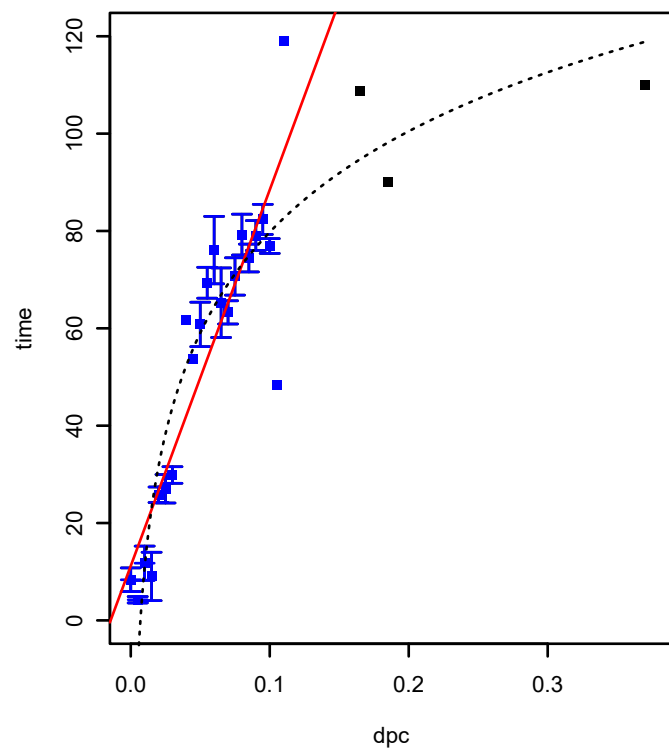**SPO3871 (COG1208)**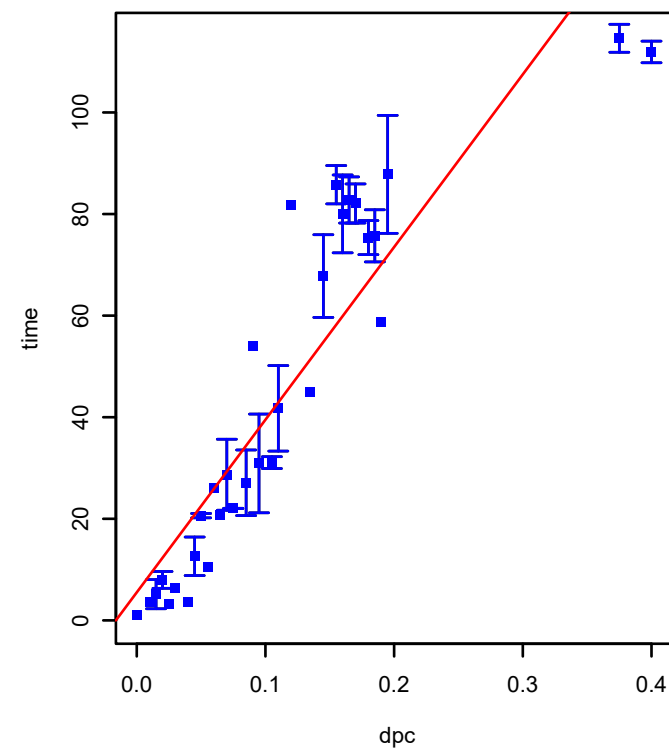**SPO2350 (COG0816) (\*HTCC2255-Basal)**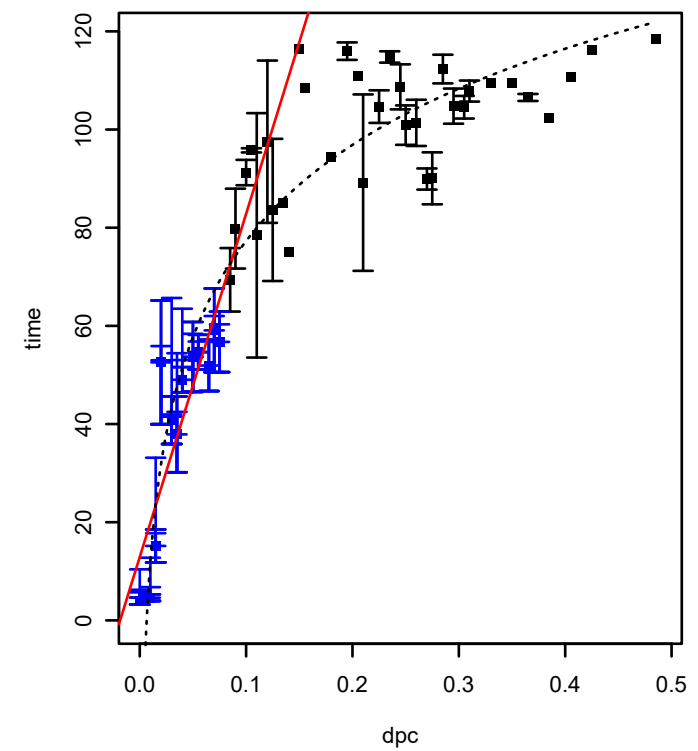

**SPO3392 (COG0564) (\*HTCC2255-Basal)**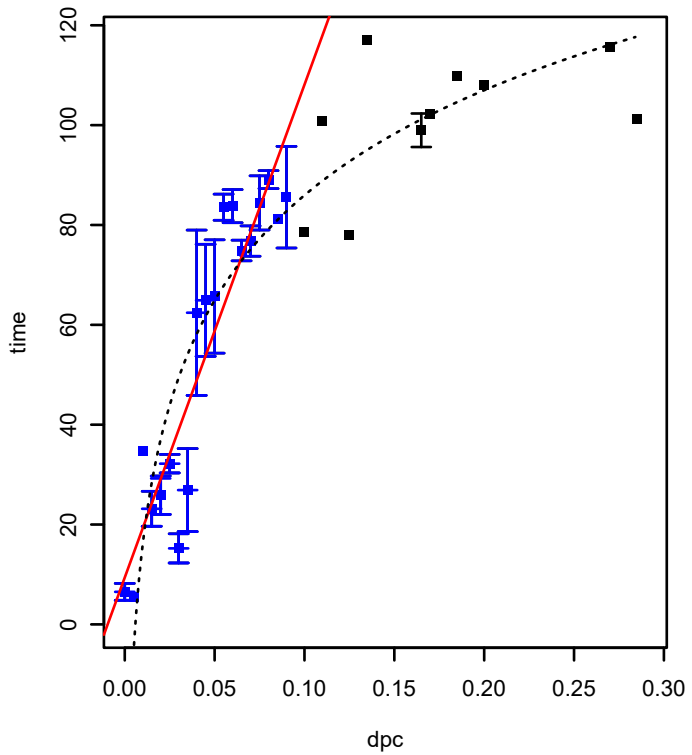**SPO3423 (COG3118) (\*HTCC2255-Basal)**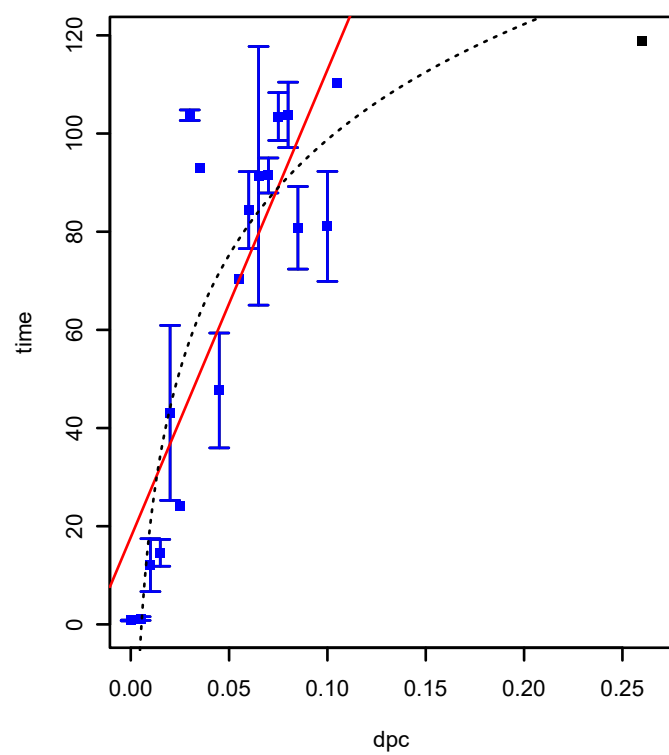**SPO0505 (COG0200)**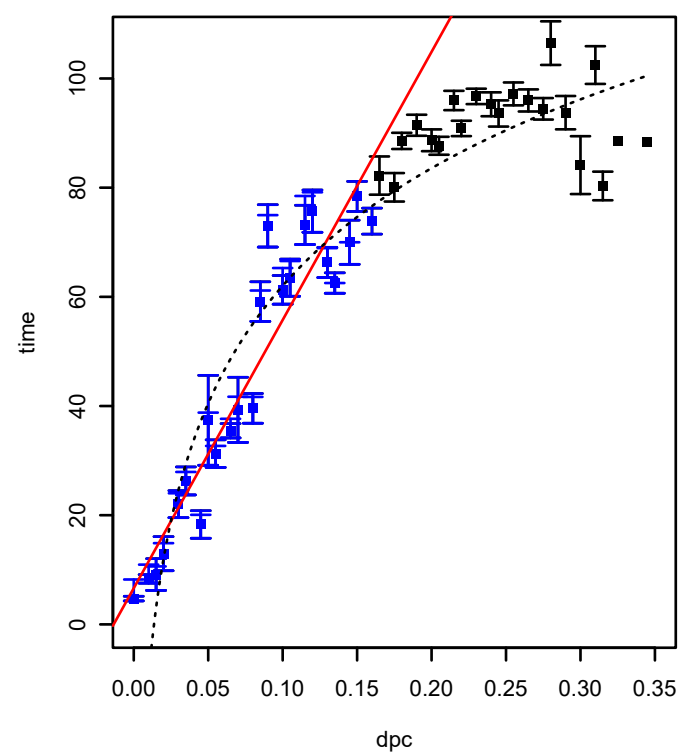**SPO1201 (COG1181) (\*HTCC2255-Basal)**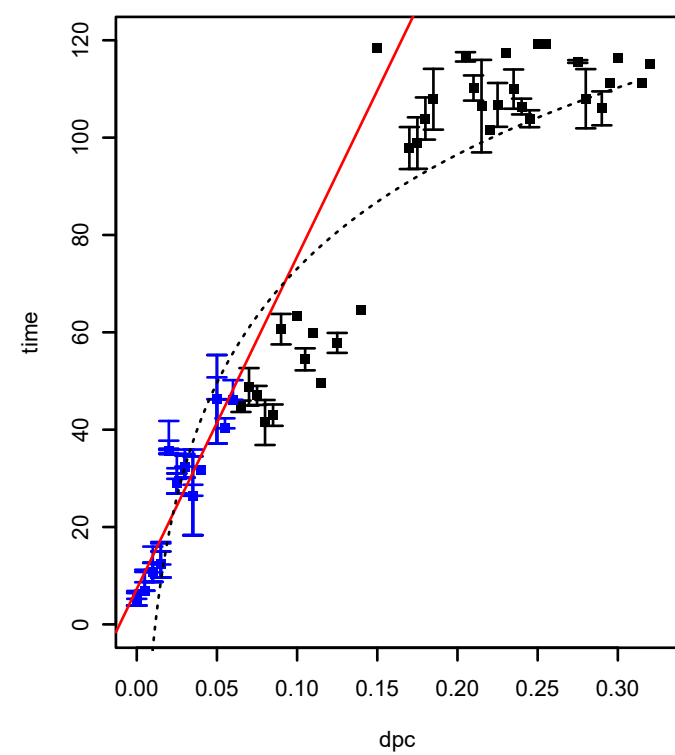**SPO1336 (COG2917)**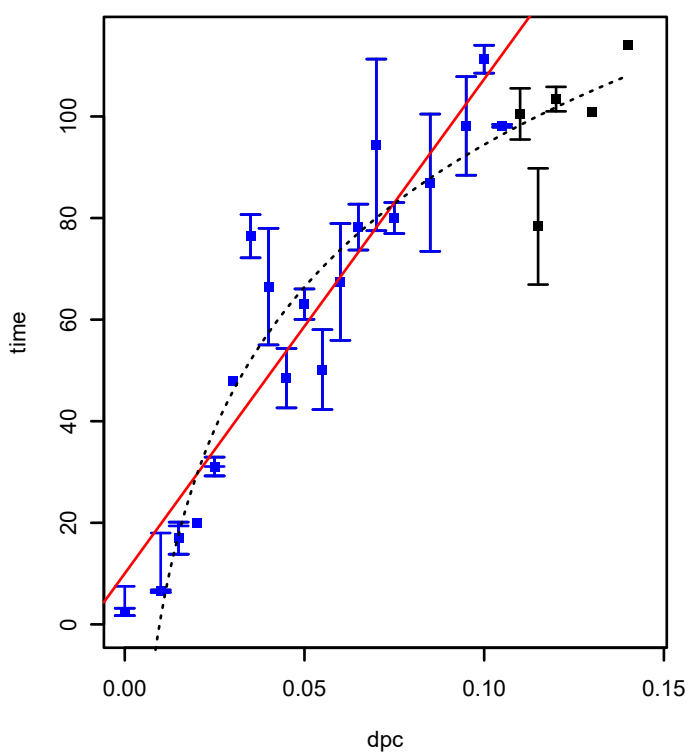**SPO1305 (COG4215)**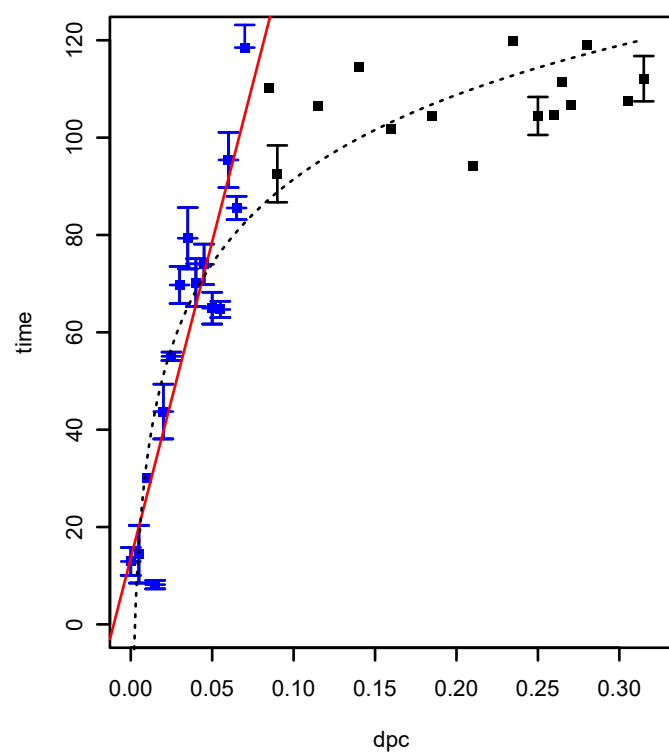**SPO0532 (COG0706) (\*HTCC2255-Basal)**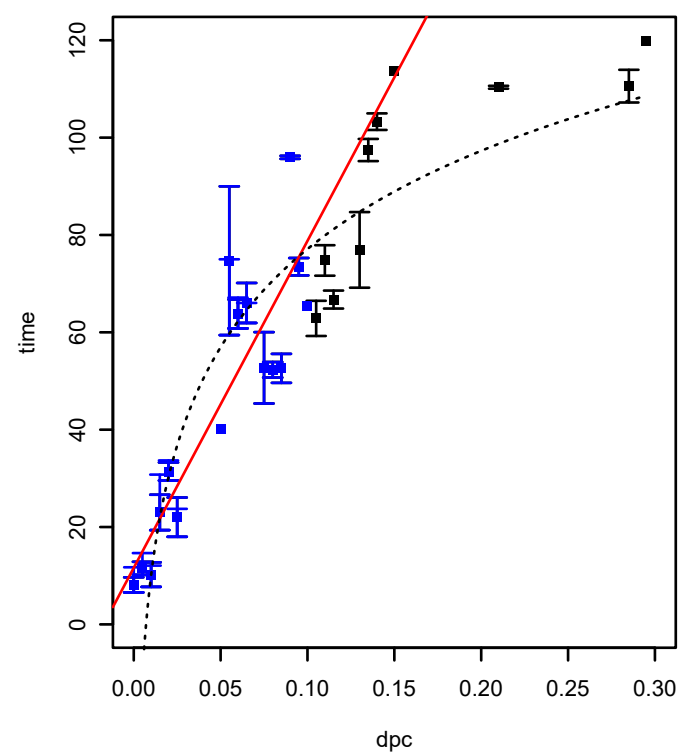**SPO1374 (COG1011) (\*HTCC2255-Basal)**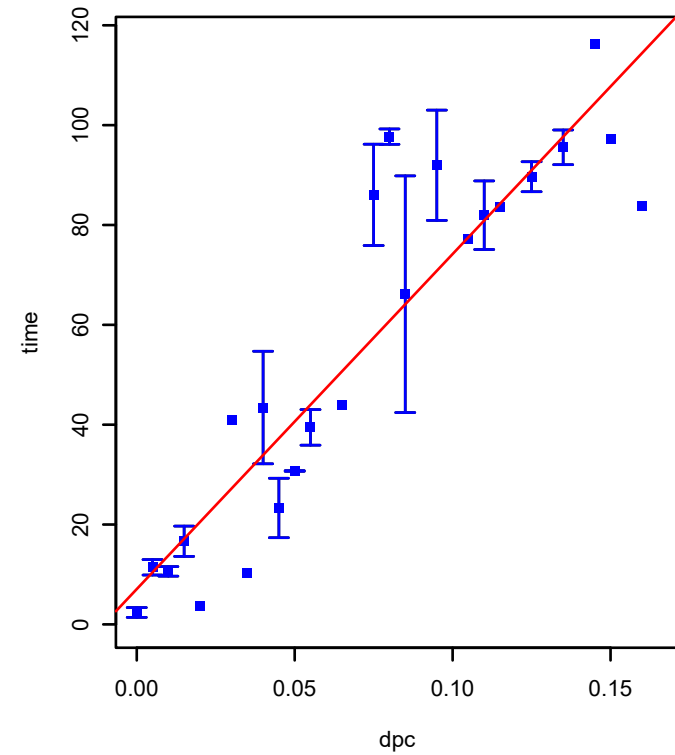

**SPO1276 (COG1393) (\*HTCC2255-Basal)**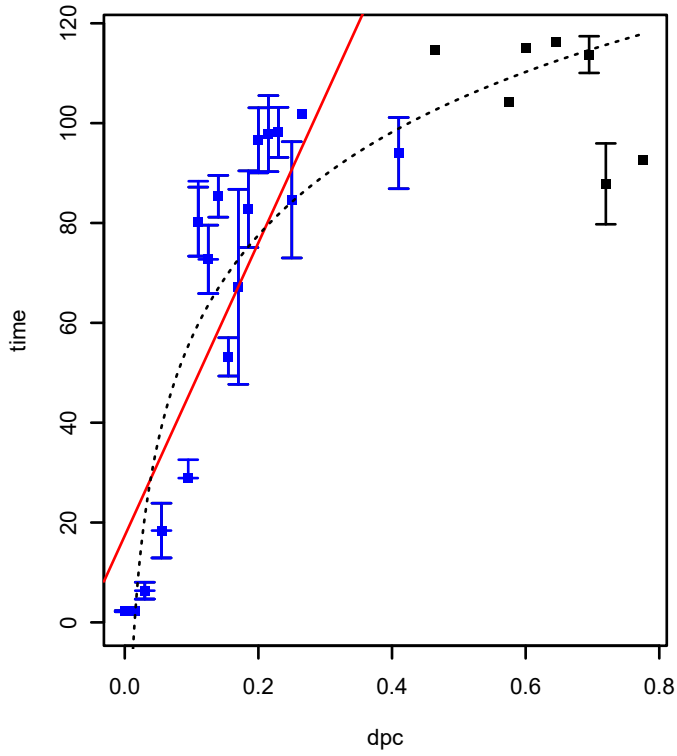**SPO0062 (COG2740) (\*HTCC2255-Basal)**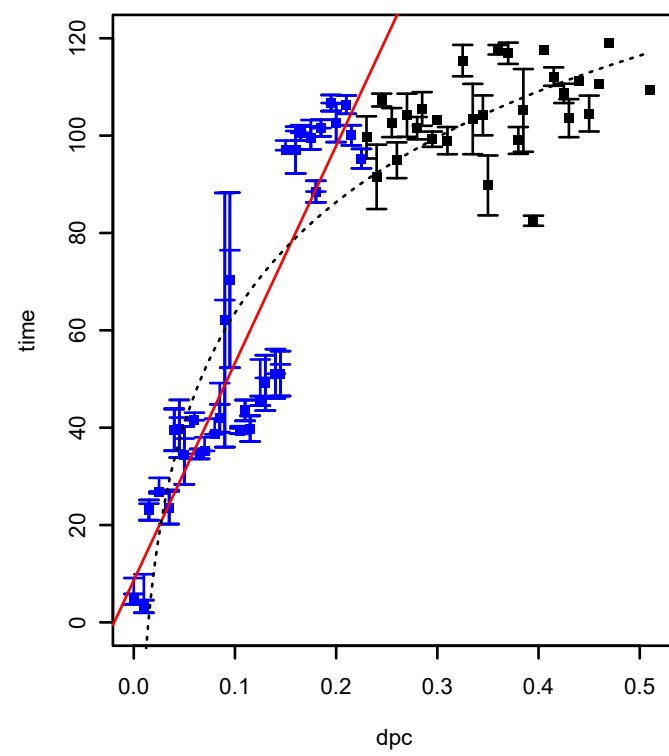**SPO3837 (COG0130)**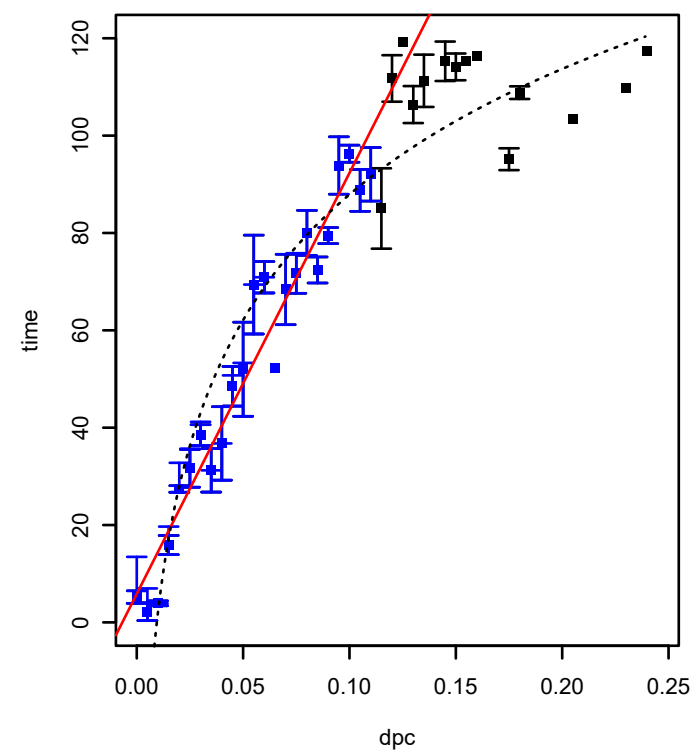**SPO2128 (NA) (\*HTCC2255-Basal)**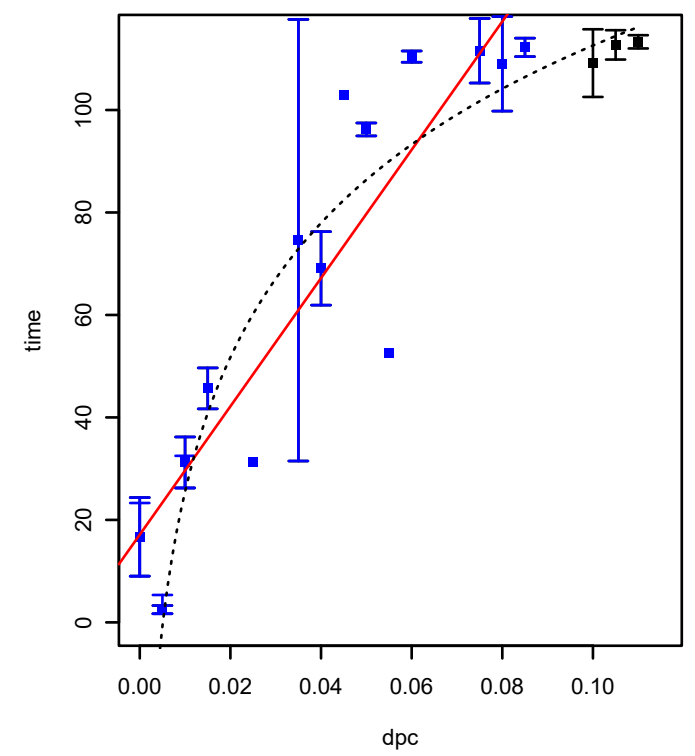**SPO2786 (COG0838) (\*HTCC2255-Basal)**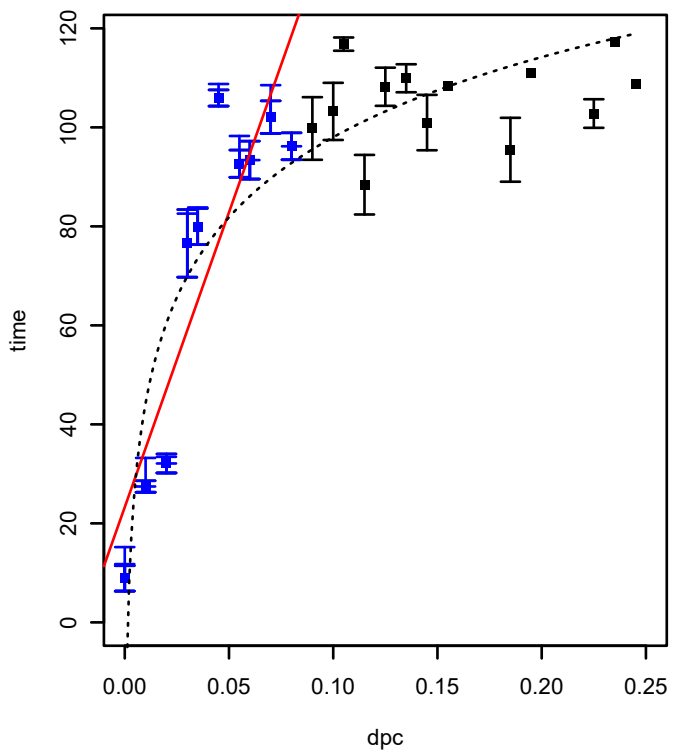**SPO0340 (COG1249) (\*HTCC2255-Basal)**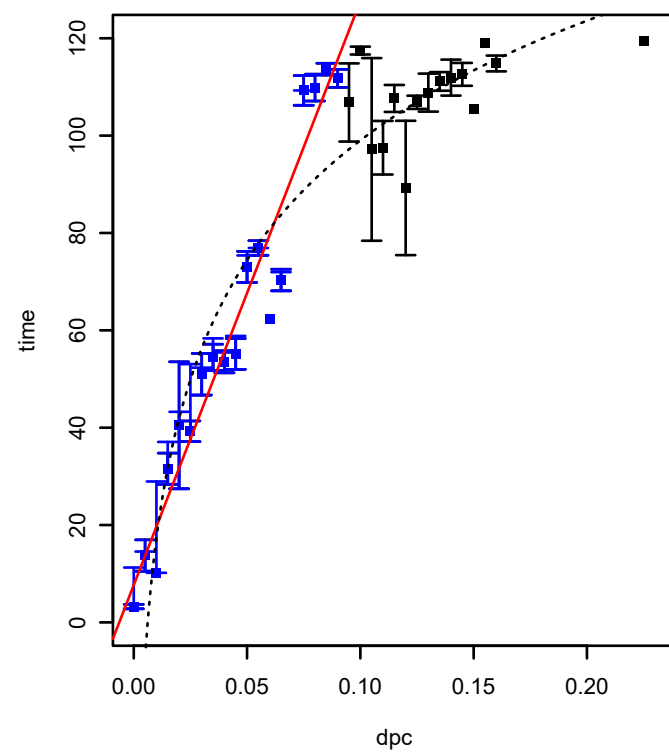**SPO1150 (COG0566)**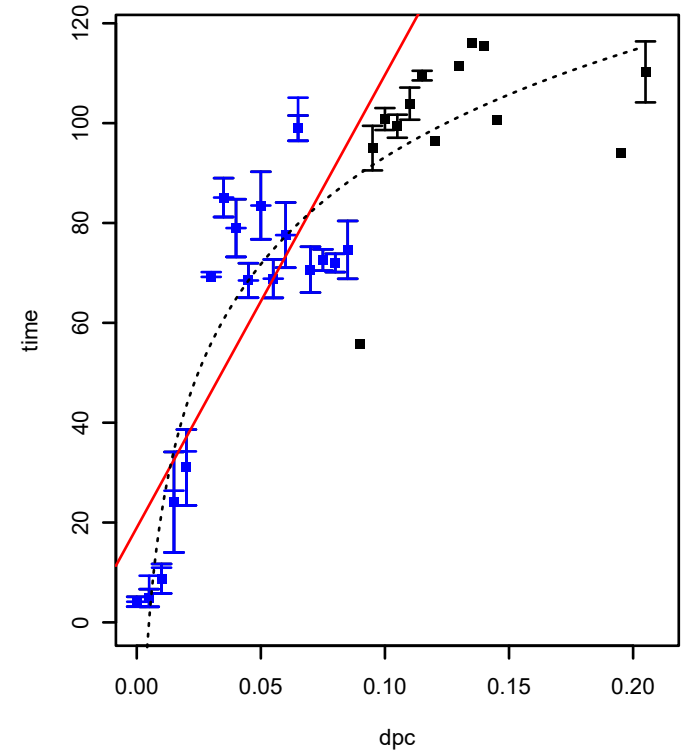**SPO0146 (COG0266) (\*HTCC2255-Basal)**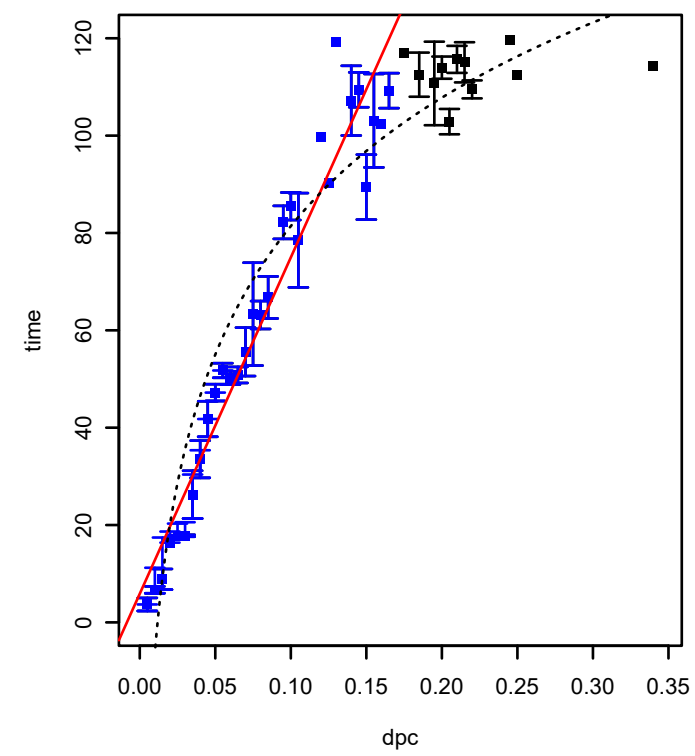



**SPO3336 (NA)**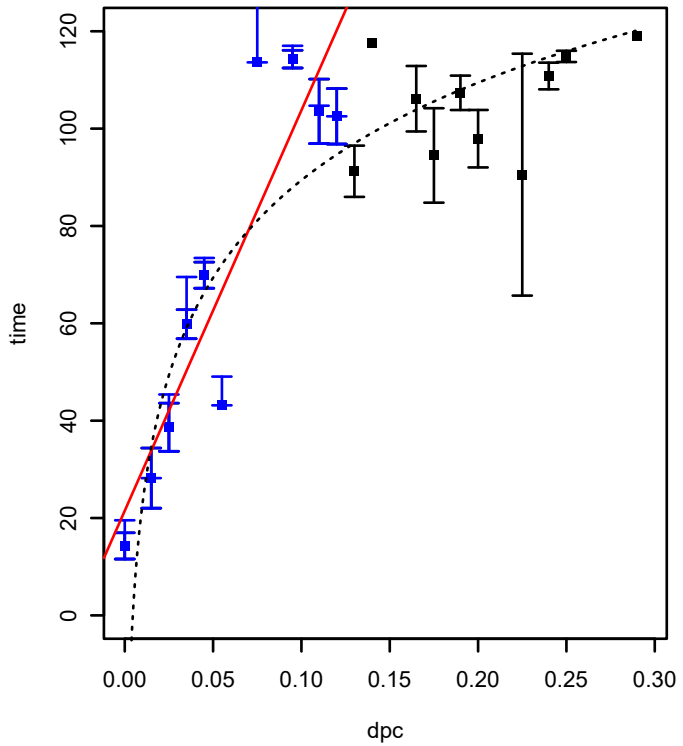**SPO3177 (COG0079)**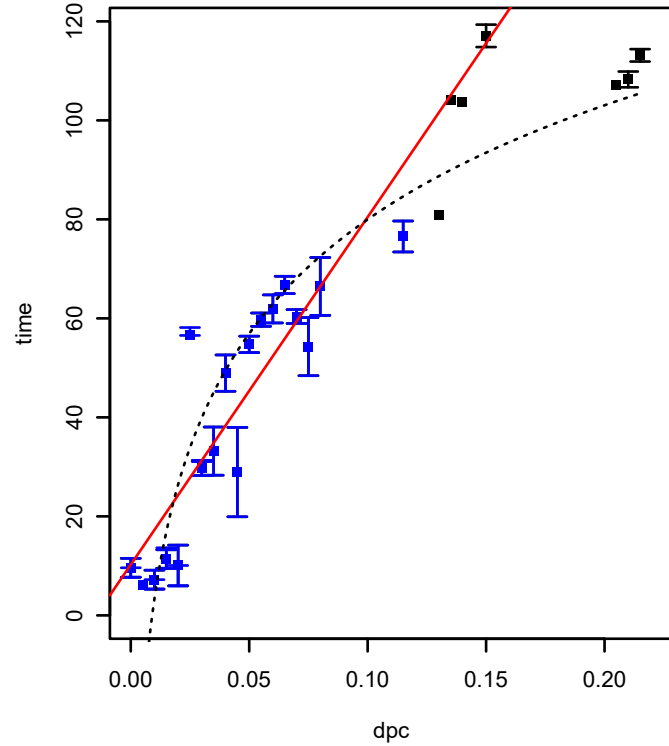**SPO0059 (COG1364) (\*HTCC2255-Basal)**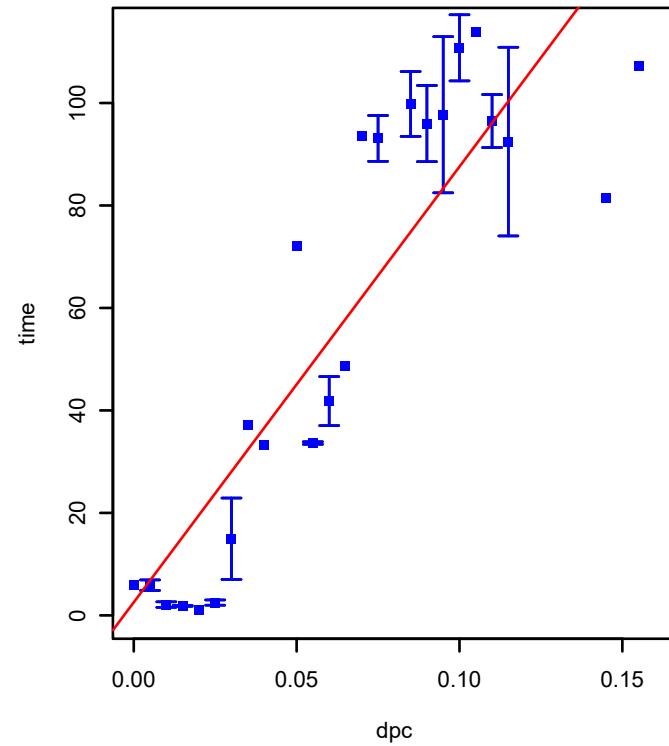**SPO2054 (COG1612) (\*HTCC2255-Basal)**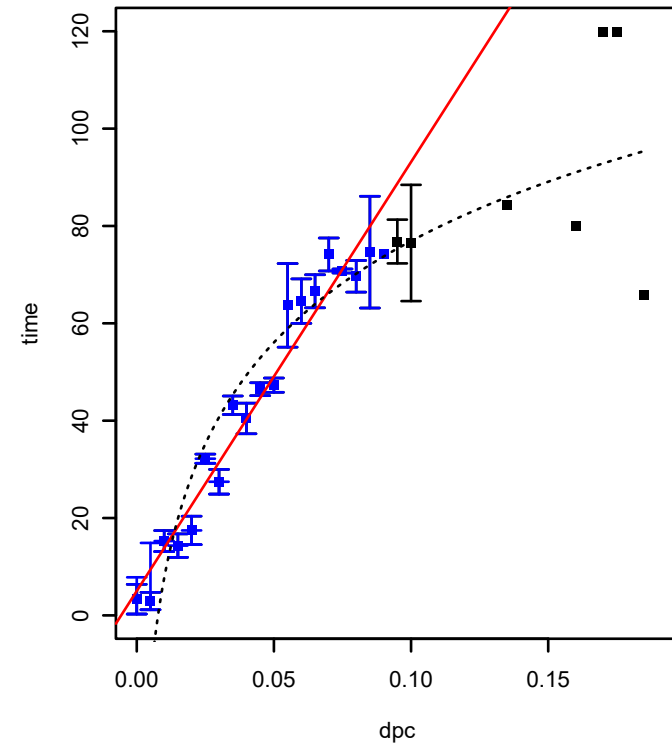**SPO0498 (COG0199)**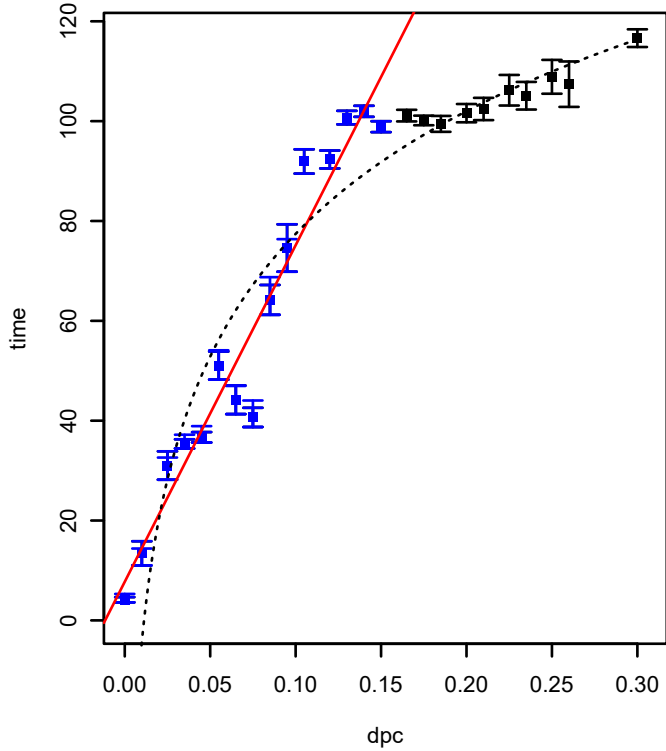**SPO2226 (COG0809) (\*HTCC2255-Basal)**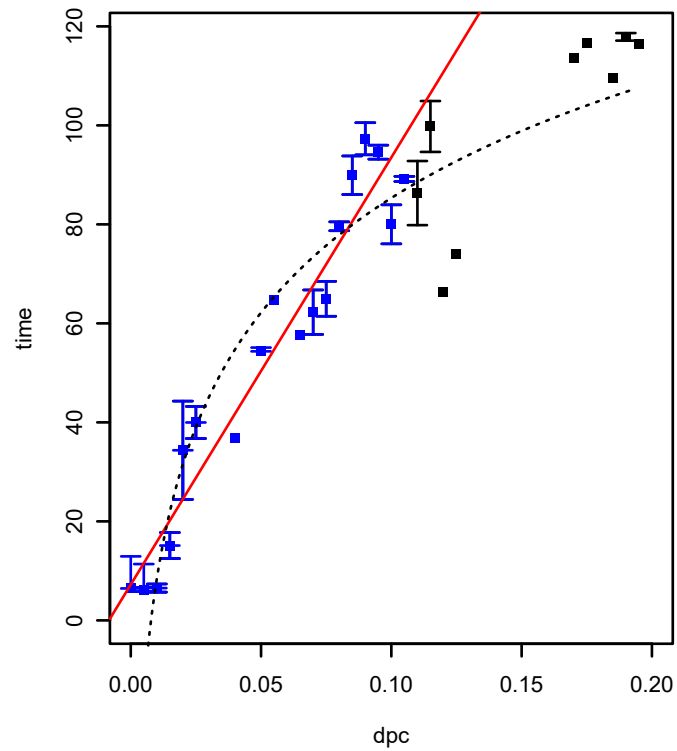**SPO2761 (COG1521) (\*HTCC2255-Basal)**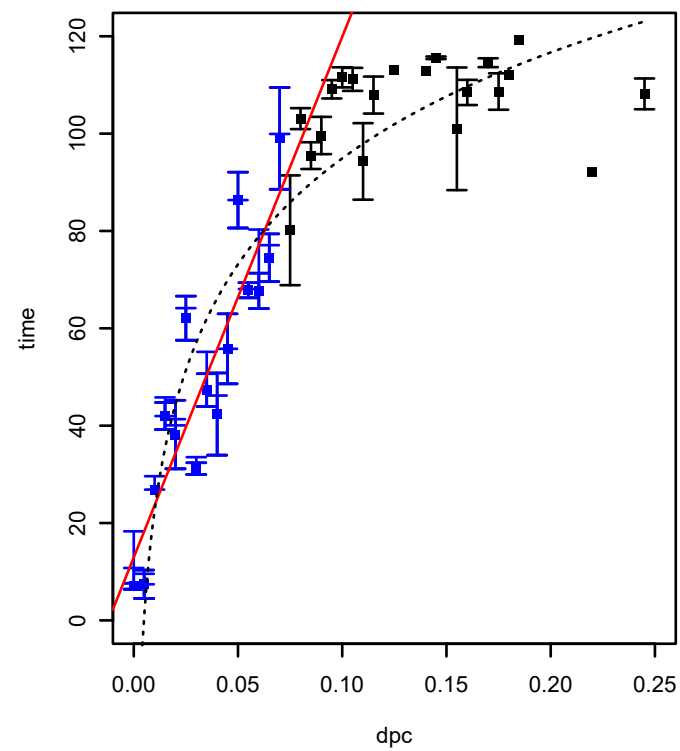**SPO1868 (COG0278) (\*HTCC2255-Basal)**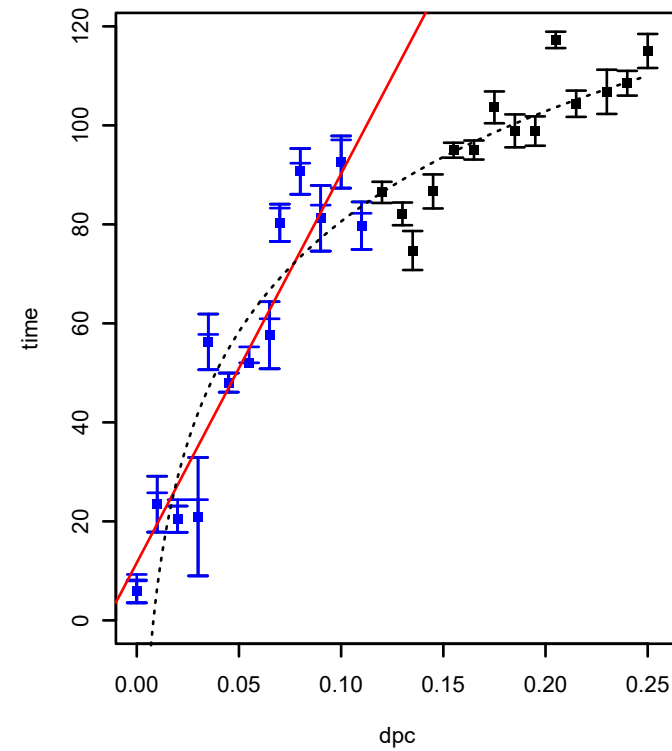

**SPO1670 (COG4775)**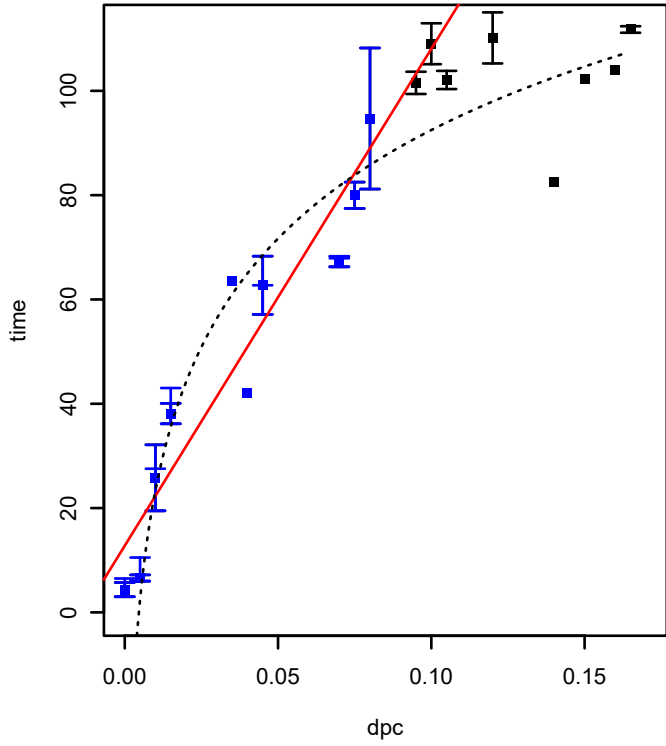**SPO0944 (COG0621) (\*HTCC2255-Basal)**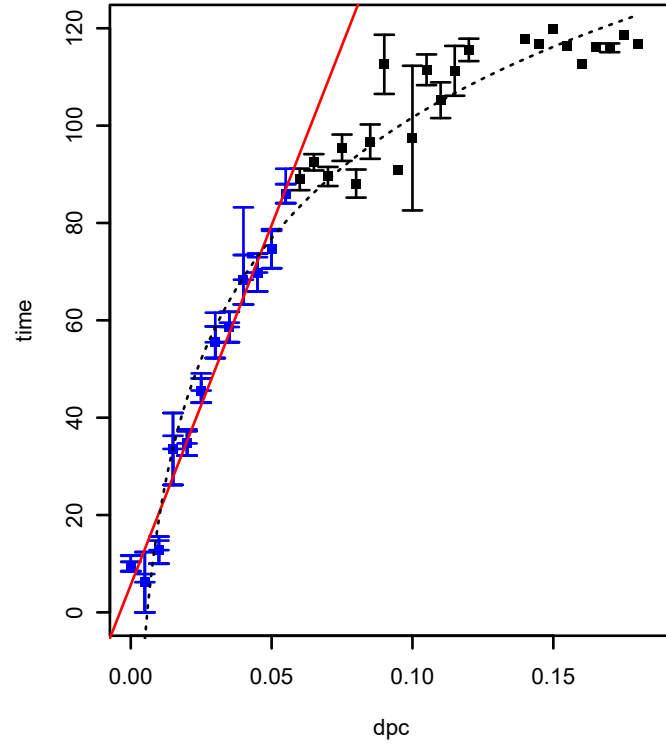**SPO2109 (COG0519)**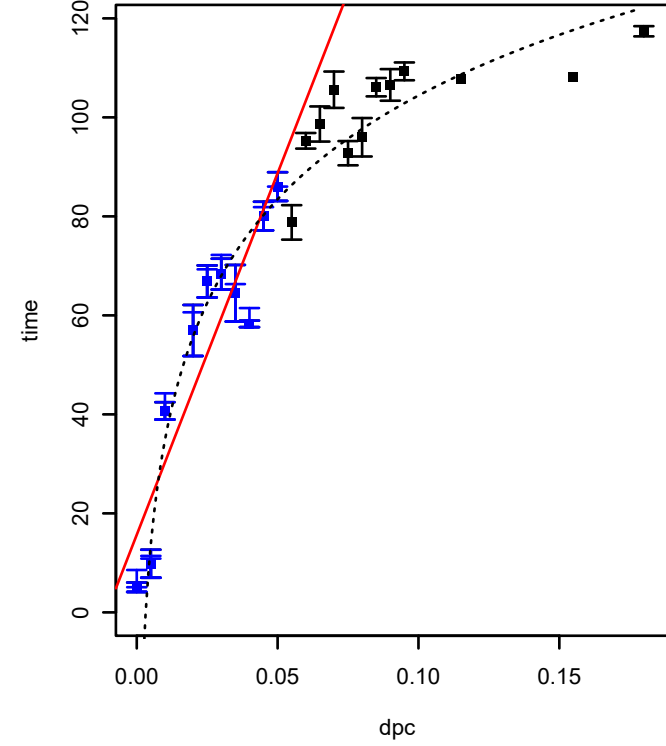**SPO1686 (COG1206) (\*HTCC2255-Basal)**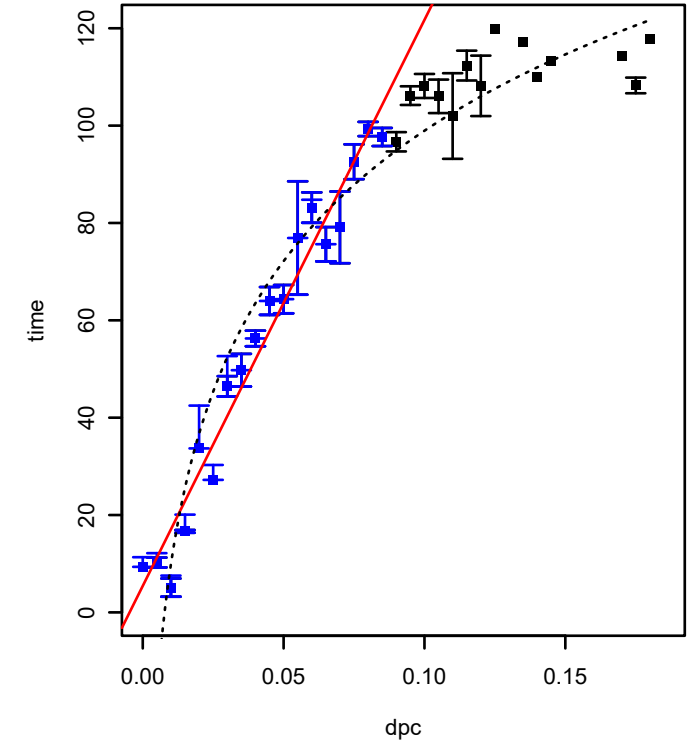**SPO0063 (COG0195) (\*HTCC2255-Basal)**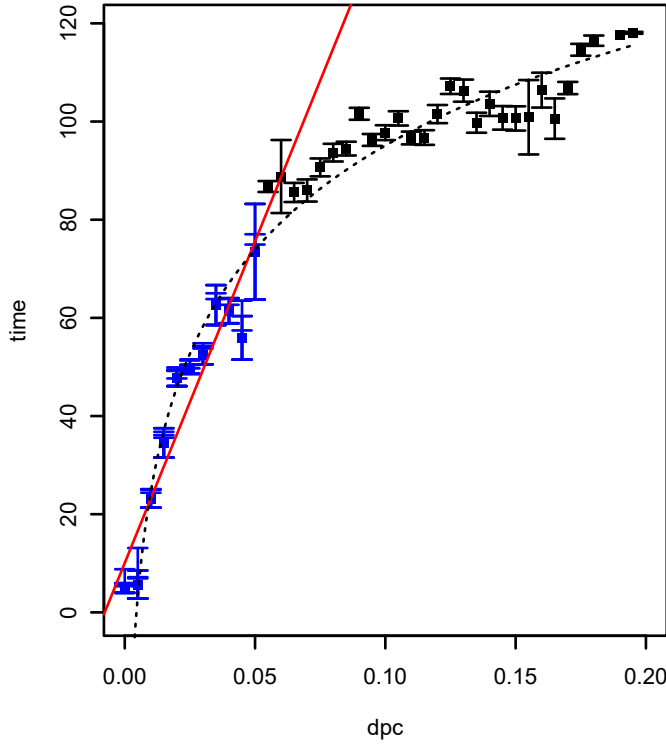**SPO0811 (COG0193) (\*HTCC2255-Basal)**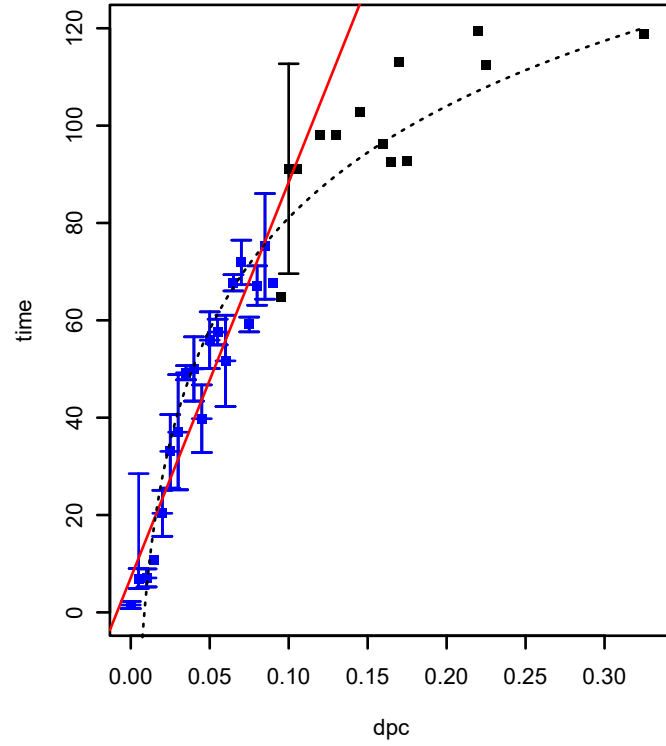**SPO2145 (COG0760)**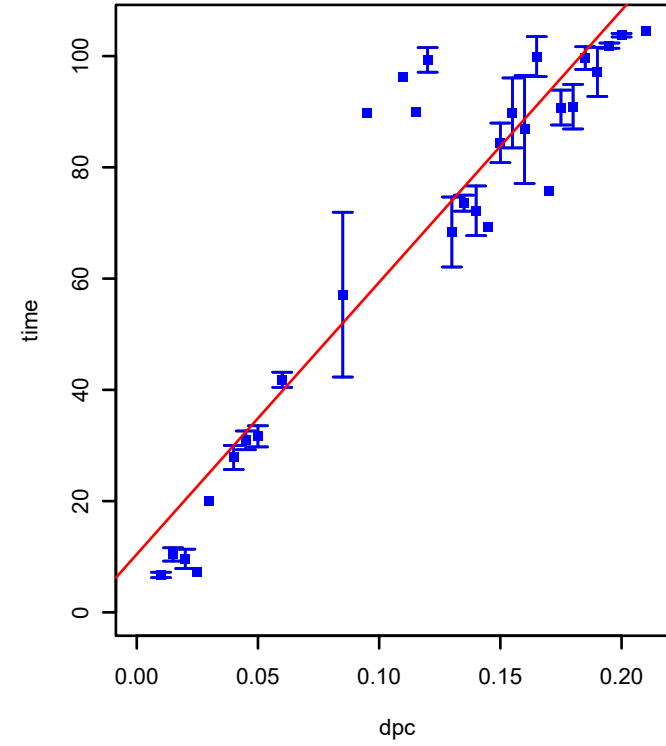**SPO3201 (COG0854)**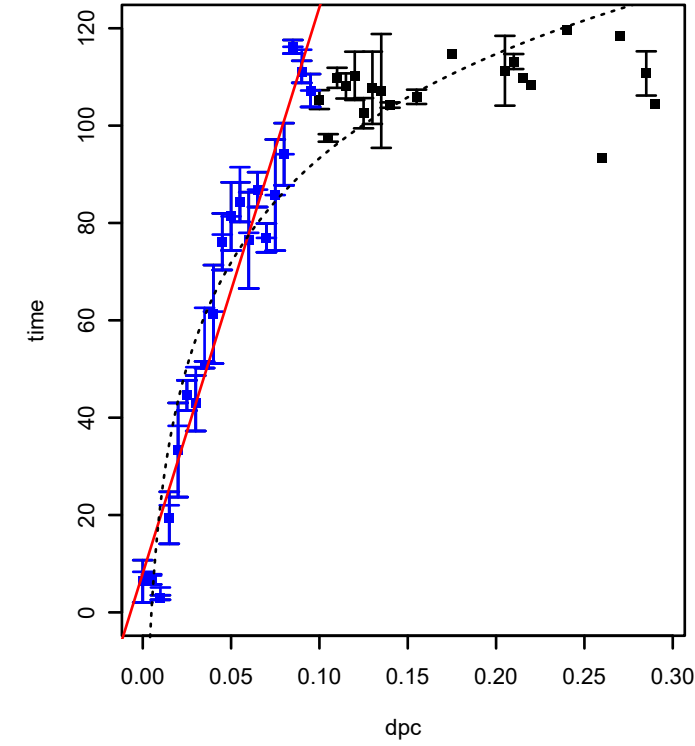

**SPO1264 (COG0436)**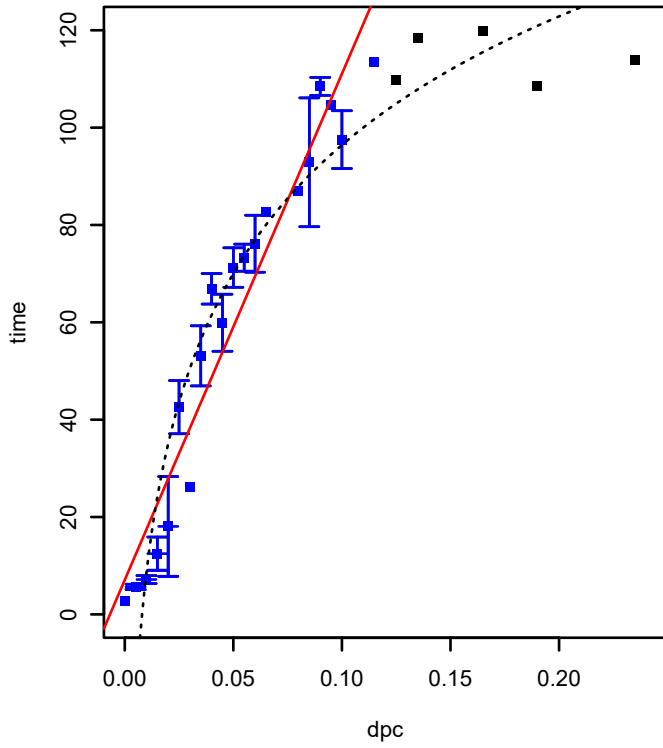**SPO0802 (COG0539) (\*HTCC2255-Basal)**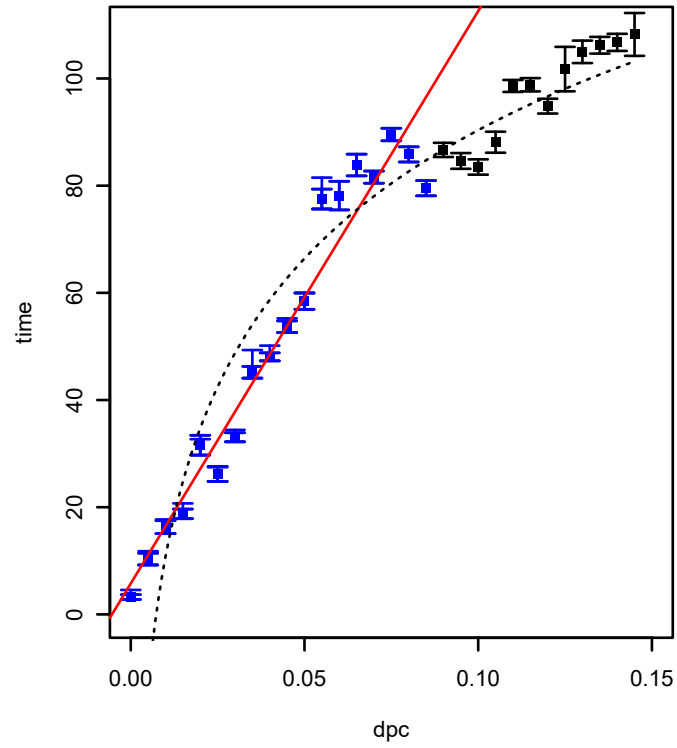**SPO2837 (COG2071) (\*HTCC2255-Basal)**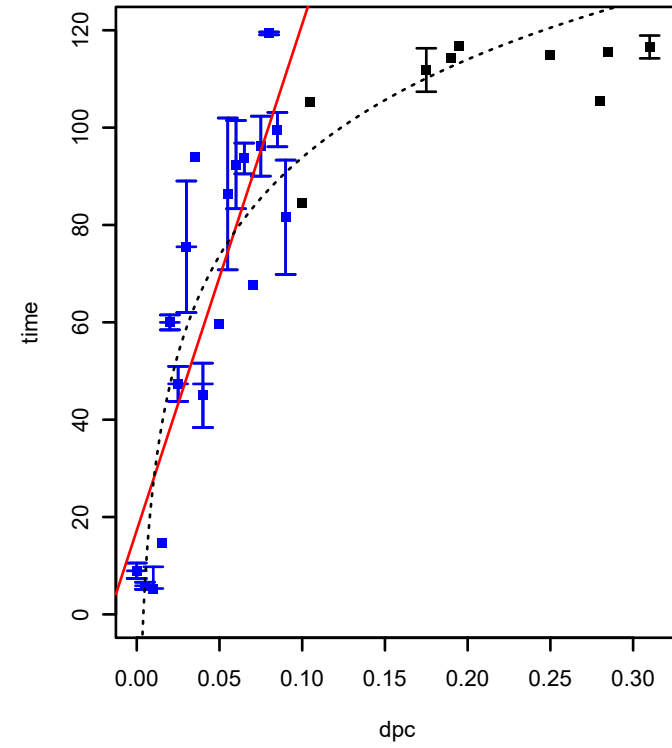**SPO2318 (COG3737)**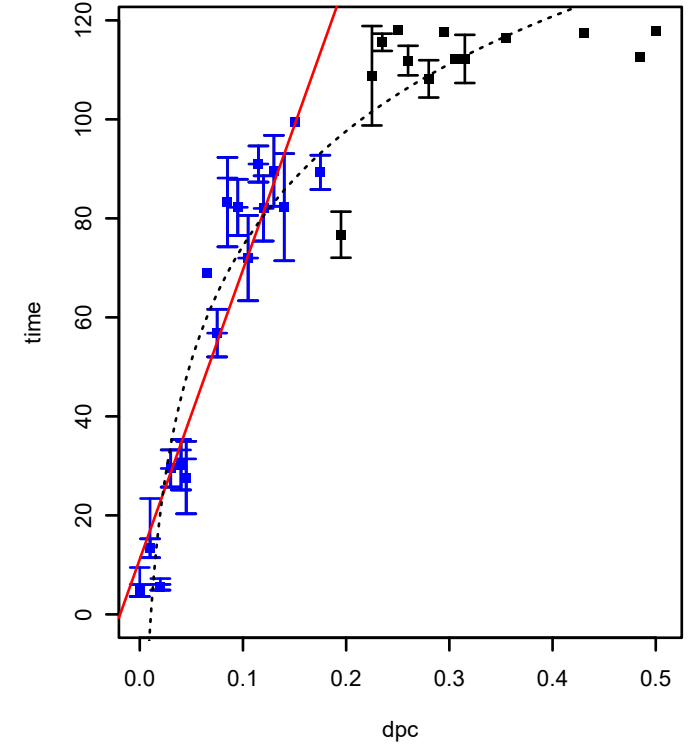**SPO0714 (COG2893) (\*HTCC2255-Basal)**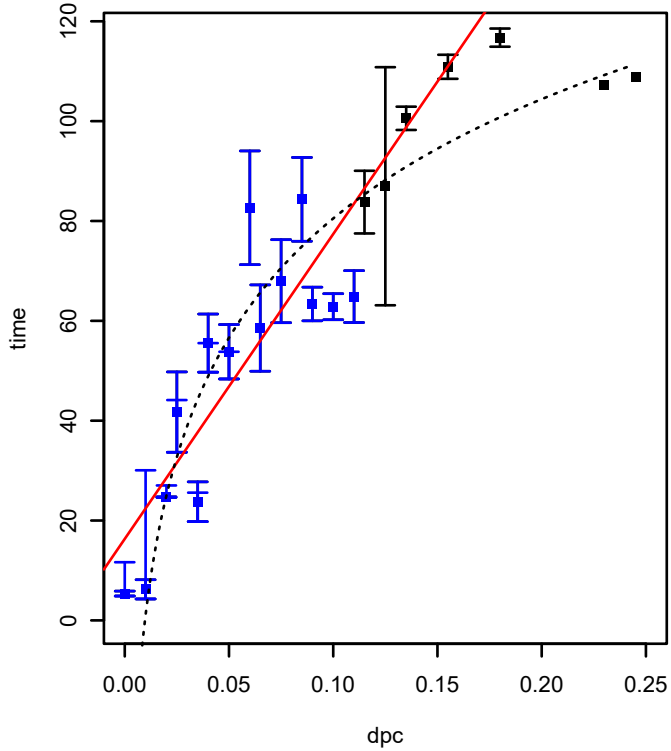**SPO3005 (COG1132) (\*HTCC2255-Basal)**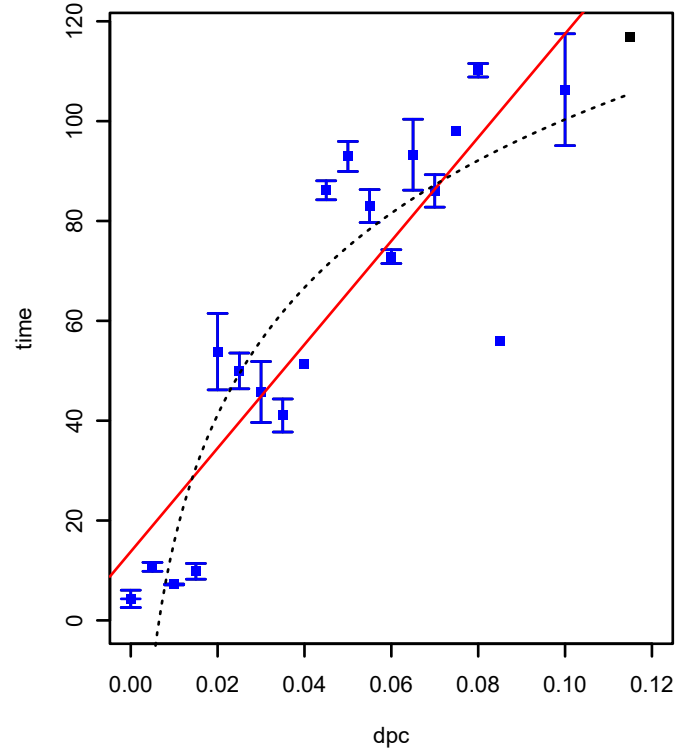**SPO3237 (COG5336) (\*HTCC2255-Basal)**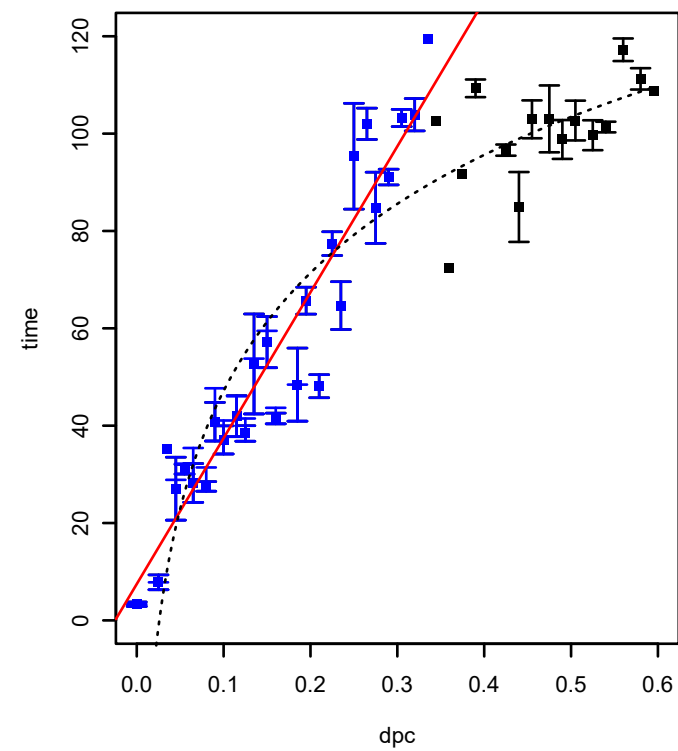**SPO2154 (COG1974)**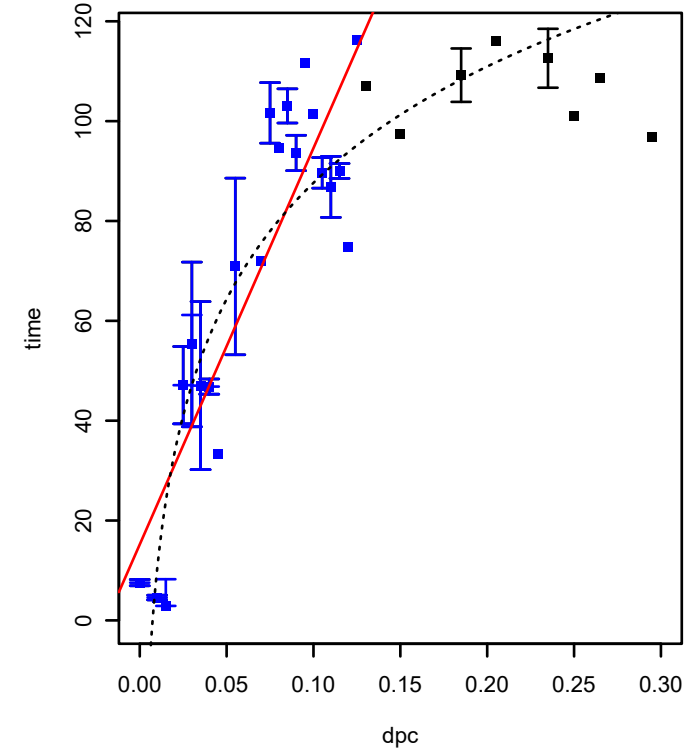

**SPO3448 (COG1194)**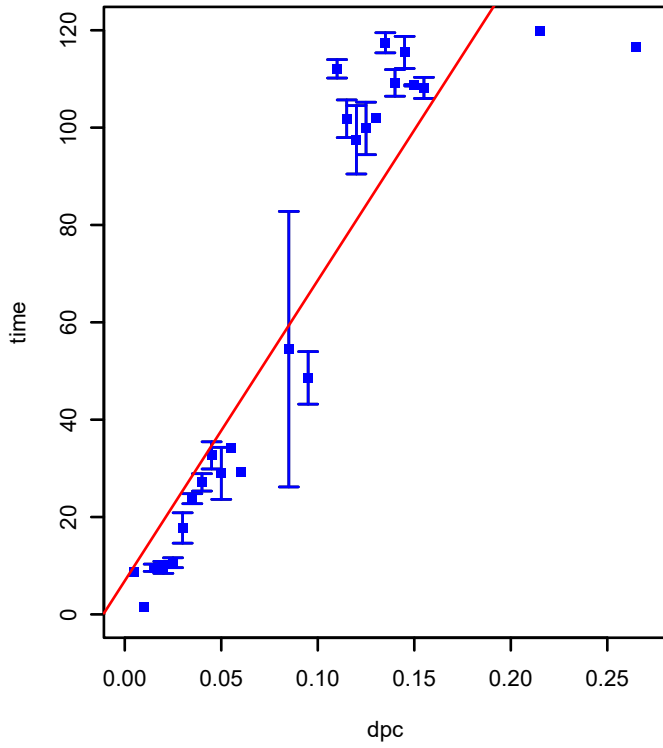**SPO2150 (COG0547) (\*HTCC2255-Basal)**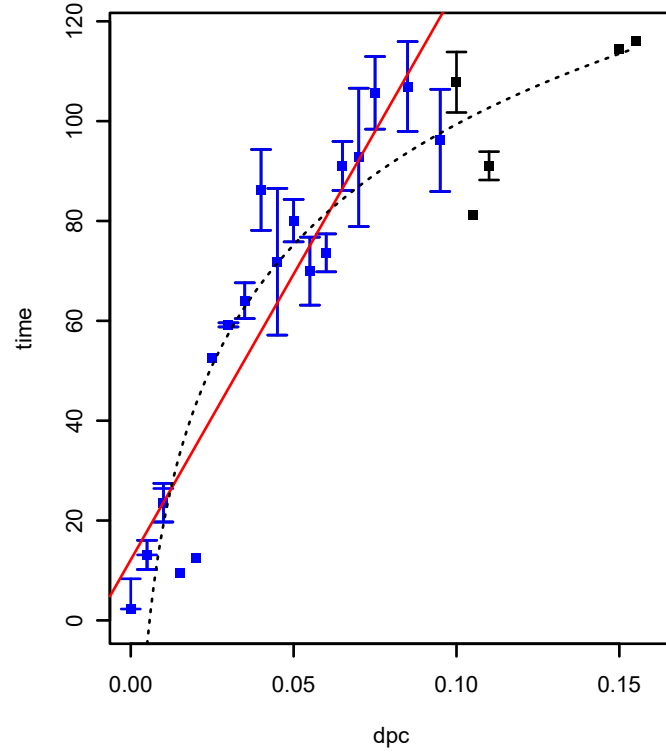**SPO3071 (COG0498) (\*HTCC2255-Basal)**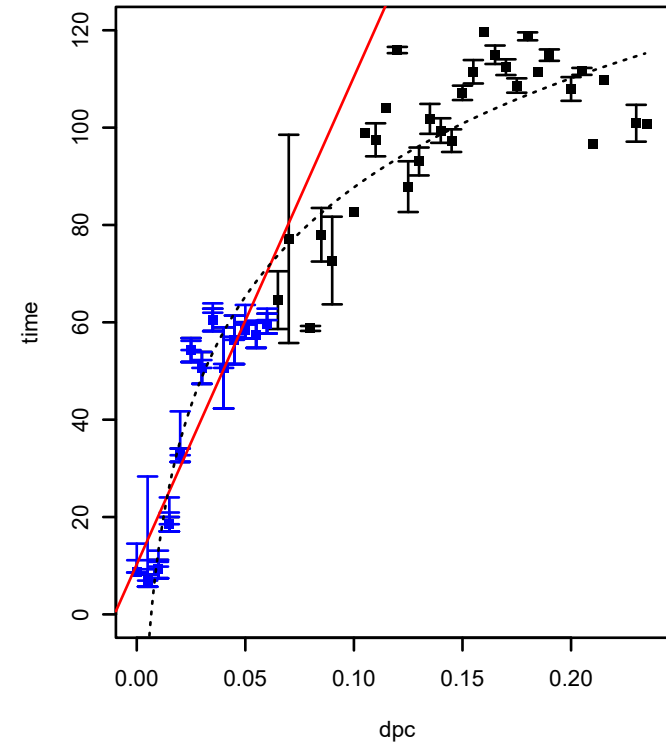**SPO0024 (COG1281) (\*HTCC2255-Basal)**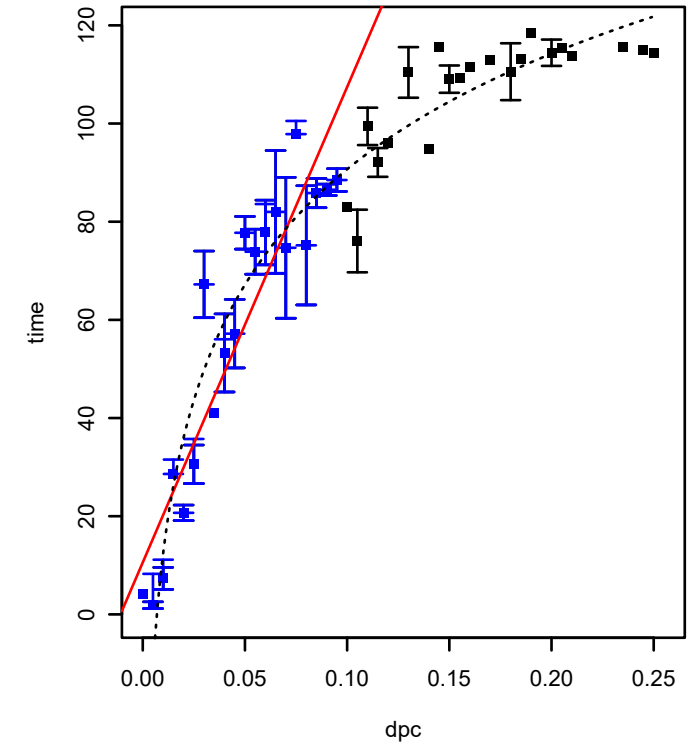**SPO0523 (COG2062)**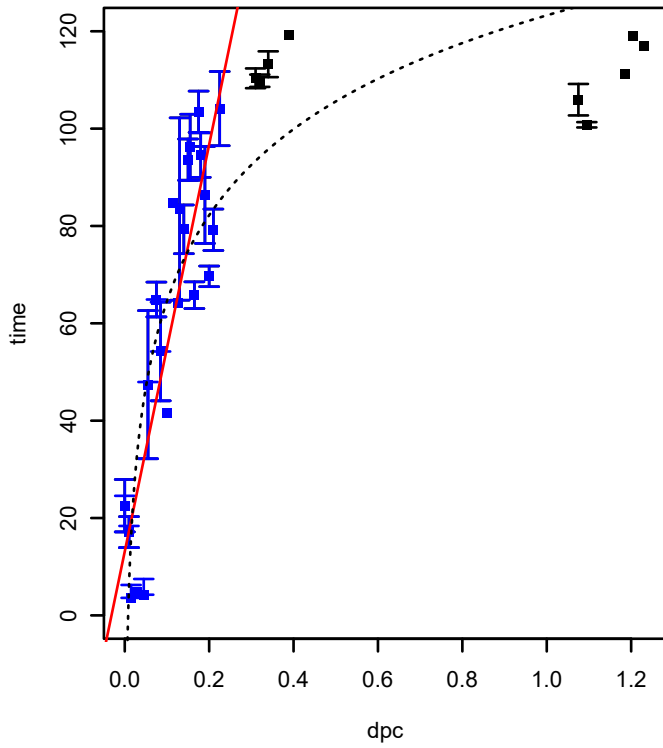**SPO3440 (COG4221) (\*HTCC2255-Basal)**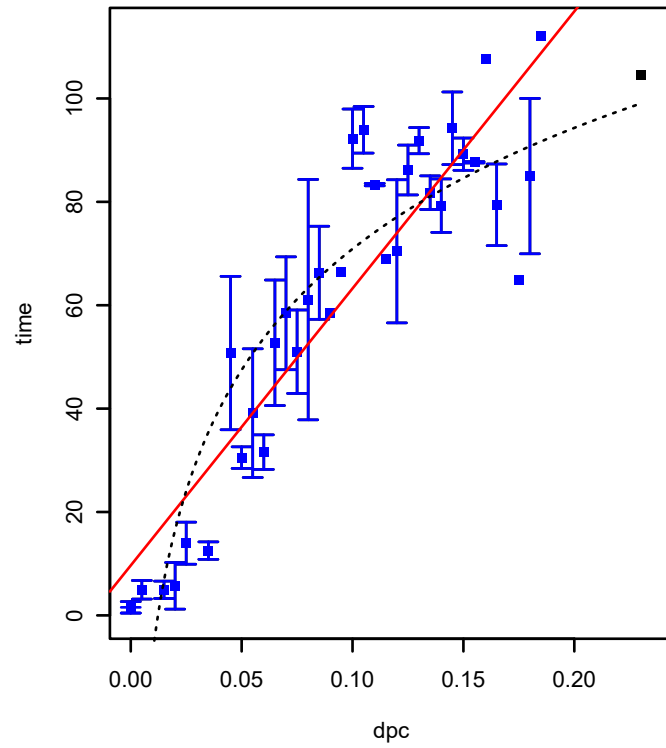**SPO3282 (COG3741) (\*HTCC2255-Basal)**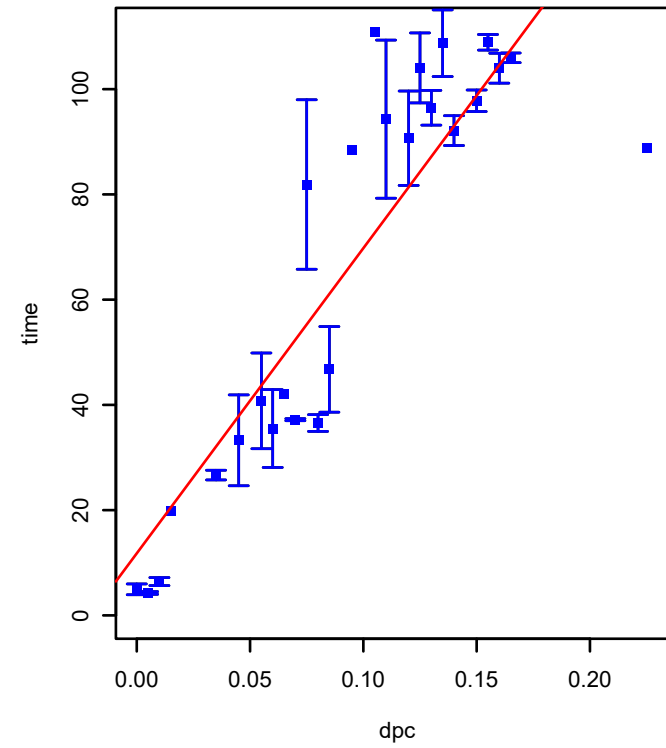**SPO0004 (COG1475) (\*HTCC2255-Basal)**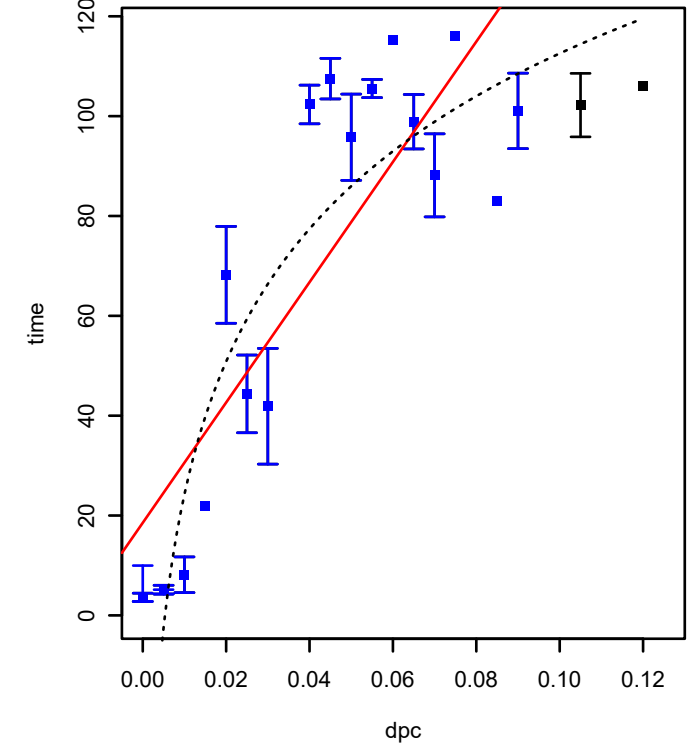

**SPO0001 (COG0445)**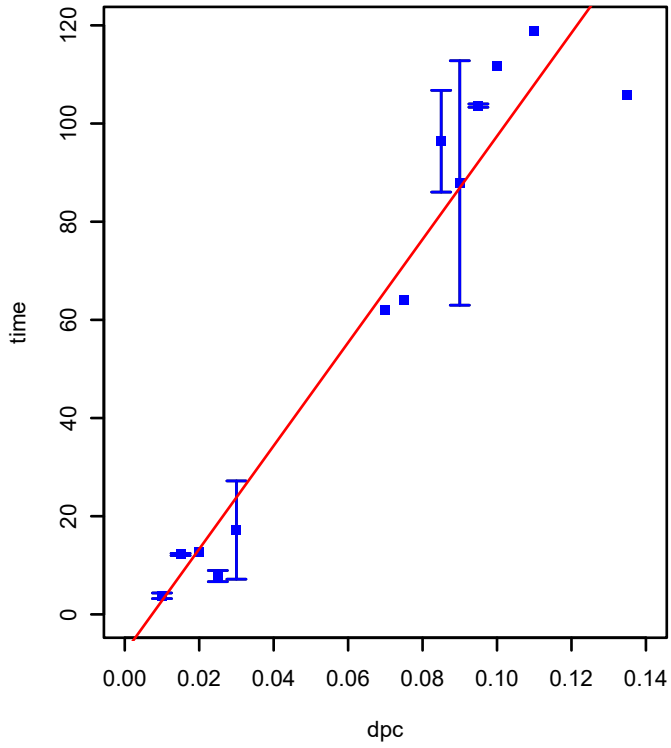**SPO1244 (COG0231)**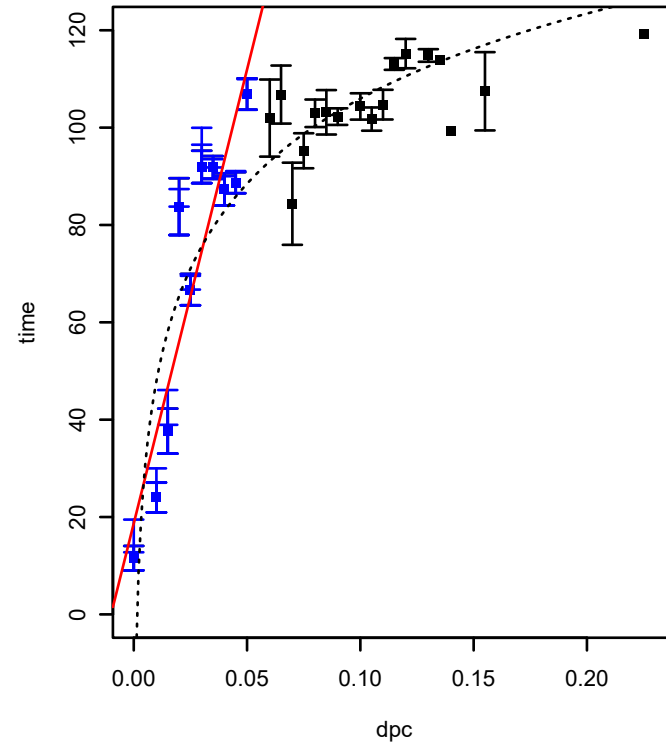**SPO3120 (COG2264) (\*HTCC2255-Basal)**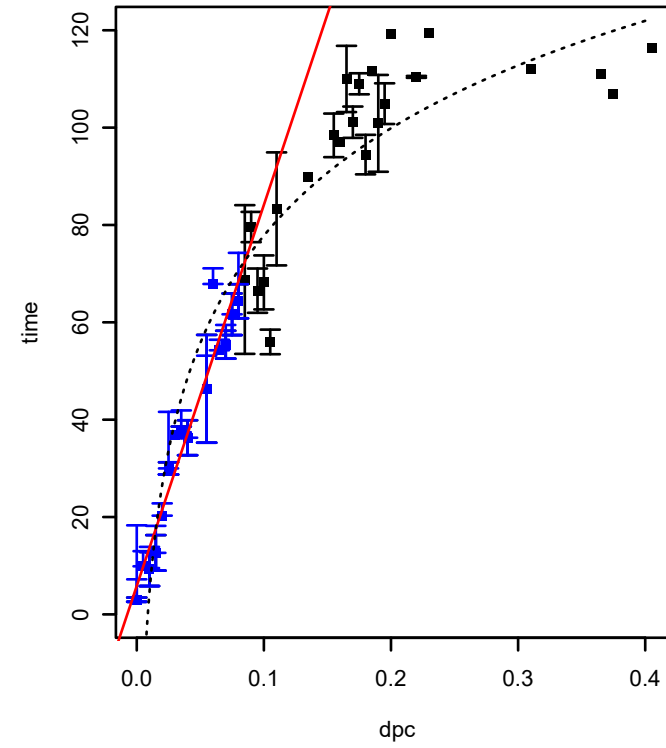**SPO0078 (COG1544) (\*HTCC2255-Basal)**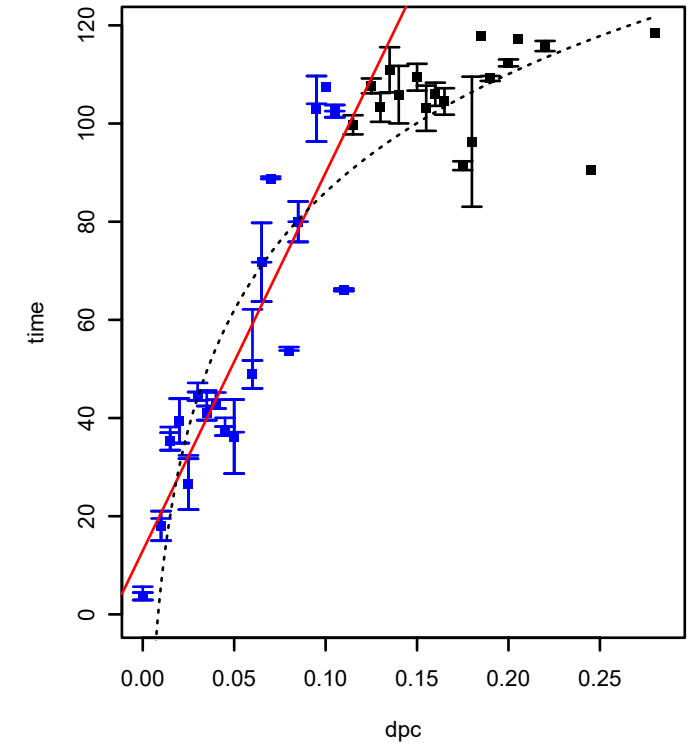**SPO0339 (COG0204) (\*HTCC2255-Basal)**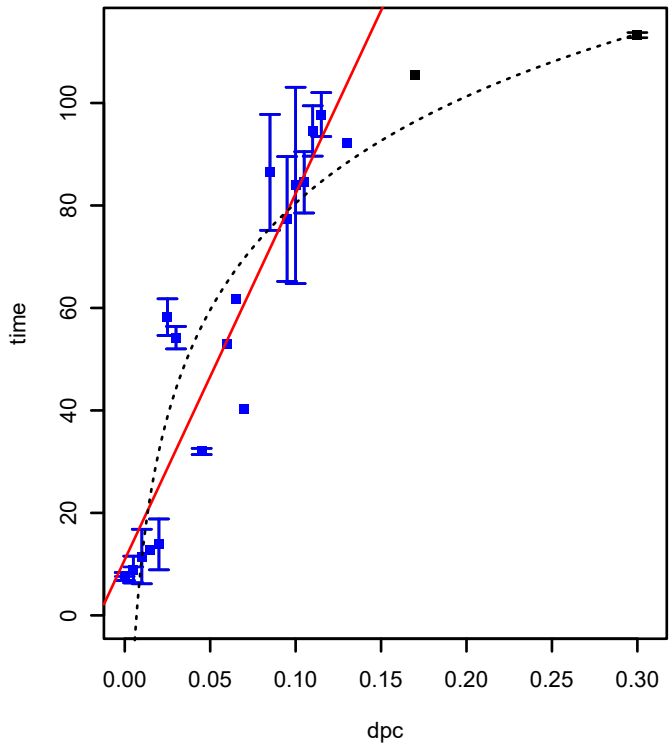**SPO2958 (COG0483) (\*HTCC2255-Basal)**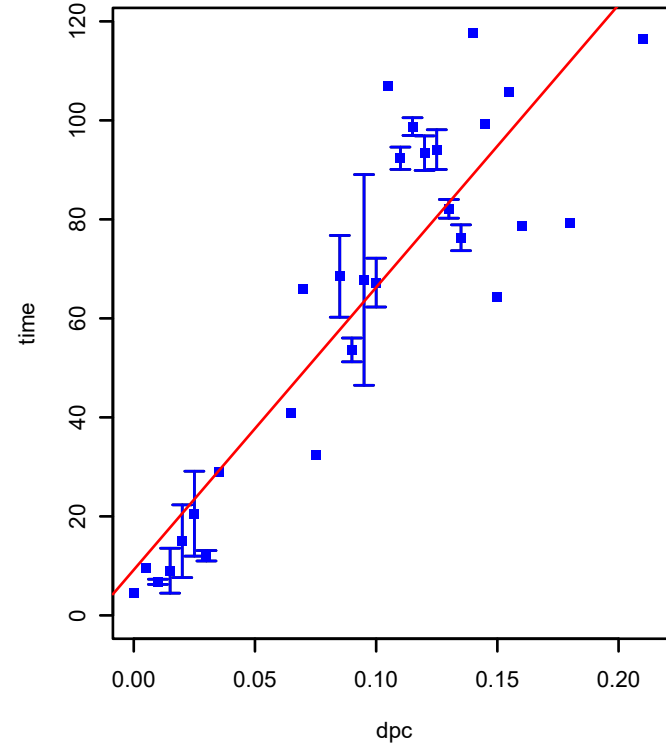

Supplement: ismej201720x3.pdf [file ismej201720x3.pdf]
