# Supplementary material
Source: PubMed Central journal article supplement (PMC5584476)

Fig. S4

Cullen and Frey graph

LWR:LCA1

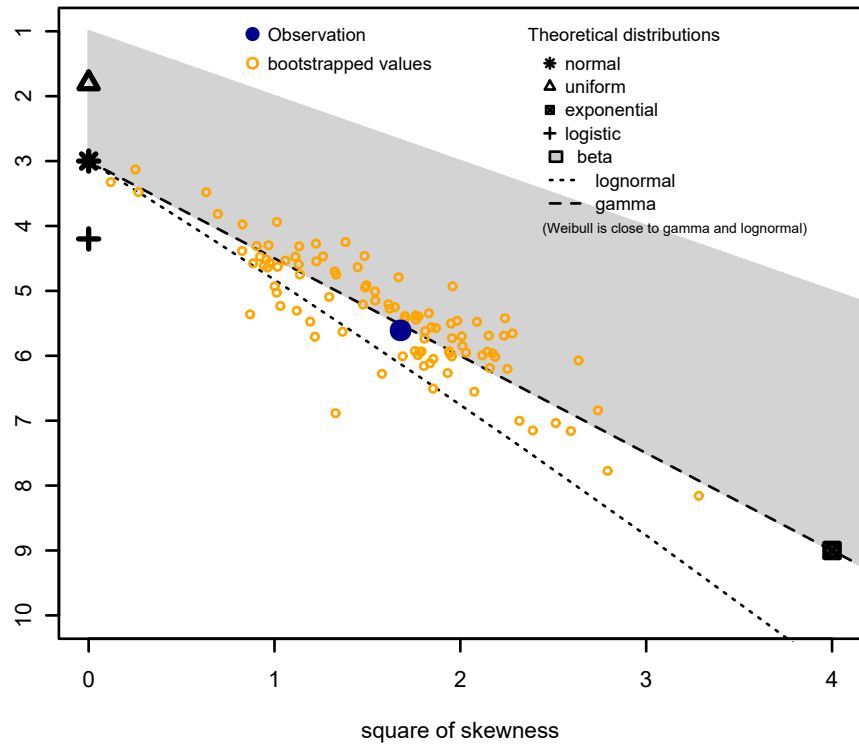

Cullen and Frey graph

FIT:LCA1

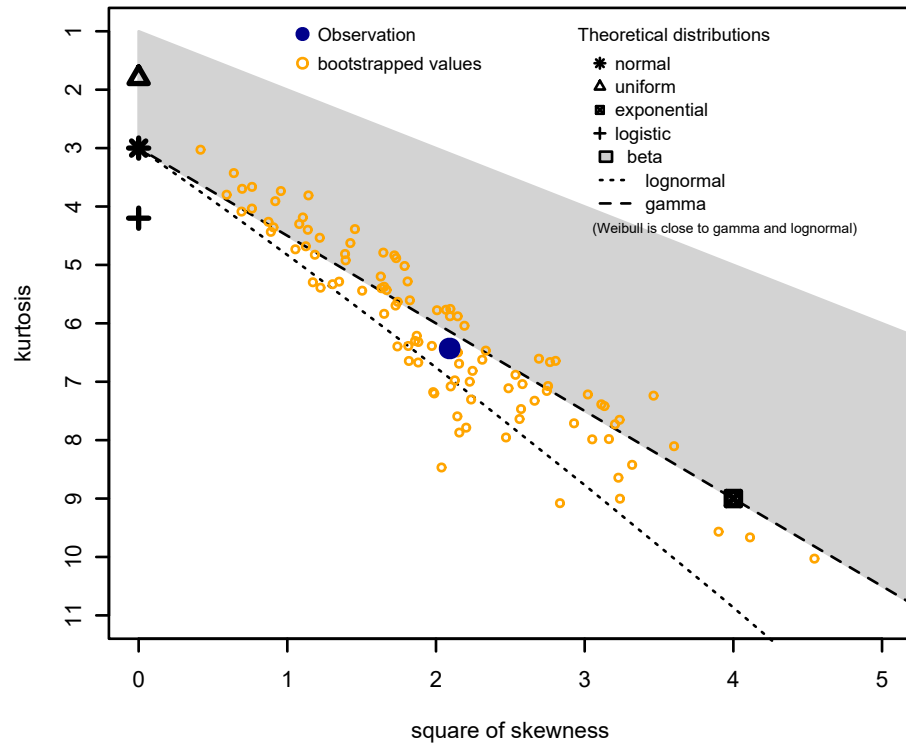

Cullen and Frey graph

UPR:LCA1

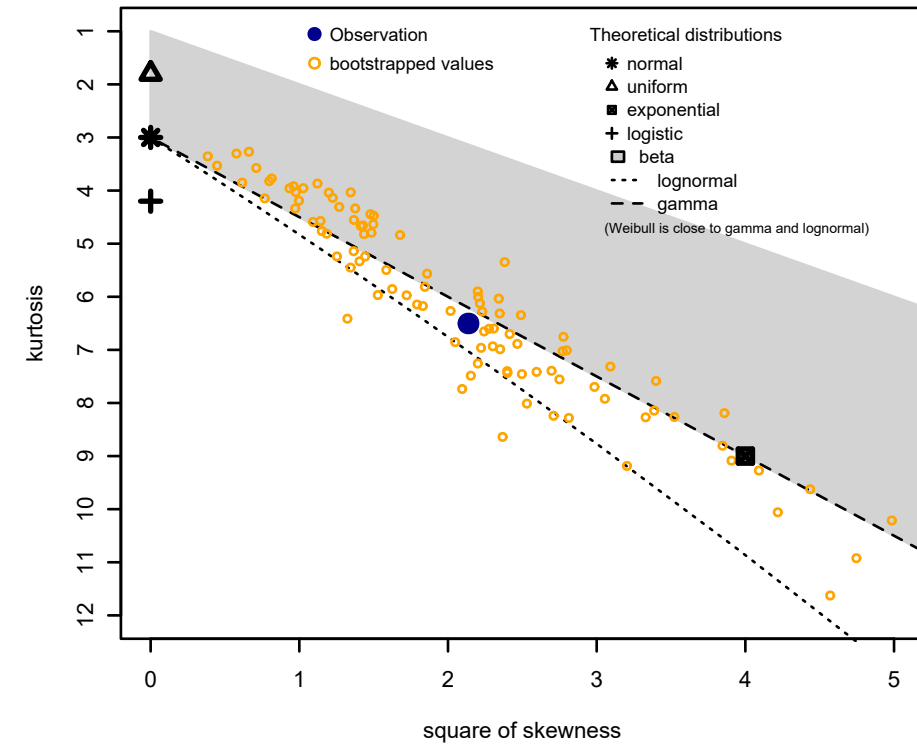

Cullen and Frey graph

LWR:LCA2

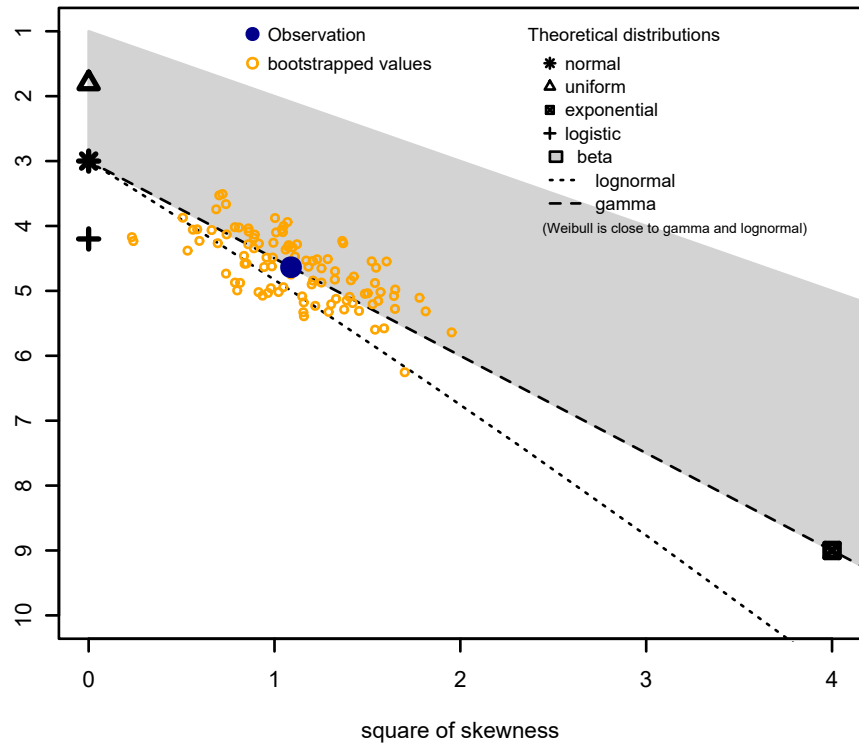

Cullen and Frey graph

FIT:LCA2

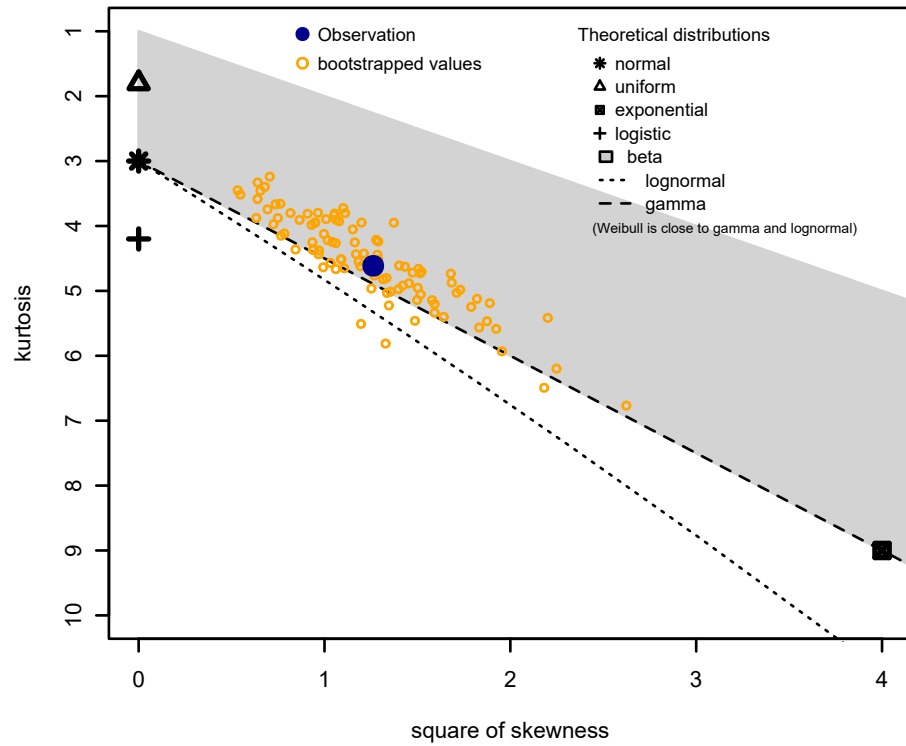

Cullen and Frey graph

UPR:LCA2

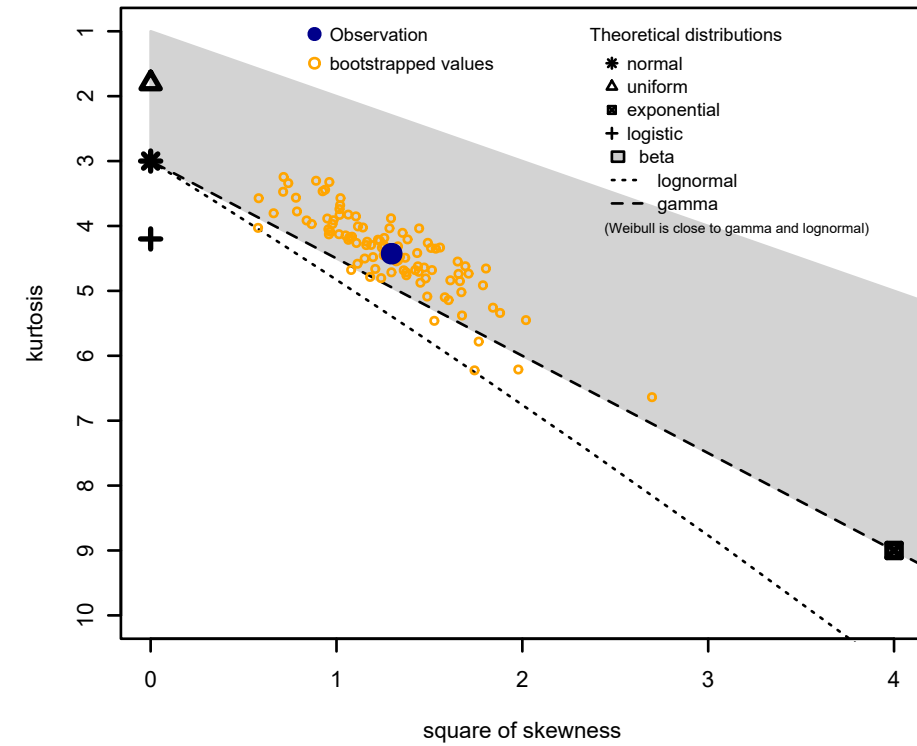

LWR: LCA1 (NORMAL: AIC=2379.58908261752)

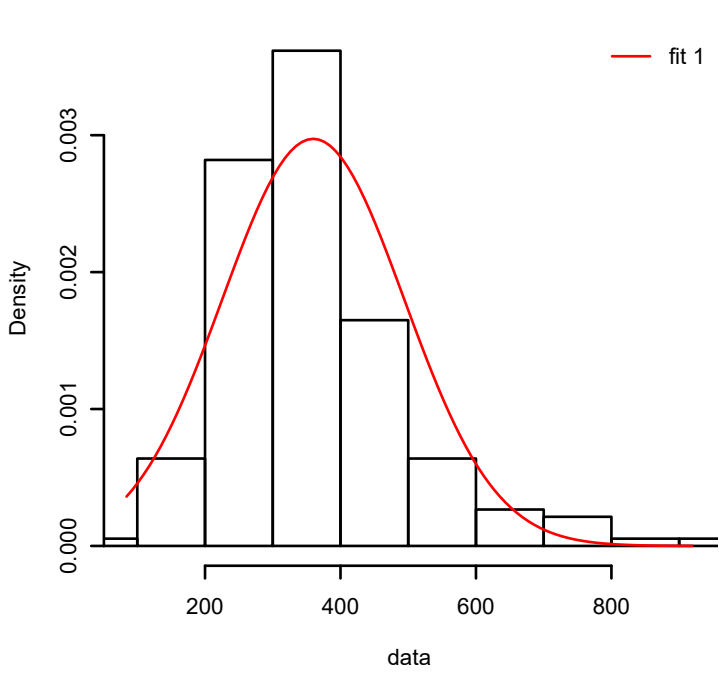

Q-Q plot

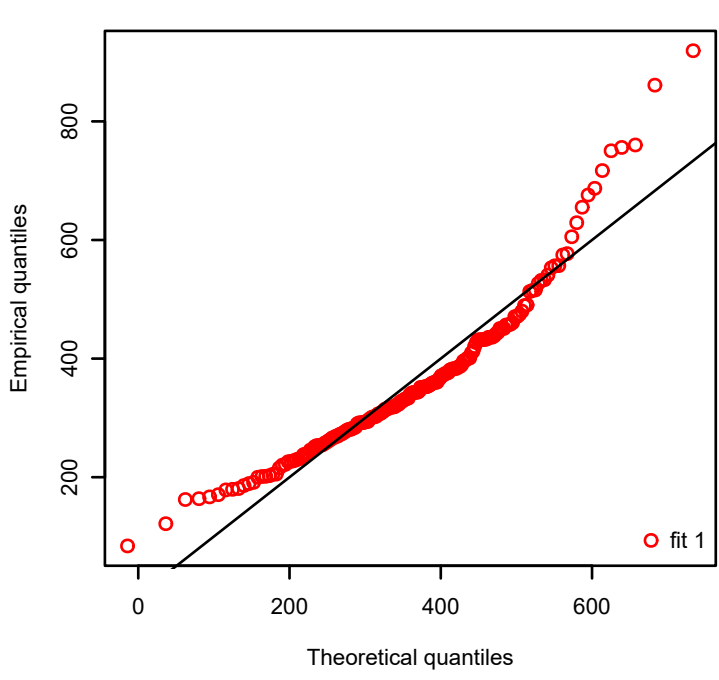

Histogram and theoretical densities

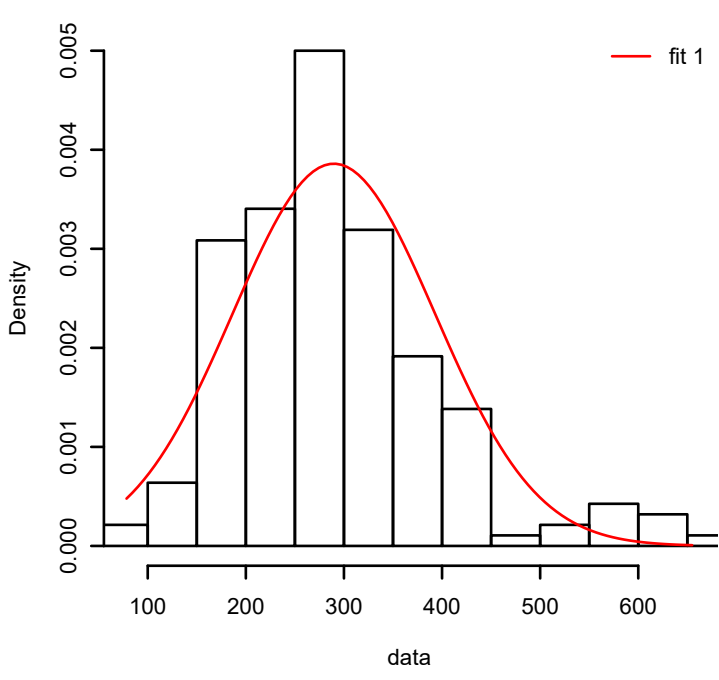

Q-Q plot

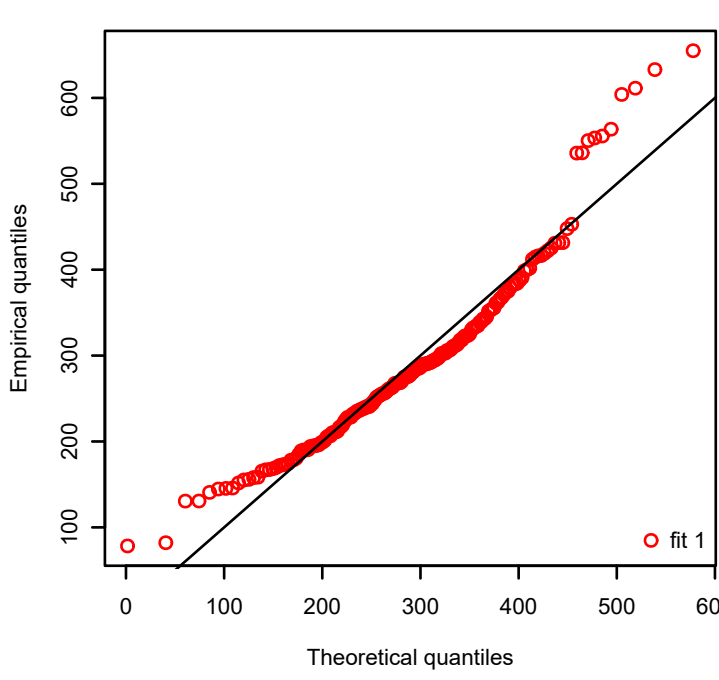

Histogram and theoretical densities

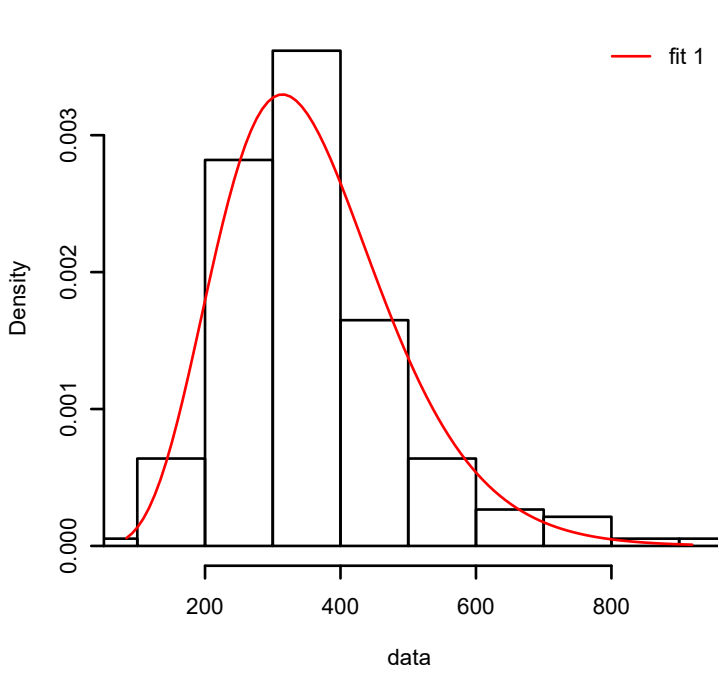

Q-Q plot

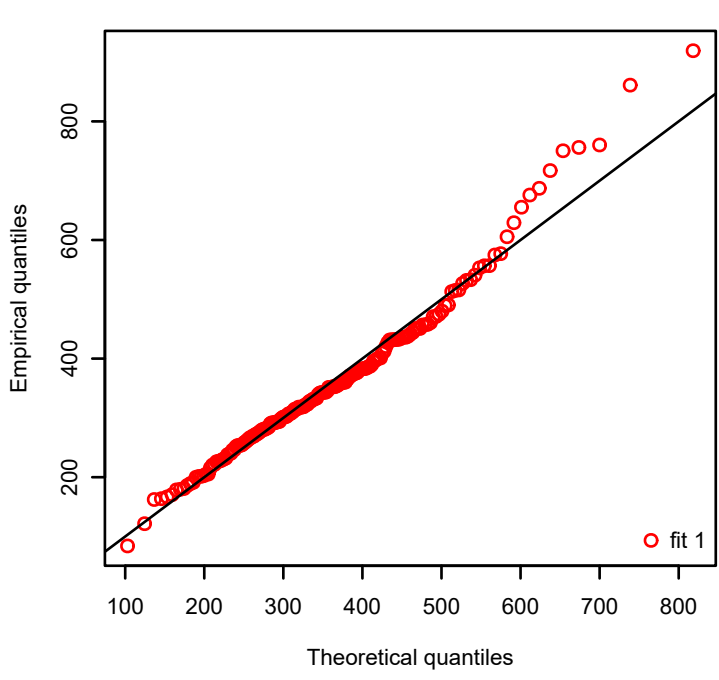

Histogram and theoretical densities

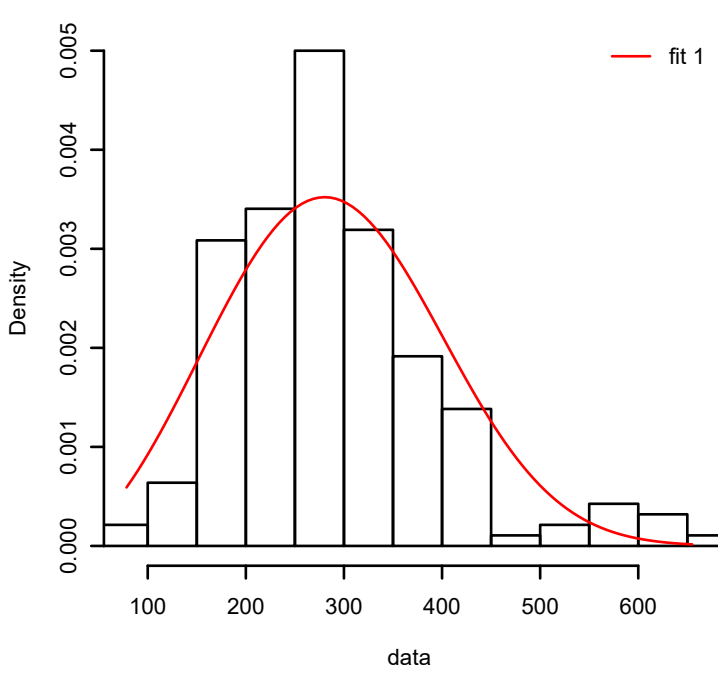

Q-Q plot

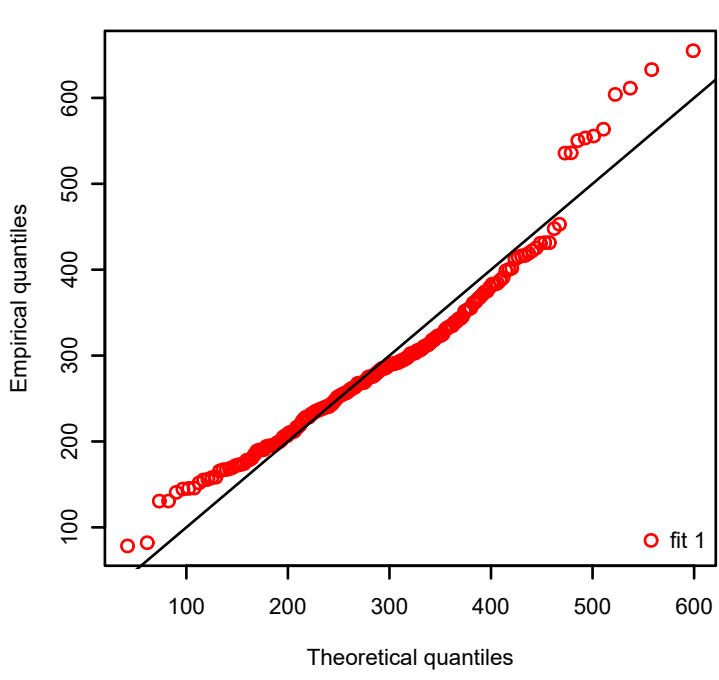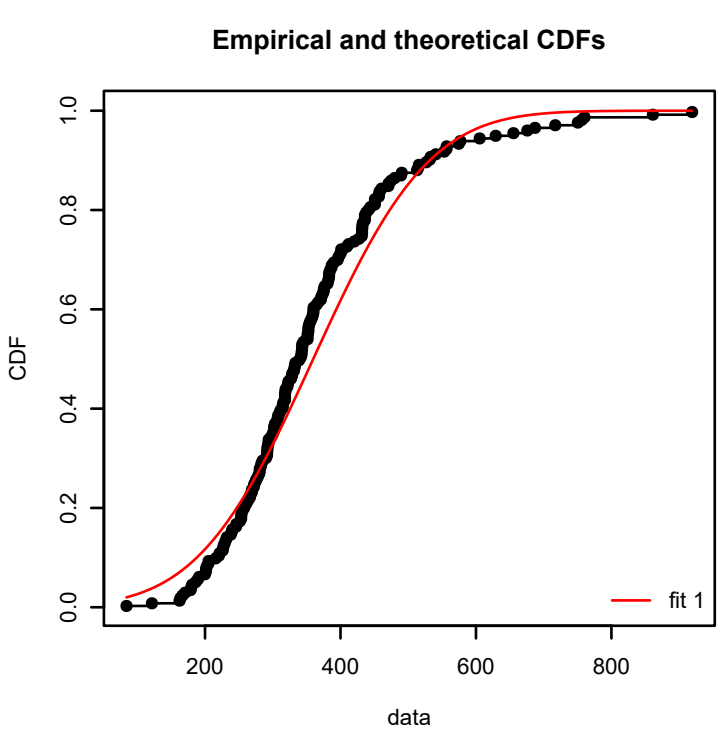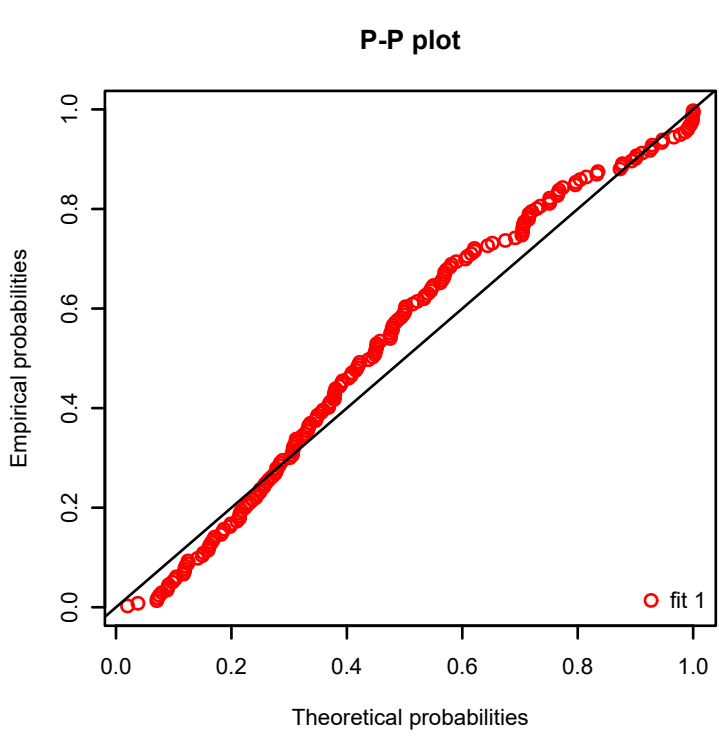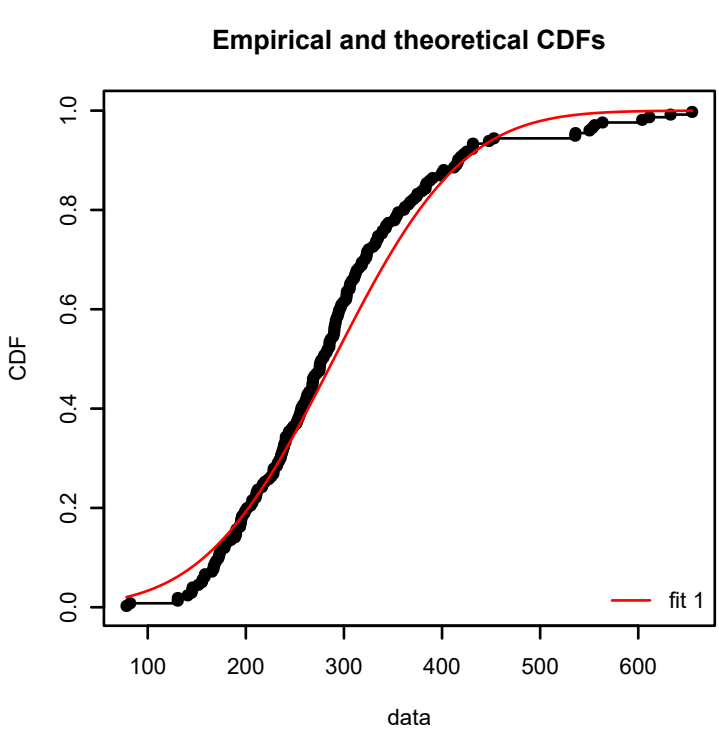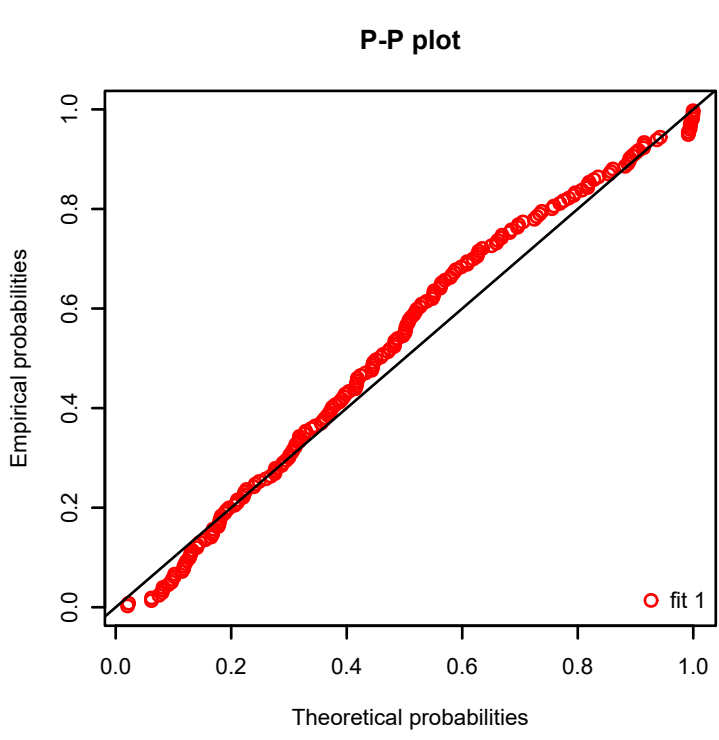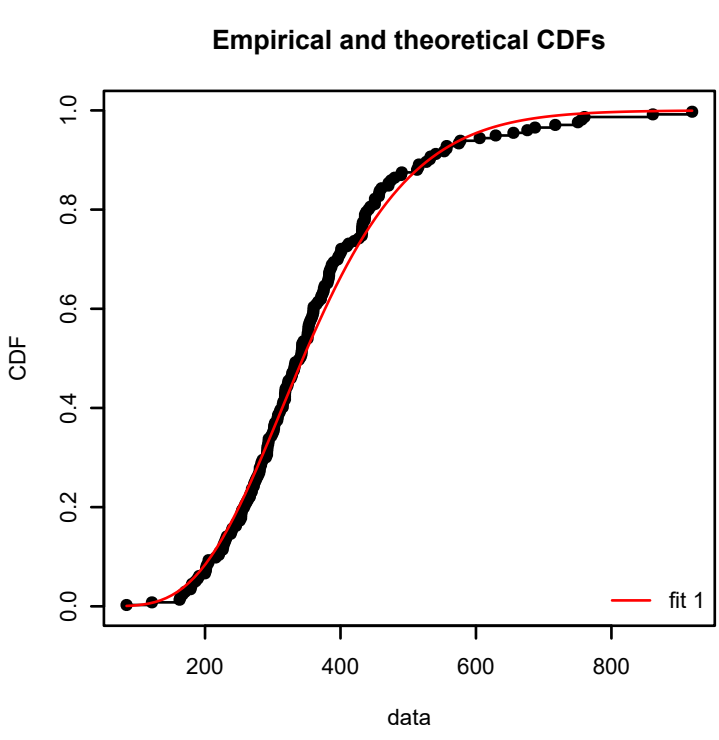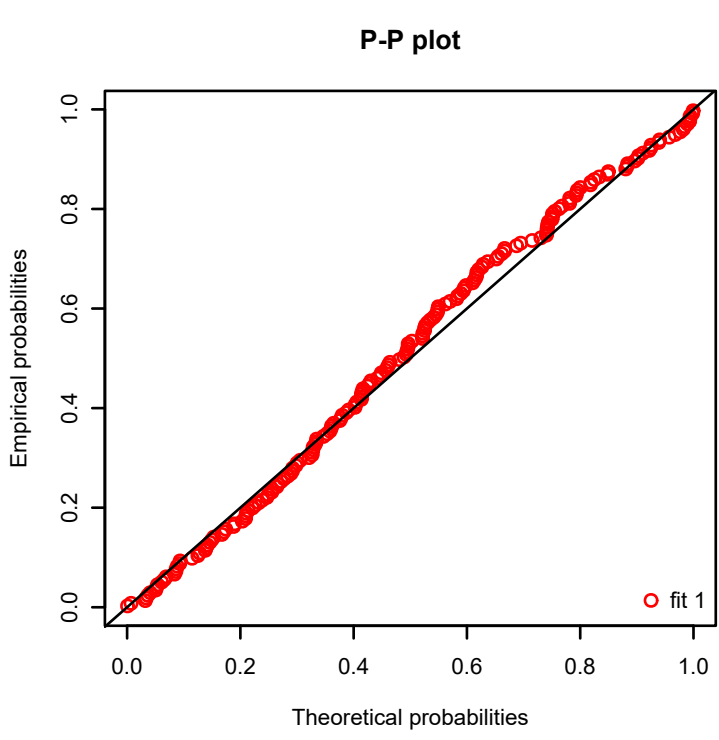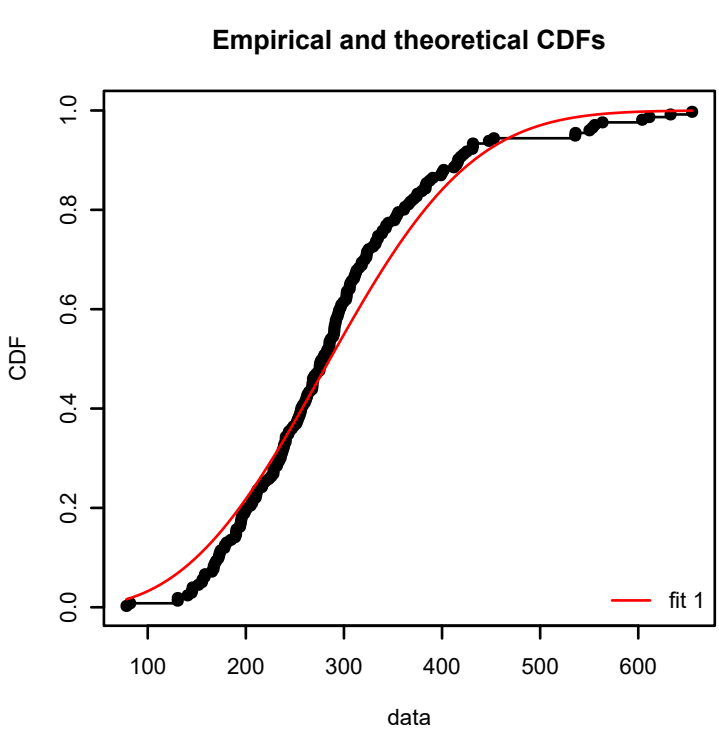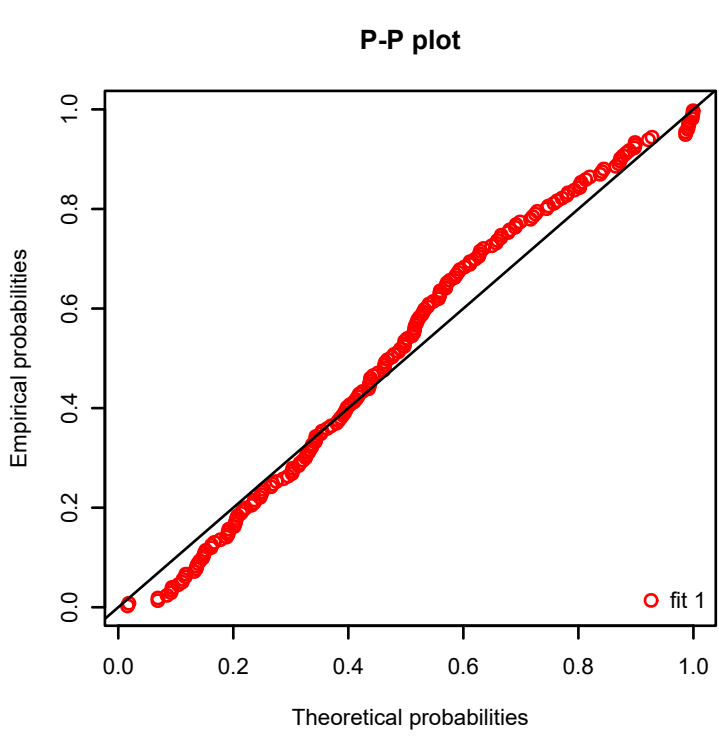

LWR: LCA2 (NORMAL: AIC=2281.53086086428)

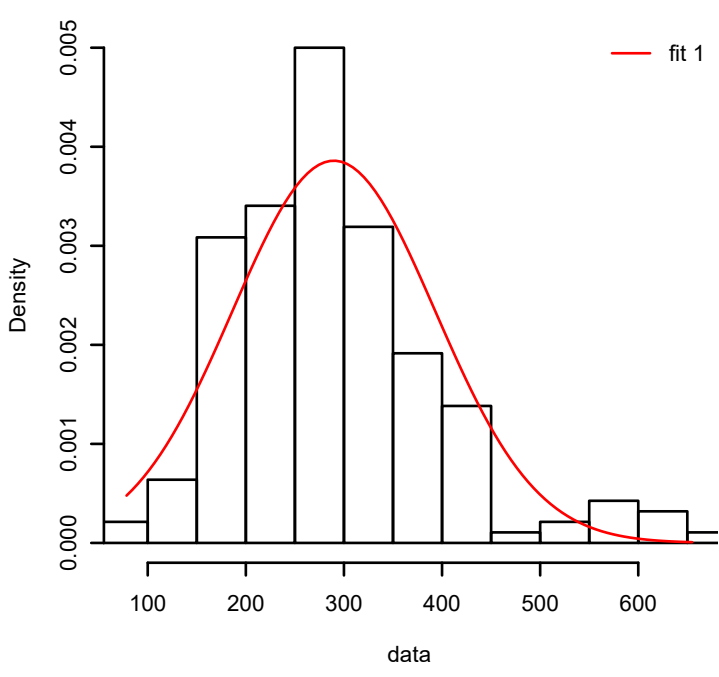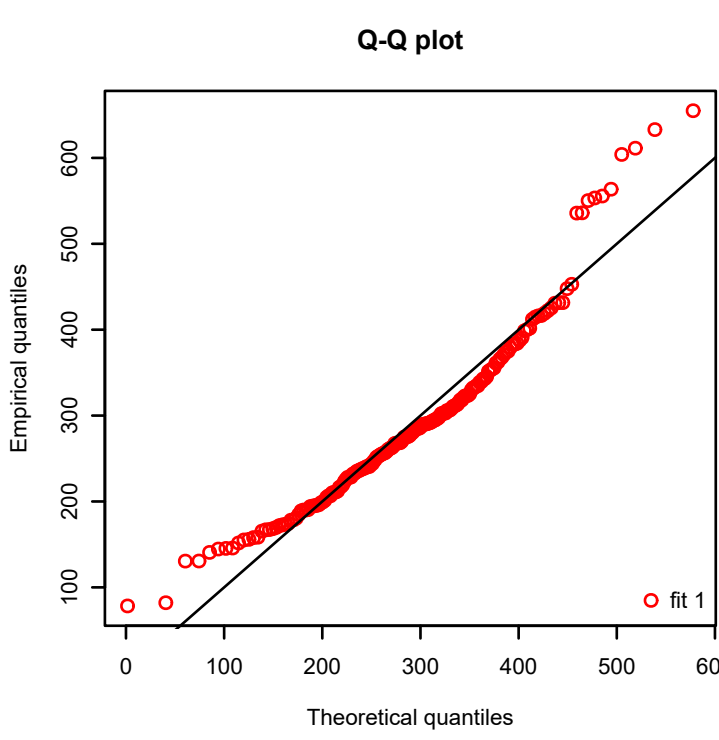

LWR: LCA2 (WEIBULL: AIC=2278.36893043003)

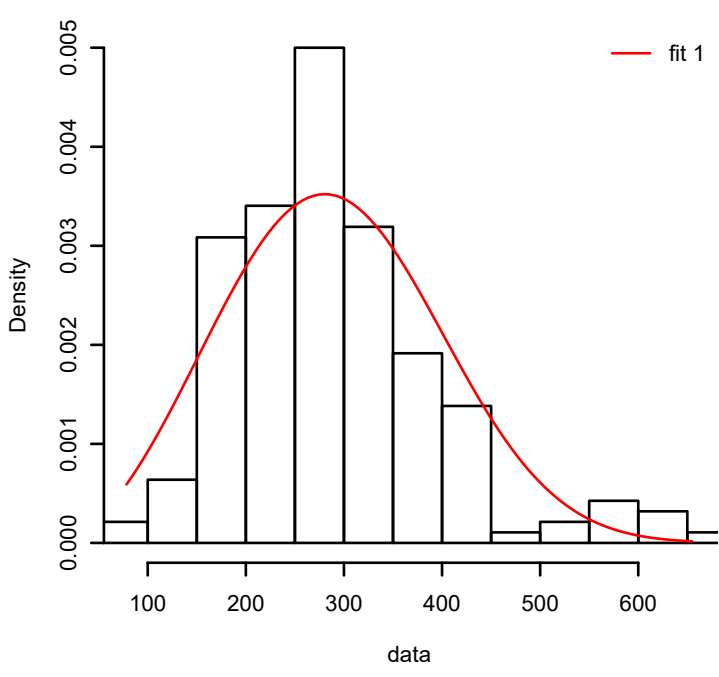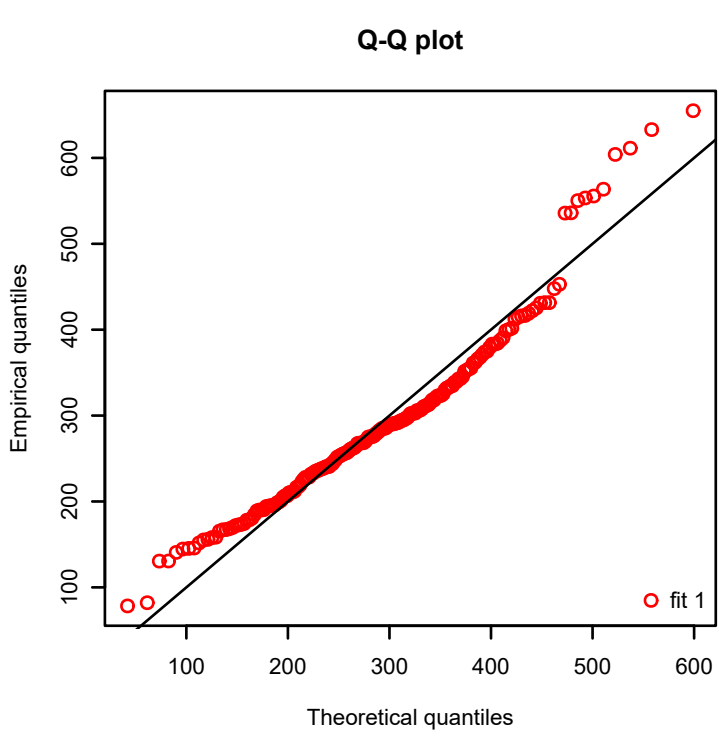

LWR: LCA2 (GAMMA: AIC=2255.4273752316)

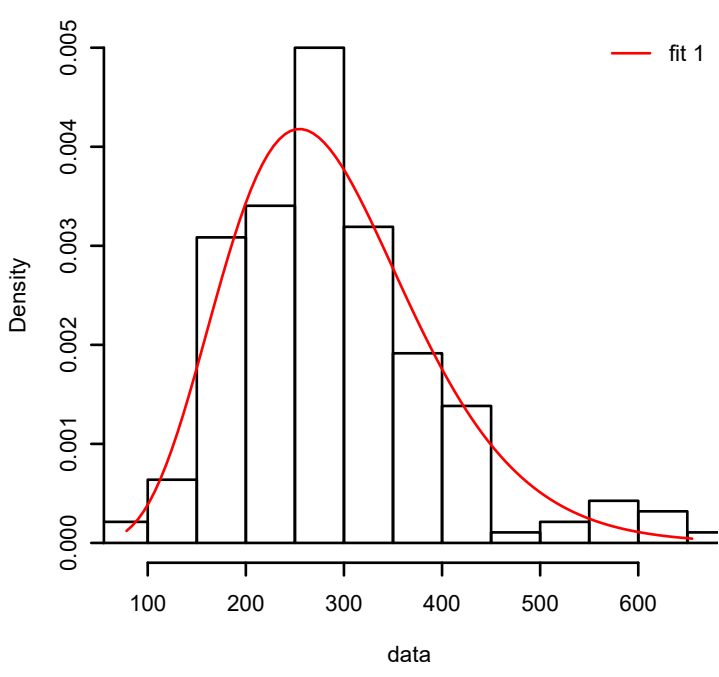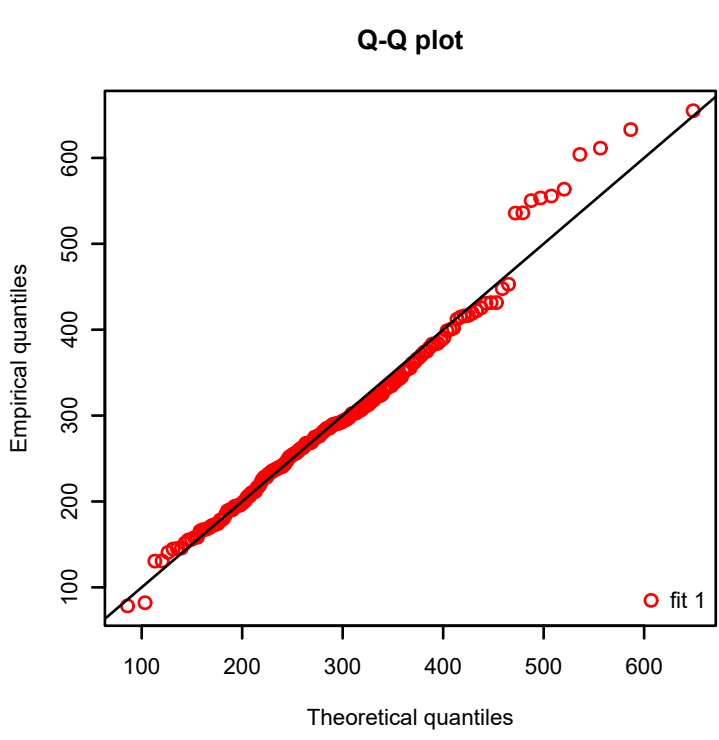

LWR: LCA2 (LOGNORMAL: AIC=2255.63058297843)

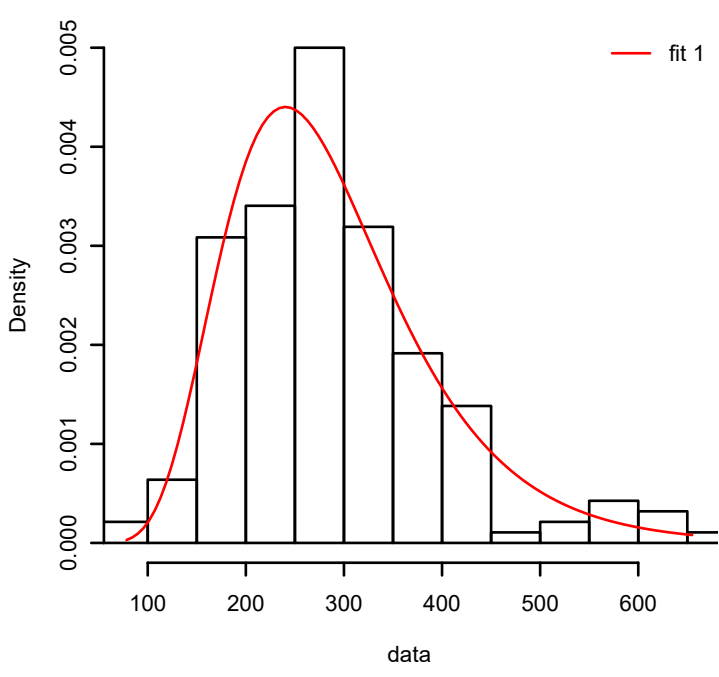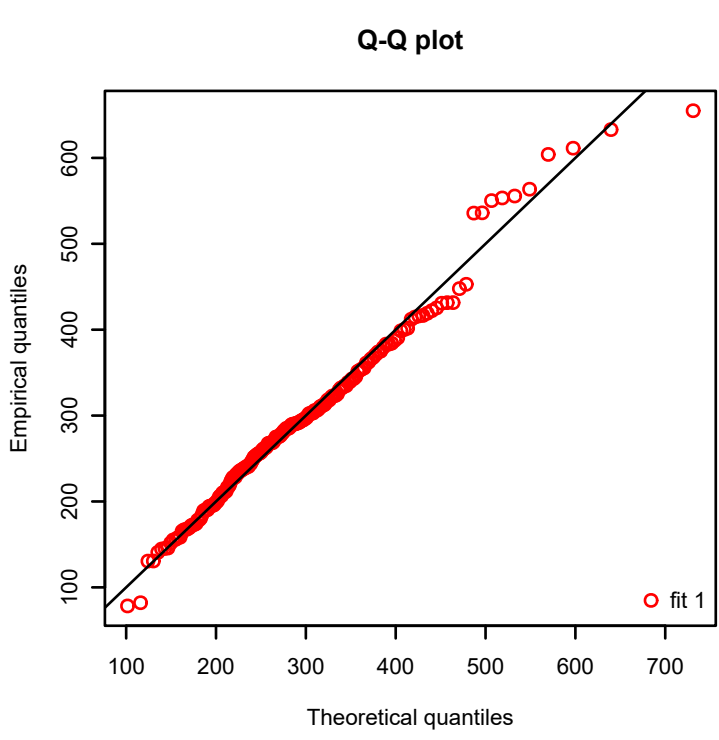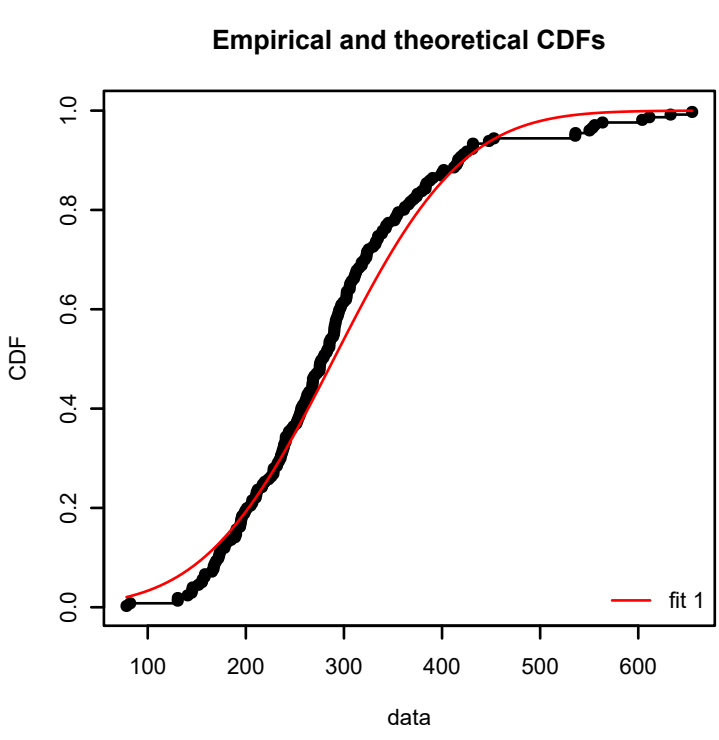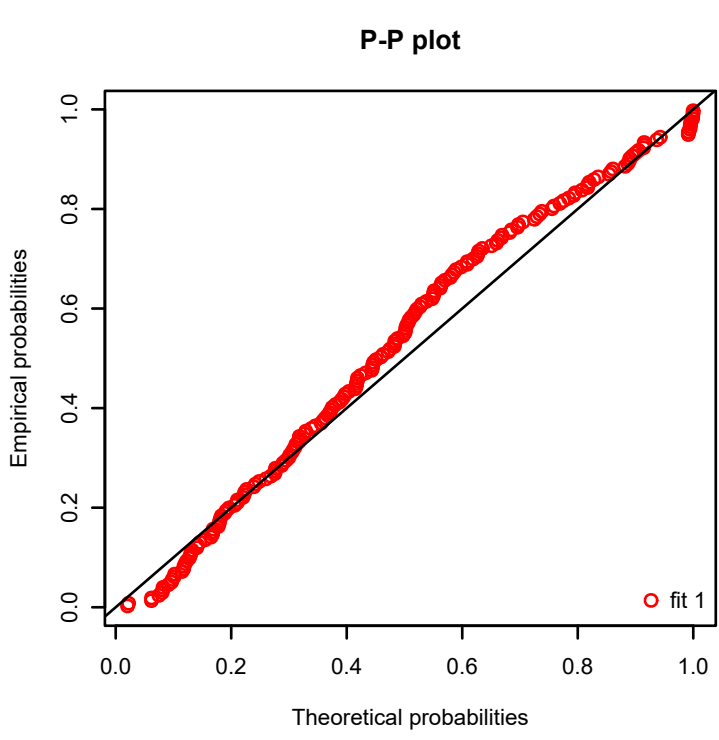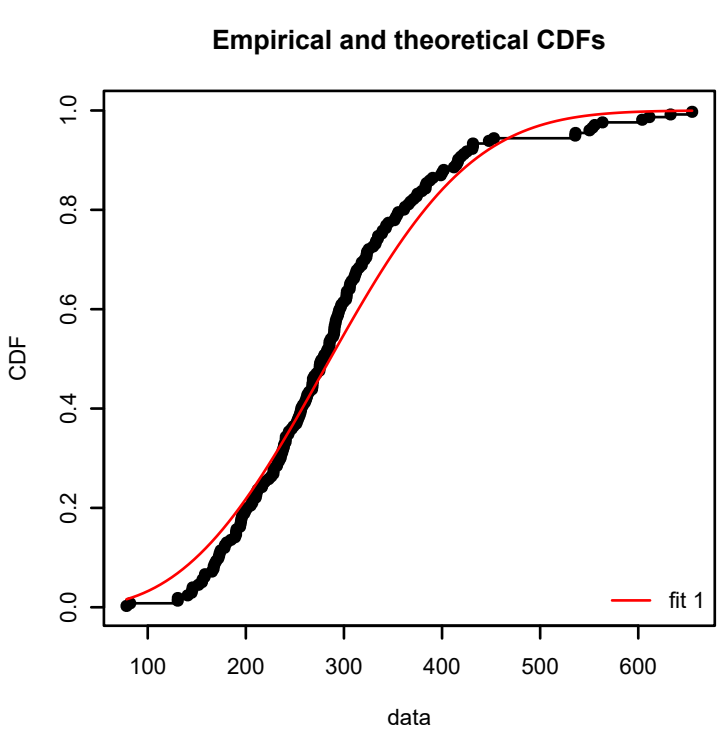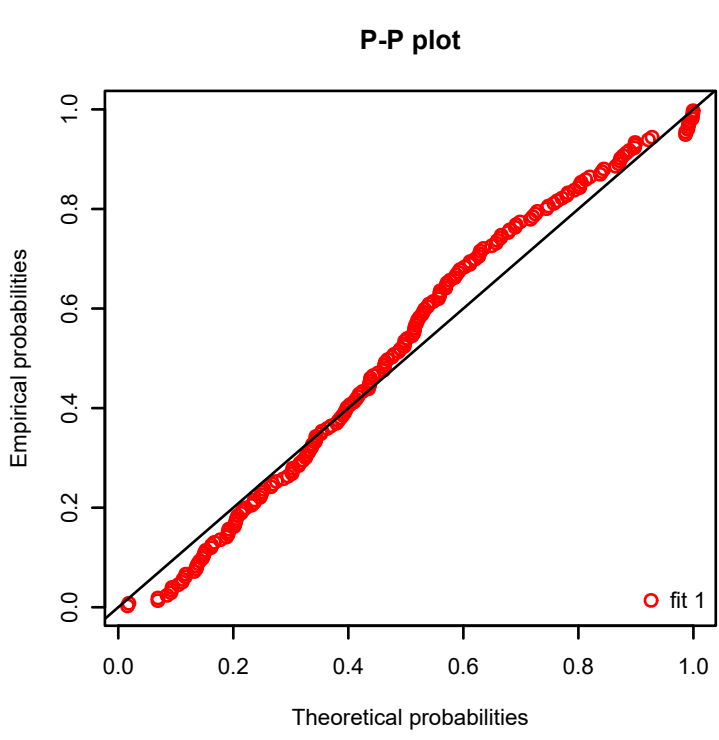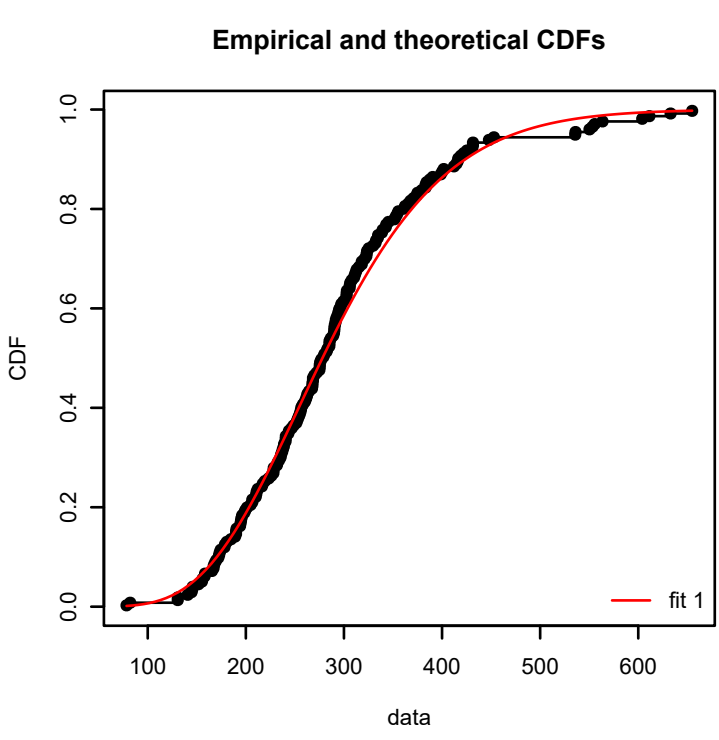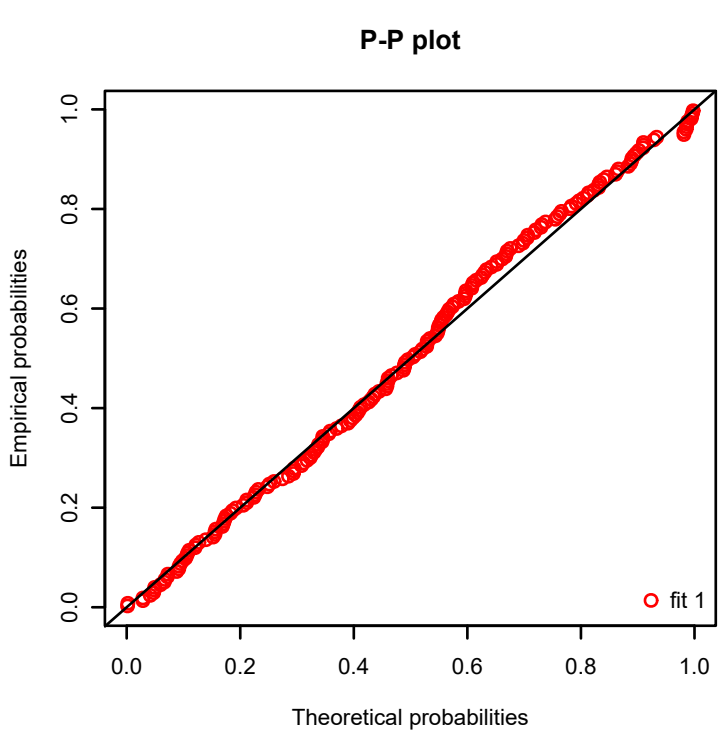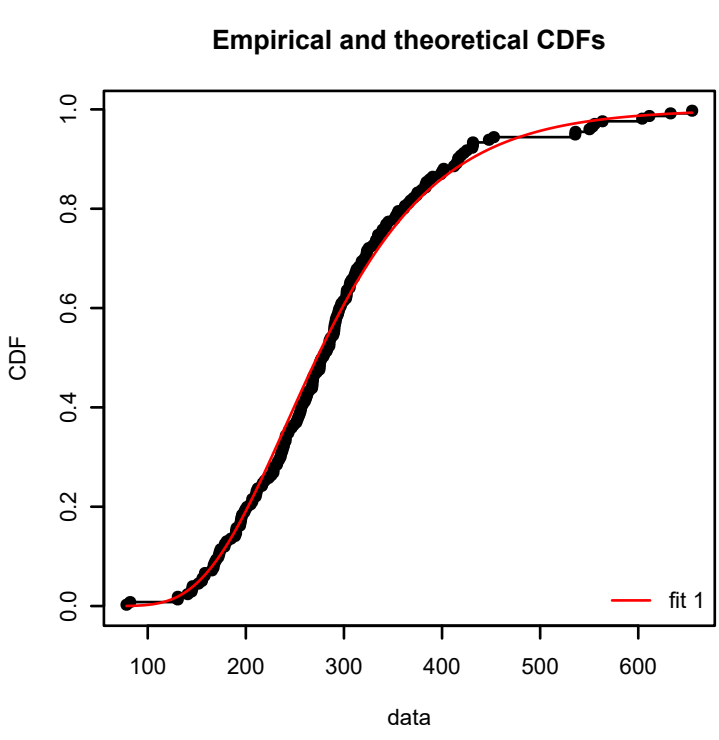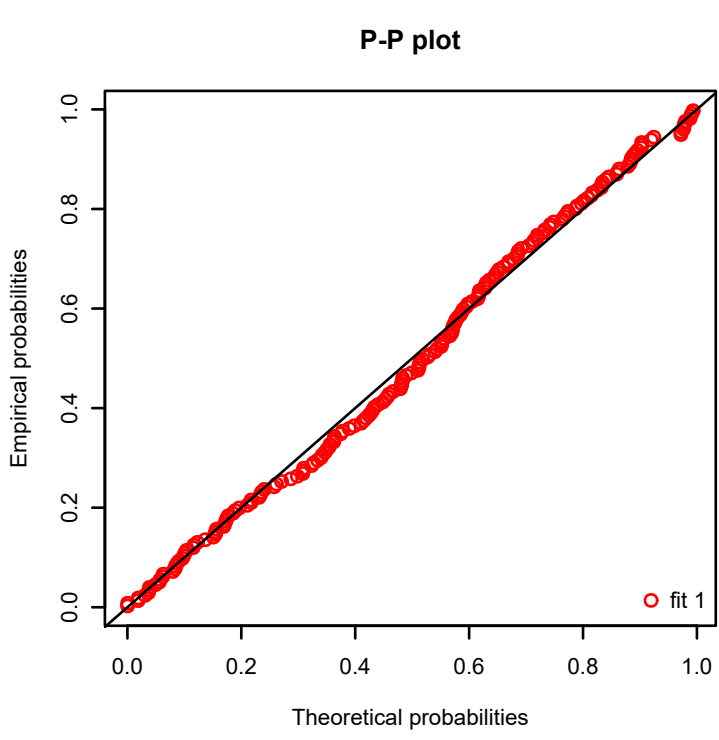

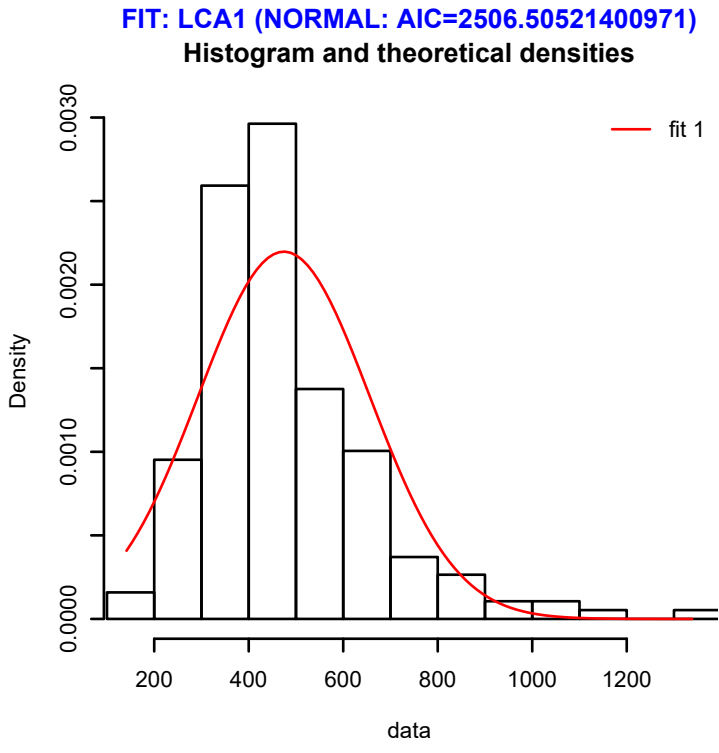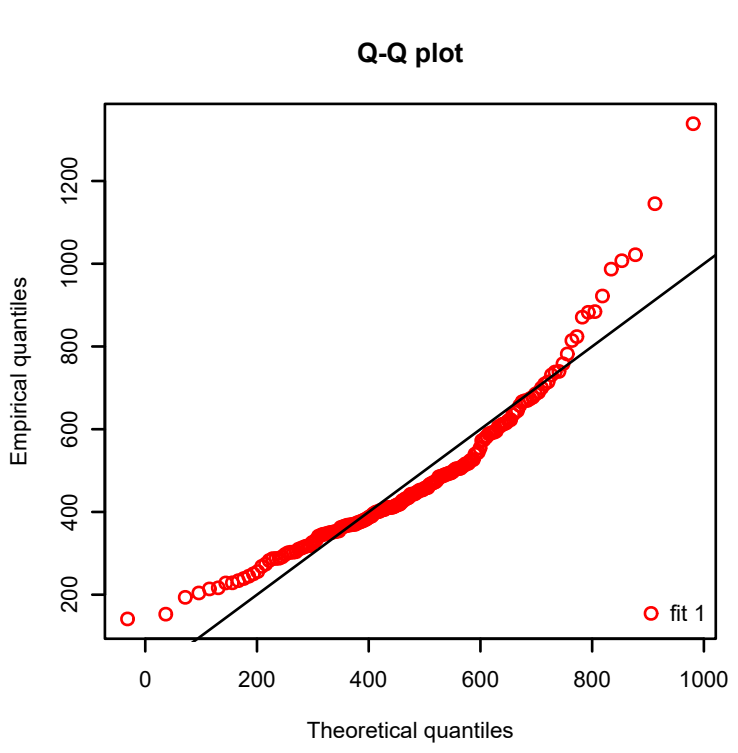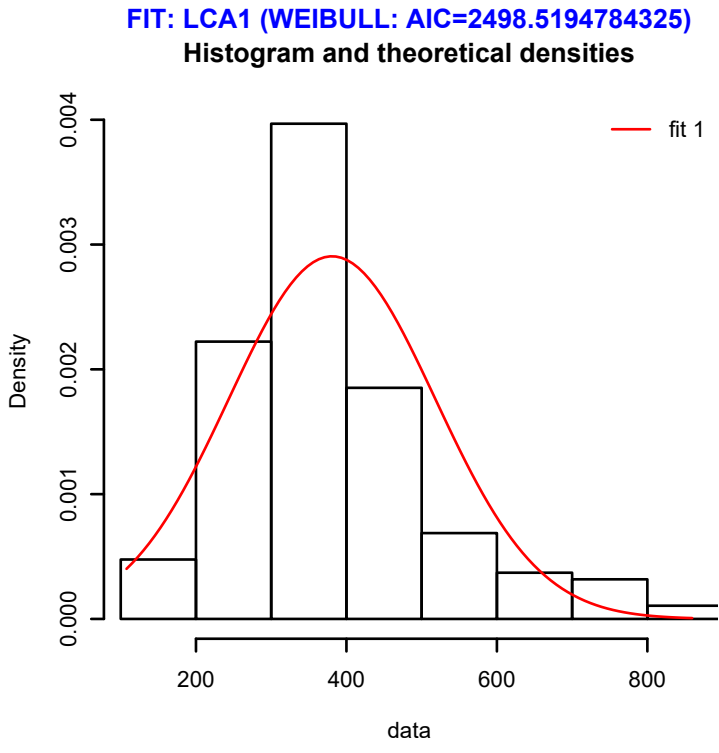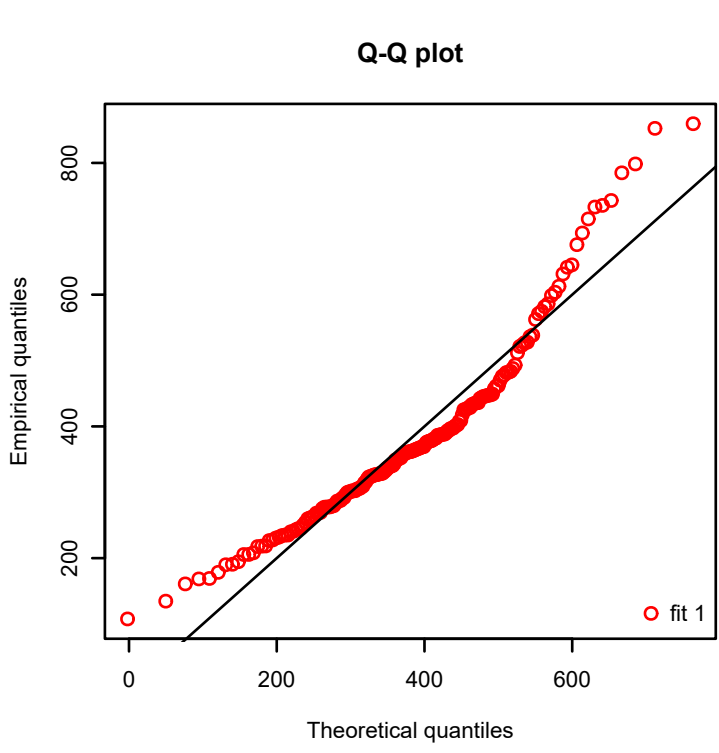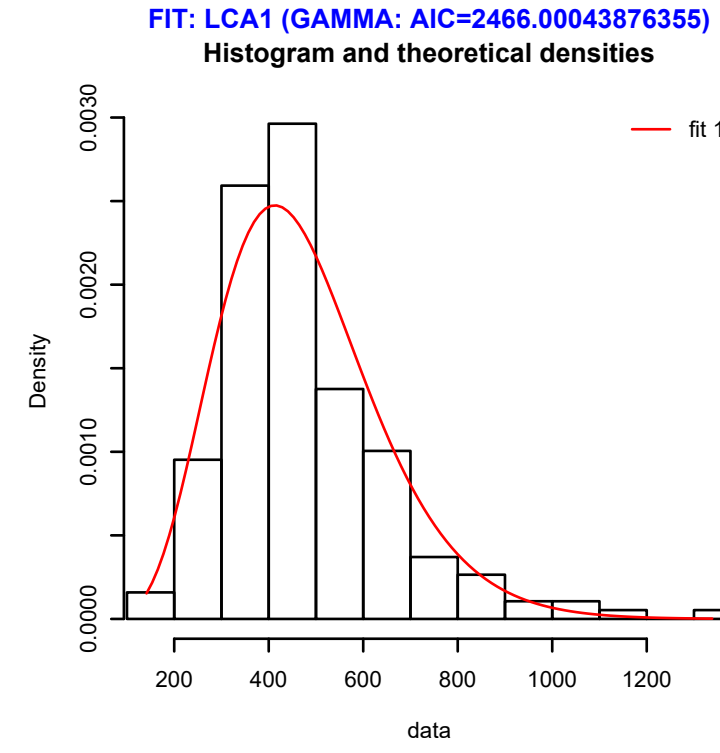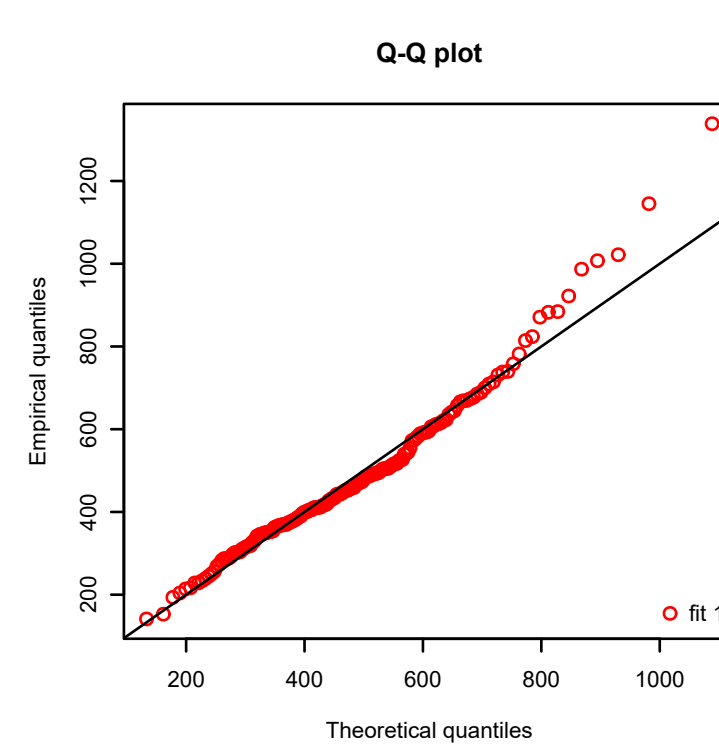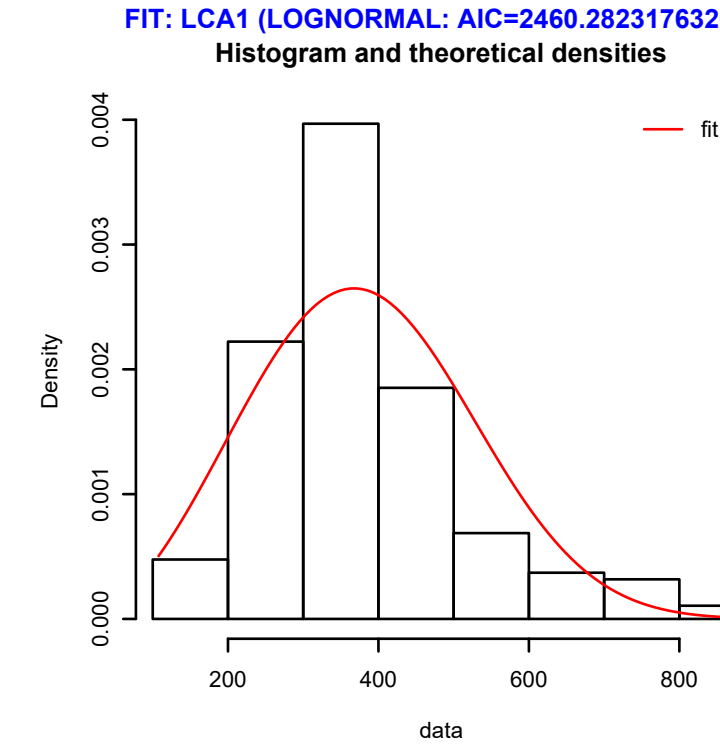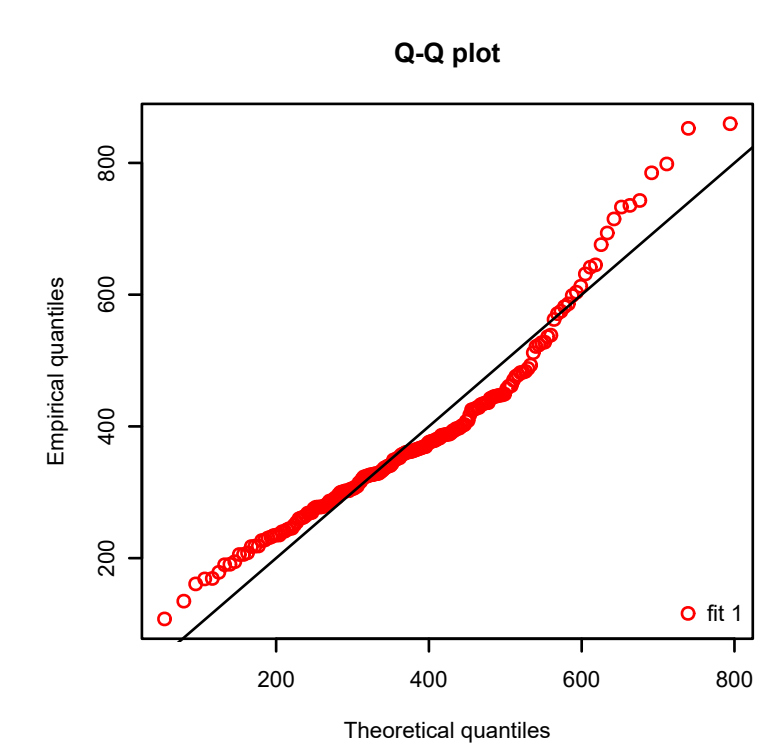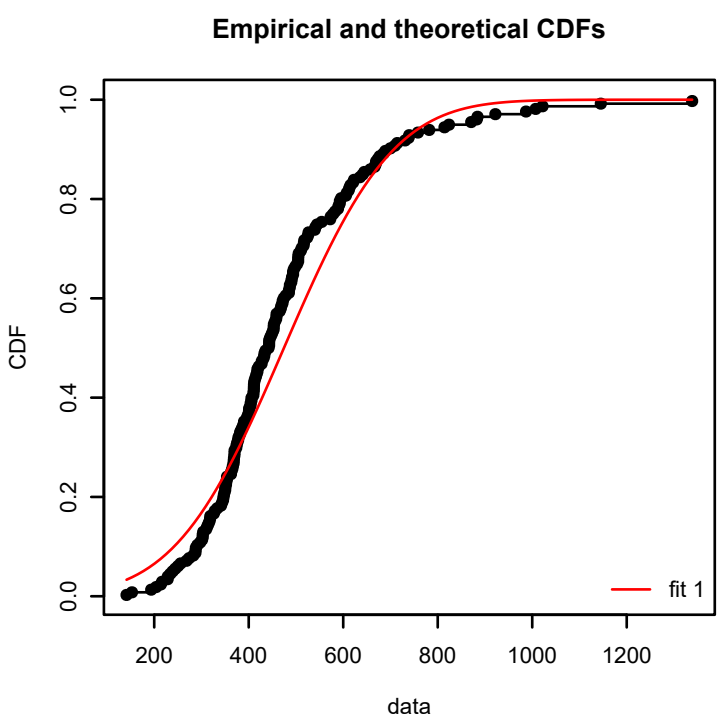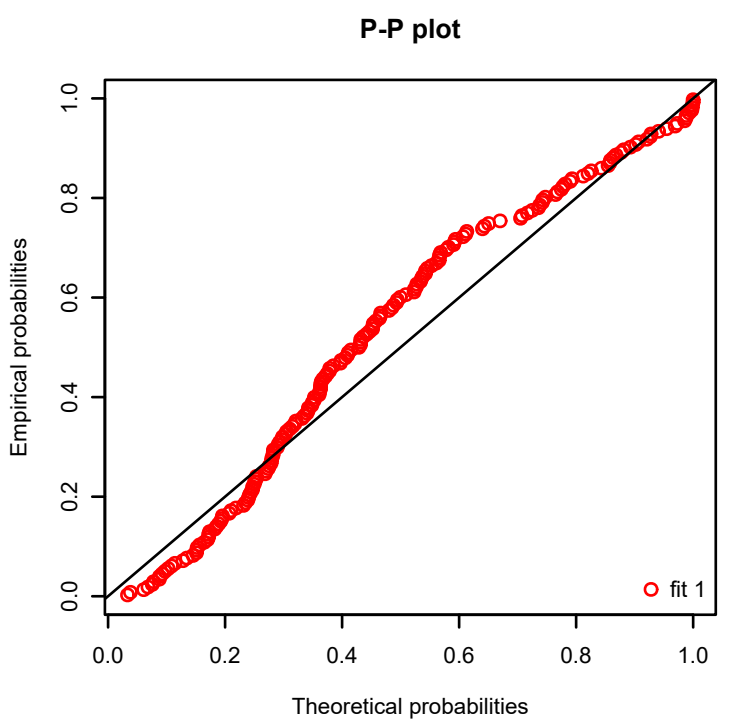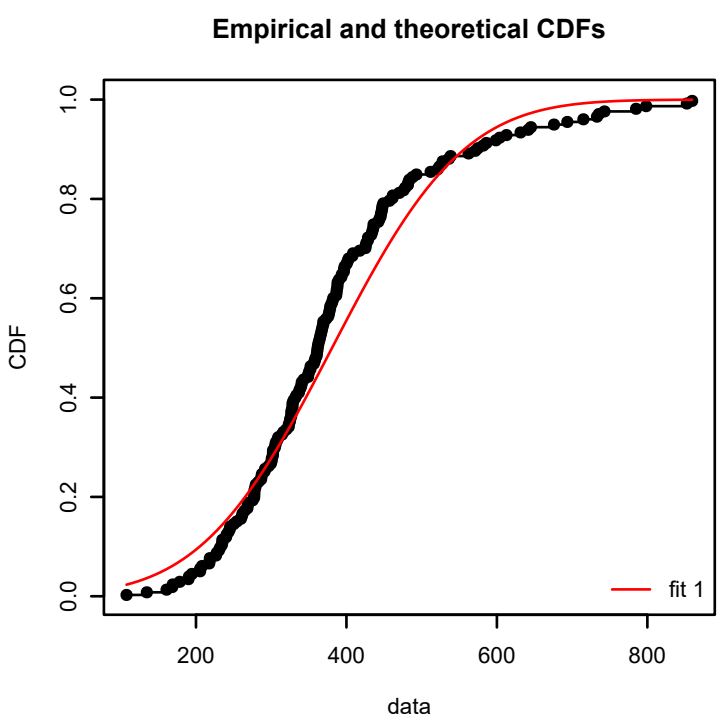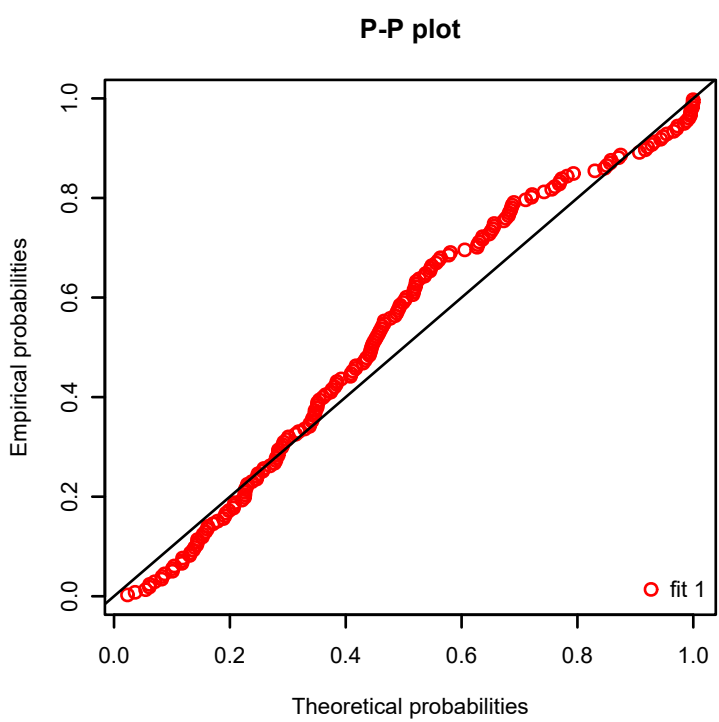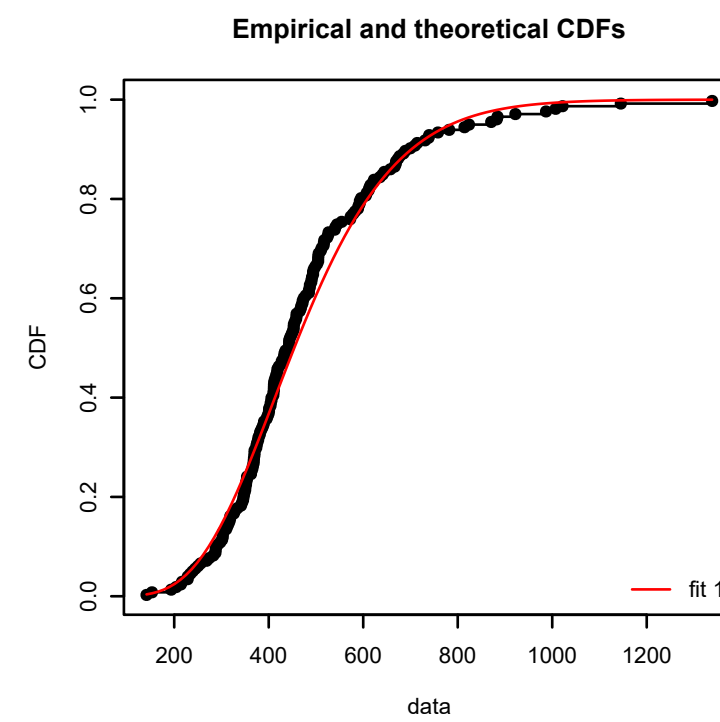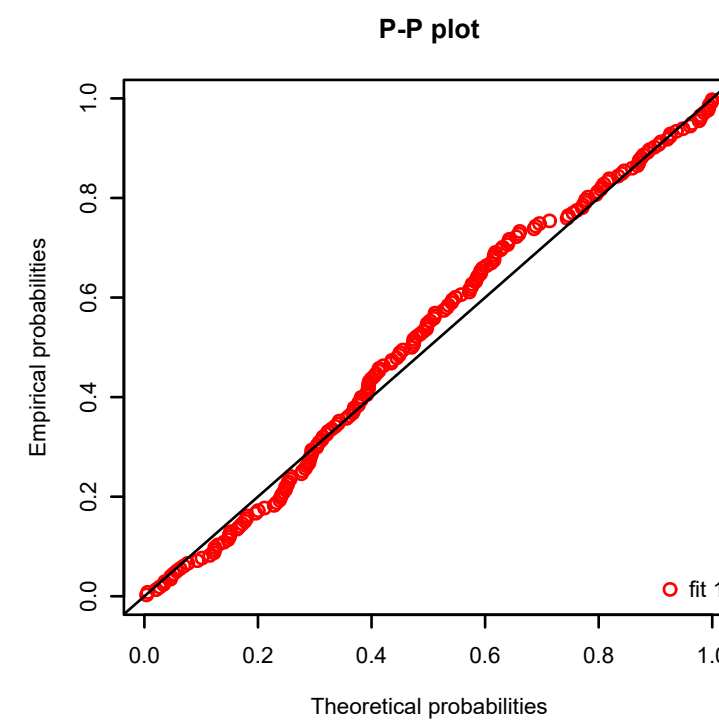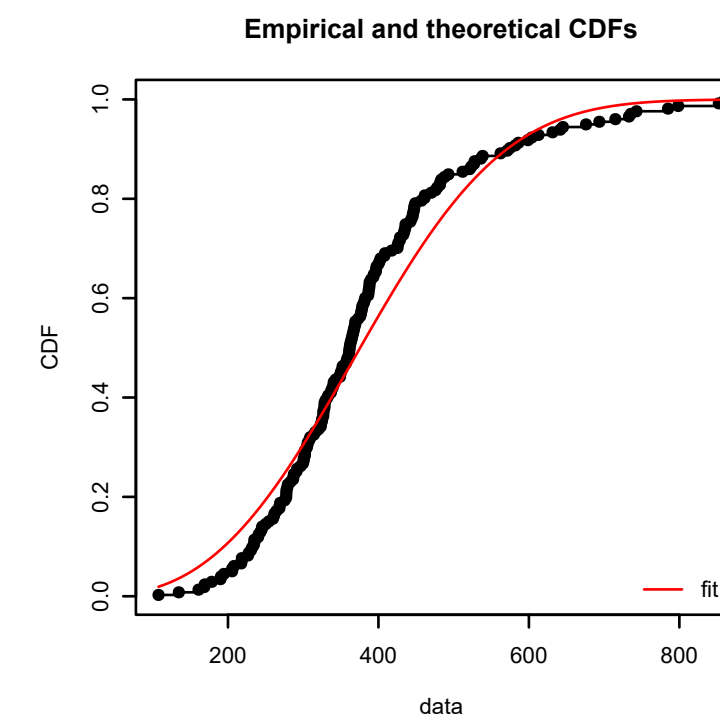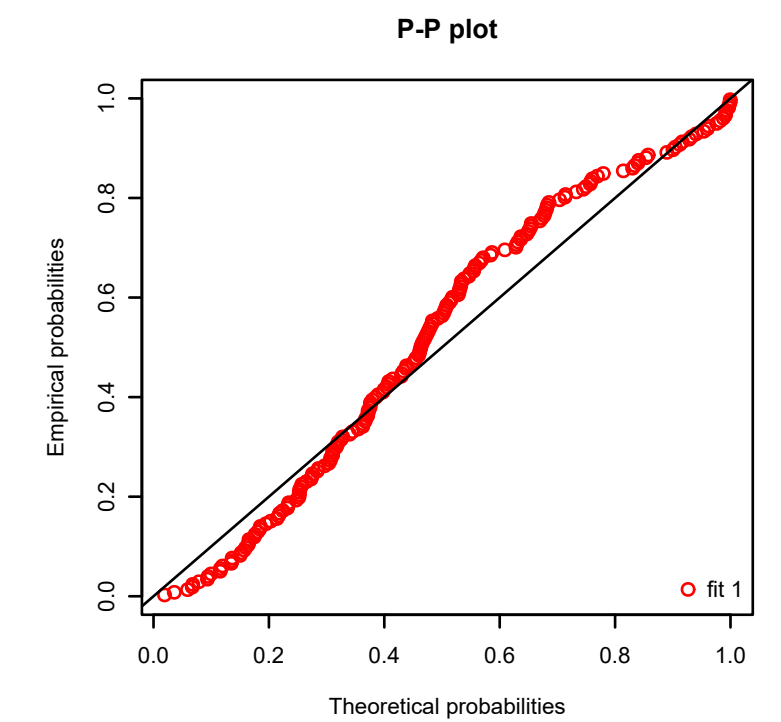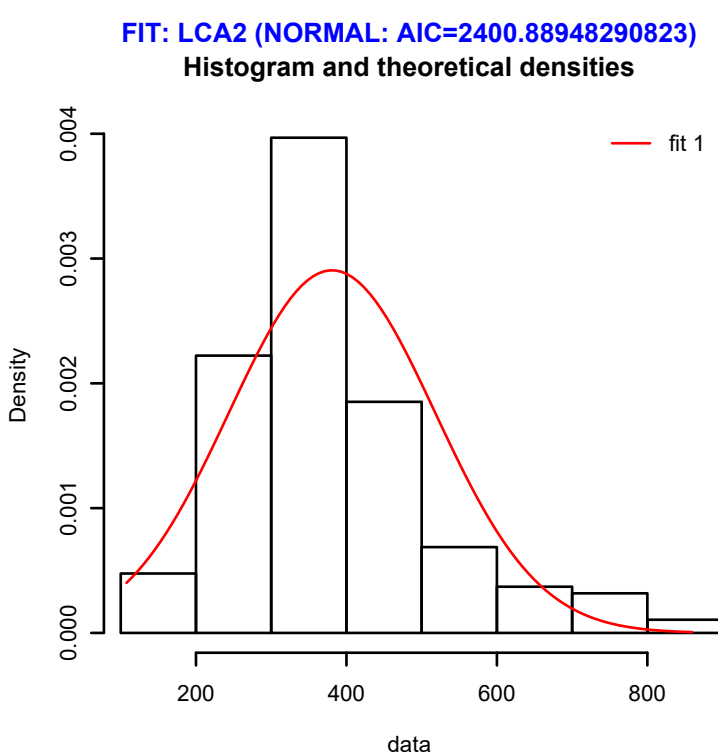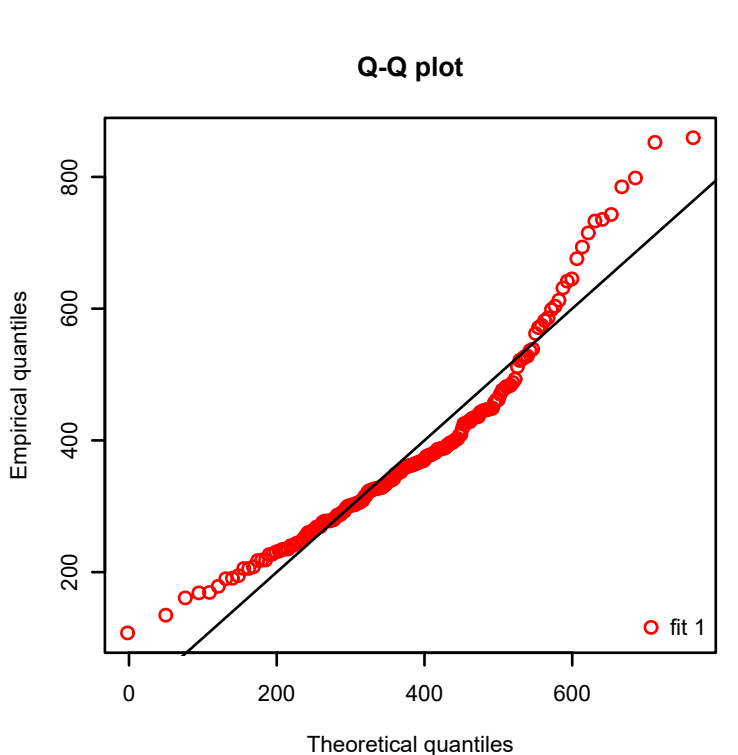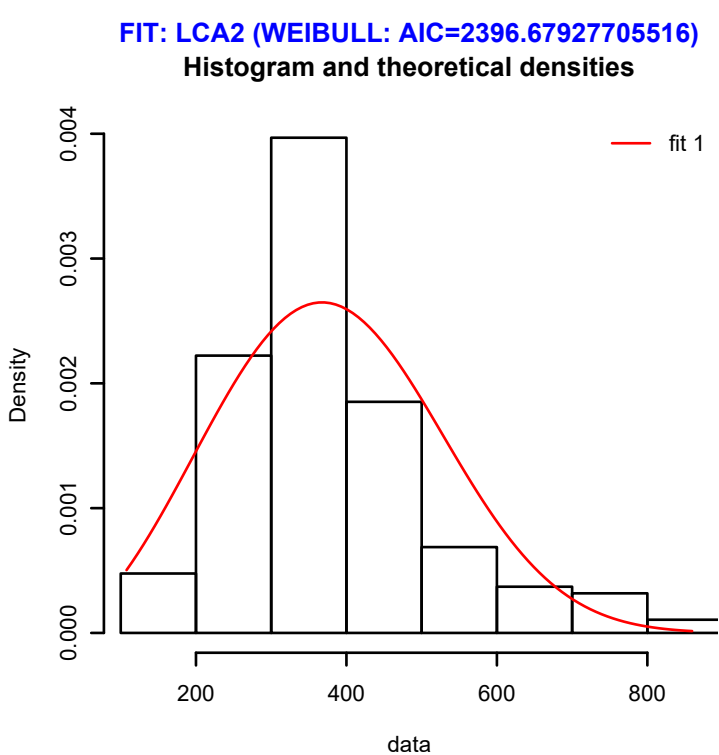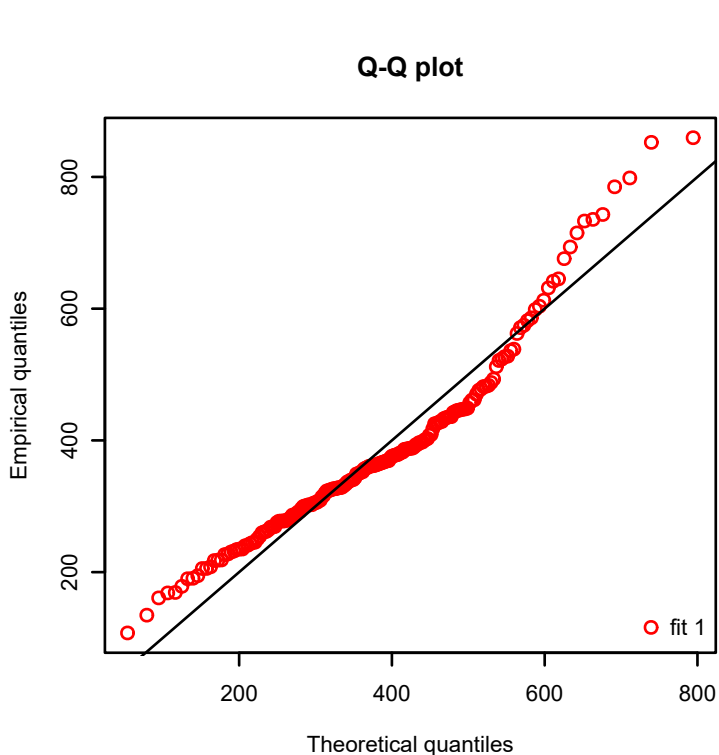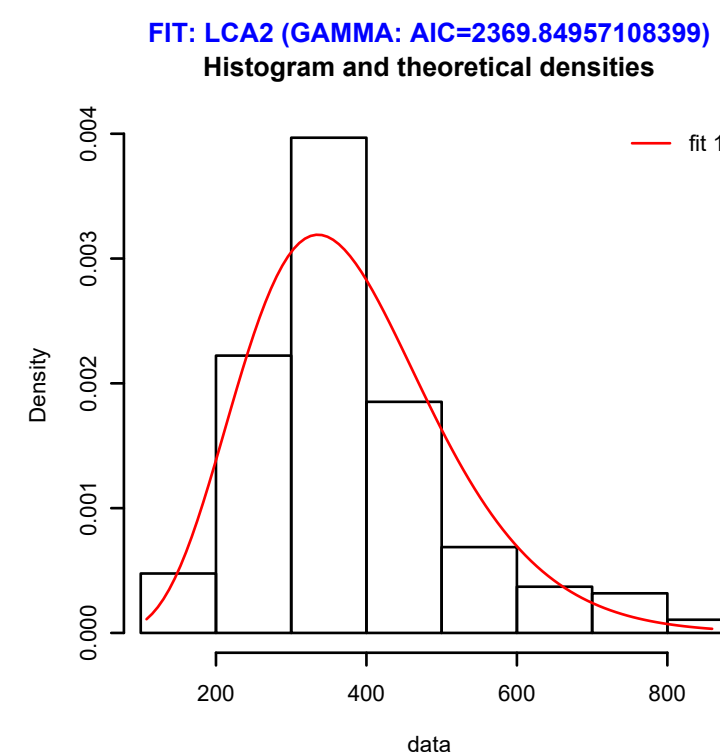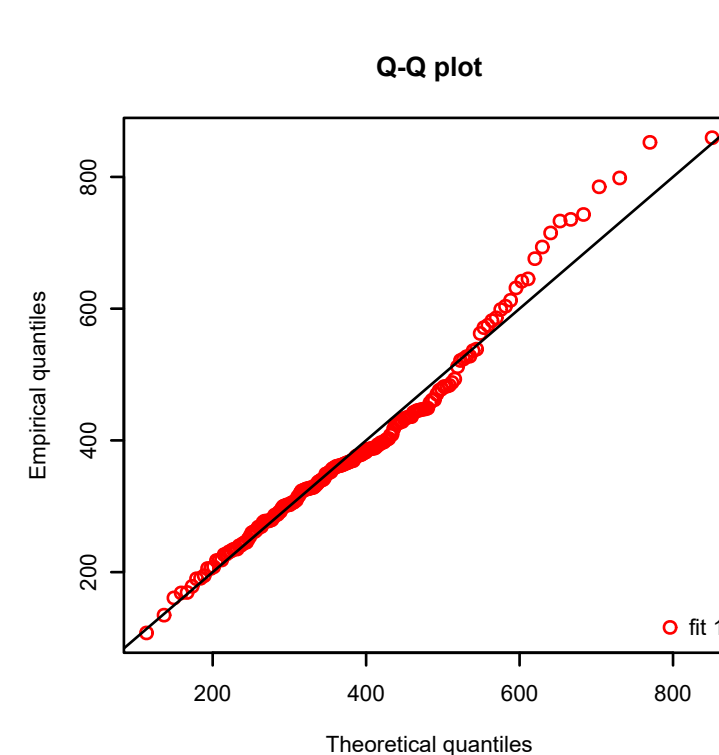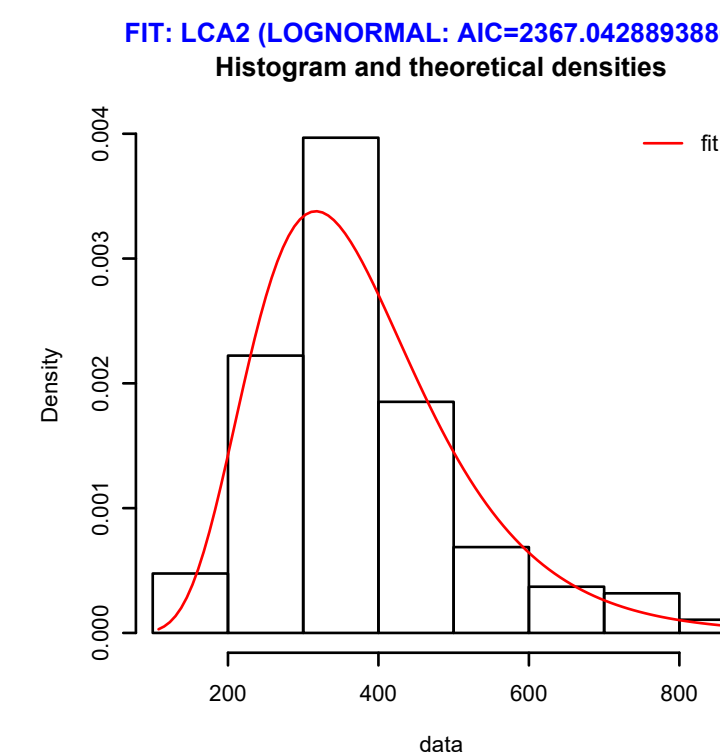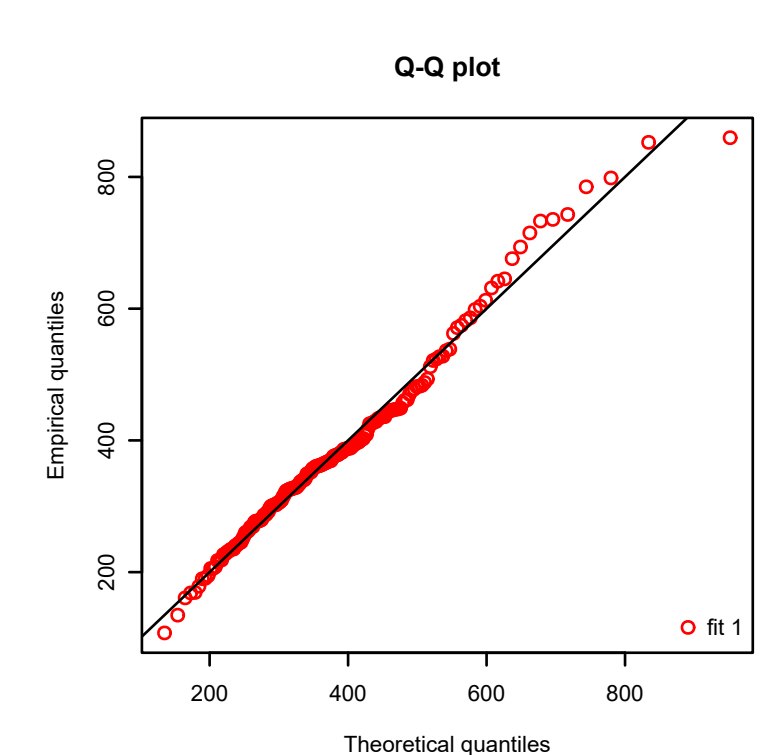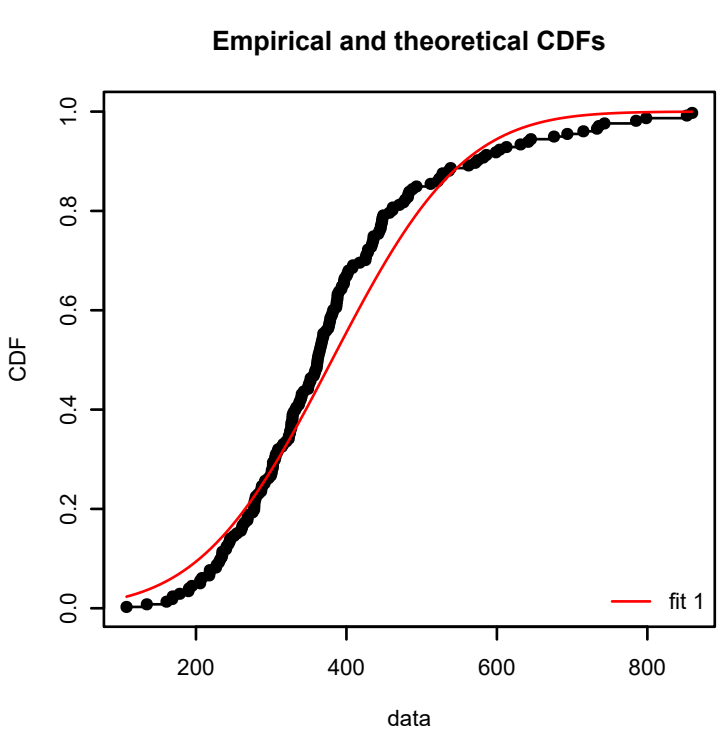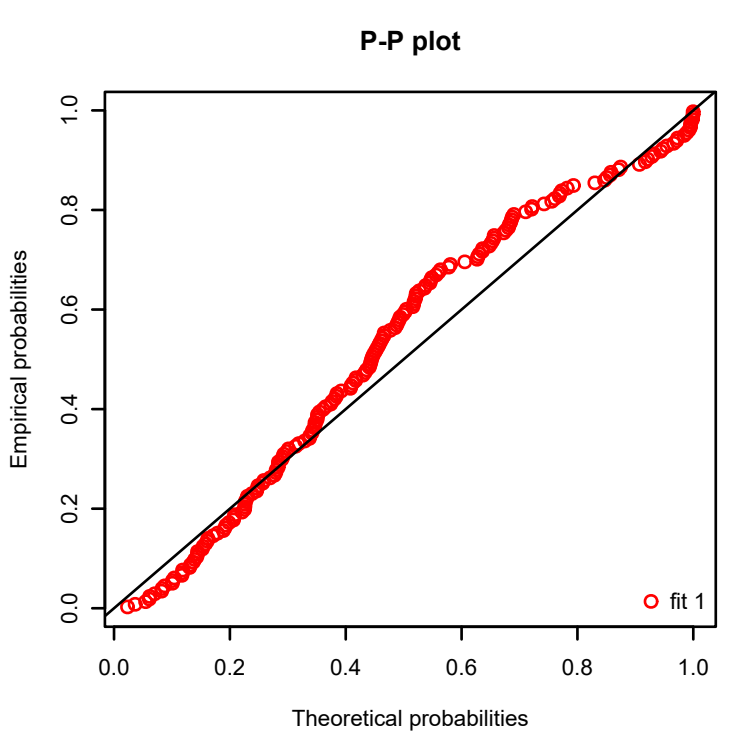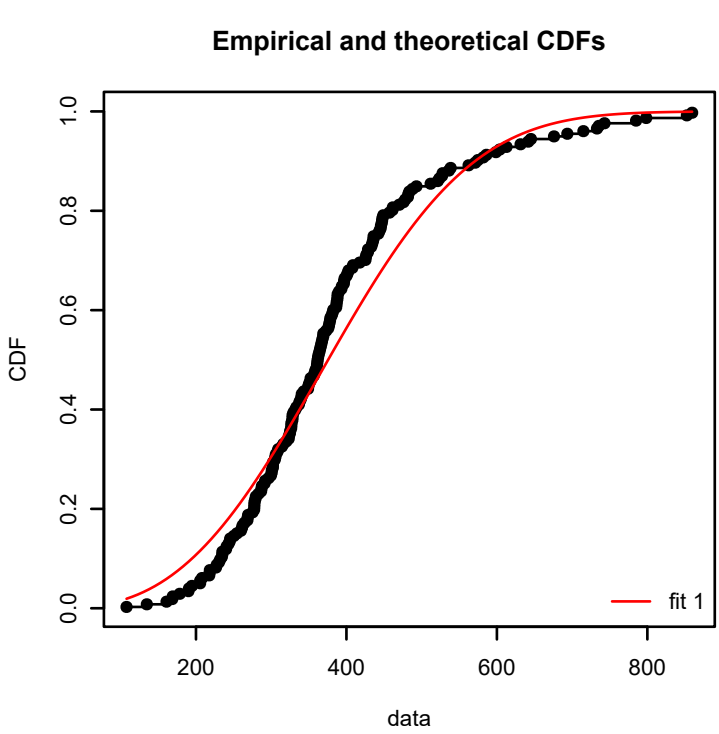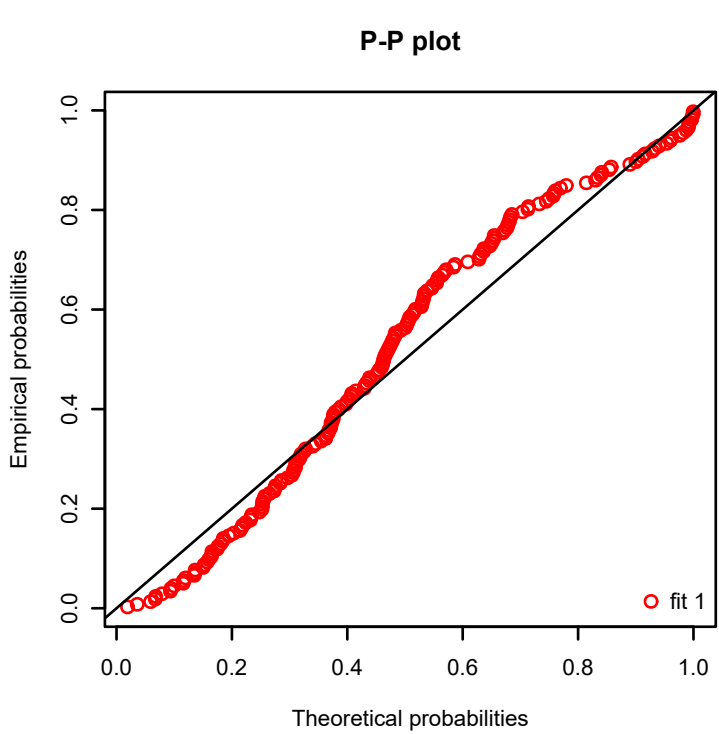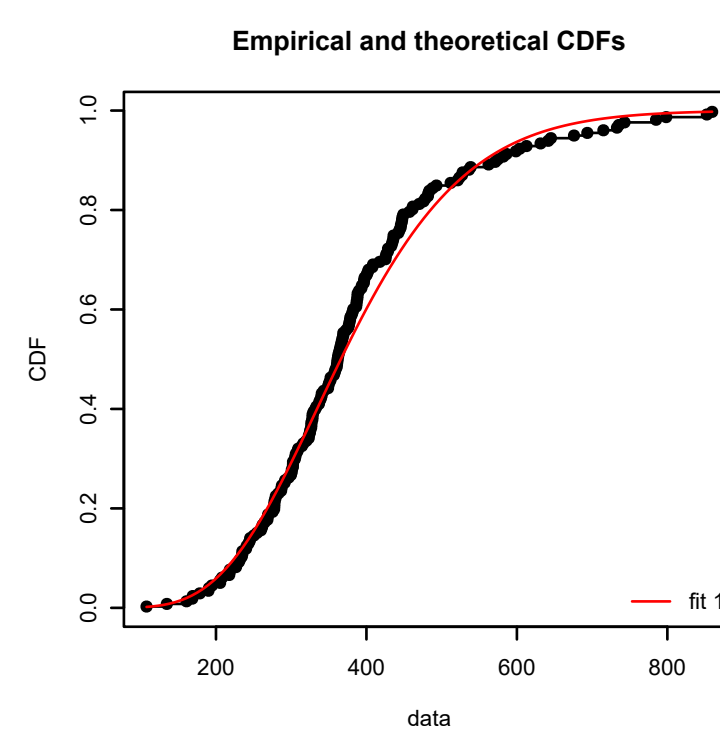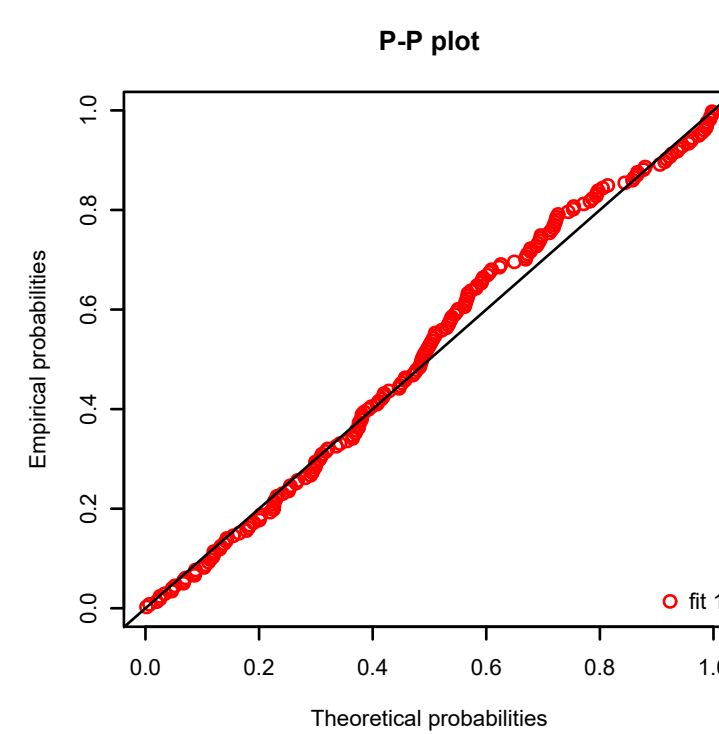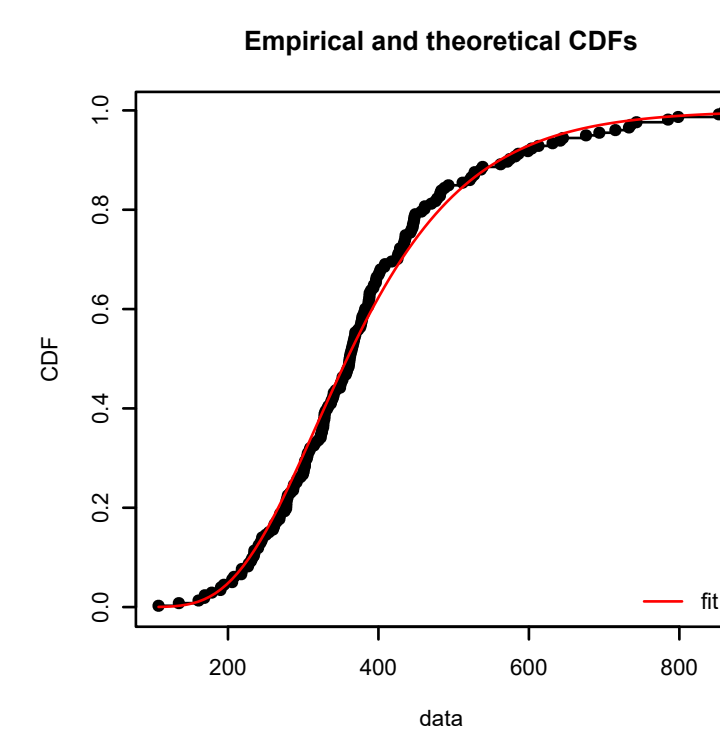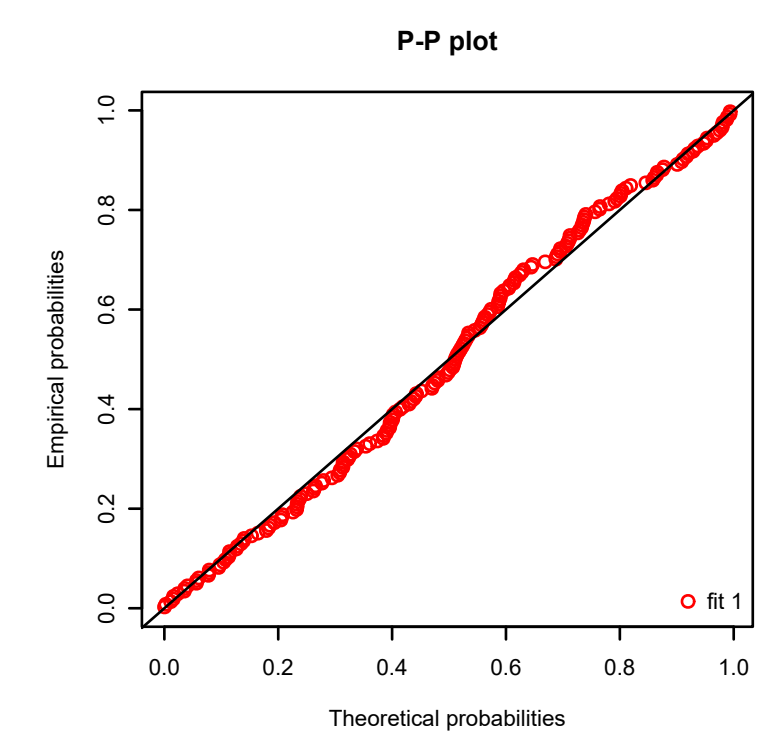

UPR: LCA1 (NORMAL: AIC=2608.42613664669)  
Histogram and theoretical densities

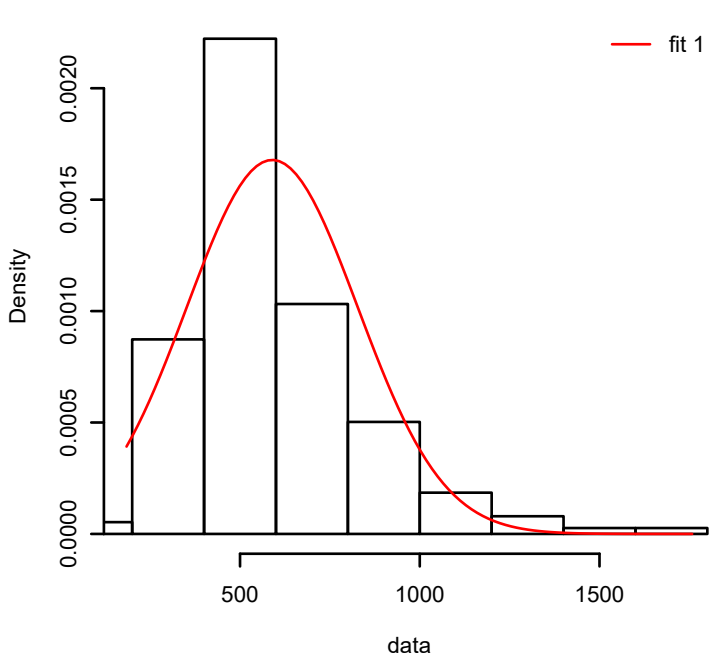

Q-Q plot

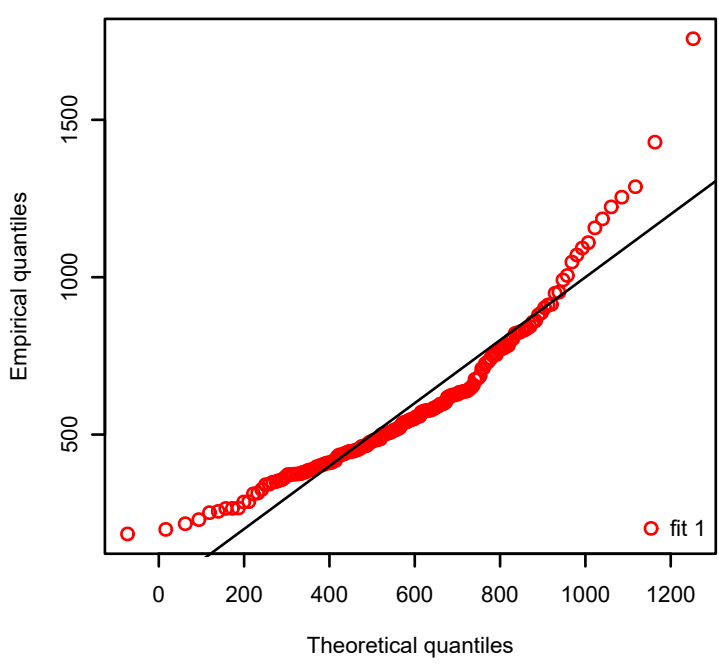

UPR: LCA1 (WEIBULL: AIC=2595.91995226002)  
Histogram and theoretical densities

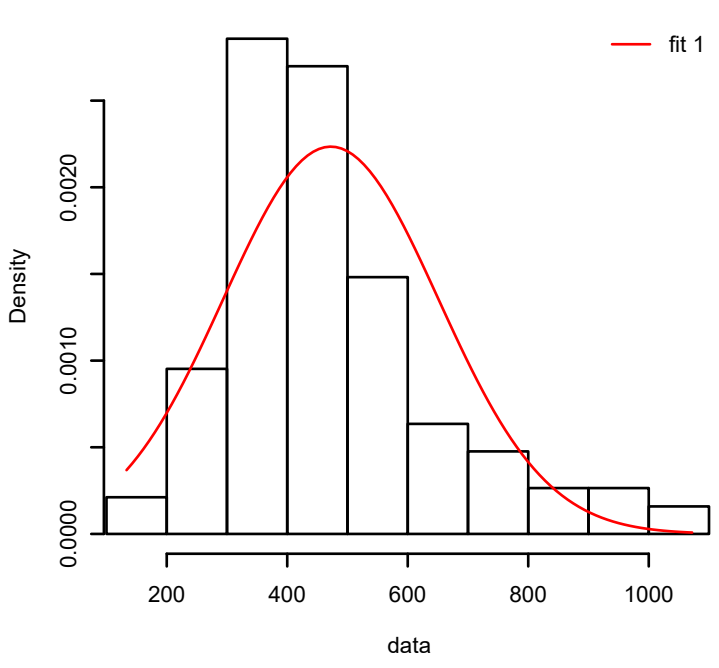

Q-Q plot

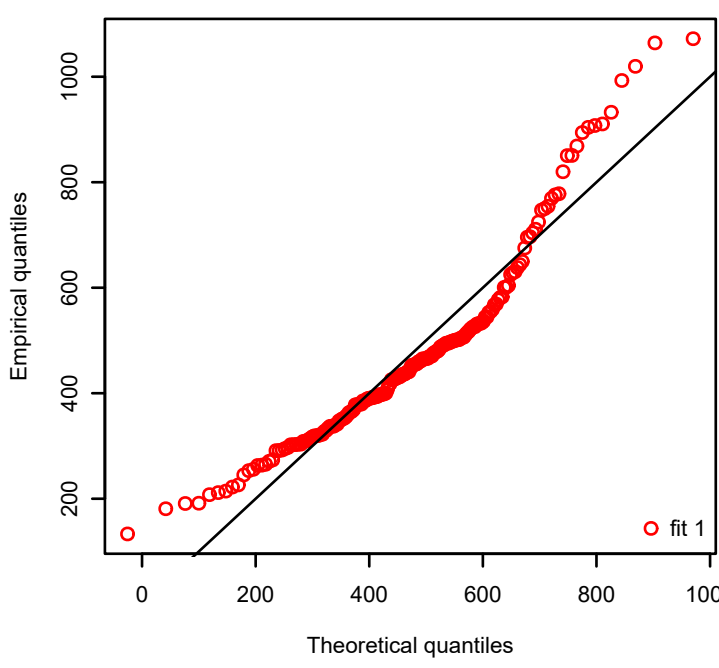

UPR: LCA1 (GAMMA: AIC=2564.97787096216)  
Histogram and theoretical densities

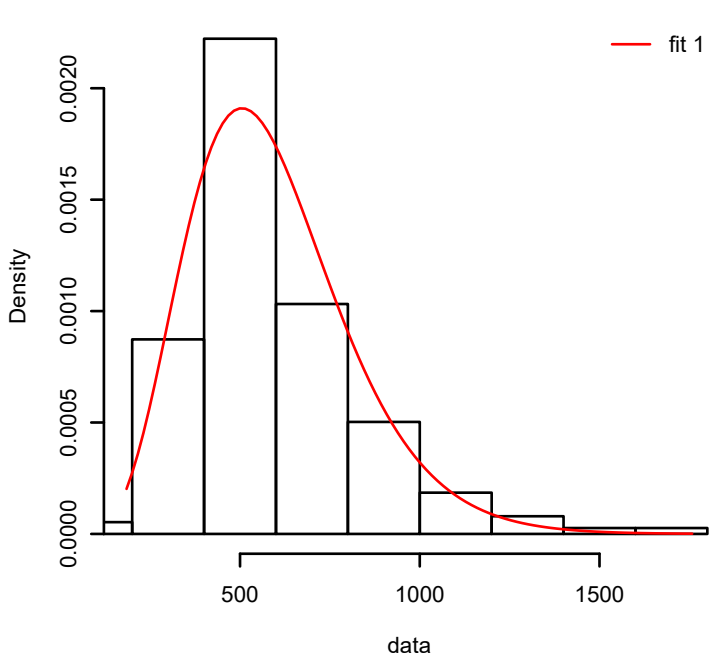

Q-Q plot

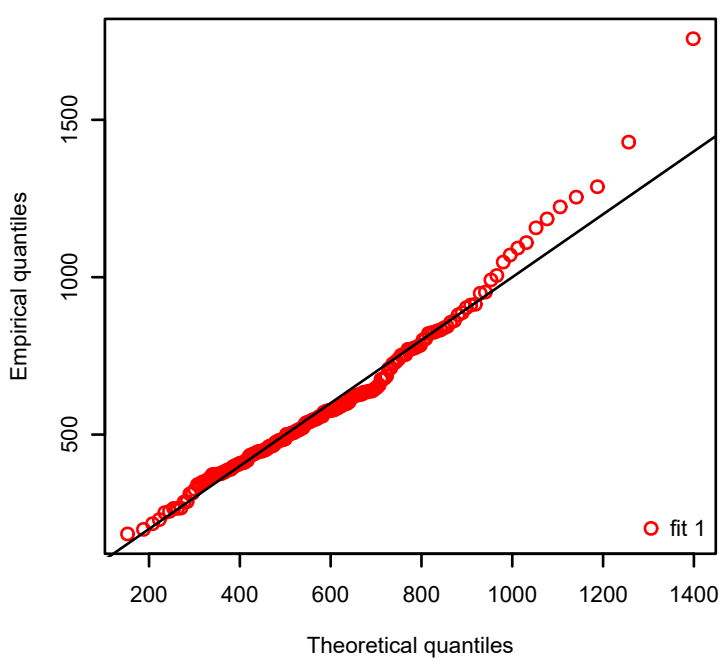

UPR: LCA1 (LOGNORMAL: AIC=2558.5444889517)  
Histogram and theoretical densities

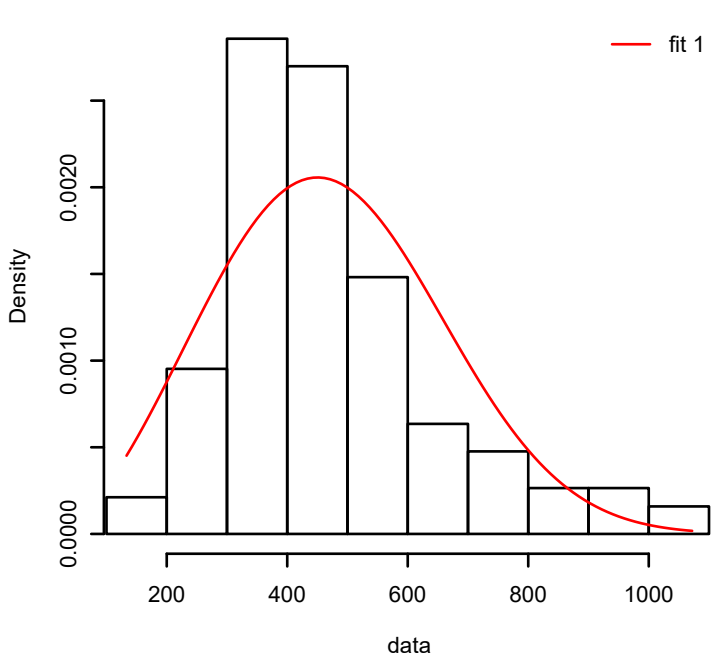

Q-Q plot

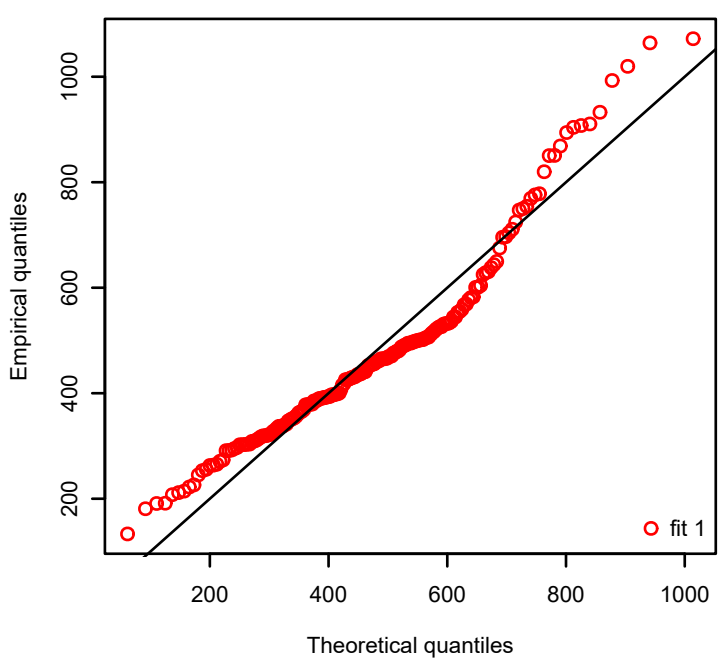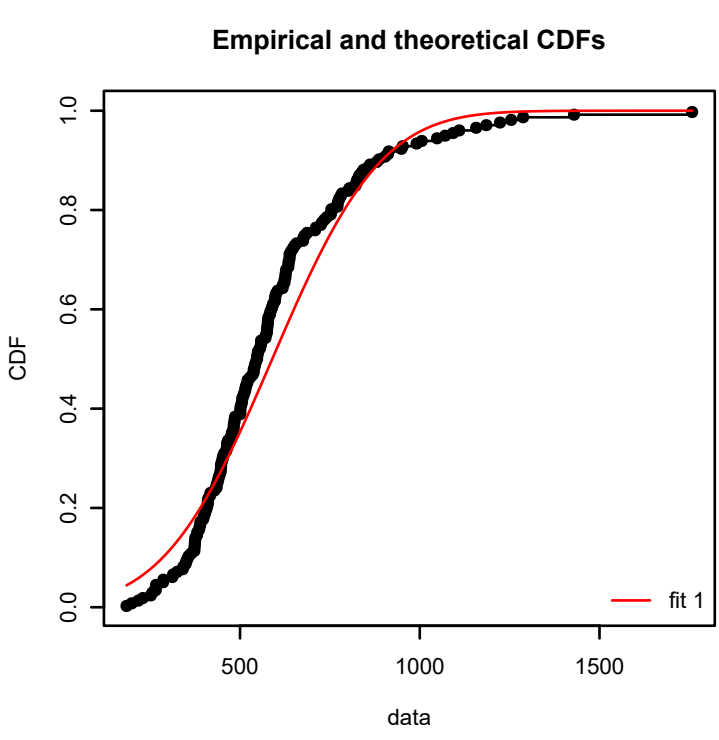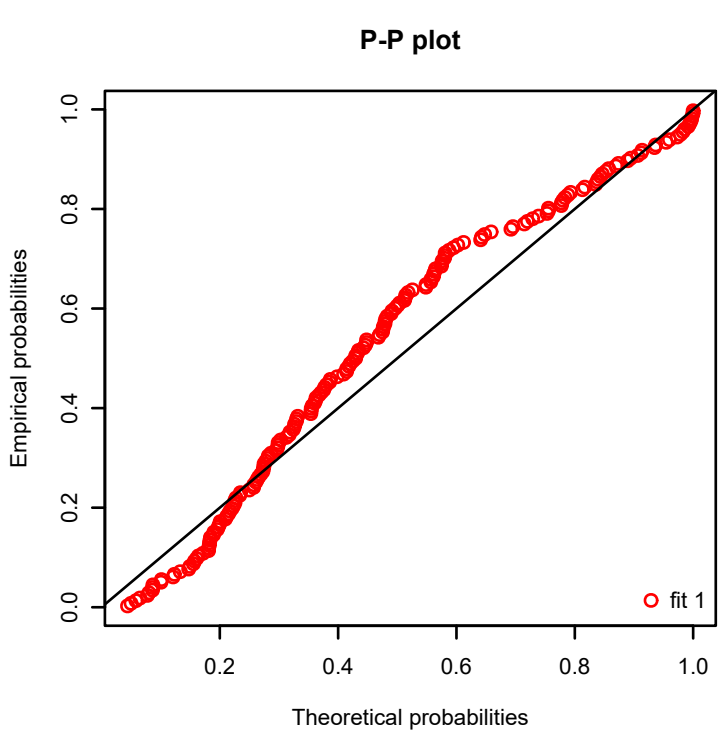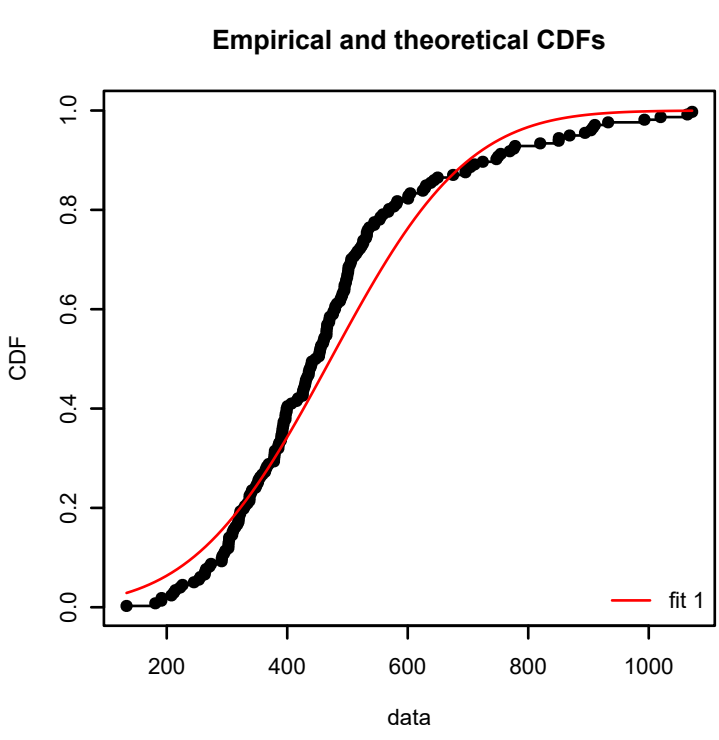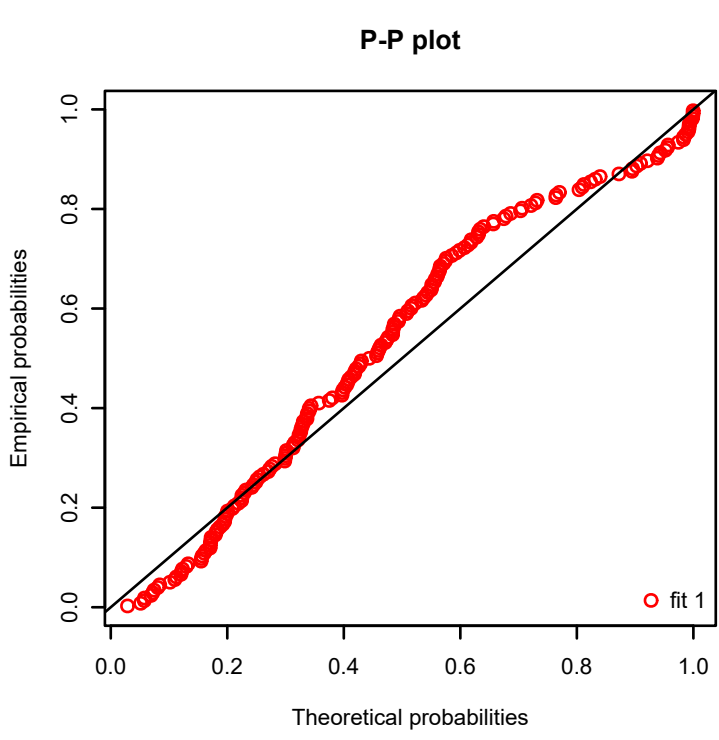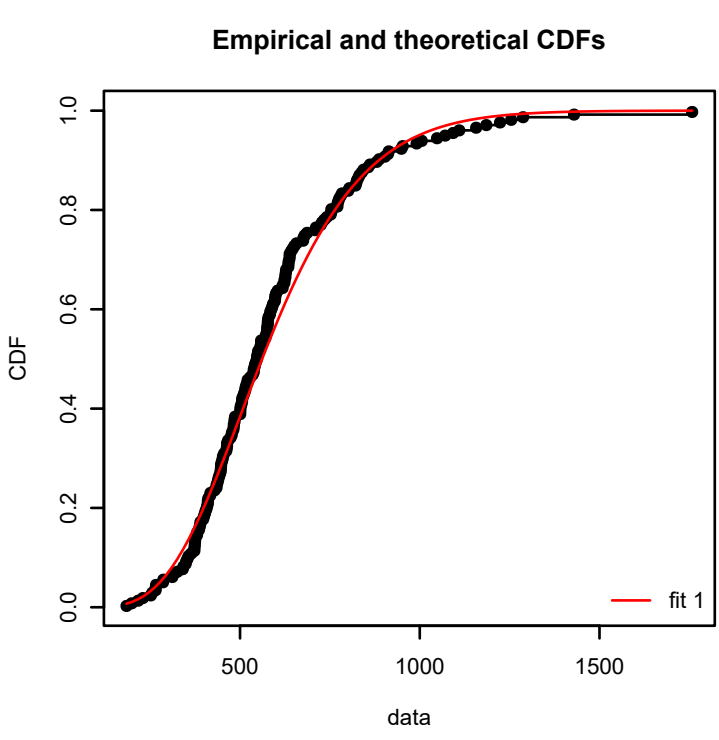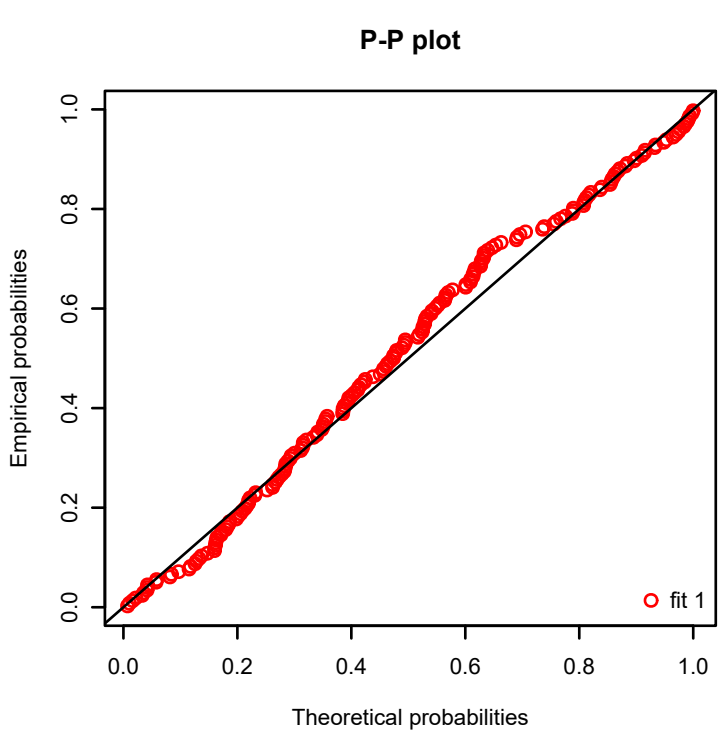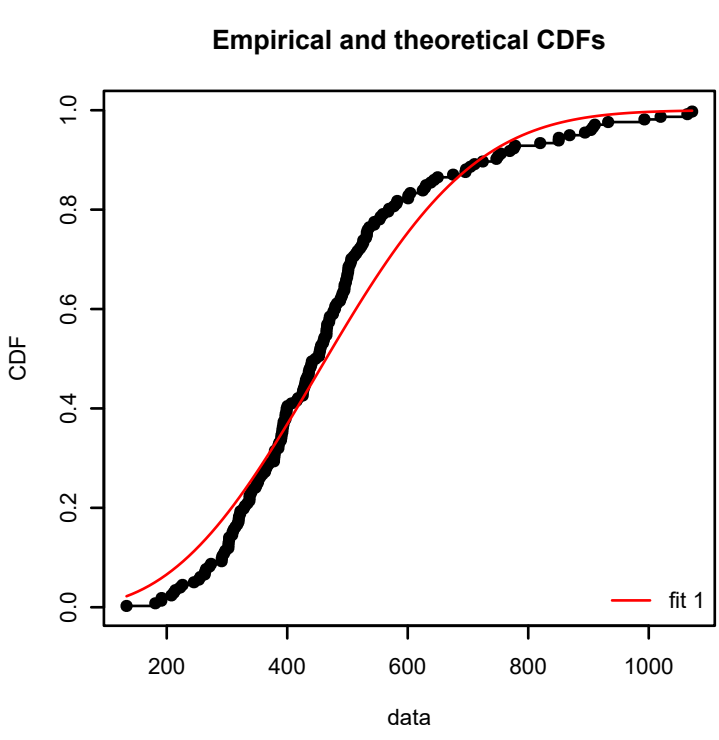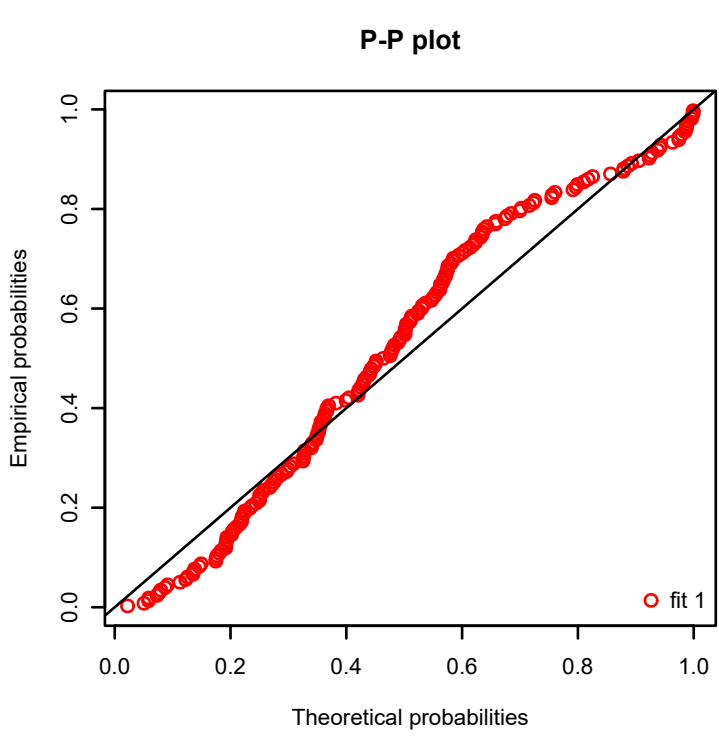

UPR: LCA2 (NORMAL: AIC=2500.19824606406)  
Histogram and theoretical densities

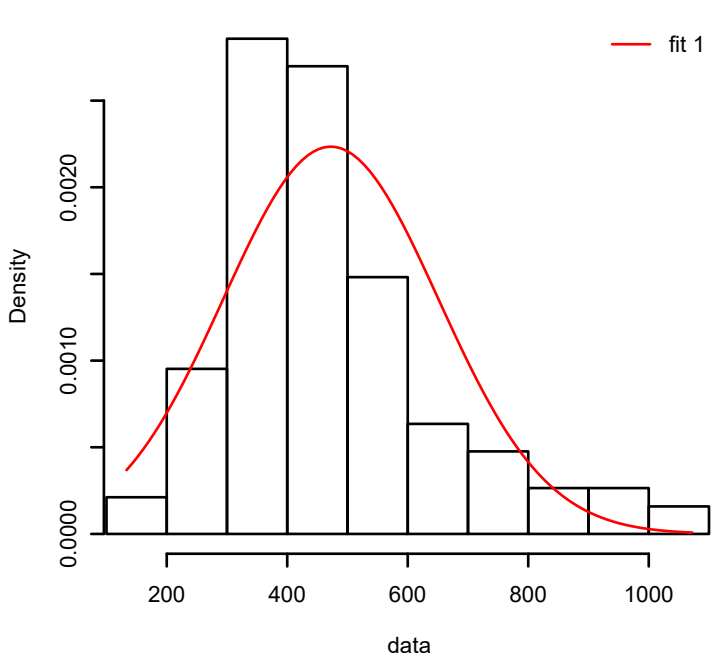

Q-Q plot

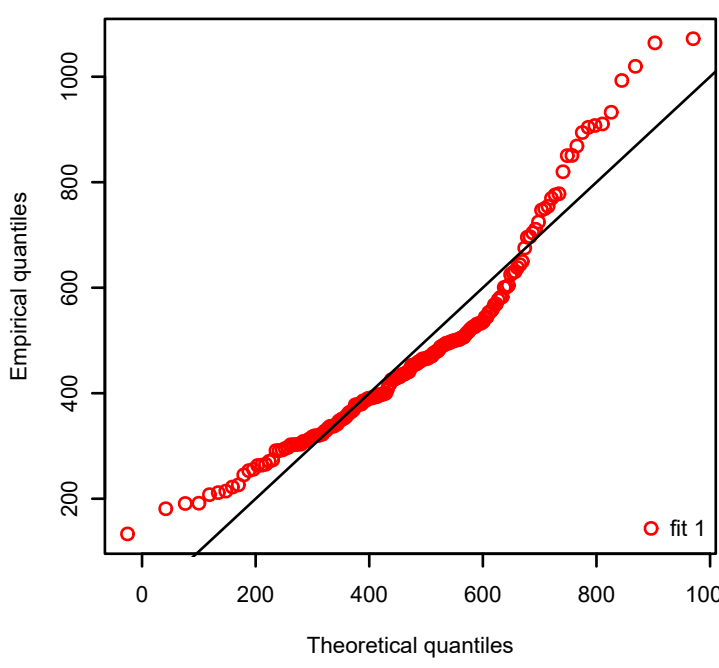

UPR: LCA2 (WEIBULL: AIC=2492.3231635715)  
Histogram and theoretical densities

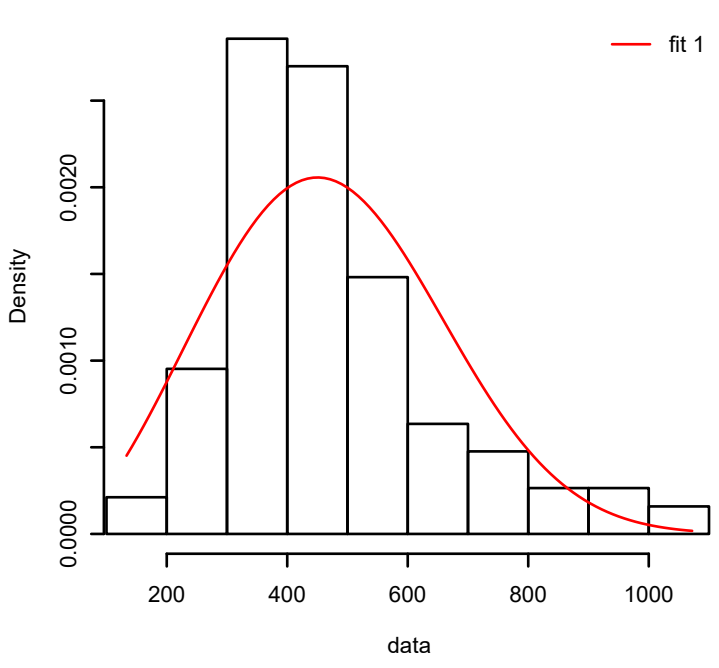

Q-Q plot

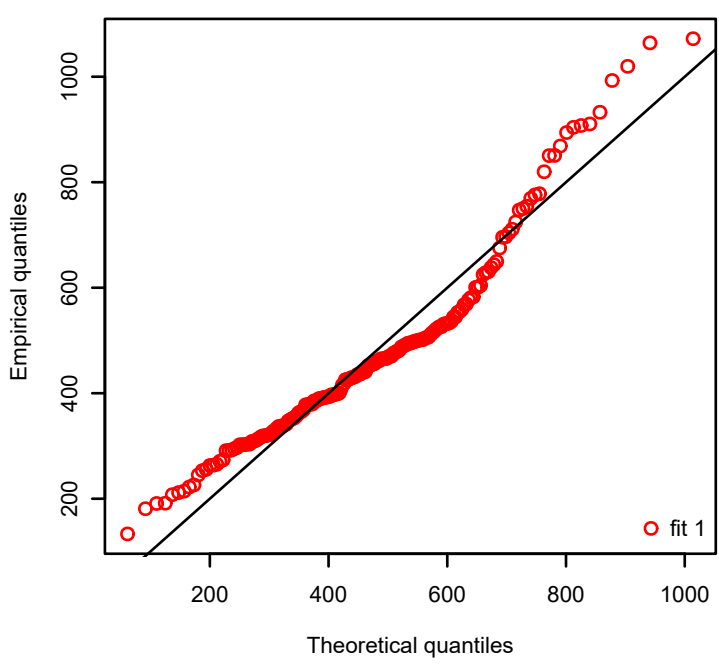

UPR: LCA2 (GAMMA: AIC=2465.74548695874)  
Histogram and theoretical densities

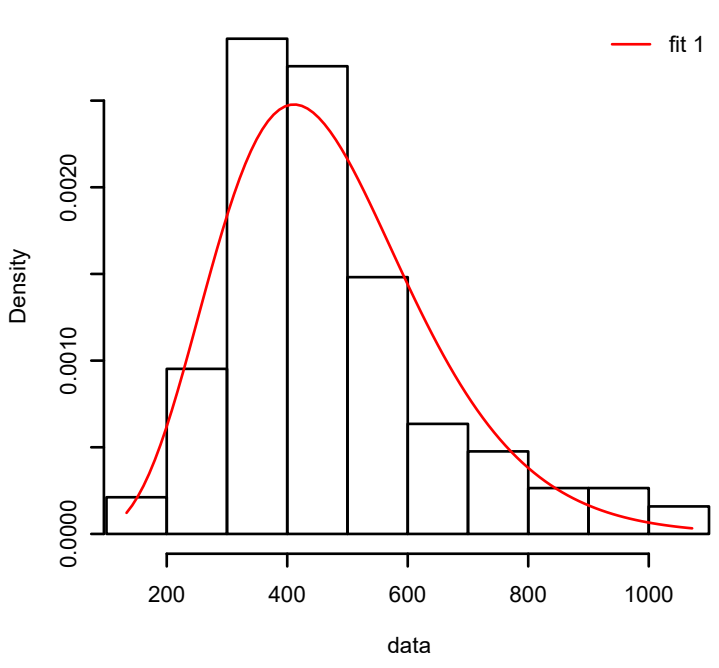

Q-Q plot

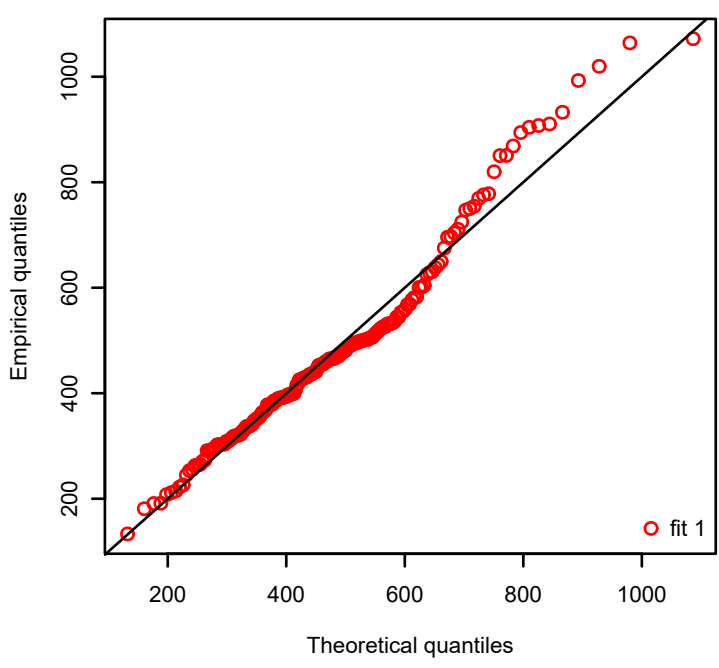

UPR: LCA2 (LOGNORMAL: AIC=2461.63510065752)  
Histogram and theoretical densities

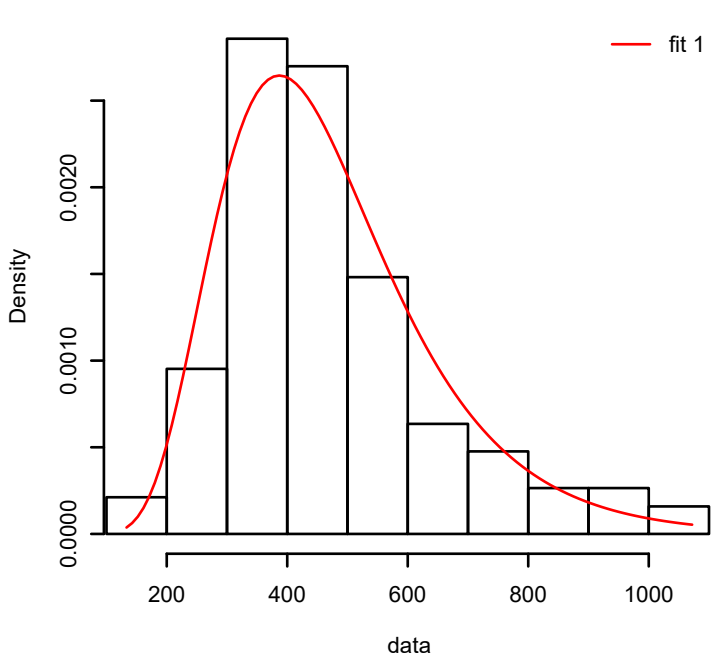

Q-Q plot

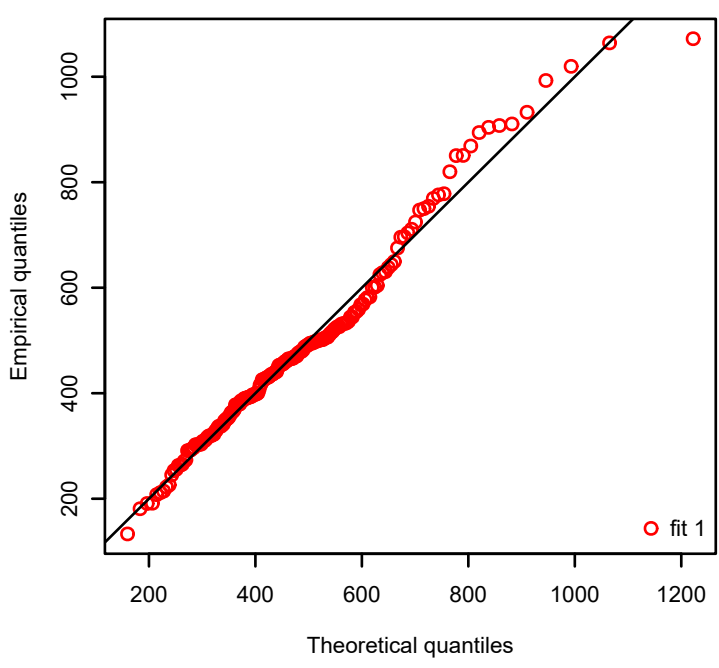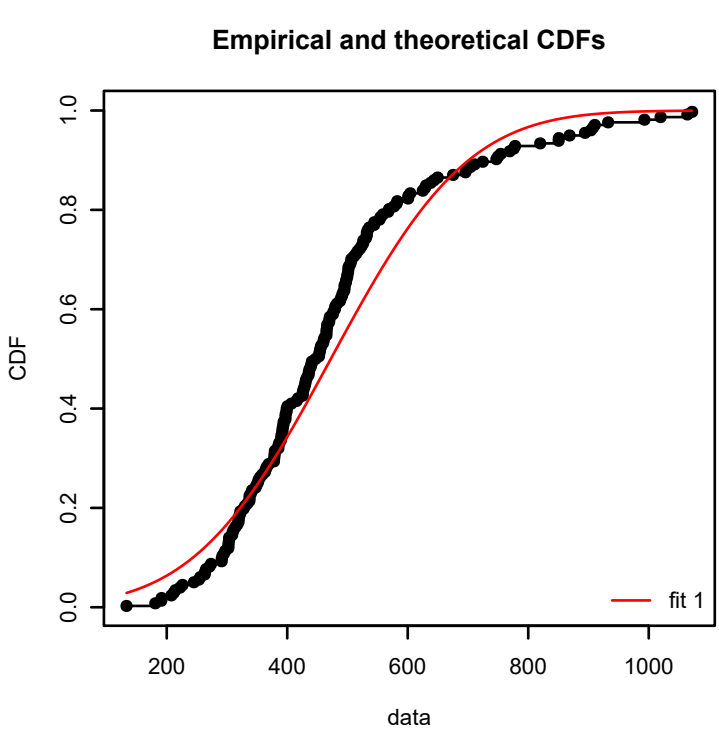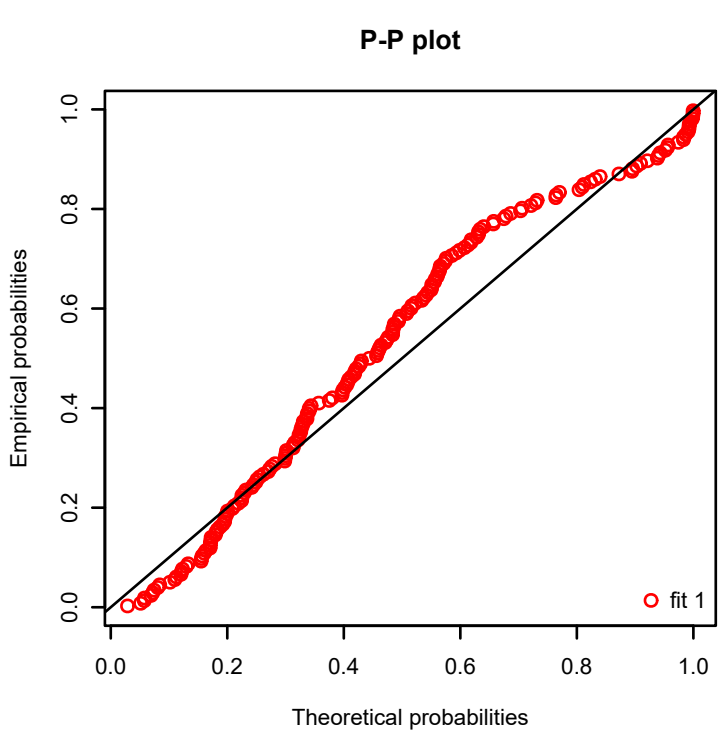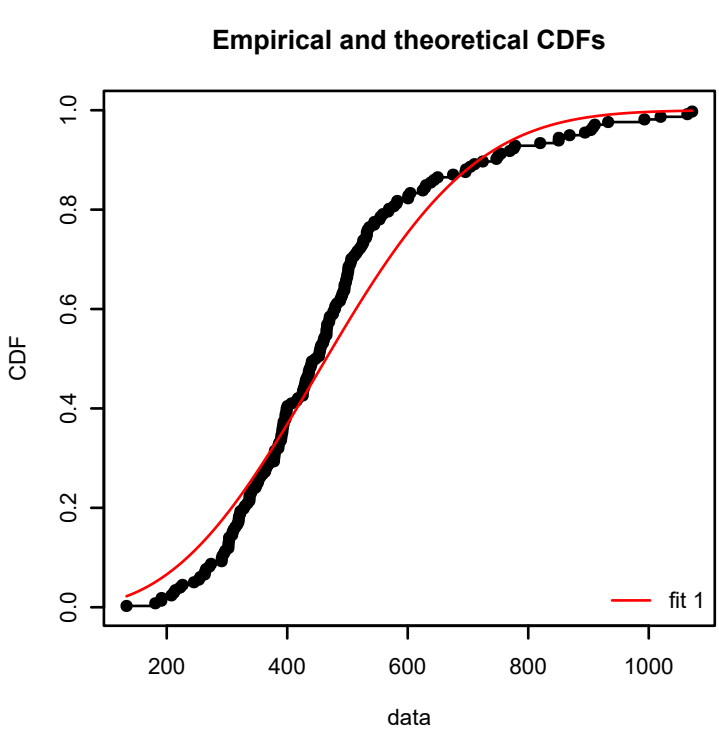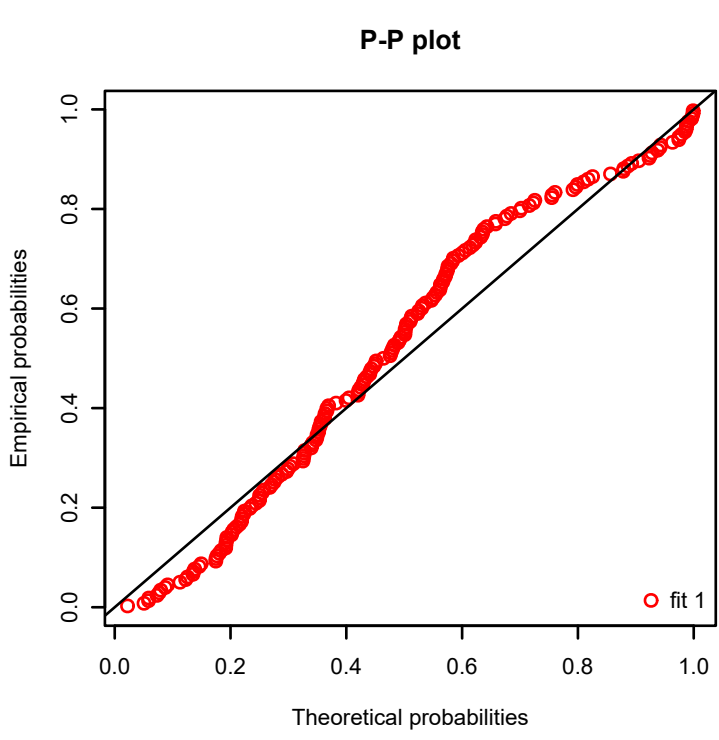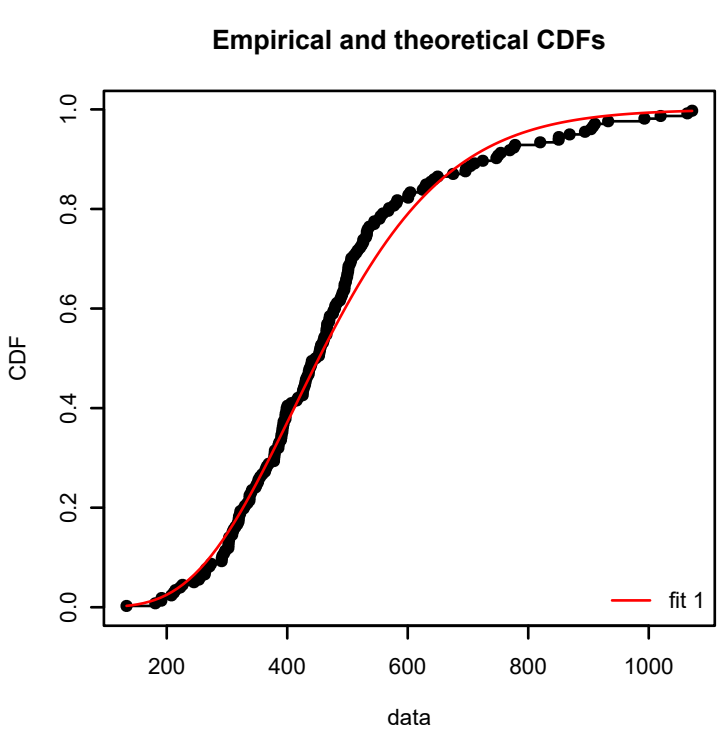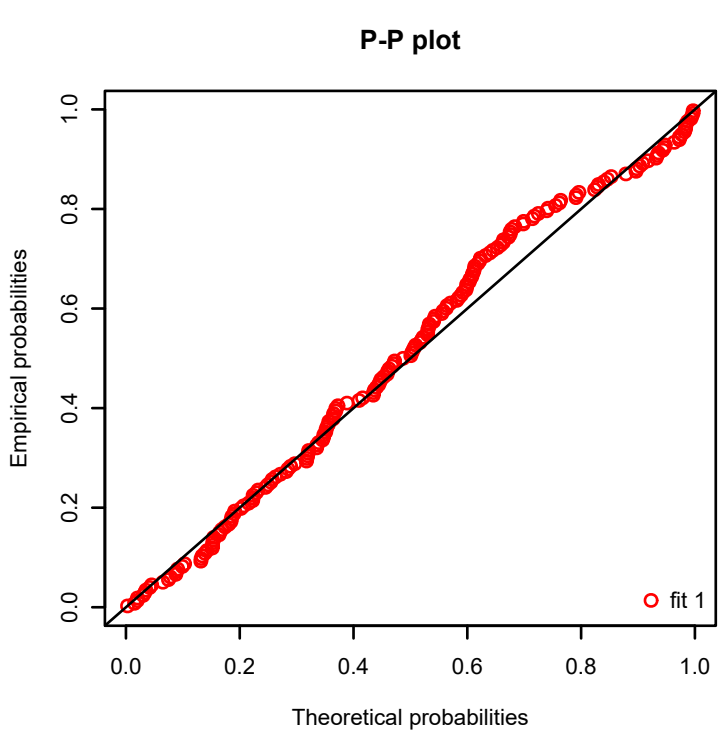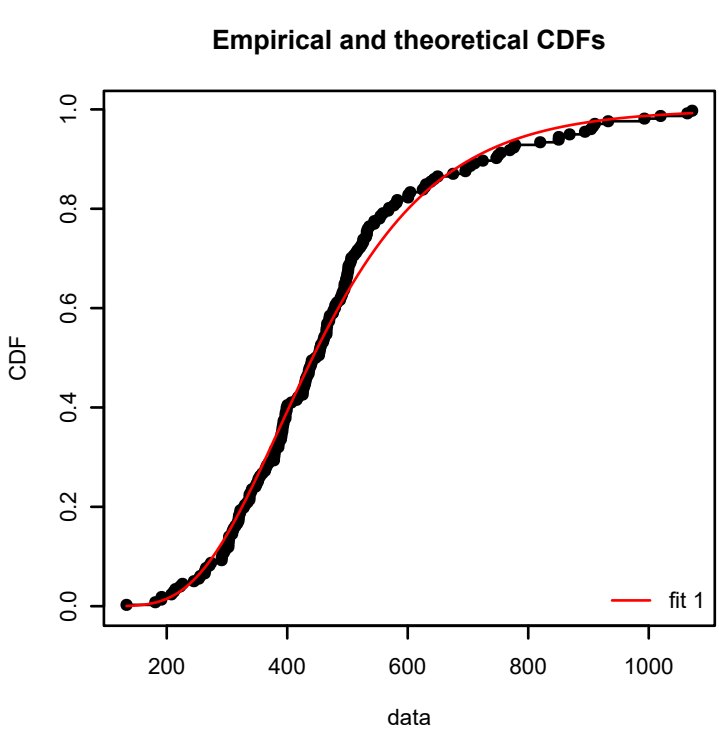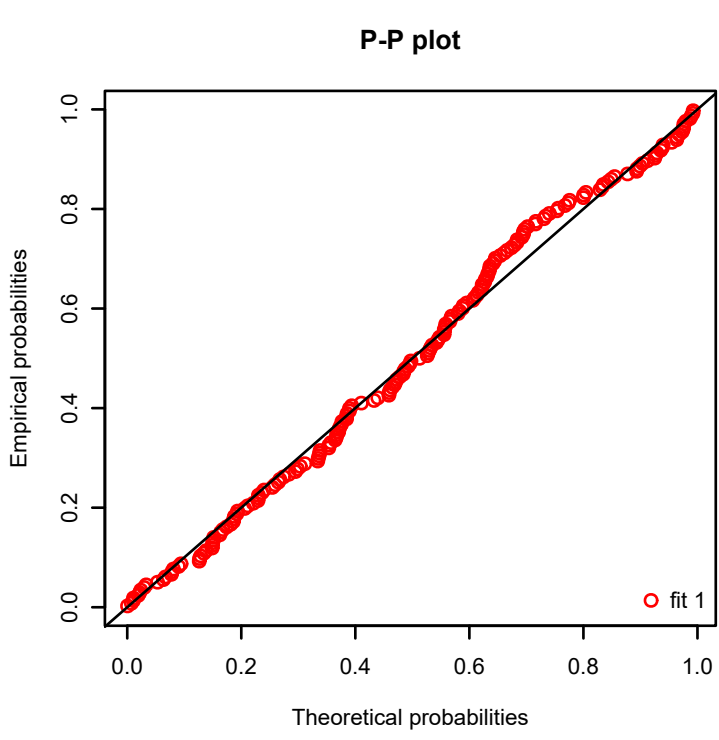

Supplement: ismej201720x5.pdf [file ismej201720x5.pdf]
