# Supplementary material
Source: PubMed Central journal article supplement (PMC5584476)

Fig. S1

(A)

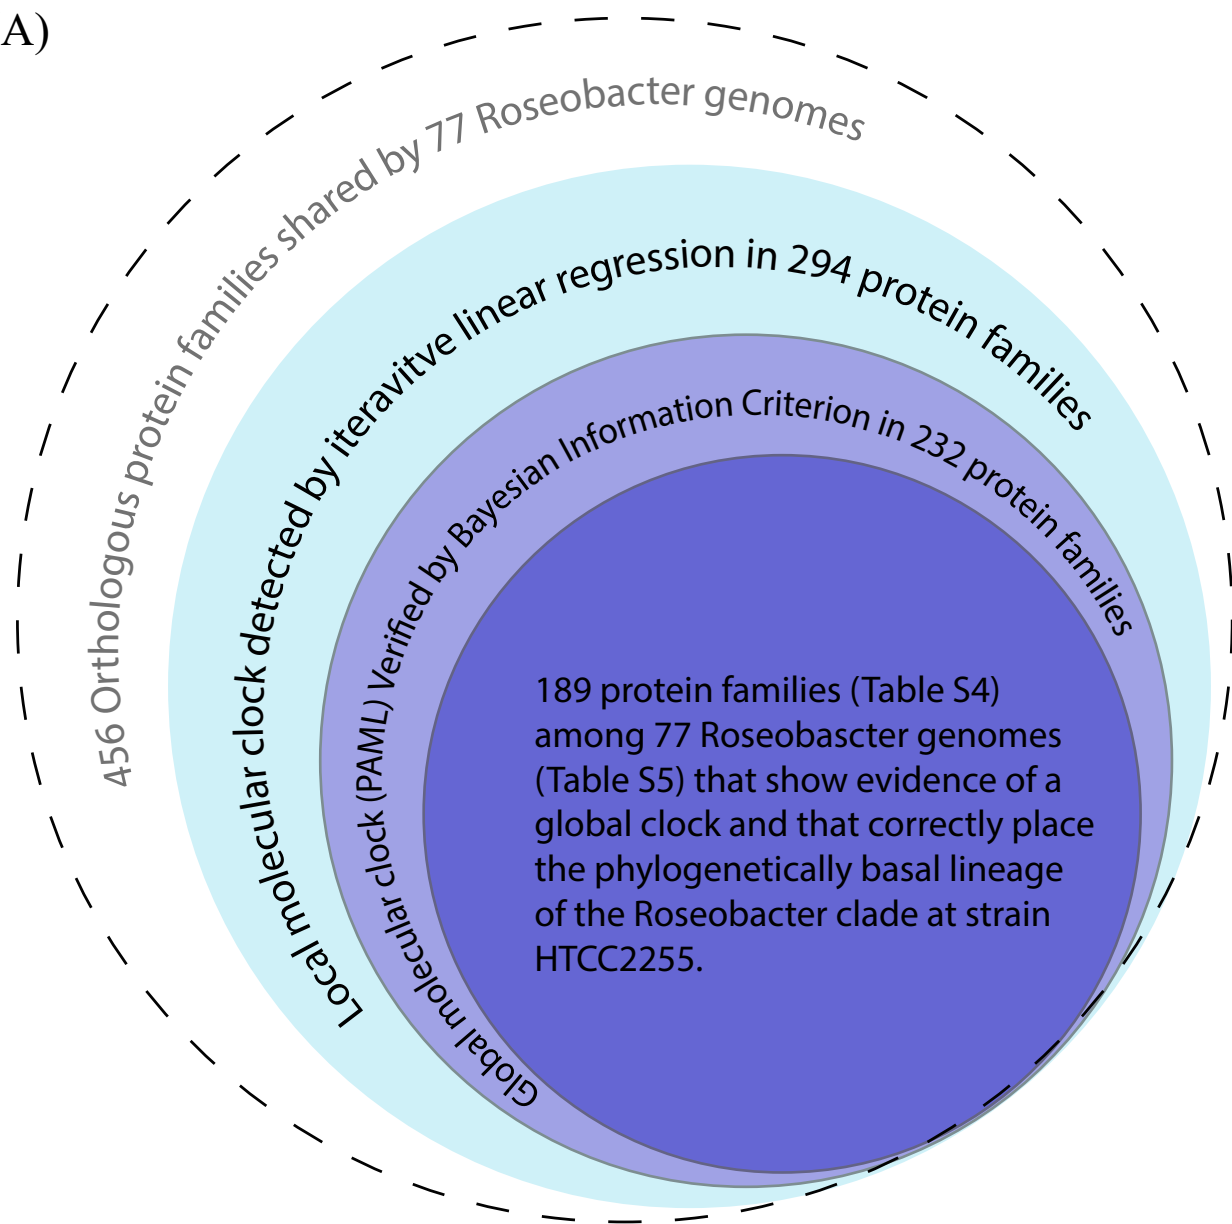

(B)

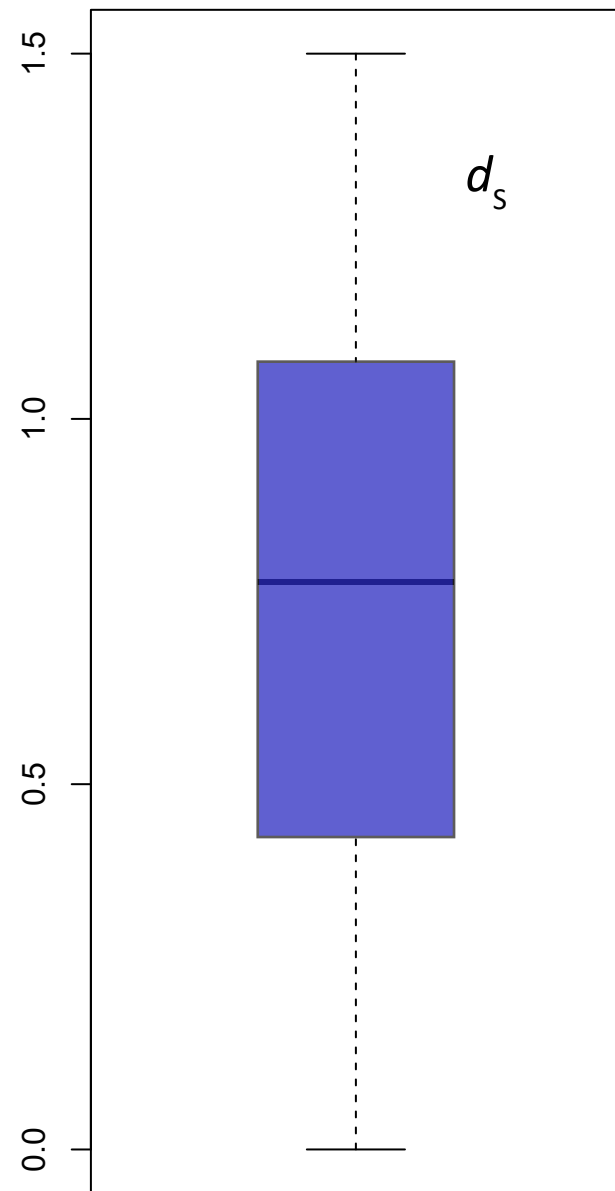

Supplement: ismej201720x2.pdf [file ismej201720x2.pdf]

Fig. S3

(A) SPO3237 (COG5336)

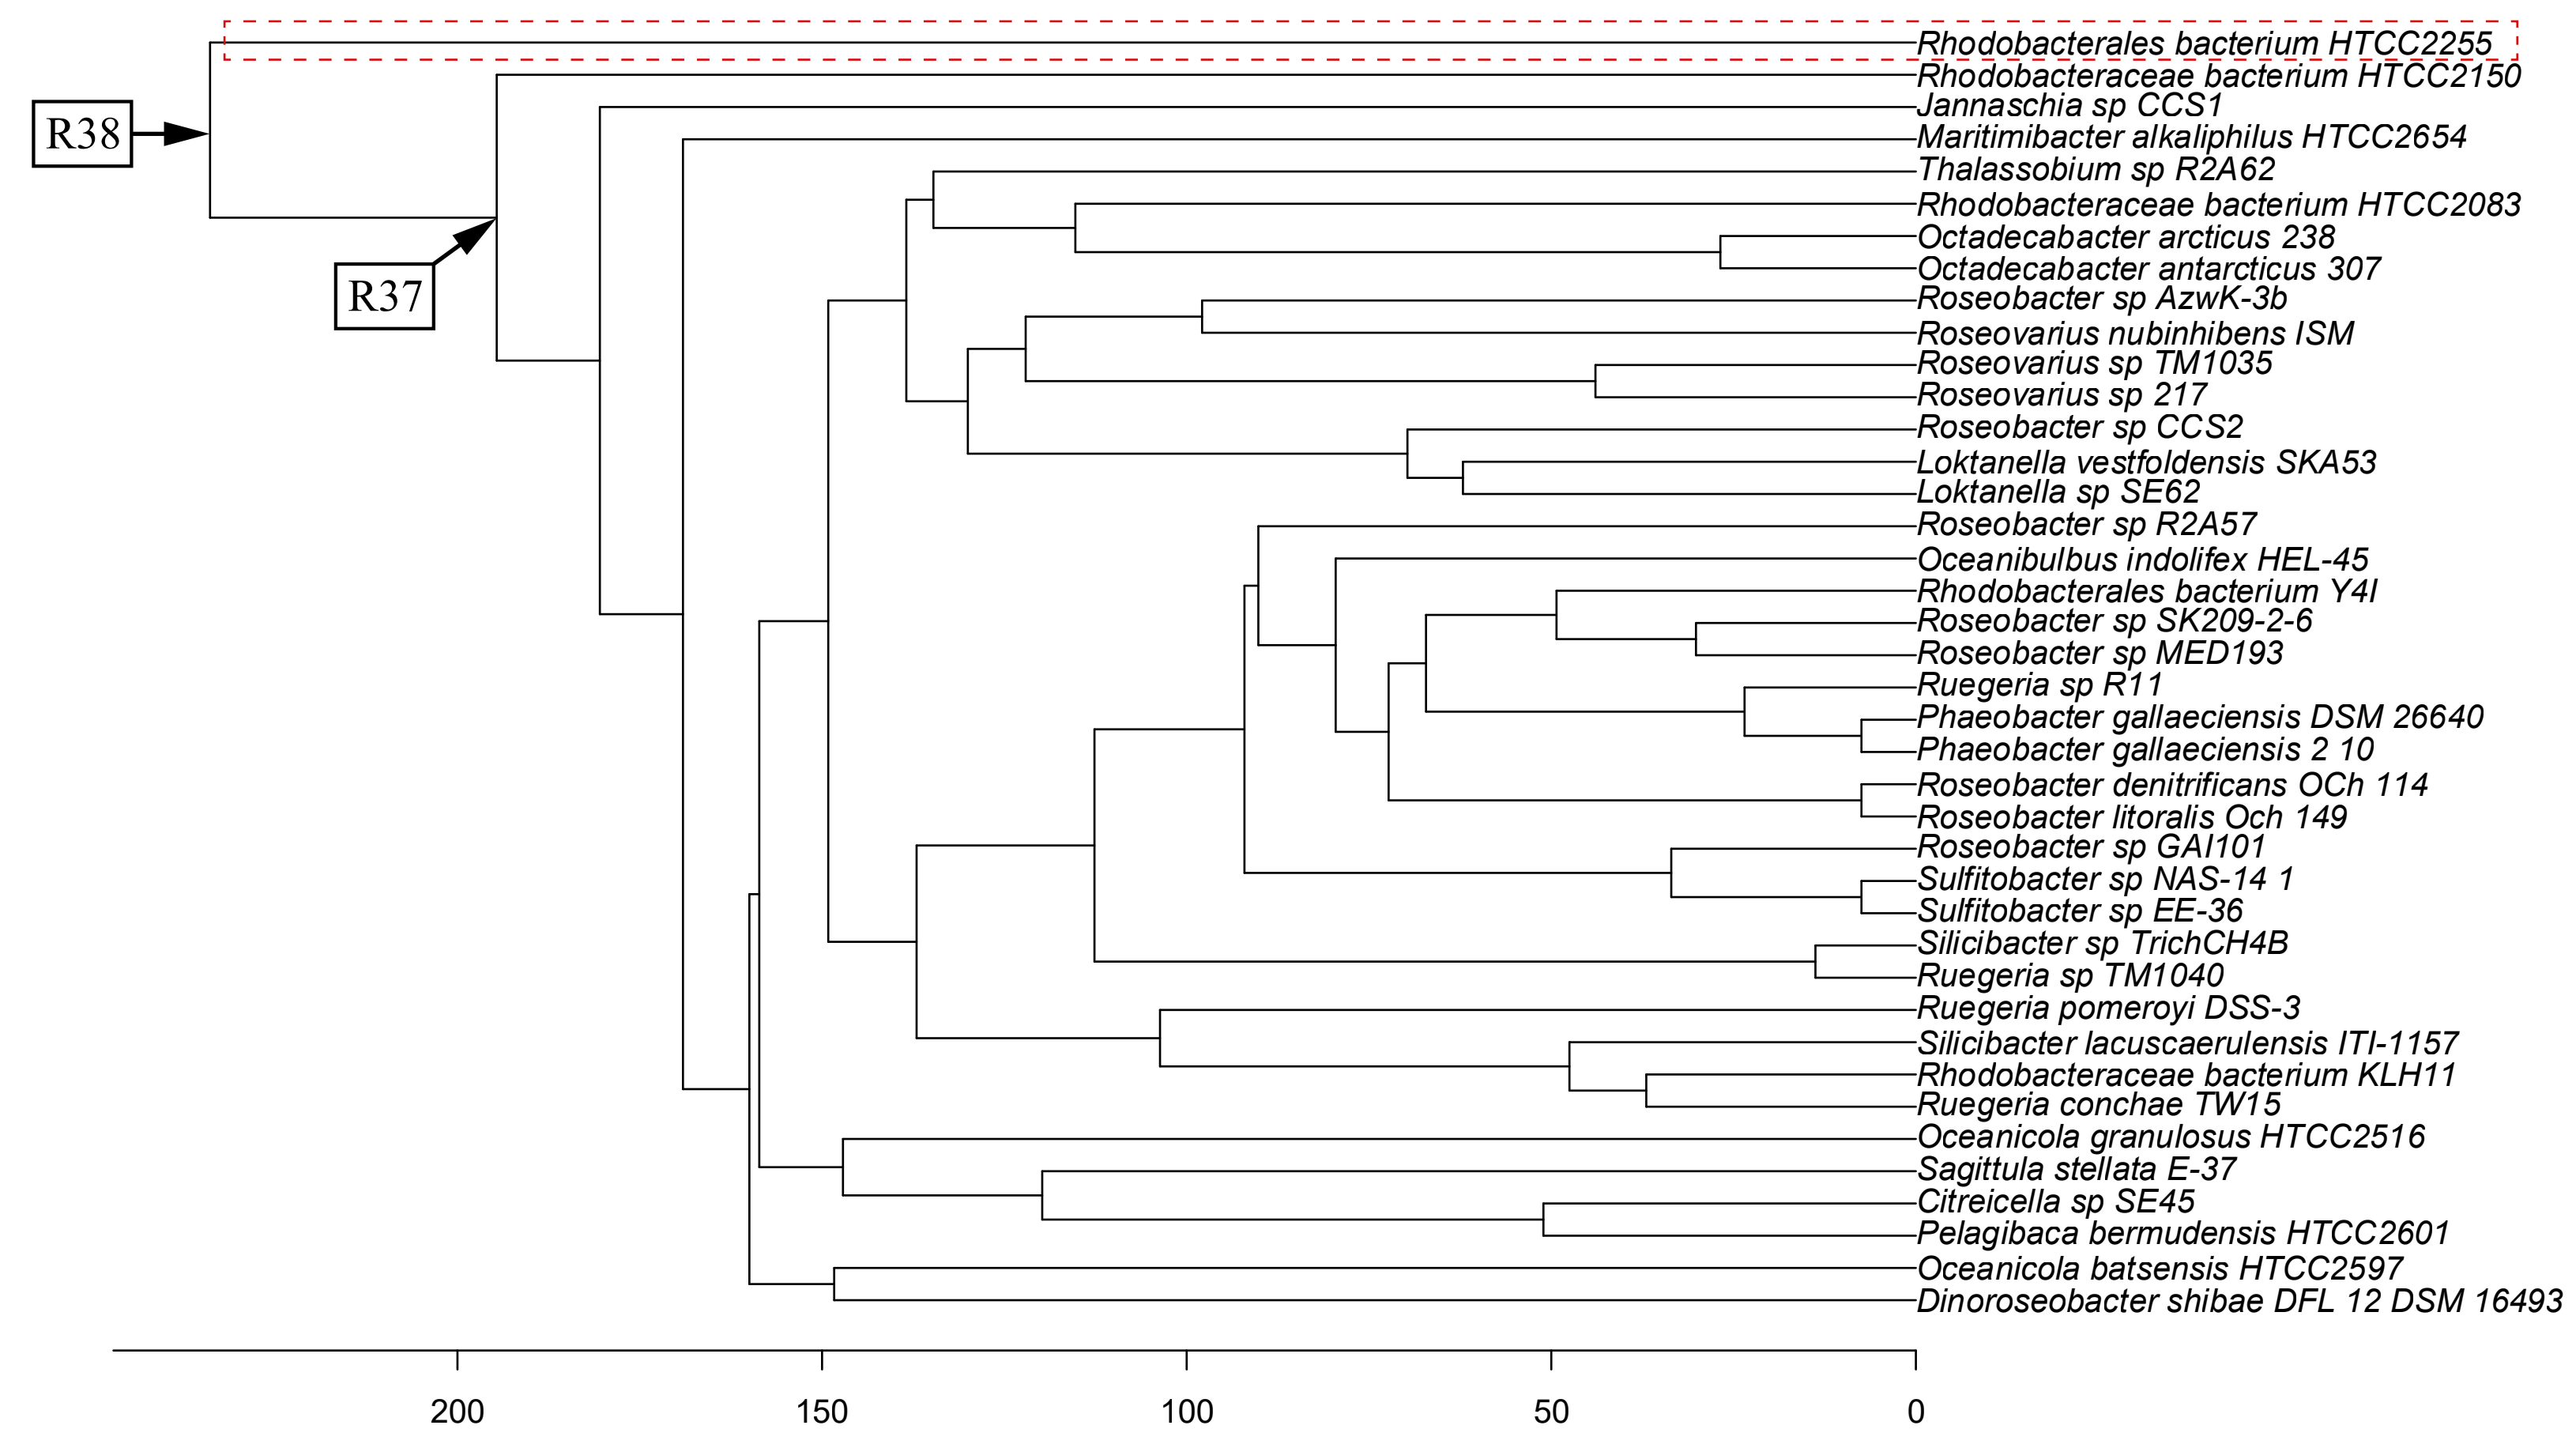

(B) SPOA0014 (COG0220)

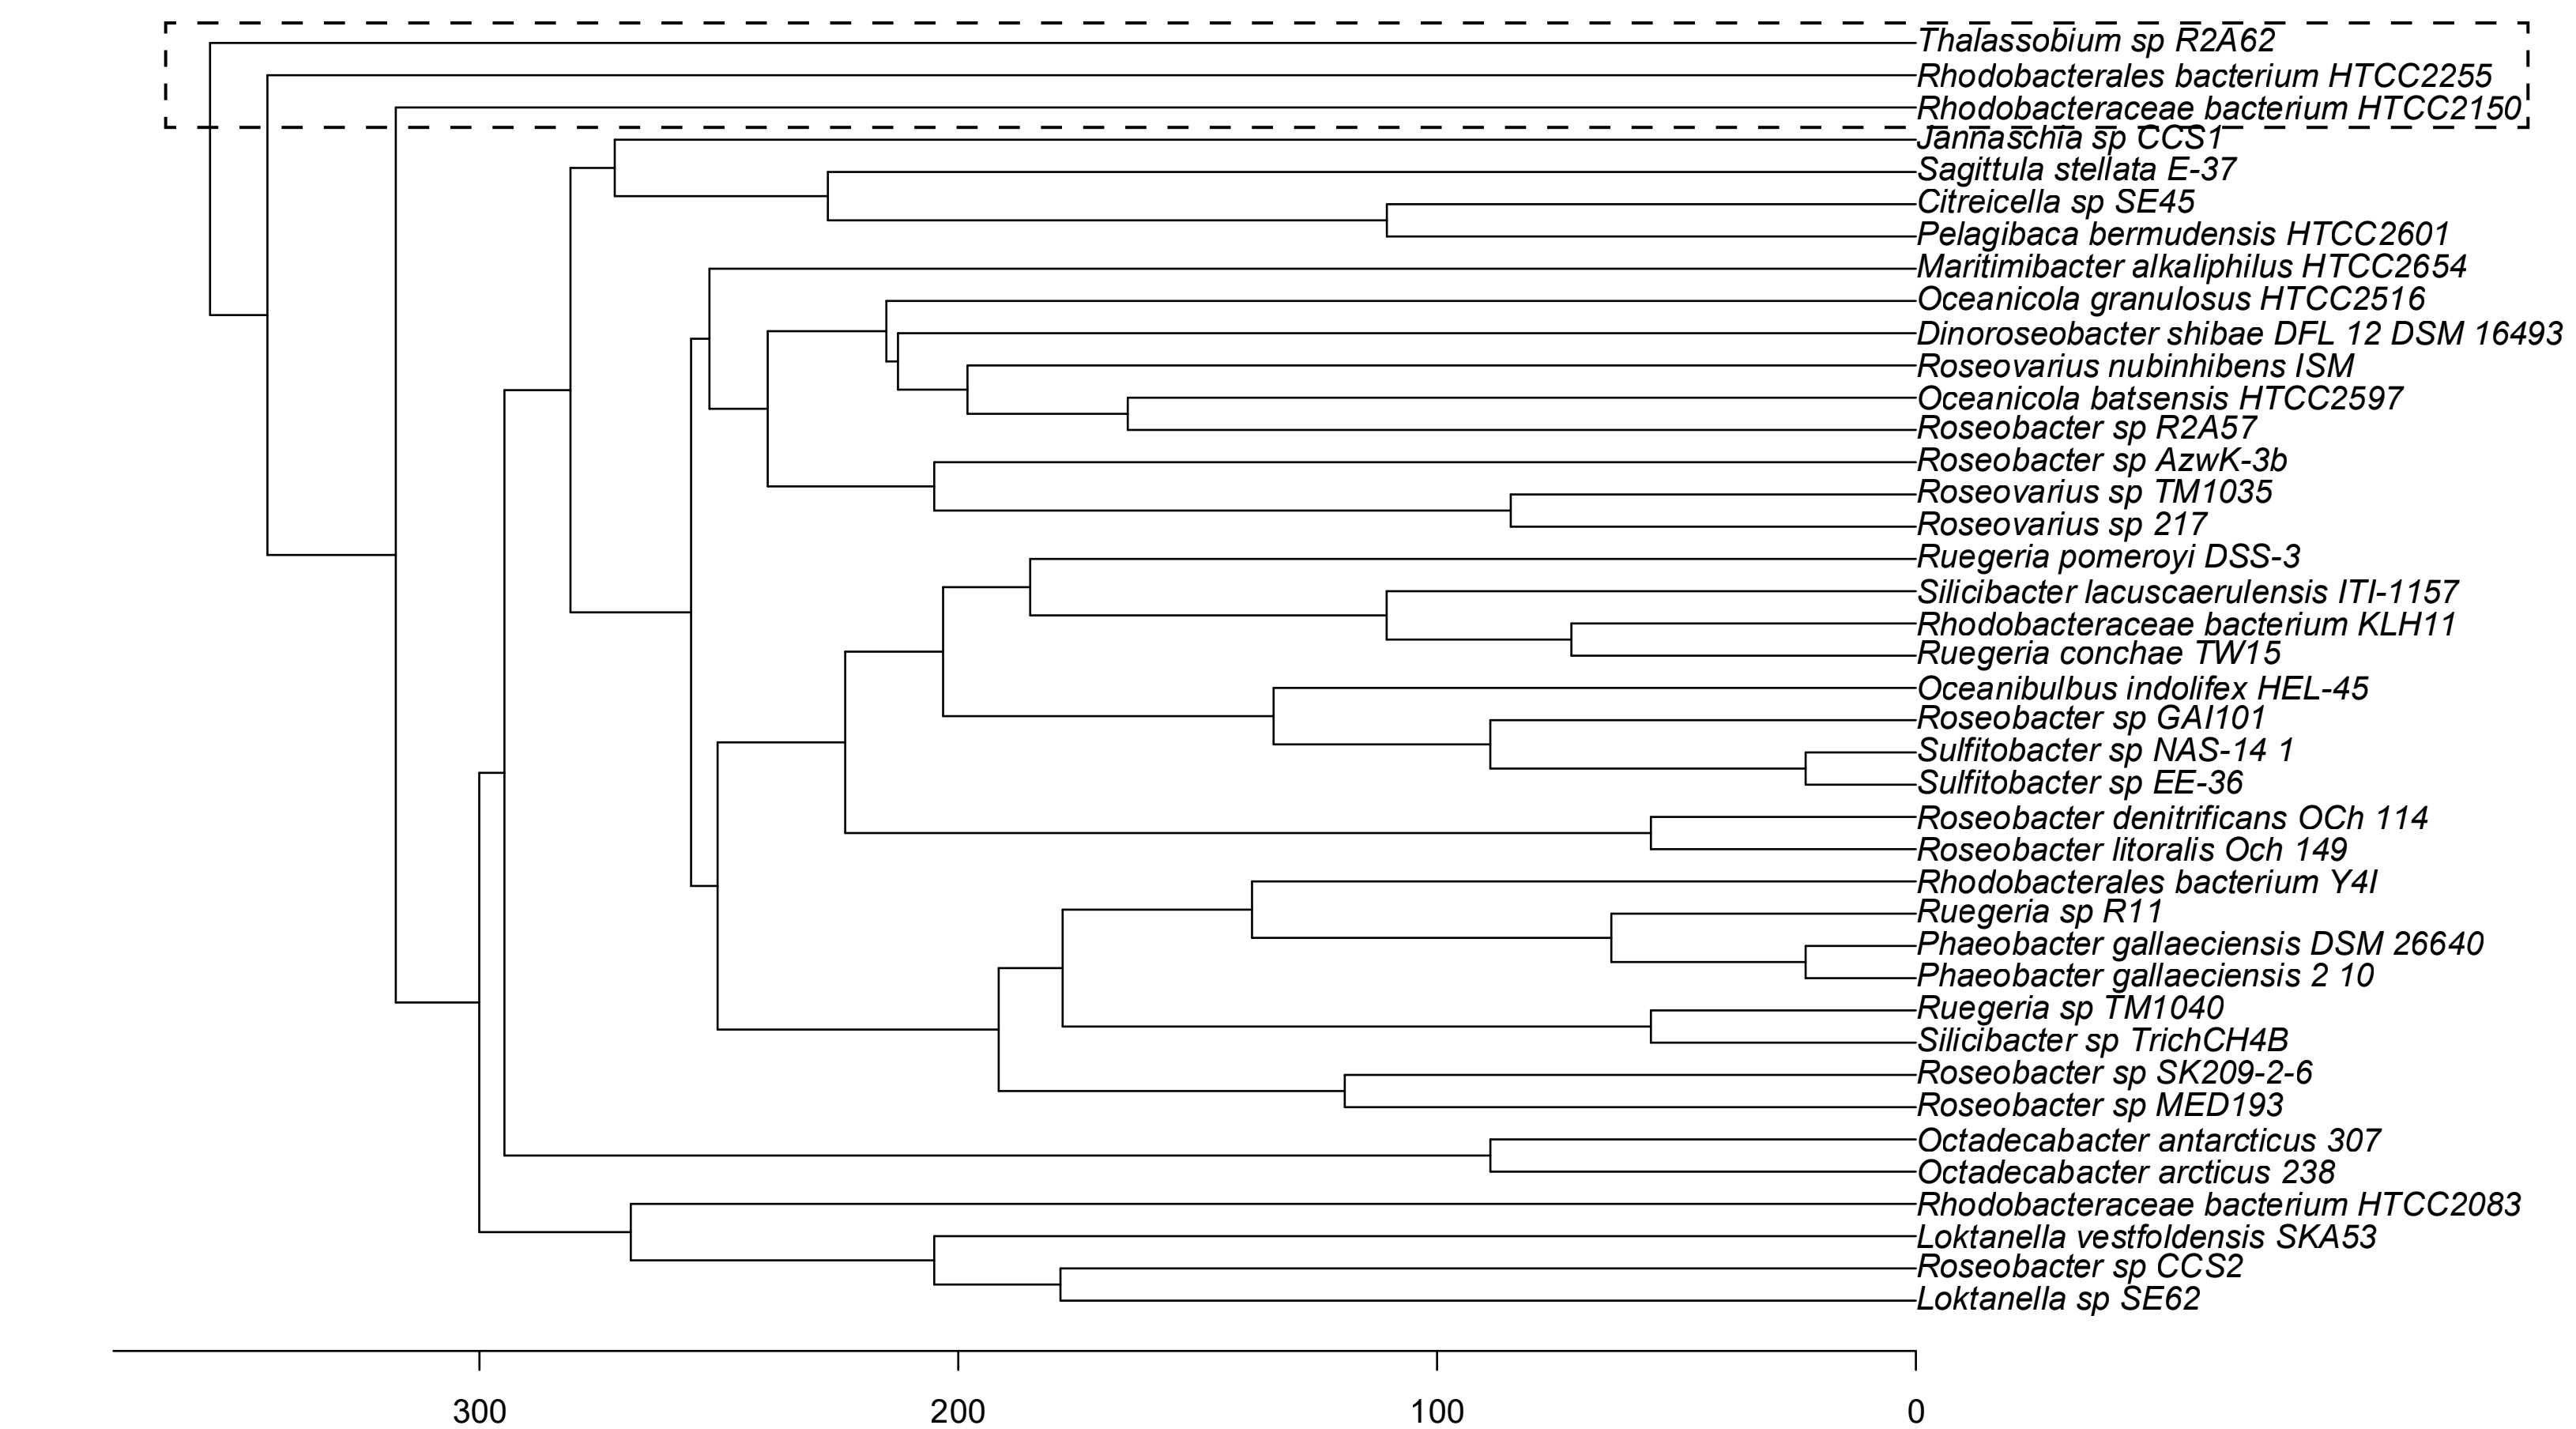

Supplement: ismej201720x4.pdf [file ismej201720x4.pdf]

Fig. S5

(A)

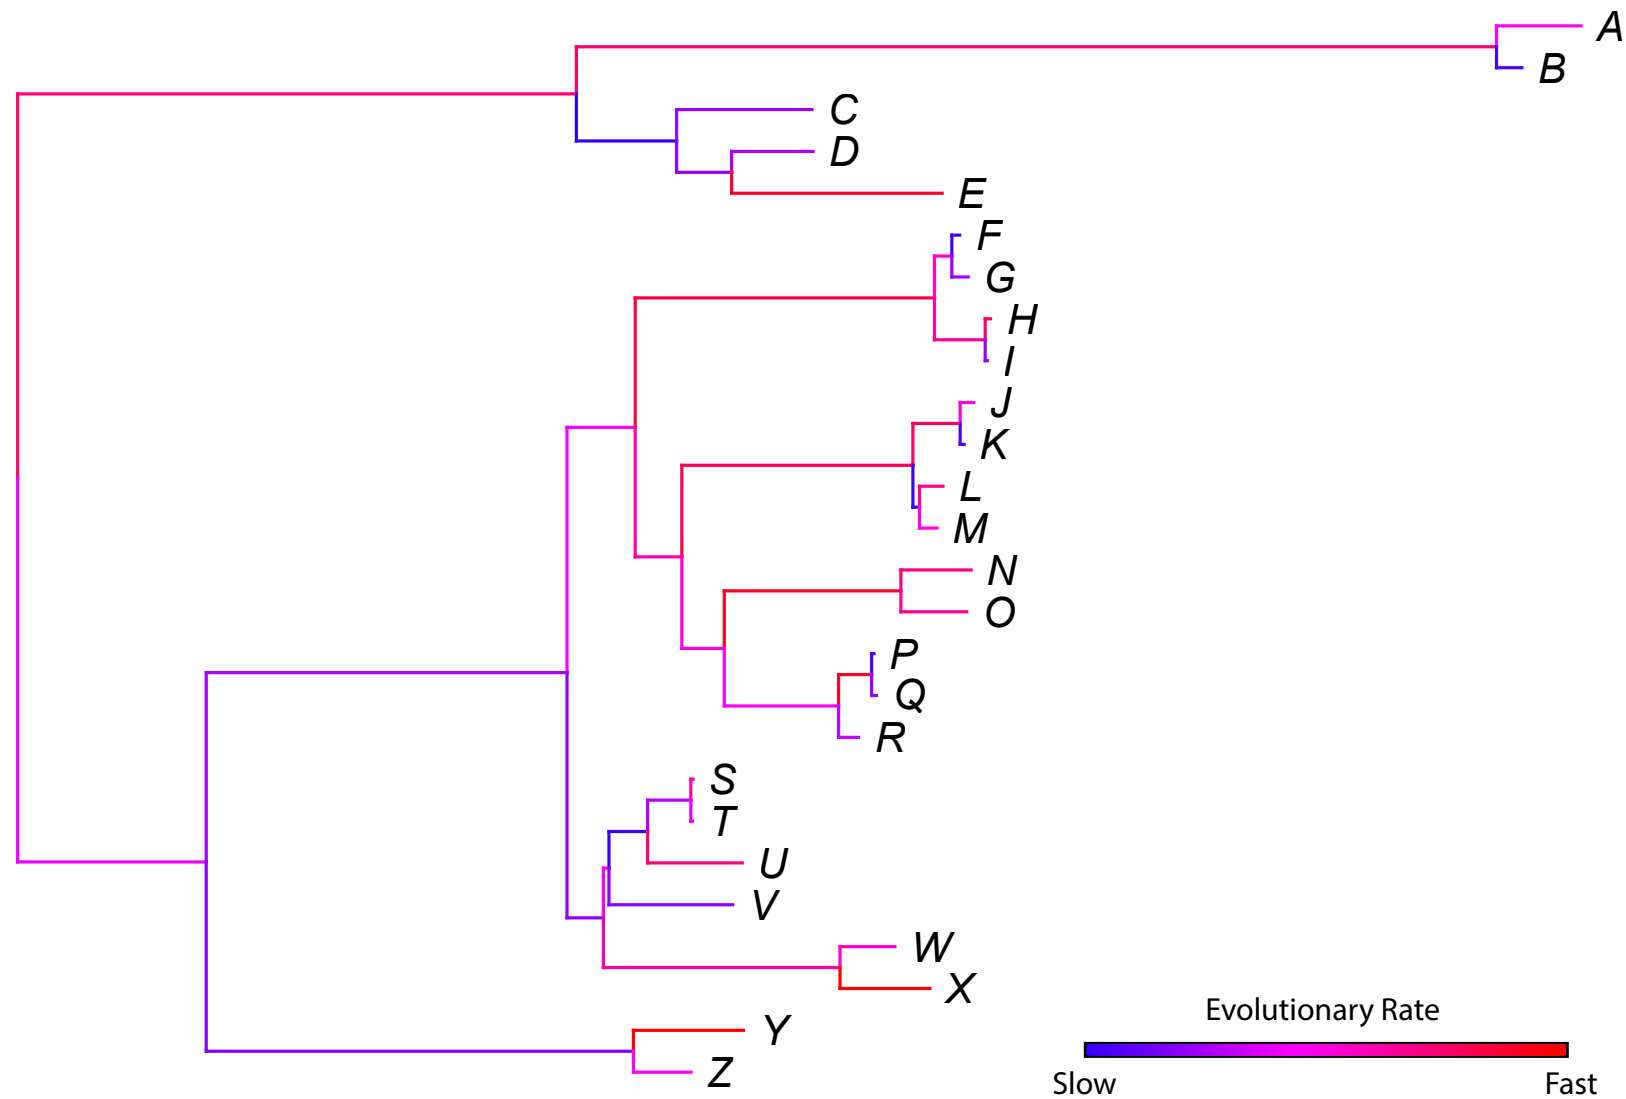

Sequence Divergence

(B)

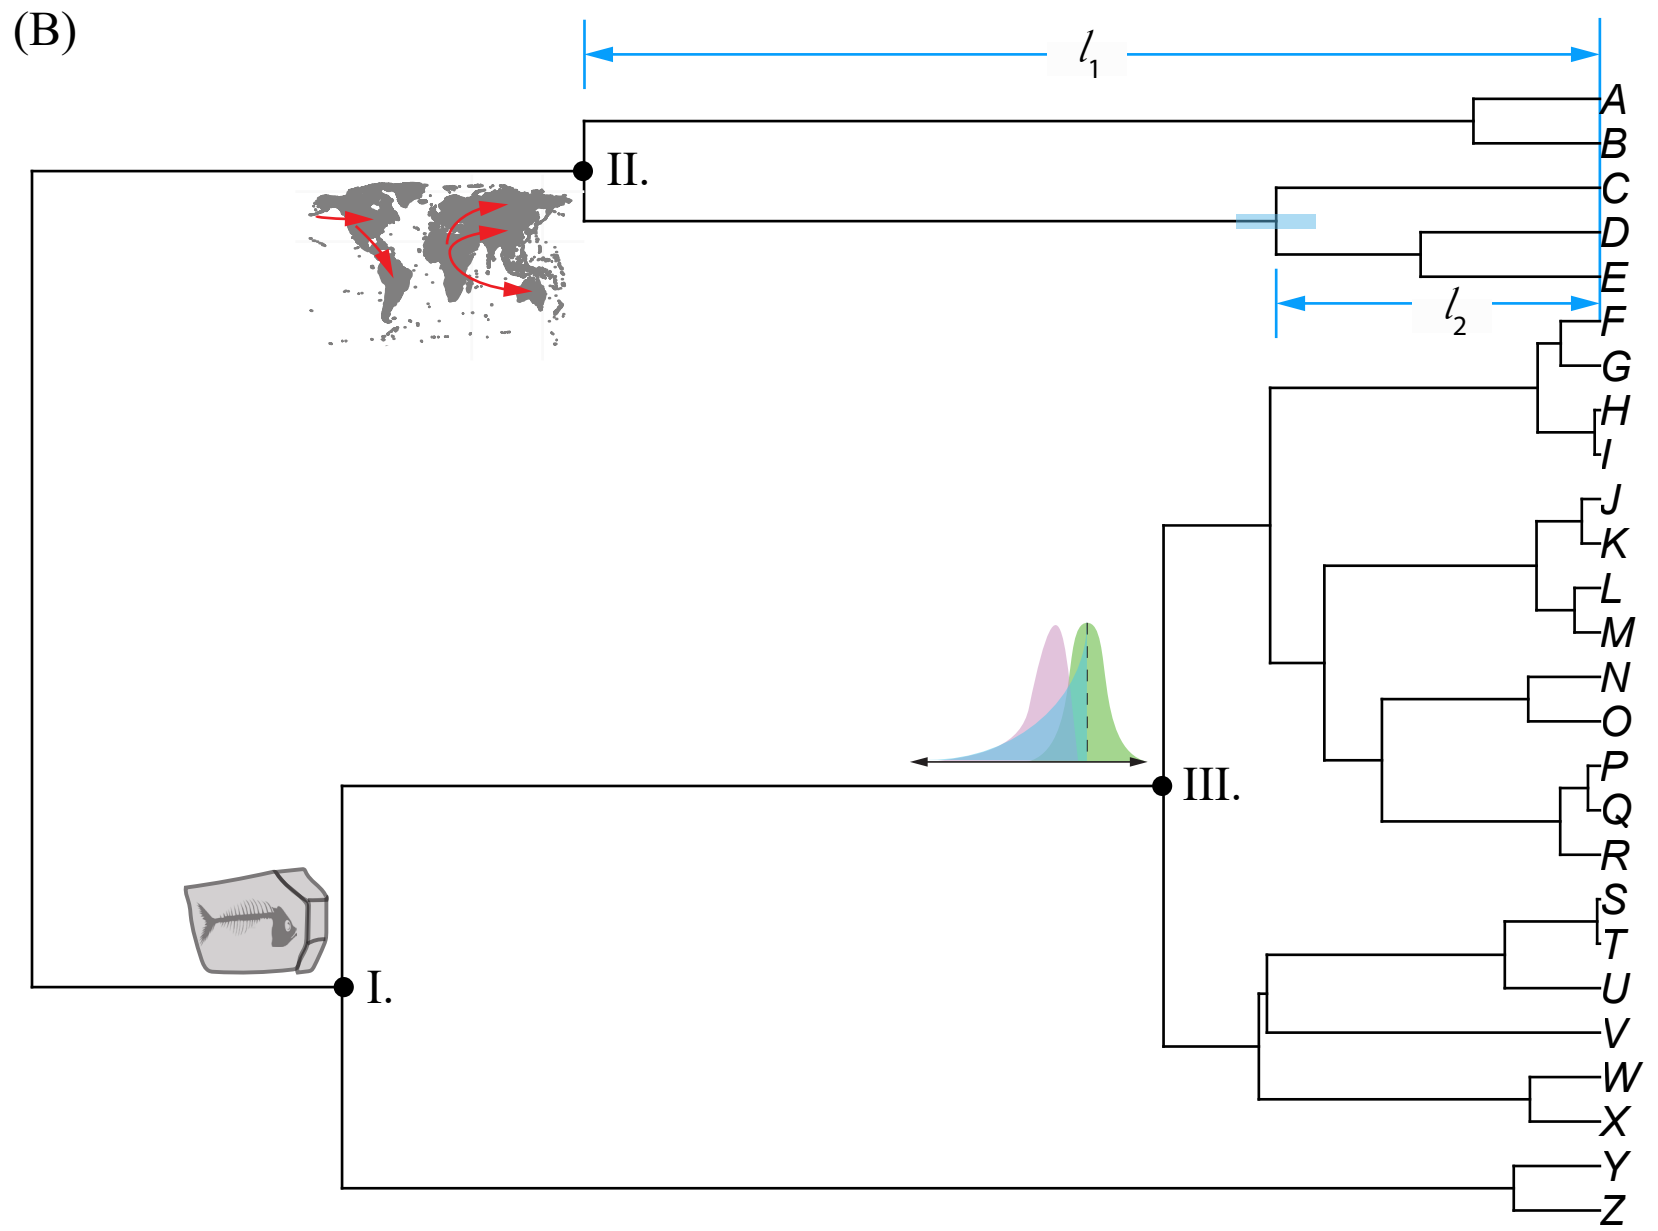

Time of Divergence

Supplement: ismej201720x6.pdf [file ismej201720x6.pdf]
